# Supplementary material for: Comprehensive Expression Profiling of Tumor Cell Lines Identifies Molecular Signatures of Melanoma Progression
Source: PLoS One. 2007 Jul 4;2(7):e594. doi: 10.1371/journal.pone.0000594 (PMC1895889; doi:10.1371/journal.pone.0000594)
Supplement: Dataset S1 — A combined and normalized raw dataset from the 12 sets of microarray data (two sets of primary human melanocytes and ten melanoma cell lines). (18.02 MB DOC) [file pone.0000594.s001.doc]

Dataset S1. A combined and normalized raw dataset from the 12 sets of microarray data (two sets of primary human melanocytes and ten melanoma cell lines).
Probe Set ID	HPM 1_Signal	HPM P_Detection	HPM 2_Signal	HPM 2_Detection	Mel 1_Signal	Mel P_Detection	Mel 2_Signal	Mel 2_Detection	Mel 3_Signal	Mel 3_Detection	Mel 4_Signal	Mel 4_Detection	Mel 5_Signal	Mel 5_Detection	Mel 6_Signal	Mel 6_Detection	Mel 7_Signal	Mel 7_Detection	Mel 8_Signal	Mel 8_Detection	Mel 9_Signal	Mel 9_Detection	Mel 10_Signal	Mel 10_Detection	Descriptions
AFFX-BioB-3_at	1160.3	P	1258.2	P	1369.6	P	1149.5	P	955.3	P	1004.6	P	1099.6	P	935.3	P	1051.2	P	809	P	985.5	P	986.8	P	E. coli /GEN=bioB /DB_XREF=gb:J04423.1 /NOTE=SIF corresponding to nucleotides 2755-3052 of gb:J04423.1 /DEF=E.coli 7,8-diamino-pelargonic acid (bioA), biotin synthetase (bioB), 7-keto-8-amino-pelargonic acid synthetase (bioF), bioC protein, and dethiobiotin synthetase (bioD), complete cds.
AFFX-BioB-5_at	1092.7	P	1007.2	P	847.5	P	784.7	P	939.7	P	875.5	P	1102.7	P	859.7	P	1085.3	P	823.9	P	917.7	P	960.4	P	E. coli /GEN=bioB /DB_XREF=gb:J04423.1 /NOTE=SIF corresponding to nucleotides 2032-2305 of gb:J04423.1 /DEF=E.coli 7,8-diamino-pelargonic acid (bioA), biotin synthetase (bioB), 7-keto-8-amino-pelargonic acid synthetase (bioF), bioC protein, and dethiobiotin synthetase (bioD), complete cds.
AFFX-BioB-M_at	2043.7	P	1789.9	P	1751.7	P	1475.4	P	1870.6	P	2000	P	1870.1	P	1927.1	P	2003.5	P	1318.2	P	1276	P	1413.2	P	E. coli /GEN=bioB /DB_XREF=gb:J04423.1 /NOTE=SIF corresponding to nucleotides 2482-2739 of gb:J04423.1 /DEF=E.coli 7,8-diamino-pelargonic acid (bioA), biotin synthetase (bioB), 7-keto-8-amino-pelargonic acid synthetase (bioF), bioC protein, and dethiobiotin synthetase (bioD), complete cds.
AFFX-BioC-3_at	2598.4	P	2388.6	P	2455.5	P	1996.3	P	2587	P	2396.8	P	2719.3	P	2431.8	P	2519.2	P	2225.7	P	2065.8	P	2553	P	E. coli /GEN=bioC /DB_XREF=gb:J04423.1 /NOTE=SIF corresponding to nucleotides 4626-4878 of gb:J04423.1 /DEF=E.coli 7,8-diamino-pelargonic acid (bioA), biotin synthetase (bioB), 7-keto-8-amino-pelargonic acid synthetase (bioF), bioC protein, and dethiobiotin synthetase (bioD), complete cds.
AFFX-BioC-5_at	3398.1	P	3033.9	P	2911.7	P	2329.4	P	2590.9	P	2565.6	P	3461.3	P	2654.7	P	2987.4	P	2629.4	P	2863.6	P	2822.1	P	E. coli /GEN=bioC /DB_XREF=gb:J04423.1 /NOTE=SIF corresponding to nucleotides 4218-4566 of gb:J04423.1 /DEF=E.coli 7,8-diamino-pelargonic acid (bioA), biotin synthetase (bioB), 7-keto-8-amino-pelargonic acid synthetase (bioF), bioC protein, and dethiobiotin synthetase (bioD), complete cds.
AFFX-BioDn-3_at	17482.8	P	15242.6	P	17370.7	P	14858.8	P	18789.8	P	16396.6	P	17535.8	P	15180	P	16745.5	P	13328.5	P	13405.9	P	13634.5	P	E. coli /GEN=bioD /DB_XREF=gb:J04423.1 /NOTE=SIF corresponding to nucleotides 5286-5570 of gb:J04423.1, not 100% identical /DEF=E.coli 7,8-diamino-pelargonic acid (bioA), biotin synthetase (bioB), 7-keto-8-amino-pelargonic acid synthetase (bioF), bioC protein, and dethiobiotin synthetase (bioD), complete cds.
AFFX-BioDn-5_at	3076	P	3203.3	P	2990.6	P	2384.4	P	2662.3	P	2871.7	P	3338.8	P	2713.9	P	2699.3	P	2318.1	P	2702.6	P	2784.7	P	E. coli /GEN=bioD /DB_XREF=gb:J04423.1 /NOTE=SIF corresponding to nucleotides 4980-5256 of gb:J04423.1, not 100% identical /DEF=E.coli 7,8-diamino-pelargonic acid (bioA), biotin synthetase (bioB), 7-keto-8-amino-pelargonic acid synthetase (bioF), bioC protein, and dethiobiotin synthetase (bioD), complete cds.
AFFX-CreX-3_at	59937.1	P	50039.4	P	58258	P	50627.6	P	59465.2	P	52914.3	P	47726.8	P	46706.7	P	48408.2	P	41079.5	P	43120.3	P	40554.2	P	Bacteriophage P1 /GEN=cre /DB_XREF=gb:X03453.1 /NOTE=SIF corresponding to nucleotides 1089-1495 of gb:X03453.1 /DEF=Bacteriophage P1 cre gene for recombinase protein.
AFFX-CreX-5_at	55098.3	P	44878.3	P	45088.1	P	40087.7	P	43118.1	P	43928.4	P	39364.6	P	38264.2	P	41131.1	P	36838.6	P	39235.9	P	36468	P	Bacteriophage P1 /GEN=cre /DB_XREF=gb:X03453.1 /NOTE=SIF corresponding to nucleotides 513-1047 of gb:X03453.1 /DEF=Bacteriophage P1 cre gene for recombinase protein.
AFFX-DapX-3_at	8.7	A	43	A	4.7	A	10.5	A	7.4	A	15	A	30.1	A	3.1	A	9.3	A	11.1	A	6.4	A	8.3	A	B. subtilis /GEN=jojG /DB_XREF=gb:L38424.1 /NOTE=SIF corresponding to nucleotides 2684-3130 of gb:L38424.1 /DEF=Bacillus subtilis dihydropicolinate reductase (jojE) gene, complete cds; poly(A) polymerase (jojI) gene, complete cds; biotin acetyl-CoA-carboxylase ligase (birA) gene, complete cds; jojC, jojD, jojF, jojG, jojH genes, complete cds s.
AFFX-DapX-5_at	35	A	53.7	A	24.3	A	48.5	A	55.4	A	9.9	A	32.6	A	37.4	A	37.5	A	45.7	A	44.5	A	27.6	A	B. subtilis /GEN=dapB /DB_XREF=gb:L38424.1 /NOTE=SIF corresponding to nucleotides 1428-1926 of gb:L38424.1 /DEF=Bacillus subtilis dihydropicolinate reductase (jojE) gene, complete cds; poly(A) polymerase (jojI) gene, complete cds; biotin acetyl-CoA-carboxylase ligase (birA) gene, complete cds; jojC, jojD, jojF, jojG, jojH genes, complete cds s.
AFFX-DapX-M_at	52.5	A	62.6	A	38	A	44.6	A	39.4	A	16.1	A	140.7	A	41.8	A	13.8	A	40.8	A	20.8	A	39.6	A	B. subtilis /GEN=dapB, jojF /DB_XREF=gb:L38424.1 /NOTE=SIF corresponding to nucleotides 2020-2580 of gb:L38424.1 /DEF=Bacillus subtilis dihydropicolinate reductase (jojE) gene, complete cds; poly(A) polymerase (jojI) gene, complete cds; biotin acetyl-CoA-carboxylase ligase (birA) gene, complete cds; jojC, jojD, jojF, jojG, jojH genes, complete cds s.
AFFX-HSAC07/X00351_3_at	64618.1	P	53866.7	P	44280.2	P	58669.5	P	64284.9	P	40471.6	P	41739.7	P	49298.8	P	53697.9	P	55790.2	P	48618.6	P	41763	P	H. sapiens /GEN=beta-actin /DB_XREF=gb:X00351.1 /NOTE=SIF corresponding to nucleotides 1201-1738 of gb:X00351.1, not 100% identical /DEF=Human mRNA for beta-actin.
AFFX-HSAC07/X00351_5_at	68843.4	P	55729.2	P	31561.6	P	59790.3	P	61274.1	P	38006.6	P	35892.9	P	44146.9	P	54576.9	P	56200.6	P	47237.2	P	34459.1	P	H. sapiens /GEN=beta-actin /DB_XREF=gb:X00351.1 /NOTE=SIF corresponding to nucleotides 50-584 of gb:X00351.1 /DEF=Human mRNA for beta-actin.
AFFX-HSAC07/X00351_M_at	72866	P	59553.4	P	41681.1	P	64106.8	P	68671.8	P	44649.2	P	41199.8	P	50836.9	P	58226.2	P	59421.3	P	50737.5	P	41916.5	P	H. sapiens /GEN=beta-actin /DB_XREF=gb:X00351.1 /NOTE=SIF corresponding to nucleotides 645-1173 of gb:X00351.1 /DEF=Human mRNA for beta-actin.
AFFX-hum_alu_at	70073.7	P	54576.3	P	62551.6	P	57748.5	P	68551.6	P	56910.8	P	44992.6	P	52242.1	P	51038.2	P	51710.9	P	50616.7	P	44167.9	P	H. sapiens /GEN=Alu-Sq /DB_XREF=gb:U14573.1 /NOTE=SIF corresponding to nucleotides 11-278 of gb:U14573.1, not 100% identical /DEF=Human Alu-Sq subfamily consensus sequence.
AFFX-HUMGAPDH/M33197_3_at	50667.7	P	40568.9	P	55421.5	P	46042.9	P	64307.7	P	49863.6	P	36543.7	P	32494.1	P	47677	P	51923.9	P	42477.5	P	43440.9	P	H. sapiens /GEN=GAPD /DB_XREF=gb:M33197.1 /NOTE=SIF corresponding to nucleotides 908-1256 of gb:M33197.1 /DEF=Human glyceraldehyde-3-phosphate dehydrogenase (GAPDH) mRNA, complete cds.
AFFX-HUMGAPDH/M33197_5_at	51316.6	P	44024.3	P	55789.5	P	47514.1	P	71704.8	P	53867.4	P	39354.4	P	27221.2	P	50701.3	P	54177.1	P	42886.7	P	44563.3	P	H. sapiens /GEN=GAPD /DB_XREF=gb:M33197.1 /NOTE=SIF corresponding to nucleotides 87-387 of gb:M33197.1 /DEF=Human glyceraldehyde-3-phosphate dehydrogenase (GAPDH) mRNA, complete cds.
AFFX-HUMGAPDH/M33197_M_at	53886.9	P	44853.9	P	58410.3	P	48957	P	70165.5	P	53675.6	P	39588.6	P	31794.7	P	48533.1	P	51096.3	P	41974.6	P	41179.3	P	H. sapiens /GEN=GAPD /DB_XREF=gb:M33197.1 /NOTE=SIF corresponding to nucleotides 493-832 of gb:M33197.1 /DEF=Human glyceraldehyde-3-phosphate dehydrogenase (GAPDH) mRNA, complete cds.
AFFX-HUMISGF3A/M97935_3_at	1479.4	P	1442.3	P	3458.6	P	1365.6	P	1761.9	P	1998	P	2649.9	P	3611.4	P	2769.3	P	3531.3	P	3534.1	P	3289	P	H. sapiens /GEN=ISGF-3 /DB_XREF=gb:M97935.1 /NOTE=SIF corresponding to nucleotides 3413-3914 of gb:M97935.1 /DEF=Homo sapiens transcription factor ISGF-3 mRNA, complete cds.
AFFX-HUMISGF3A/M97935_5_at	306.6	P	348.9	P	405.8	P	168.4	P	312.5	P	315.6	P	708.9	P	361.6	P	428.7	P	606.4	P	650.2	P	184.8	P	H. sapiens /GEN=ISGF-3 /DB_XREF=gb:M97935.1 /NOTE=SIF corresponding to nucleotides 241-796 of gb:M97935.1 /DEF=Homo sapiens transcription factor ISGF-3 mRNA, complete cds.
AFFX-HUMISGF3A/M97935_MA_at	805.9	P	798.3	P	1345.1	P	520.8	P	838.9	P	925.4	P	1288.8	P	1262.3	P	1039.5	P	1377	P	1288.4	P	769.5	P	H. sapiens /GEN=ISGF-3 /DB_XREF=gb:M97935.1 /NOTE=SIF corresponding to nucleotides 1397-1820 of gb:M97935.1 /DEF=Homo sapiens transcription factor ISGF-3 mRNA, complete cds.
AFFX-HUMISGF3A/M97935_MB_at	541.9	P	623	P	1098.7	P	429.4	P	601.2	P	584.9	P	841.4	P	1042.5	P	775.7	P	924	P	1125.7	P	845.5	P	H. sapiens /GEN=ISGF-3 /DB_XREF=gb:M97935.1 /NOTE=SIF corresponding to nucleotides 2292-2880 of gb:M97935.1 /DEF=Homo sapiens transcription factor ISGF-3 mRNA, complete cds.
AFFX-HUMRGE/M10098_3_at	438.8	P	430.9	P	538	P	270.8	P	385.3	P	494.5	P	559.7	M	324.9	P	446.6	P	418.6	P	404.5	P	274.2	P	H. sapiens /GEN=18S rRNA /DB_XREF=gb:M10098.1 /NOTE=SIF corresponding to nucleotides 1322-1910 of gb:M10098.1 /DEF=Human 18S rRNA gene, complete.
AFFX-HUMRGE/M10098_5_at	285.2	A	307.5	P	482.8	P	213.9	P	284.4	P	288.2	P	68.5	A	210.5	P	290.7	P	244.9	M	222.7	A	301.5	P	H. sapiens /GEN=18S rRNA /DB_XREF=gb:M10098.1 /NOTE=SIF corresponding to nucleotides 115-595 of gb:M10098.1 /DEF=Human 18S rRNA gene, complete.
AFFX-HUMRGE/M10098_M_at	187.8	A	298.3	P	343.2	P	177.5	P	287.6	P	189.7	A	144.4	A	182.6	P	191.2	P	277.9	P	233.5	M	240.8	P	H. sapiens /GEN=18S rRNA /DB_XREF=gb:M10098.1 /NOTE=SIF corresponding to nucleotides 688-1219 of gb:M10098.1 /DEF=Human 18S rRNA gene, complete.
AFFX-LysX-3_at	6.1	A	66	M	19.9	A	5	A	31.1	A	39	A	39.1	A	4.6	A	25	A	22.4	A	30	A	7.2	A	B. subtilis /GEN=lys /DB_XREF=gb:X17013.1 /NOTE=SIF corresponding to nucleotides 1061-1343 of gb:X17013.1, not 100% identical /DEF=B subtilis lys gene for diaminopimelate decarboxylase (EC 4.1.1.20).
AFFX-LysX-5_at	13.5	A	18.7	A	10.2	A	35.4	A	55.9	A	9.1	A	21.5	A	2	A	19.2	A	21.9	A	54.4	A	13	A	B. subtilis /GEN=lys /DB_XREF=gb:X17013.1 /NOTE=SIF corresponding to nucleotides 387-658 of gb:X17013.1, not 100% identical /DEF=B subtilis lys gene for diaminopimelate decarboxylase (EC 4.1.1.20).
AFFX-LysX-M_at	35.5	A	14	A	9	A	26.1	A	64.8	A	81.9	A	32.4	A	46.2	A	12.8	A	10.7	A	57	A	53.2	A	B. subtilis /GEN=lys /DB_XREF=gb:X17013.1 /NOTE=SIF corresponding to nucleotides 720-990 of gb:X17013.1, not 100% identical /DEF=B subtilis lys gene for diaminopimelate decarboxylase (EC 4.1.1.20).
AFFX-M27830_3_at	80.6	A	74.3	A	193.5	A	132.5	A	188.1	A	99.6	A	162.6	A	224.7	A	236.3	A	62.4	A	82.6	A	302.4	A	H. sapiens /GEN=28S rRNA /DB_XREF=gb:M27830.1 /NOTE=SIF corresponding to nucleotides 1800-1891 of gb:M27830.1 /DEF=Human 28S ribosomal RNA gene, complete cds.
AFFX-M27830_5_at	2117.4	P	3135.7	P	1938.5	P	1372.9	P	1703.1	P	1859.6	P	1730.4	P	836.7	P	1591.8	P	1000.4	P	1502.9	P	1602.3	P	H. sapiens /GEN=28S rRNA /DB_XREF=gb:M27830.1 /NOTE=SIF corresponding to nucleotides 75-171 of gb:M27830.1 /DEF=Human 28S ribosomal RNA gene, complete cds.
AFFX-M27830_M_at	2828.5	P	3287.9	P	3971.8	P	1822.8	P	2950.6	P	2902.9	P	3606.2	P	1565.9	P	1642.2	P	1430.9	P	1471.8	P	2248.6	P	H. sapiens /GEN=28S rRNA /DB_XREF=gb:M27830.1 /NOTE=SIF corresponding to nucleotides 529-1289 of gb:M27830.1 /DEF=Human 28S ribosomal RNA gene, complete cds.
AFFX-PheX-3_at	82.6	A	101.6	A	16.7	A	24	A	80.6	A	29.6	A	92.1	A	30.1	A	87.6	A	104.9	A	82.3	A	68.7	A	B. subtilis /GEN=pheB /DB_XREF=gb:M24537.1 /NOTE=SIF corresponding to nucleotides 2885-3326 of gb:M24537.1, not 100% identical /DEF=Bacillus subtillis sporulation protein (spoOB), GTP-binding protein (obg), phenylalanine biosynthesis associated protein (pheB), and monofunctional prephenate dehydratase (pheA) genes, complete cds.
AFFX-PheX-5_at	8.5	A	10.6	A	26.4	A	5.4	A	5.1	A	35.7	A	25.2	A	5.1	A	6.4	A	6.2	A	6.4	A	7.9	A	B. subtilis /GEN=pheA /DB_XREF=gb:M24537.1 /NOTE=SIF corresponding to nucleotides 2028-2375 of gb:M24537.1, not 100% identical /DEF=Bacillus subtillis sporulation protein (spoOB), GTP-binding protein (obg), phenylalanine biosynthesis associated protein (pheB), and monofunctional prephenate dehydratase (pheA) genes, complete cds.
AFFX-PheX-M_at	5.5	A	2.1	A	1.5	A	4	A	8.3	A	7.4	A	119.6	A	1.9	A	4.1	A	5.2	A	4.2	A	2.1	A	B. subtilis /GEN=pheA /DB_XREF=gb:M24537.1 /NOTE=SIF corresponding to nucleotides 2437-2828 of gb:M24537.1 /DEF=Bacillus subtillis sporulation protein (spoOB), GTP-binding protein (obg), phenylalanine biosynthesis associated protein (pheB), and monofunctional prephenate dehydratase (pheA) genes, complete cds.
AFFX-r2-Bs-dap-3_at	4	A	1.1	A	7.6	A	10.6	A	4.8	A	2.2	A	7.2	A	2.9	A	4.7	A	31.7	A	3.5	A	3.3	A	B. subtilis /GEN=jojG /DB_XREF=gb:L38424.1 /NOTE=SIF corresponding to nucleotides 2634-3089 of gb:L38424.1 /DEF=Bacillus subtilis dihydropicolinate reductase (jojE) gene, complete cds; poly(A) polymerase (jojI) gene, complete cds; biotin acetyl-CoA-carboxylase ligase (birA) gene, complete cds; jojC, jojD, jojF, jojG, jojH genes, complete cds s.
AFFX-r2-Bs-dap-5_at	7.5	A	4.3	A	4.8	A	3.3	A	6.4	A	3.9	A	22.5	A	5.3	A	6.3	A	9.6	A	3.3	A	6.2	A	B. subtilis /GEN=dapB /DB_XREF=gb:L38424.1 /NOTE=SIF corresponding to nucleotides 1439-1846 of gb:L38424.1 /DEF=Bacillus subtilis dihydropicolinate reductase (jojE) gene, complete cds; poly(A) polymerase (jojI) gene, complete cds; biotin acetyl-CoA-carboxylase ligase (birA) gene, complete cds; jojC, jojD, jojF, jojG, jojH genes, complete cds s.
AFFX-r2-Bs-dap-M_at	2.7	A	1.8	A	43.2	A	27	A	1.8	A	2.1	A	18.3	A	4.1	A	2.3	A	40.3	A	1.9	A	1.2	A	B. subtilis /GEN=dapB, jojF /DB_XREF=gb:L38424.1 /NOTE=SIF corresponding to nucleotides 2055-2578 of gb:L38424.1 /DEF=Bacillus subtilis dihydropicolinate reductase (jojE) gene, complete cds; poly(A) polymerase (jojI) gene, complete cds; biotin acetyl-CoA-carboxylase ligase (birA) gene, complete cds; jojC, jojD, jojF, jojG, jojH genes, complete cds s.
AFFX-r2-Bs-lys-3_at	16.9	A	49.5	P	38.8	A	45.2	A	10.3	A	97.1	A	62.5	A	29	P	73	A	36.2	A	19.1	A	47.8	A	B. subtilis /GEN=lys /DB_XREF=gb:X17013.1 /NOTE=SIF corresponding to nucleotides 1008-1263 of gb:X17013.1, not 100% identical /DEF=B subtilis lys gene for diaminopimelate decarboxylase (EC 4.1.1.20).
AFFX-r2-Bs-lys-5_at	17.5	A	4.6	A	46.7	A	2.7	A	5.3	A	2.1	A	65.6	A	1.9	A	2.5	A	3.3	A	20.4	A	4.7	A	B. subtilis /GEN=lys /DB_XREF=gb:X17013.1 /NOTE=SIF corresponding to nucleotides 411-659 of gb:X17013.1, not 100% identical /DEF=B subtilis lys gene for diaminopimelate decarboxylase (EC 4.1.1.20).
AFFX-r2-Bs-lys-M_at	21.8	A	8.6	A	46.8	A	38.2	A	46.3	A	20.7	A	33.2	A	34.6	A	8.7	A	3.3	A	2	A	24.4	A	B. subtilis /GEN=lys /DB_XREF=gb:X17013.1 /NOTE=SIF corresponding to nucleotides 673-1002 of gb:X17013.1, not 100% identical /DEF=B subtilis lys gene for diaminopimelate decarboxylase (EC 4.1.1.20).
AFFX-r2-Bs-phe-3_at	210.9	A	106	A	56.2	A	63.7	A	55.8	A	19.4	A	29.4	A	85.8	A	122.5	M	52.7	A	192.8	A	65.3	A	B. subtilis /GEN=pheB /DB_XREF=gb:M24537.1 /NOTE=SIF corresponding to nucleotides 2897-3200 of gb:M24537.1, not 100% identical /DEF=Bacillus subtillis sporulation protein (spoOB), GTP-binding protein (obg), phenylalanine biosynthesis associated protein (pheB), and monofunctional prephenate dehydratase (pheA) genes, complete cds.
AFFX-r2-Bs-phe-5_at	44.6	A	7.5	A	20.2	A	2.1	A	1.4	A	6.6	A	18	A	2.3	A	8.1	A	1.2	A	11.1	A	41.2	A	B. subtilis /GEN=pheA /DB_XREF=gb:M24537.1 /NOTE=SIF corresponding to nucleotides 2116-2382 of gb:M24537.1 /DEF=Bacillus subtillis sporulation protein (spoOB), GTP-binding protein (obg), phenylalanine biosynthesis associated protein (pheB), and monofunctional prephenate dehydratase (pheA) genes, complete cds.
AFFX-r2-Bs-phe-M_at	54.1	A	8.1	A	27.4	A	6.1	A	5.9	A	38.5	A	24.6	A	16.6	A	4.8	A	6.1	A	4.6	A	24.4	A	B. subtilis /GEN=pheA /DB_XREF=gb:M24537.1 /NOTE=SIF corresponding to nucleotides 2484-2875 of gb:M24537.1 /DEF=Bacillus subtillis sporulation protein (spoOB), GTP-binding protein (obg), phenylalanine biosynthesis associated protein (pheB), and monofunctional prephenate dehydratase (pheA) genes, complete cds.
AFFX-r2-Bs-thr-3_s_at	8.5	A	20.9	A	14.7	A	11.9	A	104.6	A	5.4	A	93.7	A	15.7	A	20.6	A	43.4	A	33.4	A	8.6	A	B. subtilis /GEN=thrB /DB_XREF=gb:X04603.1 /NOTE=SIF corresponding to nucleotides 1735-2143 of gb:X04603.1 /DEF=B. subtilis thrB and thrC genes for homoserine kinase and threonine synthase.
AFFX-r2-Bs-thr-5_s_at	123	P	49.6	A	117.2	P	69.3	A	159.1	M	126.6	A	39.7	A	78.9	P	100.1	A	77.7	A	102.4	A	92.3	A	B. subtilis /GEN=thrC /DB_XREF=gb:X04603.1 /NOTE=SIF corresponding to nucleotides 290-888 of gb:X04603.1 /DEF=B. subtilis thrB and thrC genes for homoserine kinase and threonine synthase.
AFFX-r2-Bs-thr-M_s_at	20.2	A	30.1	A	43.5	A	6.5	A	95.9	A	26.6	A	72.1	A	90.5	A	83.4	A	65.1	A	4.3	A	69.8	A	B. subtilis /GEN=thrC, thrB /DB_XREF=gb:X04603.1 /NOTE=SIF corresponding to nucleotides 1045-1556 of gb:X04603.1 /DEF=B. subtilis thrB and thrC genes for homoserine kinase and threonine synthase.
AFFX-r2-Ec-bioB-3_at	1862.1	P	1715.2	P	1683	P	1450.1	P	1700.3	P	1515.4	P	1700.3	P	1535.2	P	1724.4	P	1256.5	P	1587.2	P	1521.6	P	E. coli /GEN=bioB /DB_XREF=gb:J04423.1 /NOTE=SIF corresponding to nucleotides 2772-3004 of gb:J04423.1 /DEF=E.coli 7,8-diamino-pelargonic acid (bioA), biotin synthetase (bioB), 7-keto-8-amino-pelargonic acid synthetase (bioF), bioC protein, and dethiobiotin synthetase (bioD), complete cds.
AFFX-r2-Ec-bioB-5_at	1511.8	P	1312.2	P	1251.9	P	1045.9	P	1161.7	P	1207.8	P	1145.8	P	1272.8	P	1391.5	P	1075	P	1407.7	P	1178.3	P	E. coli /GEN=bioB /DB_XREF=gb:J04423.1 /NOTE=SIF corresponding to nucleotides 2071-2304 of gb:J04423.1 /DEF=E.coli 7,8-diamino-pelargonic acid (bioA), biotin synthetase (bioB), 7-keto-8-amino-pelargonic acid synthetase (bioF), bioC protein, and dethiobiotin synthetase (bioD), complete cds.
AFFX-r2-Ec-bioB-M_at	2124.7	P	2006.3	P	1827.2	P	1621.8	P	1956.6	P	1638.6	P	1926.6	P	2043.6	P	2065	P	1459.3	P	1753.9	P	1802	P	E. coli /GEN=bioB /DB_XREF=gb:J04423.1 /NOTE=SIF corresponding to nucleotides 2393-2682 of gb:J04423.1 /DEF=E.coli 7,8-diamino-pelargonic acid (bioA), biotin synthetase (bioB), 7-keto-8-amino-pelargonic acid synthetase (bioF), bioC protein, and dethiobiotin synthetase (bioD), complete cds.
AFFX-r2-Ec-bioC-3_at	4950.7	P	4254.3	P	4436.3	P	3535.3	P	4214.8	P	4046.8	P	4786.4	P	4258.2	P	4067.7	P	3464.6	P	4268.7	P	3947.1	P	E. coli /GEN=bioC /DB_XREF=gb:J04423.1 /NOTE=SIF corresponding to nucleotides 4608-4883 of gb:J04423.1 /DEF=E.coli 7,8-diamino-pelargonic acid (bioA), biotin synthetase (bioB), 7-keto-8-amino-pelargonic acid synthetase (bioF), bioC protein, and dethiobiotin synthetase (bioD), complete cds.
AFFX-r2-Ec-bioC-5_at	3981.5	P	3602.5	P	3544.4	P	2718.5	P	3273.6	P	2718.2	P	3550.6	P	3222.7	P	3438.7	P	3224.8	P	3241.2	P	2930.7	P	E. coli /GEN=bioC /DB_XREF=gb:J04423.1 /NOTE=SIF corresponding to nucleotides 4257-4573 of gb:J04423.1 /DEF=E.coli 7,8-diamino-pelargonic acid (bioA), biotin synthetase (bioB), 7-keto-8-amino-pelargonic acid synthetase (bioF), bioC protein, and dethiobiotin synthetase (bioD), complete cds.
AFFX-r2-Ec-bioD-3_at	20128.7	P	19830.2	P	22077.3	P	19864.5	P	23095.4	P	25995.2	P	18983.6	P	19144.4	P	21217.4	P	15680.5	P	17866.9	P	16896.6	P	E. coli /GEN=bioD /DB_XREF=gb:J04423.1 /NOTE=SIF corresponding to nucleotides 5312-5559 of gb:J04423.1, not 100% identical /DEF=E.coli 7,8-diamino-pelargonic acid (bioA), biotin synthetase (bioB), 7-keto-8-amino-pelargonic acid synthetase (bioF), bioC protein, and dethiobiotin synthetase (bioD), complete cds.
AFFX-r2-Ec-bioD-5_at	17407.5	P	14831	P	17247.6	P	14875.4	P	16517.3	P	15903.4	P	15651.1	P	15490.2	P	14773.4	P	12508.7	P	15088.8	P	12822.1	P	E. coli /GEN=bioD /DB_XREF=gb:J04423.1 /NOTE=SIF corresponding to nucleotides 5024-5244 of gb:J04423.1 /DEF=E.coli 7,8-diamino-pelargonic acid (bioA), biotin synthetase (bioB), 7-keto-8-amino-pelargonic acid synthetase (bioF), bioC protein, and dethiobiotin synthetase (bioD), complete cds.
AFFX-r2-P1-cre-3_at	84627.1	P	71136.7	P	85701.5	P	74641	P	90210	P	77688.4	P	69506	P	69333.4	P	70450.7	P	60375.5	P	63306.9	P	54583	P	Bacteriophage P1 /GEN=cre /DB_XREF=gb:X03453.1 /NOTE=SIF corresponding to nucleotides 1032-1270 of gb:X03453.1 /DEF=Bacteriophage P1 cre gene for recombinase protein.
AFFX-r2-P1-cre-5_at	70687.5	P	58614.5	P	74547.1	P	65236	P	88517.2	P	66658.2	P	62670.2	P	61166.9	P	57831.6	P	50239.5	P	52980.7	P	43157.9	P	Bacteriophage P1 /GEN=cre /DB_XREF=gb:X03453.1 /NOTE=SIF corresponding to nucleotides 581-1001 of gb:X03453.1 /DEF=Bacteriophage P1 cre gene for recombinase protein.
AFFX-ThrX-3_at	16.6	A	26.1	A	20.6	A	6.3	A	16.8	A	21.5	A	46.4	A	9.9	A	28.4	A	7.9	A	16.3	A	11.4	A	B. subtilis /GEN=thrB /DB_XREF=gb:X04603.1 /NOTE=SIF corresponding to nucleotides 1689-2151 of gb:X04603.1 /DEF=B. subtilis thrB and thrC genes for homoserine kinase and threonine synthase (EC 2.7.1.39 and EC 4.2.99.2, respectively).
AFFX-ThrX-5_at	11.9	A	9.5	A	5.1	A	7.3	A	13.8	A	6.7	A	43.3	A	18.9	A	47.9	A	13.3	A	21.7	A	11.5	A	B. subtilis /GEN=thrC /DB_XREF=gb:X04603.1 /NOTE=SIF corresponding to nucleotides 288-932 of gb:X04603.1 /DEF=B. subtilis thrB and thrC genes for homoserine kinase and threonine synthase (EC 2.7.1.39 and EC 4.2.99.2, respectively).
AFFX-ThrX-M_at	74	A	8.9	A	33.3	A	8.5	A	6.1	A	3.7	A	79.3	A	33.3	A	6.2	A	17.9	A	32.3	A	6.8	A	B. subtilis /GEN=thrC, thrB /DB_XREF=gb:X04603.1 /NOTE=SIF corresponding to nucleotides 995-1562 of gb:X04603.1, not 100% identical /DEF=B. subtilis thrB and thrC genes for homoserine kinase and threonine synthase (EC 2.7.1.39 and EC 4.2.99.2, respectively).
AFFX-TrpnX-3_at	16.1	A	9.6	A	6.9	A	21.4	A	6	A	9.2	A	11.6	A	29.6	A	52.2	A	39.5	A	3.9	A	18.3	A	B. subtilis /GEN=trpC, trpF /DB_XREF=gb:K01391.1 /NOTE=SIF corresponding to nucleotides 3790-4368 of gb:K01391.1, not 100% identical /DEF=B.subtilis tryptophan (trp) operon, complete cds.
AFFX-TrpnX-5_at	49.2	A	47.9	A	11.1	A	25.9	A	8.5	A	11.3	A	35.2	A	26.5	A	11.4	A	9.4	A	9.9	A	35.6	A	B. subtilis /GEN=trpE, trpD /DB_XREF=gb:K01391.1 /NOTE=SIF corresponding to nucleotides 1953-2483 of gb:K01391.1, not 100% identical /DEF=B.subtilis tryptophan (trp) operon, complete cds.
AFFX-TrpnX-M_at	8.9	A	6.1	A	58.9	A	10.7	A	10	A	18.7	A	26.1	A	6.9	A	14.9	A	4.1	A	14.8	A	9.6	A	B. subtilis /GEN=trpD, trpC /DB_XREF=gb:K01391.1 /NOTE=SIF corresponding to nucleotides 2880-3359 of gb:K01391.1, not 100% identical /DEF=B.subtilis tryptophan (trp) operon, complete cds.
1552327_at	127	A	7.7	A	5.1	A	56.7	A	80.3	A	9.4	A	53.6	A	7.5	A	115.1	A	61.5	A	5.2	A	93.5	A	gb:NM_152583.1 /DB_XREF=gi:22749204 /TID=Hs2.399873.1 /CNT=11 /FEA=FLmRNA /TIER=FL+Stack /STK=8 /LL=158947 /UG_GENE=MGC40053 /UG=Hs.399873 /UG_TITLE=hypothetical protein MGC40053 /DEF=Homo sapiens hypothetical protein MGC40053 (MGC40053), mRNA. /FL=gb:NM_152583.1
1552329_at	352.1	P	320.8	P	410.8	P	102	P	177.5	P	189.4	P	425.6	P	77.4	M	195.7	P	115.5	M	198.4	P	170.8	P	gb:BC029352.1 /DB_XREF=gi:20810414 /TID=Hs2.374853.1 /CNT=35 /FEA=FLmRNA /TIER=FL /STK=7 /LL=283886 /UG_GENE=MY038 /UG=Hs.374853 /DEF=Homo sapiens, hypothetical brain protein my038, clone MGC:32516 IMAGE:4593989, mRNA, complete cds. /PROD=hypothetical brain protein my038 /FL=gb:NM_032626.2 gb:BC029352.1
1552330_at	576.7	P	477	P	346.2	P	595.5	P	704.9	P	519.5	P	964.8	P	458.1	P	778.7	P	339.9	P	788.6	P	586.8	P	gb:NM_145039.1 /DB_XREF=gi:21450791 /TID=Hs2.114318.1 /CNT=37 /FEA=FLmRNA /TIER=FL /STK=7 /LL=92806 /UG_GENE=MGC16385 /UG=Hs.114318 /UG_TITLE=hypothetical protein MGC16385 /DEF=Homo sapiens hypothetical protein MGC16385 (MGC16385), mRNA. /FL=gb:NM_145039.1 gb:BC009263.1
1552332_at	88.5	A	82.9	A	64.4	A	474	A	135	A	68.3	A	172.4	A	77.8	A	468.4	A	83.1	A	72.8	A	621.6	A	gb:NM_138632.1 /DB_XREF=gi:20336762 /GEN=HRIHFB2122 /TID=Hs2.40342.1 /CNT=22 /FEA=FLmRNA /TIER=FL /STK=7 /LL=11078 /UG=Hs.40342 /DEF=Homo sapiens Tara-like protein (HRIHFB2122), transcript variant 2, mRNA. /PROD=Tara-like protein isoform 2 /FL=gb:NM_138632.1
1552334_at	130.5	M	252.7	A	180.2	M	560.8	P	461.5	P	254	A	277.8	A	259.7	P	483.4	P	462.5	P	172.1	A	553.7	P	gb:BG571343 /DB_XREF=gi:13578996 /DB_XREF=602592611F1 /CLONE=IMAGE:4720106 /TID=Hs2.40342.1 /CNT=22 /FEA=FLmRNA /TIER=ConsEnd /STK=0 /LL=11078 /UG_GENE=HRIHFB2122 /UG=Hs.40342 /UG_TITLE=Tara-like protein /FL=gb:NM_138632.1
1552335_at	56.4	A	102.6	A	27.5	A	1016	P	263.9	A	207.4	A	42.8	A	155.1	A	135.7	A	247.7	A	103.6	A	170.3	A	gb:NM_053054.2 /DB_XREF=gi:26051219 /GEN=CATSPER1 /TID=Hs2.189105.1 /CNT=14 /FEA=FLmRNA /TIER=FL /STK=7 /LL=117144 /UG=Hs.189105 /DEF=Homo sapiens cation channel, sperm associated 1 (CATSPER1), mRNA. /PROD=sperm-associated cation channel 1 /FL=gb:BC032950.1 gb:AF407333.1 gb:NM_053054.2 gb:BC036522.1
1552337_s_at	102.4	A	126.7	A	76.8	A	149.9	A	241.3	A	213.8	A	35.8	A	125.7	A	188.2	A	128	A	145.7	A	162.1	A	gb:NM_014621.2 /DB_XREF=gi:23397671 /GEN=HOXD4 /TID=Hs2.278255.1 /CNT=9 /FEA=FLmRNA /TIER=FL /STK=7 /LL=3233 /UG=Hs.278255 /DEF=Homo sapiens homeo box D4 (HOXD4), mRNA. /PROD=homeo box D4 /FL=gb:NM_014621.2 gb:BC016763.1
1552338_at	8.6	A	8.4	A	6.1	A	4.9	A	17.6	A	9.3	A	30.2	A	5.2	A	7.7	A	7.1	A	8.5	A	8.6	A	gb:AY177407.1 /DB_XREF=gi:27728743 /TID=Hs2.437095.1 /CNT=8 /FEA=FLmRNA /TIER=FL /STK=7 /LL=145258 /UG_GENE=GSC /UG=Hs.437095 /DEF=Homo sapiens homeobox protein goosecoid mRNA, complete cds. /PROD=homeobox protein goosecoid /FL=gb:AY177407.1 gb:NM_173849.1
1552340_at	29.7	A	16.5	A	12.7	A	52.3	A	14.5	A	26.8	A	49.2	A	24	A	19.2	A	18.5	A	58.9	A	16.4	A	gb:NM_152860.1 /DB_XREF=gi:22902135 /GEN=SP7 /TID=Hs2.209402.1 /CNT=7 /FEA=FLmRNA /TIER=FL /STK=7 /LL=121340 /UG=Hs.209402 /DEF=Homo sapiens Sp7 transcription factor (SP7), mRNA. /PROD=osterix /FL=gb:NM_152860.1 gb:AF477981.1
1552343_s_at	14	A	12.3	A	10.8	A	6.2	A	13.4	A	38.2	A	35.7	A	32.8	A	54.3	A	49.6	A	5.5	A	48	A	gb:NM_002604.1 /DB_XREF=gi:24429563 /GEN=PDE7A /TID=Hs2.406325.1 /CNT=30 /FEA=FLmRNA /TIER=FL /STK=6 /LL=5150 /UG=Hs.406325 /DEF=Homo sapiens phosphodiesterase 7A (PDE7A), transcript variant 2, mRNA. /PROD=phosphodiesterase 7A isoform b /FL=gb:NM_002604.1 gb:AF332652.1
1552344_s_at	495.8	P	516.3	P	265.6	P	757.1	P	578.1	P	377.6	P	573.7	P	244	P	444.5	P	387.6	P	280.3	P	291.7	P	gb:NM_054026.1 /DB_XREF=gi:17978499 /GEN=CNOT7 /TID=Hs2.380963.2 /CNT=53 /FEA=FLmRNA /TIER=FL /STK=6 /LL=29883 /UG=Hs.380963 /DEF=Homo sapiens CCR4-NOT transcription complex, subunit 7 (CNOT7), transcript variant 2, mRNA. /PROD=CCR4-NOT transcription complex, subunit 7,isoform 2 /FL=gb:NM_054026.1
1552347_at	288.9	P	229.4	P	277.3	P	318.7	P	321.6	P	124.4	P	312.8	P	235.2	P	250.1	P	376.4	P	254.8	P	380.7	P	gb:NM_145311.1 /DB_XREF=gi:22202613 /GEN=CRYZL1 /TID=Hs2.330208.1 /CNT=19 /FEA=FLmRNA /TIER=FL /STK=6 /LL=9946 /UG=Hs.330208 /DEF=Homo sapiens crystallin, zeta (quinone reductase)-like 1 (CRYZL1), transcript variant 2, mRNA. /PROD=crystallin, zeta-like 1 isoform b /FL=gb:NM_145311.1
1552348_at	147.5	A	228.2	A	1171	P	149.2	A	107.7	A	354.4	A	373.2	A	95.4	A	450.8	A	3895.7	P	335	A	2145.3	P	gb:NM_152891.1 /DB_XREF=gi:23097243 /GEN=EOS /TID=Hs2.280658.1 /CNT=19 /FEA=FLmRNA /TIER=FL /STK=6 /LL=260429 /UG=Hs.280658 /DEF=Homo sapiens serine protease EOS (EOS), mRNA. /PROD=serine protease EOS /FL=gb:NM_152891.1 gb:AF536382.1
1552349_a_at	10.5	A	37.2	A	380.7	P	73.7	A	120.6	A	181.3	A	122.8	A	84.8	A	174.9	A	2446.3	P	24.9	A	922.9	P	gb:NM_152891.1 /DB_XREF=gi:23097243 /GEN=EOS /TID=Hs2.280658.1 /CNT=19 /FEA=FLmRNA /TIER=FL /STK=6 /LL=260429 /UG=Hs.280658 /DEF=Homo sapiens serine protease EOS (EOS), mRNA. /PROD=serine protease EOS /FL=gb:NM_152891.1 gb:AF536382.1
1552354_at	16.9	A	23.3	A	20.7	A	19.4	A	22.6	A	28.2	A	66.1	A	18.8	A	10.5	A	21	A	23.3	A	27.6	A	gb:NM_152769.1 /DB_XREF=gi:22749502 /TID=Hs2.346575.1 /CNT=13 /FEA=FLmRNA /TIER=FL /STK=6 /LL=255057 /UG_GENE=MGC40084 /UG=Hs.346575 /UG_TITLE=hypothetical protein MGC40084 /DEF=Homo sapiens hypothetical protein MGC40084 (MGC40084), mRNA. /FL=gb:NM_152769.1 gb:BC028156.1
1552355_s_at	37.2	A	24.6	A	87.8	A	19.6	A	25.3	A	28.1	A	39.9	A	15.3	A	11	A	27.7	A	29.2	A	20.7	A	gb:NM_152769.1 /DB_XREF=gi:22749502 /TID=Hs2.346575.1 /CNT=13 /FEA=FLmRNA /TIER=FL /STK=6 /LL=255057 /UG_GENE=MGC40084 /UG=Hs.346575 /UG_TITLE=hypothetical protein MGC40084 /DEF=Homo sapiens hypothetical protein MGC40084 (MGC40084), mRNA. /FL=gb:NM_152769.1 gb:BC028156.1
1552359_at	35.7	A	6.9	A	63.6	P	1.5	A	35.2	A	9.1	A	27.1	A	6.1	A	3.7	A	16.4	A	78	A	57	A	gb:AL833526.1 /DB_XREF=gi:21734170 /TID=Hs2.432512.1 /CNT=10 /FEA=FLmRNA /TIER=ConsEnd /STK=0 /LL=157777 /UG_GENE=FLJ25692 /UG=Hs.432512 /UG_TITLE=hypothetical protein FLJ25692 /DEF=Homo sapiens mRNA; cDNA DKFZp686J2237 (from clone DKFZp686J2237). /FL=gb:NM_173518.1
1552360_a_at	242.1	A	144.8	A	178.4	A	118	A	77.3	A	159.1	A	234.5	A	119	A	133.1	A	127.5	A	101.6	A	145.8	P	gb:NM_052887.2 /DB_XREF=gi:22547217 /GEN=TIRAP /TID=Hs2.17681.1 /CNT=48 /FEA=FLmRNA /TIER=FL /STK=5 /LL=114609 /UG=Hs.17681 /DEF=Homo sapiens Toll-interleukin 1 receptor (TIR) domain-containing adapter protein (TIRAP), transcript variant 1, mRNA. /PROD=Toll-interleukin 1 receptor (TIR)domain-containing adapter protein isoform a /FL=gb:AF410783.1 gb:NM_052887.2
1552362_a_at	152.3	A	93.9	A	71.5	A	164.1	P	107.7	A	115	A	266.6	A	123.3	A	100.9	A	146.8	P	205.2	P	88.7	A	gb:NM_052971.1 /DB_XREF=gi:16418464 /GEN=LEAP-2 /TID=Hs2.337588.1 /CNT=24 /FEA=FLmRNA /TIER=FL /STK=5 /LL=116842 /UG=Hs.337588 /DEF=Homo sapiens liver-expressed antimicrobial peptide 2 (LEAP-2), mRNA. /PROD=liver-expressed antimicrobial peptide 2precursor /FL=gb:NM_052971.1
1552364_s_at	358.1	P	299.9	P	643.3	P	89.7	A	742.9	P	382.2	P	415.6	P	305.5	P	281.8	A	545.5	P	496.2	P	480	P	gb:BC001526.1 /DB_XREF=gi:16306701 /TID=Hs2.103512.1 /CNT=32 /FEA=FLmRNA /TIER=FL /STK=5 /LL=124540 /UG_GENE=MSI2 /UG=Hs.103512 /DEF=Homo sapiens, clone MGC:3245 IMAGE:3505639, mRNA, complete cds. /PROD=Unknown (protein for MGC:3245) /FL=gb:NM_138962.2 gb:BC001526.1
1552365_at	154.2	P	50.8	P	18.2	A	1.3	A	2.3	A	4.2	A	42.3	A	47.5	A	16.6	A	3	A	867.8	P	8.7	A	gb:NM_033128.1 /DB_XREF=gi:14916472 /GEN=SCIN /TID=Hs2.210473.1 /CNT=44 /FEA=FLmRNA /TIER=FL /STK=5 /LL=85477 /UG=Hs.210473 /DEF=Homo sapiens scinderin (SCIN), mRNA. /PROD=scinderin /FL=gb:NM_033128.1 gb:AF276507.1 gb:BC021090.1
1552367_a_at	125.3	A	13.4	A	4.9	A	3.8	A	11.1	A	11.7	A	32.6	A	2.6	A	11.1	A	11.9	A	413.9	P	5.2	A	gb:AF276507.1 /DB_XREF=gi:14331130 /TID=Hs2.210473.1 /CNT=44 /FEA=FLmRNA /TIER=FL /STK=2 /LL=85477 /UG_GENE=SCIN /UG=Hs.210473 /DEF=Homo sapiens scinderin mRNA, complete cds. /PROD=scinderin /FL=gb:NM_033128.1 gb:AF276507.1 gb:BC021090.1
1552368_at	66.8	A	30.9	A	34	A	5.3	A	13.1	A	5.5	A	45.9	A	47.5	A	12.7	A	42.7	A	132.8	P	48.1	A	gb:NM_080618.1 /DB_XREF=gi:27501459 /GEN=CTCFL /TID=Hs2.131543.1 /CNT=33 /FEA=FLmRNA /TIER=FL /STK=5 /LL=140690 /UG=Hs.131543 /DEF=Homo sapiens CCCTC-binding factor (zinc finger protein)-like (CTCFL), mRNA. /PROD=CCCTC-binding factor (zinc finger protein)-like /FL=gb:AF336042.1 gb:NM_080618.1 gb:AY071919.1
1552370_at	461.6	P	445.8	P	180.1	P	153.7	P	295.1	P	56.5	A	222.1	A	183.9	P	256.4	P	68.7	A	139.3	P	97	P	gb:NM_173487.1 /DB_XREF=gi:27735074 /TID=Hs2.128777.1 /CNT=35 /FEA=FLmRNA /TIER=FL /STK=5 /LL=132321 /UG_GENE=LOC132321 /UG=Hs.128777 /UG_TITLE=hypothetical protein LOC132321 /DEF=Homo sapiens hypothetical protein LOC132321 (LOC132321), mRNA. /FL=gb:BC032582.1 gb:NM_173487.1
1552372_at	9.5	A	10.5	A	5.8	A	1.4	A	38.4	A	13.1	A	8.9	A	1	A	14.9	A	2.3	A	21.7	A	3.1	A	gb:BC016358.1 /DB_XREF=gi:18921427 /TID=Hs2.128777.1 /CNT=35 /FEA=FLmRNA /TIER=ConsEnd /STK=0 /LL=132321 /UG_GENE=LOC132321 /UG=Hs.128777 /UG_TITLE=hypothetical protein LOC132321 /DEF=Homo sapiens, clone IMAGE:4095238, mRNA. /FL=gb:BC032582.1 gb:NM_173487.1
1552373_s_at	55	P	29.6	A	6	A	7.2	A	31.1	A	7.8	A	16.9	A	1.7	A	25.4	A	4.8	A	32.8	A	45.3	A	gb:BC016358.1 /DB_XREF=gi:18921427 /TID=Hs2.128777.1 /CNT=35 /FEA=FLmRNA /TIER=ConsEnd /STK=0 /LL=132321 /UG_GENE=LOC132321 /UG=Hs.128777 /UG_TITLE=hypothetical protein LOC132321 /DEF=Homo sapiens, clone IMAGE:4095238, mRNA. /FL=gb:BC032582.1 gb:NM_173487.1
1552375_at	164.4	P	52.6	A	72.4	P	111.3	P	114.3	A	115.1	M	65.7	A	71.4	A	76.1	A	201.3	P	65	A	110.5	P	gb:NM_032433.1 /DB_XREF=gi:20336723 /GEN=ZNF333 /TID=Hs2.204529.1 /CNT=21 /FEA=FLmRNA /TIER=FL /STK=5 /LL=84449 /UG=Hs.204529 /DEF=Homo sapiens zinc finger protein 333 (ZNF333), mRNA. /PROD=zinc finger protein 333 /FL=gb:NM_032433.1 gb:AF372702.1
1552377_s_at	406.6	A	97.3	A	313.6	A	478.7	A	729.4	M	474.3	A	347.7	A	408.7	A	275.9	A	548.2	A	365.5	A	536.5	A	gb:NM_145301.1 /DB_XREF=gi:21945057 /TID=Hs2.406737.1 /CNT=15 /FEA=FLmRNA /TIER=FL /STK=5 /LL=201158 /UG_GENE=LOC201158 /UG=Hs.406737 /UG_TITLE=similar to CGI-148 protein /DEF=Homo sapiens similar to CGI-148 protein (LOC201158), mRNA. /FL=gb:BC011952.1 gb:NM_145301.1
1552378_s_at	131.9	P	100.9	A	86.3	A	101.5	P	199.4	P	90.9	A	114.9	A	77.9	A	94.1	P	56.6	A	93.9	A	82.9	A	gb:NM_172037.1 /DB_XREF=gi:25282468 /GEN=RDH10 /TID=Hs2.432987.1 /CNT=30 /FEA=FLmRNA /TIER=FL /STK=5 /LL=157506 /UG=Hs.432987 /DEF=Homo sapiens retinol dehydrogenase 10 (all-trans) (RDH10), mRNA. /PROD=retinol dehydrogenase 10 /FL=gb:NM_172037.1 gb:AF456765.1
1552379_at	64.4	A	2.3	A	12.8	A	17.8	A	3.7	A	43.9	A	24.5	A	6.7	A	14.2	A	55.4	A	25.3	A	1.6	A	gb:BG677577 /DB_XREF=gi:13908974 /DB_XREF=602624130F1 /CLONE=IMAGE:4749078 /TID=Hs2.432987.1 /CNT=30 /FEA=FLmRNA /TIER=ConsEnd /STK=0 /LL=157506 /UG_GENE=RDH10 /UG=Hs.432987 /UG_TITLE=retinol dehydrogenase 10 (all-trans) /FL=gb:NM_172037.1 gb:AF456765.1
1552381_at	48.2	A	65.8	A	73.9	A	3.7	A	23.6	A	2.9	A	145.9	A	1.9	A	4.5	A	153.5	M	92.7	A	68.5	A	gb:NM_080743.2 /DB_XREF=gi:21361782 /GEN=SRrp35 /TID=Hs2.254414.1 /CNT=14 /FEA=FLmRNA /TIER=FL /STK=5 /LL=135295 /UG=Hs.254414 /DEF=Homo sapiens serine-arginine repressor protein (35 kDa) (SRrp35), mRNA. /PROD=serine-arginine repressor protein (35 kDa) /FL=gb:NM_080743.2 gb:BC021715.1 gb:AF449428.1
1552383_at	143.1	A	72.3	A	96.3	A	15.4	A	80.4	A	156.6	A	94.6	A	60.6	A	194.6	A	41.2	A	88.7	A	183.3	A	gb:NM_153606.1 /DB_XREF=gi:23957695 /TID=Hs2.129293.1 /CNT=16 /FEA=FLmRNA /TIER=FL /STK=5 /LL=149647 /UG_GENE=FLJ32796 /UG=Hs.129293 /UG_TITLE=hypothetical protein FLJ32796 /DEF=Homo sapiens hypothetical protein FLJ32796 (FLJ32796), mRNA. /FL=gb:BC035007.1 gb:NM_153606.1
1552384_a_at	28.8	A	22.4	A	18.9	A	45.6	A	18.2	A	45.2	A	30.4	A	28.1	A	112	A	71.1	A	12.6	A	70.9	A	gb:NM_153606.1 /DB_XREF=gi:23957695 /TID=Hs2.129293.1 /CNT=16 /FEA=FLmRNA /TIER=FL /STK=5 /LL=149647 /UG_GENE=FLJ32796 /UG=Hs.129293 /UG_TITLE=hypothetical protein FLJ32796 /DEF=Homo sapiens hypothetical protein FLJ32796 (FLJ32796), mRNA. /FL=gb:BC035007.1 gb:NM_153606.1
1552386_at	3.7	A	74.1	P	21	A	41.3	A	41.6	A	47.3	A	107.5	A	35.9	A	20.2	A	44.1	A	31.2	A	11.7	A	gb:NM_152687.1 /DB_XREF=gi:22749378 /TID=Hs2.298674.1 /CNT=18 /FEA=FLmRNA /TIER=FL /STK=5 /LL=202309 /UG_GENE=FLJ33641 /UG=Hs.298674 /UG_TITLE=hypothetical protein FLJ33641 /DEF=Homo sapiens hypothetical protein FLJ33641 (FLJ33641), mRNA. /FL=gb:NM_152687.1
1552388_at	45.1	A	82.6	A	31.6	A	39.6	A	265.2	A	74.2	A	45.6	A	39.8	A	37	A	48.2	A	34.7	A	51.4	A	gb:NM_152514.1 /DB_XREF=gi:22749074 /TID=Hs2.350773.1 /CNT=11 /FEA=FLmRNA /TIER=FL /STK=5 /LL=150378 /UG_GENE=FLJ30901 /UG=Hs.350773 /UG_TITLE=hypothetical protein FLJ30901 /DEF=Homo sapiens hypothetical protein FLJ30901 (FLJ30901), mRNA. /FL=gb:NM_152514.1
1552389_at	41.5	A	28.1	A	6.5	A	4.2	A	7.1	A	25.6	A	12.9	A	19.5	A	16.9	A	17.1	A	4.7	A	32.4	A	gb:NM_173549.1 /DB_XREF=gi:27734896 /TID=Hs2.171455.1 /CNT=12 /FEA=FLmRNA /TIER=FL /STK=5 /LL=203111 /UG_GENE=FLJ39553 /UG=Hs.171455 /UG_TITLE=hypothetical protein FLJ39553 /DEF=Homo sapiens hypothetical protein FLJ39553 (FLJ39553), mRNA. /FL=gb:NM_173549.1
1552390_a_at	2.8	A	19.9	A	26.9	A	19.3	A	31.5	A	24.2	A	93.2	A	3.1	A	10.9	A	17.5	A	5.8	A	11.2	A	gb:NM_173549.1 /DB_XREF=gi:27734896 /TID=Hs2.171455.1 /CNT=12 /FEA=FLmRNA /TIER=FL /STK=5 /LL=203111 /UG_GENE=FLJ39553 /UG=Hs.171455 /UG_TITLE=hypothetical protein FLJ39553 /DEF=Homo sapiens hypothetical protein FLJ39553 (FLJ39553), mRNA. /FL=gb:NM_173549.1
1552391_at	79.6	A	15.6	A	6.2	A	24.8	A	30.4	A	57.6	A	17.1	A	49.6	A	56.4	A	109.6	A	115.6	A	99.2	A	gb:NM_152610.1 /DB_XREF=gi:22749248 /TID=Hs2.192090.1 /CNT=9 /FEA=FLmRNA /TIER=FL /STK=5 /LL=164127 /UG_GENE=FLJ35728 /UG=Hs.192090 /UG_TITLE=hypothetical protein FLJ35728 /DEF=Homo sapiens hypothetical protein FLJ35728 (FLJ35728), mRNA. /FL=gb:BC031066.1 gb:BC030026.1 gb:NM_152610.1
1552393_at	76.7	P	3.7	A	19	A	27.8	A	3.5	A	9.8	A	20.4	A	1037.4	P	3.2	A	27.3	A	394.7	P	39.1	A	gb:NM_152512.1 /DB_XREF=gi:22749070 /TID=Hs2.149091.1 /CNT=8 /FEA=FLmRNA /TIER=FL /STK=5 /LL=150350 /UG_GENE=FLJ25421 /UG=Hs.149091 /UG_TITLE=hypothetical protein FLJ25421 /DEF=Homo sapiens hypothetical protein FLJ25421 (FLJ25421), mRNA. /FL=gb:BC033895.1 gb:NM_152512.1
1552394_a_at	94.9	A	48.2	A	32	A	6.5	A	47.6	A	26.9	A	68.1	A	1894.7	P	60.8	A	2.3	A	617.1	P	65.4	A	gb:NM_152512.1 /DB_XREF=gi:22749070 /TID=Hs2.149091.1 /CNT=8 /FEA=FLmRNA /TIER=FL /STK=5 /LL=150350 /UG_GENE=FLJ25421 /UG=Hs.149091 /UG_TITLE=hypothetical protein FLJ25421 /DEF=Homo sapiens hypothetical protein FLJ25421 (FLJ25421), mRNA. /FL=gb:BC033895.1 gb:NM_152512.1
1552395_at	102.1	A	119	A	72.7	A	24.1	A	63.8	A	71.4	A	52	A	81.2	A	28.3	A	35	A	52.9	A	47.1	A	gb:NM_052841.2 /DB_XREF=gi:17017992 /GEN=STK22C /TID=Hs2.379372.1 /CNT=8 /FEA=FLmRNA /TIER=FL /STK=5 /LL=81629 /UG=Hs.379372 /DEF=Homo sapiens serinethreonine kinase 22C (spermiogenesis associated) (STK22C), mRNA. /PROD=testis-specific serinethreonine kinase 22C /FL=gb:NM_052841.2 gb:AF296450.1 gb:BC035354.1
1552396_at	116.9	A	150.3	A	10.2	A	124.9	A	109.8	A	76.4	A	118.8	A	14.9	A	153.7	A	15	A	93.6	A	155.5	A	gb:NM_080827.1 /DB_XREF=gi:22779935 /GEN=WFDC6 /TID=Hs2.274876.1 /CNT=7 /FEA=FLmRNA /TIER=FL /STK=5 /LL=140870 /UG=Hs.274876 /DEF=Homo sapiens WAP four-disulfide core domain 6 (WFDC6), mRNA. /PROD=probable protease inhibitor WAP6 /FL=gb:NM_080827.1 gb:AF411861.1
1552398_a_at	14	A	25.8	A	41.4	A	53.2	A	54.6	A	56.1	A	45.5	A	26.7	A	14.2	A	7.4	A	60.1	A	48.1	A	gb:NM_138337.1 /DB_XREF=gi:19923884 /GEN=CLL-1 /TID=Hs2.133456.1 /CNT=10 /FEA=FLmRNA /TIER=FL /STK=5 /LL=160364 /UG=Hs.133456 /DEF=Homo sapiens C-type lectin protein CLL-1 (CLL-1), mRNA. /PROD=C-type lectin protein CLL-1 /FL=gb:AF247788.1 gb:NM_138337.1
1552399_a_at	40.6	A	61.2	A	100.6	A	65.2	A	196.9	P	94	A	42.1	A	37.3	A	121	A	124.1	A	129.6	P	8.3	A	gb:NM_145696.1 /DB_XREF=gi:22035559 /GEN=BRF1 /TID=Hs2.32935.2 /CNT=7 /FEA=FLmRNA /TIER=FL /STK=5 /LL=2972 /UG=Hs.32935 /DEF=Homo sapiens BRF1 homolog, subunit of RNA polymerase III transcription initiation factor IIIB (S. cerevisiae) (BRF1), transcript variant 2, mRNA. /PROD=transcription initiation factor IIIB isoform 2 /FL=gb:NM_145696.1
1552400_a_at	150.4	A	116.3	A	121.2	A	87.8	A	24.3	A	43.7	A	198.7	A	42.4	A	62.9	A	78.5	A	118.9	M	131.9	M	gb:NM_152335.1 /DB_XREF=gi:22748730 /TID=Hs2.351693.1 /CNT=6 /FEA=FLmRNA /TIER=FL /STK=5 /LL=123591 /UG_GENE=FLJ38190 /UG=Hs.351693 /UG_TITLE=hypothetical protein FLJ38190 /DEF=Homo sapiens hypothetical protein FLJ38190 (FLJ38190), mRNA. /FL=gb:NM_152335.1
1552401_a_at	31.1	A	72	P	54.6	P	38.6	A	82.7	M	31.4	A	254.3	A	4.6	A	62.8	A	43.7	A	48.3	A	6.7	A	gb:NM_138332.1 /DB_XREF=gi:19923874 /TID=Hs2.278727.1 /CNT=6 /FEA=FLmRNA /TIER=FL /STK=5 /LL=54073 /UG_GENE=C21orf41 /UG=Hs.278727 /UG_TITLE=chromosome 21 open reading frame 41 /DEF=Homo sapiens chromosome 21 open reading frame 41 (C21orf41), mRNA. /FL=gb:NM_138332.1 gb:AY081145.1
1552402_at	82.4	A	18.8	A	12	A	44.1	A	25.5	A	13	A	49	A	38.7	A	142.2	A	12	A	53.8	A	9.3	A	gb:NM_138705.1 /DB_XREF=gi:20162573 /TID=Hs2.85902.1 /CNT=6 /FEA=FLmRNA /TIER=FL /STK=5 /LL=163688 /UG_GENE=LOC163688 /UG=Hs.85902 /UG_TITLE=calmodulin-like protein AF490905 /DEF=Homo sapiens calmodulin-like protein AF490905 (LOC163688), mRNA. /FL=gb:AF490905.1 gb:NM_138705.1
1552405_at	22.2	A	248.1	A	112.4	A	81.6	A	521.5	P	136.2	P	77.1	A	118.2	A	110.3	A	135.1	A	105.8	A	148.7	A	gb:NM_153447.1 /DB_XREF=gi:23592233 /GEN=MATER /TID=Hs2.356872.1 /CNT=5 /FEA=FLmRNA /TIER=FL /STK=5 /LL=126206 /UG=Hs.356872 /DEF=Homo sapiens maternal-antigen-that-embryos-require (MATER), mRNA. /PROD=maternal-antigen-that-embryos-require /FL=gb:NM_153447.1 gb:AY054986.1
1552408_at	81.6	A	11.3	A	36.6	A	28.9	A	46.3	A	48.3	A	84.3	A	65.6	A	75.9	A	84.9	A	53.7	A	52.9	A	gb:NM_153007.1 /DB_XREF=gi:23308594 /GEN=OPPO1 /TID=Hs2.186045.1 /CNT=5 /FEA=FLmRNA /TIER=FL /STK=5 /LL=146852 /UG=Hs.186045 /DEF=Homo sapiens OPPO 1 (OPPO1), mRNA. /PROD=OPPO 1 /FL=gb:NM_153007.1 gb:AB081120.1
1552409_a_at	38.9	A	137.4	A	20.5	A	13.8	A	90.3	A	19	A	249.7	A	51.1	A	53.4	A	89.5	A	56.7	A	38	A	gb:NM_153007.1 /DB_XREF=gi:23308594 /GEN=OPPO1 /TID=Hs2.186045.1 /CNT=5 /FEA=FLmRNA /TIER=FL /STK=5 /LL=146852 /UG=Hs.186045 /DEF=Homo sapiens OPPO 1 (OPPO1), mRNA. /PROD=OPPO 1 /FL=gb:NM_153007.1 gb:AB081120.1
1552410_at	179.5	A	225.9	A	151	A	122.2	P	157.6	A	229.4	P	168.9	A	199.5	P	167	M	252.2	P	246.4	A	128.6	A	gb:NM_173535.1 /DB_XREF=gi:27734932 /TID=Hs2.354972.1 /CNT=7 /FEA=FLmRNA /TIER=FL /STK=5 /LL=165530 /UG_GENE=FLJ39110 /UG=Hs.354972 /UG_TITLE=hypothetical protein FLJ39110 /DEF=Homo sapiens hypothetical protein FLJ39110 (FLJ39110), mRNA. /FL=gb:NM_173535.1
1552411_at	427.3	A	343	A	57	A	176.6	A	300.3	A	359.3	A	355.4	A	51.7	A	256	A	404.9	A	590.1	A	339.9	A	gb:NM_152251.1 /DB_XREF=gi:22748610 /GEN=DEFB106 /TID=Hs2.212261.1 /CNT=7 /FEA=FLmRNA /TIER=FL /STK=5 /LL=245909 /UG=Hs.212261 /DEF=Homo sapiens defensin, beta 106 (DEFB106), mRNA. /PROD=defensin, beta 106 /FL=gb:AB089181.1 gb:AY122466.1 gb:NM_152251.1
1552412_a_at	57.8	A	91.3	A	32.1	A	40.7	A	63.8	A	10	A	219.7	A	26	A	7.8	A	25.1	A	107.5	A	51.5	A	gb:NM_152251.1 /DB_XREF=gi:22748610 /GEN=DEFB106 /TID=Hs2.212261.1 /CNT=7 /FEA=FLmRNA /TIER=FL /STK=5 /LL=245909 /UG=Hs.212261 /DEF=Homo sapiens defensin, beta 106 (DEFB106), mRNA. /PROD=defensin, beta 106 /FL=gb:AB089181.1 gb:AY122466.1 gb:NM_152251.1
1552414_at	120	A	60.3	A	85	M	7.5	A	10	A	89.9	A	145.9	A	47.9	A	102.4	A	48	A	130.5	A	105.5	A	gb:NM_147198.2 /DB_XREF=gi:23238189 /GEN=WFDC9 /TID=Hs2.249828.1 /CNT=5 /FEA=FLmRNA /TIER=FL /STK=5 /LL=259240 /UG=Hs.249828 /DEF=Homo sapiens WAP four-disulfide core domain 9 (WFDC9), mRNA. /PROD=protease inhibitor WAP9 /FL=gb:AY047610.1 gb:NM_147198.2
1552415_a_at	192.1	A	187.5	A	66.8	A	70.8	A	30.9	A	127.9	A	86	A	81	A	169.3	A	217.2	A	28.5	A	176.3	A	gb:NM_147198.2 /DB_XREF=gi:23238189 /GEN=WFDC9 /TID=Hs2.249828.1 /CNT=5 /FEA=FLmRNA /TIER=FL /STK=5 /LL=259240 /UG=Hs.249828 /DEF=Homo sapiens WAP four-disulfide core domain 9 (WFDC9), mRNA. /PROD=protease inhibitor WAP9 /FL=gb:AY047610.1 gb:NM_147198.2
1552417_a_at	459.3	P	549.6	P	234.1	P	534.9	P	292.7	P	247.7	P	169	A	475.3	P	433.6	P	395.2	P	508.4	P	442.1	P	gb:NM_152905.1 /DB_XREF=gi:23097253 /GEN=NEDD1 /TID=Hs2.14456.1 /CNT=21 /FEA=FLmRNA /TIER=FL /STK=4 /LL=121441 /UG=Hs.14456 /DEF=Homo sapiens neural precursor cell expressed, developmentally down-regulated 1 (NEDD1), mRNA. /PROD=neural precursor cell expressed, developmentallydown-regulated 1 /FL=gb:BC027605.1 gb:NM_152905.1
1552418_at	30.1	A	14.9	A	17.1	A	9.3	A	25.3	A	8.8	A	61	A	16	A	19.9	A	90.1	A	11.8	A	27.9	A	gb:NM_153254.1 /DB_XREF=gi:23397543 /TID=Hs2.257170.1 /CNT=15 /FEA=FLmRNA /TIER=FL /STK=4 /LL=254173 /UG_GENE=FLJ36119 /UG=Hs.257170 /UG_TITLE=hypothetical protein FLJ36119 /DEF=Homo sapiens hypothetical protein FLJ36119 (FLJ36119), mRNA. /FL=gb:NM_153254.1
1552419_s_at	308.2	A	198.7	A	129.6	A	82.5	A	161.1	A	225.2	A	506.1	A	65.3	A	120.1	A	211.6	A	47.1	A	262.6	A	gb:NM_153254.1 /DB_XREF=gi:23397543 /TID=Hs2.257170.1 /CNT=15 /FEA=FLmRNA /TIER=FL /STK=4 /LL=254173 /UG_GENE=FLJ36119 /UG=Hs.257170 /UG_TITLE=hypothetical protein FLJ36119 /DEF=Homo sapiens hypothetical protein FLJ36119 (FLJ36119), mRNA. /FL=gb:NM_153254.1
1552421_a_at	79.6	A	5.5	A	14.1	A	12.1	A	28.4	A	61.9	A	27.3	A	28.8	A	20.1	A	7.9	A	47.4	A	15.9	A	gb:NM_145046.1 /DB_XREF=gi:21450803 /TID=Hs2.304020.1 /CNT=14 /FEA=FLmRNA /TIER=FL /STK=4 /LL=125972 /UG_GENE=CALR3 /UG=Hs.304020 /UG_TITLE=calreticulin 3 /DEF=Homo sapiens calreticulin 3 (CALR3), mRNA. /FL=gb:NM_145046.1 gb:BC014595.1
1552422_at	54.3	A	84	A	51.1	A	9.3	A	36.8	A	126.9	A	104.9	A	11.5	A	22.4	A	89.8	A	39.3	A	67.6	A	gb:NM_145022.1 /DB_XREF=gi:21450744 /TID=Hs2.194303.1 /CNT=18 /FEA=FLmRNA /TIER=FL /STK=4 /LL=220979 /UG_GENE=FLJ30567 /UG=Hs.194303 /UG_TITLE=hypothetical protein FLJ30567 /DEF=Homo sapiens hypothetical protein FLJ30567 (FLJ30567), mRNA. /FL=gb:NM_145022.1
1552423_at	169.8	P	219.6	P	97.5	A	94.4	P	253.9	P	149	P	327.3	P	225.8	P	172.8	P	203.4	P	209.9	P	154	P	gb:NM_005240.1 /DB_XREF=gi:20270187 /GEN=ETV3 /TID=Hs2.352672.1 /CNT=17 /FEA=FLmRNA /TIER=FL /STK=4 /LL=2117 /UG=Hs.352672 /DEF=Homo sapiens ets variant gene 3 (ETV3), mRNA. /PROD=ets variant gene 3 /FL=gb:BC022868.1 gb:AF218540.1 gb:NM_005240.1
1552424_at	52.9	A	6.8	A	5.4	A	12.8	A	43	A	8.2	A	17.5	A	12.3	A	5.8	A	19.2	A	4.8	A	4.8	A	gb:NM_152467.1 /DB_XREF=gi:22748976 /TID=Hs2.127510.1 /CNT=12 /FEA=FLmRNA /TIER=FL /STK=4 /LL=147086 /UG_GENE=FLJ32662 /UG=Hs.127510 /UG_TITLE=hypothetical protein FLJ32662 /DEF=Homo sapiens hypothetical protein FLJ32662 (FLJ32662), mRNA. /FL=gb:NM_152467.1
1552425_a_at	41.6	A	155.6	A	93.9	A	12	A	57.6	A	252.9	A	144	A	85.8	A	92.6	A	114.5	A	86.6	A	136.1	A	gb:NM_152467.1 /DB_XREF=gi:22748976 /TID=Hs2.127510.1 /CNT=12 /FEA=FLmRNA /TIER=FL /STK=4 /LL=147086 /UG_GENE=FLJ32662 /UG=Hs.127510 /UG_TITLE=hypothetical protein FLJ32662 /DEF=Homo sapiens hypothetical protein FLJ32662 (FLJ32662), mRNA. /FL=gb:NM_152467.1
1552426_a_at	2083.2	P	1933.8	P	2207.8	P	875.2	P	1409.9	P	1832.9	P	2291.2	P	1814.2	P	1223	P	1326.5	P	1908.1	P	1512.2	P	gb:NM_078474.1 /DB_XREF=gi:17865799 /GEN=BLP2 /TID=Hs2.288912.1 /CNT=11 /FEA=FLmRNA /TIER=FL /STK=4 /LL=80213 /UG=Hs.288912 /DEF=Homo sapiens BBP-like protein 2 (BLP2), transcript variant 1, mRNA. /PROD=BBP-like protein 2 isoform a /FL=gb:BC006150.1 gb:NM_078474.1
1552427_at	109.1	P	59.7	A	62.2	M	308.4	P	28.5	A	273.7	P	8.6	A	42.6	P	35.3	A	49.3	P	22.6	A	38.1	P	gb:NM_145312.1 /DB_XREF=gi:21945053 /TID=Hs2.147440.1 /CNT=13 /FEA=FLmRNA /TIER=FL /STK=4 /LL=220992 /UG_GENE=LOC220992 /UG=Hs.147440 /UG_TITLE=Zinc finger protein 93 (Zinc finger protein HTF34) /DEF=Homo sapiens Zinc finger protein 93 (Zinc finger protein HTF34) (LOC220992), mRNA. /FL=gb:NM_145312.1 gb:BC014161.1
1552430_at	61.5	A	58.9	A	21.8	A	57.7	P	61.5	A	114	P	50.8	A	60	P	94.6	P	53.1	A	95.5	P	33.9	A	gb:NM_170710.1 /DB_XREF=gi:24942128 /TID=Hs2.332256.1 /CNT=12 /FEA=FLmRNA /TIER=FL /STK=4 /LL=116966 /UG_GENE=WDR17 /UG=Hs.332256 /UG_TITLE=WD repeat domain 17 /DEF=Homo sapiens WD repeat domain 17 (WDR17), mRNA. /FL=gb:NM_170710.1 gb:AF492460.1
1552432_at	35.8	A	29.3	A	15.2	A	14.8	A	27.1	A	20.5	A	41.8	A	24.2	A	42.2	A	35.1	A	30.8	A	28.1	A	gb:BC040487.1 /DB_XREF=gi:26251734 /TID=Hs2.213603.1 /CNT=10 /FEA=FLmRNA /TIER=FL /STK=4 /LL=162387 /UG_GENE=FLJ35773 /UG=Hs.213603 /UG_TITLE=hypothetical protein FLJ35773 /DEF=Homo sapiens, hypothetical protein FLJ35773, clone MGC:33377 IMAGE:5272039, mRNA, complete cds. /FL=gb:BC040487.1 gb:NM_152599.1
1552436_a_at	85.1	A	19.6	A	7.8	A	5.7	A	19.3	A	34.6	A	32.5	A	11.3	A	15.6	A	48.5	A	58.3	A	3.4	A	gb:NM_052836.1 /DB_XREF=gi:16507963 /GEN=CDH23 /TID=Hs2.244343.2 /CNT=12 /FEA=FLmRNA /TIER=FL /STK=4 /LL=64072 /UG=Hs.244343 /DEF=Homo sapiens cadherin related 23 (CDH23), transcript variant 2, mRNA. /PROD=cadherin related 23, isoform 2 precursor /FL=gb:NM_052836.1
1552438_a_at	150.6	M	104.3	A	55.3	A	61.5	A	30	A	64.3	A	75.3	A	74.7	A	14.1	A	37.7	A	96.7	A	135.9	A	gb:NM_144708.1 /DB_XREF=gi:21389304 /TID=Hs2.99360.1 /CNT=7 /FEA=FLmRNA /TIER=FL /STK=4 /LL=150709 /UG_GENE=FLJ25415 /UG=Hs.99360 /UG_TITLE=hypothetical protein FLJ25415 /DEF=Homo sapiens hypothetical protein FLJ25415 (FLJ25415), mRNA. /FL=gb:NM_144708.1
1552439_s_at	8.7	A	8.6	A	36.4	A	4	A	6.3	A	5.5	A	14.5	A	3.5	A	10.7	A	3.5	A	1.4	A	3.5	A	gb:NM_032445.1 /DB_XREF=gi:14192940 /GEN=MEGF11 /TID=Hs2.248367.1 /CNT=9 /FEA=FLmRNA /TIER=FL /STK=4 /LL=84465 /UG=Hs.248367 /DEF=Homo sapiens MEGF11 protein (MEGF11), mRNA. /PROD=MEGF11 protein /FL=gb:NM_032445.1 gb:AB058677.1
1552440_at	72.2	A	135.4	A	50.2	A	111.6	M	9.7	A	43.6	A	26.3	A	83.2	A	118.2	A	12	A	89.7	A	108.7	A	gb:BC034761.1 /DB_XREF=gi:21961319 /TID=Hs2.16743.1 /CNT=9 /FEA=FLmRNA /TIER=FL /STK=4 /LL=11318 /UG_GENE=ADMR /UG=Hs.16743 /DEF=Homo sapiens, adrenomedullin receptor, clone MGC:34399 IMAGE:5185932, mRNA, complete cds. /PROD=adrenomedullin receptor /FL=gb:BC034761.1 gb:NM_007264.2
1552445_a_at	12.2	A	44.2	A	26.6	A	82.7	A	33.4	A	61.3	A	29.7	A	69.2	A	59.9	A	9	A	26.5	A	49.3	A	gb:NM_153448.1 /DB_XREF=gi:23592227 /GEN=ESX1L /TID=Hs2.223782.1 /CNT=7 /FEA=FLmRNA /TIER=FL /STK=4 /LL=80712 /UG=Hs.223782 /DEF=Homo sapiens extraembryonic, spermatogenesis, homeobox 1-like (ESX1L), mRNA. /PROD=extraembryonic, spermatogenesis, homeobox1-like /FL=gb:NM_153448.1 gb:AY114148.1
1552448_a_at	6.3	A	26.8	A	13.6	A	52.1	A	6.7	A	26	A	24.2	A	7.1	A	6.6	A	45.5	A	8.1	A	21.4	A	gb:NM_054017.2 /DB_XREF=gi:24475742 /GEN=C8orf12 /TID=Hs2.165742.1 /CNT=6 /FEA=FLmRNA /TIER=FL /STK=4 /LL=83656 /UG=Hs.165742 /DEF=Homo sapiens chromosome 8 open reading frame 12 (C8orf12), mRNA. /PROD=chromosome 8 open reading frame 12 /FL=gb:NM_054017.2
1552449_a_at	22.1	A	35.8	A	7	A	55.1	A	10.4	A	13.3	A	54.6	A	7.3	A	20.7	A	6.4	A	13.7	A	25.7	A	gb:NM_145651.1 /DB_XREF=gi:21717813 /GEN=RYD5 /TID=Hs2.127059.1 /CNT=6 /FEA=FLmRNA /TIER=FL /STK=4 /LL=147199 /UG=Hs.127059 /DEF=Homo sapiens putative ligand binding protein RYD5 (RYD5), mRNA. /PROD=putative ligand binding protein RYD5 /FL=gb:NM_145651.1 gb:AY026938.1
1552450_a_at	197.9	A	32.5	A	91.1	A	17.3	A	150.9	A	114.5	A	322.5	A	104.6	A	103.1	A	56	A	94.7	A	161.6	A	gb:NM_173650.1 /DB_XREF=gi:27735106 /TID=Hs2.116303.1 /CNT=8 /FEA=FLmRNA /TIER=FL /STK=4 /LL=285126 /UG_GENE=FLJ40417 /UG=Hs.116303 /UG_TITLE=hypothetical protein FLJ40417 /DEF=Homo sapiens hypothetical protein FLJ40417 (FLJ40417), mRNA. /FL=gb:NM_173650.1
1552452_at	10.9	A	32.7	A	7.7	A	7.6	A	2.9	A	16.4	A	32.4	A	9.2	A	13.5	A	27.8	A	18.7	A	11.5	A	gb:NM_173479.1 /DB_XREF=gi:27735054 /TID=Hs2.211046.1 /CNT=7 /FEA=FLmRNA /TIER=FL /STK=4 /LL=126248 /UG_GENE=LOC126248 /UG=Hs.211046 /UG_TITLE=hypothetical protein LOC126248 /DEF=Homo sapiens hypothetical protein LOC126248 (LOC126248), mRNA. /FL=gb:NM_173479.1 gb:BC031227.1
1552453_a_at	6.1	A	7.9	A	9.2	A	4.3	A	8	A	11.5	A	24.2	A	9	A	7.7	A	7.2	A	8	A	5.8	A	gb:NM_173479.1 /DB_XREF=gi:27735054 /TID=Hs2.211046.1 /CNT=7 /FEA=FLmRNA /TIER=FL /STK=4 /LL=126248 /UG_GENE=LOC126248 /UG=Hs.211046 /UG_TITLE=hypothetical protein LOC126248 /DEF=Homo sapiens hypothetical protein LOC126248 (LOC126248), mRNA. /FL=gb:NM_173479.1 gb:BC031227.1
1552455_at	117.5	A	98.8	A	63.3	A	62.3	A	45.5	A	22.6	A	161.4	A	278.5	P	62.4	A	6	A	120.4	A	83.8	A	gb:NM_138818.1 /DB_XREF=gi:20270384 /TID=Hs2.352153.1 /CNT=6 /FEA=FLmRNA /TIER=FL /STK=4 /LL=158471 /UG_GENE=LOC158471 /UG=Hs.352153 /UG_TITLE=hypothetical protein BC019095 /DEF=Homo sapiens hypothetical protein BC019095 (LOC158471), mRNA. /FL=gb:NM_138818.1 gb:BC019095.1
1552456_a_at	31.1	A	39.4	A	8.1	A	17.7	A	23.2	A	20.7	A	44.4	A	8.5	A	25.4	A	15.7	A	76	A	47.5	A	gb:NM_144614.2 /DB_XREF=gi:28144903 /GEN=MBD3L2 /TID=Hs2.197664.1 /CNT=5 /FEA=FLmRNA /TIER=FL /STK=4 /LL=125997 /UG=Hs.197664 /DEF=Homo sapiens methyl-CpG binding domain protein 3-like 2 (MBD3L2), mRNA. /PROD=methyl-CpG binding domain protein 3-like 2 /FL=gb:AF503919.2 gb:NM_144614.2
1552457_a_at	21.4	A	9.8	A	4.4	A	7.9	A	11	A	56.4	A	14.4	A	6	A	9.1	A	4	A	7.8	A	13.1	A	gb:NM_052866.2 /DB_XREF=gi:21327690 /GEN=ADAMTSL1 /TID=Hs2.275184.1 /CNT=4 /FEA=FLmRNA /TIER=FL /STK=4 /LL=92949 /UG=Hs.275184 /DEF=Homo sapiens ADAMTS-like 1 (ADAMTSL1), transcript variant 2, mRNA. /PROD=ADAM-TS related protein 1 isoform 2 /FL=gb:NM_052866.2 gb:AF176313.1
1552458_at	84.9	A	32.9	A	23.8	A	18.3	A	122	A	51.6	A	29.1	A	46.8	A	90.8	A	54.3	A	3.7	A	71.9	A	gb:NM_145208.1 /DB_XREF=gi:21624655 /GEN=MBD3L /TID=Hs2.133912.1 /CNT=4 /FEA=FLmRNA /TIER=FL /STK=4 /LL=85509 /UG=Hs.133912 /DEF=Homo sapiens methyl-CpG binding domain protein 3-like (MBD3L), mRNA. /PROD=methyl-CpG binding domain protein 3-like /FL=gb:AY038022.1 gb:NM_145208.1
1552459_a_at	15.3	A	13.7	A	18.9	A	16.9	A	19.3	A	84.1	A	82.2	A	11.2	A	43.4	A	20.1	A	140.7	A	55.1	A	gb:NM_145208.1 /DB_XREF=gi:21624655 /GEN=MBD3L /TID=Hs2.133912.1 /CNT=4 /FEA=FLmRNA /TIER=FL /STK=4 /LL=85509 /UG=Hs.133912 /DEF=Homo sapiens methyl-CpG binding domain protein 3-like (MBD3L), mRNA. /PROD=methyl-CpG binding domain protein 3-like /FL=gb:AY038022.1 gb:NM_145208.1
1552461_at	9.4	A	78.4	A	28.9	A	16.2	A	91.1	A	61.5	A	96	A	6.3	A	20.7	A	12	A	33.3	A	14	A	gb:NM_152630.1 /DB_XREF=gi:22749286 /TID=Hs2.367959.1 /CNT=6 /FEA=FLmRNA /TIER=FL /STK=4 /LL=169966 /UG_GENE=MGC26999 /UG=Hs.367959 /UG_TITLE=hypothetical protein MGC26999 /DEF=Homo sapiens hypothetical protein MGC26999 (MGC26999), mRNA. /FL=gb:BC030784.1 gb:NM_152630.1 gb:BC028710.1 gb:BC034979.1
1552463_at	82.4	A	64.8	P	59.4	A	71.6	A	79.3	A	93.9	A	369.9	A	65.4	A	85	P	69.4	P	105.5	P	69.6	P	gb:NM_080475.1 /DB_XREF=gi:17978302 /TID=Hs2.350958.1 /CNT=4 /FEA=FLmRNA /TIER=FL /STK=4 /LL=89778 /UG_GENE=SERPINB11 /UG=Hs.350958 /UG_TITLE=serine (or cysteine) proteinase inhibitor, clade B (ovalbumin), member 11 /DEF=Homo sapiens serine (or cysteine) proteinase inhibitor, clade B (ovalbumin), member 11 (SERPINB11), mRNA. /FL=gb:NM_080475.1 gb:AF419955.1 gb:AF419953.1 gb:AF419954.1
1552466_x_at	2.4	A	10.2	A	20.6	A	12.7	A	50.3	A	5.8	A	23.6	A	2.6	A	12.8	A	8.2	A	8	A	2.2	A	gb:NM_145033.1 /DB_XREF=gi:21450764 /TID=Hs2.208166.1 /CNT=4 /FEA=FLmRNA /TIER=FL /STK=4 /LL=118421 /UG_GENE=C21orf100 /UG=Hs.208166 /UG_TITLE=chromosome 21 open reading frame 100 /DEF=Homo sapiens chromosome 21 open reading frame 100 (C21orf100), mRNA. /FL=gb:NM_145033.1 gb:AY063458.1
1552467_at	103.4	A	38.7	A	51.3	A	30.3	A	32.4	A	34	A	101.9	A	20.2	A	110.8	A	33	A	43	A	69.7	A	gb:NM_148676.1 /DB_XREF=gi:22380642 /TID=Hs2.147695.1 /CNT=4 /FEA=FLmRNA /TIER=FL /STK=4 /LL=259234 /UG_GENE=DSCR10 /UG=Hs.147695 /UG_TITLE=Down syndrome critical region gene 10 /DEF=Homo sapiens Down syndrome critical region gene 10 (DSCR10), mRNA. /FL=gb:AB066291.1 gb:NM_148676.1
1552468_a_at	251.7	A	151.8	A	26.4	A	101.8	A	28	A	125.6	A	88.7	A	99.8	A	46.9	A	271	A	223.2	A	163	A	gb:NM_148676.1 /DB_XREF=gi:22380642 /TID=Hs2.147695.1 /CNT=4 /FEA=FLmRNA /TIER=FL /STK=4 /LL=259234 /UG_GENE=DSCR10 /UG=Hs.147695 /UG_TITLE=Down syndrome critical region gene 10 /DEF=Homo sapiens Down syndrome critical region gene 10 (DSCR10), mRNA. /FL=gb:AB066291.1 gb:NM_148676.1
1552470_a_at	202.5	A	74.1	A	7.7	A	152	A	135.5	A	134.2	A	21.7	A	120.7	A	232.1	P	133.5	A	122.7	A	204.4	M	gb:NM_148914.1 /DB_XREF=gi:23200013 /GEN=WBSCR21 /TID=Hs2.182476.1 /CNT=4 /FEA=FLmRNA /TIER=FL /STK=4 /LL=83451 /UG=Hs.182476 /DEF=Homo sapiens Williams Beuren syndrome chromosome region 21 (WBSCR21), transcript variant 3, mRNA. /PROD=Williams Beuren syndrome chromosome region 21isoform 3 /FL=gb:NM_148914.1 gb:AY053500.1
1552472_a_at	776.4	P	1111.5	P	1018.2	P	884.7	P	1064.2	P	1418.2	P	549.9	P	482.3	P	538.4	P	1050.2	P	837.7	P	517.3	P	gb:NM_012287.2 /DB_XREF=gi:24475610 /GEN=CENTB2 /TID=Hs2.24340.1 /CNT=31 /FEA=FLmRNA /TIER=FL /STK=3 /LL=23527 /UG=Hs.24340 /DEF=Homo sapiens centaurin, beta 2 (CENTB2), mRNA. /PROD=centaurin, beta 2 /FL=gb:NM_012287.2
1552473_at	108.7	A	130.7	A	364	A	387.4	A	253.6	A	89.7	A	106.9	A	1147.9	A	597.1	A	149.6	A	342.8	A	1045.5	A	gb:NM_138924.1 /DB_XREF=gi:20336211 /GEN=GAMT /TID=Hs2.81131.2 /CNT=34 /FEA=FLmRNA /TIER=FL /STK=3 /LL=2593 /UG=Hs.81131 /DEF=Homo sapiens guanidinoacetate N-methyltransferase (GAMT), transcript variant 2, mRNA. /PROD=guanidinoacetate N-methyltransferase, isoform b /FL=gb:NM_138924.1
1552474_a_at	1242.5	P	1243.5	P	1374.8	P	1895.9	P	1907.7	P	807.6	P	929.6	A	1841.6	P	1326.1	P	1631.3	P	1203.3	P	1752.2	P	gb:NM_138924.1 /DB_XREF=gi:20336211 /GEN=GAMT /TID=Hs2.81131.2 /CNT=34 /FEA=FLmRNA /TIER=FL /STK=3 /LL=2593 /UG=Hs.81131 /DEF=Homo sapiens guanidinoacetate N-methyltransferase (GAMT), transcript variant 2, mRNA. /PROD=guanidinoacetate N-methyltransferase, isoform b /FL=gb:NM_138924.1
1552476_s_at	314.9	A	355.5	A	148.2	A	420.7	M	452.2	A	87.4	A	549.6	A	243.4	A	377.4	A	779.8	A	367.5	A	424.6	A	gb:NM_133373.1 /DB_XREF=gi:19115963 /GEN=LOC113026 /TID=Hs2.380094.1 /CNT=59 /FEA=FLmRNA /TIER=FL /STK=3 /LL=113026 /UG=Hs.380094 /DEF=Homo sapiens similar to phospholipase C, delta (LOC113026), mRNA. /PROD=similar to phospholipase C, delta /FL=gb:NM_133373.1
1552477_a_at	147.9	M	643.8	P	30.5	A	57.9	A	61.4	A	91.3	A	230.9	A	45.7	A	52	A	22.9	A	55.4	A	51.6	A	gb:BC014852.1 /DB_XREF=gi:15928784 /TID=Hs2.11801.1 /CNT=59 /FEA=FLmRNA /TIER=FL /STK=3 /LL=3664 /UG_GENE=IRF6 /UG=Hs.11801 /DEF=Homo sapiens, interferon regulatory factor 6, clone MGC:5122 IMAGE:3449699, mRNA, complete cds. /PROD=interferon regulatory factor 6 /FL=gb:BC014852.1 gb:AF027292.1 gb:NM_006147.2
1552478_a_at	117.9	A	236.1	P	16.7	A	6.9	A	50.5	A	9.6	A	21.7	A	5.8	A	13.6	A	10.4	A	38.8	A	16.2	A	gb:NM_006147.2 /DB_XREF=gi:24497623 /GEN=IRF6 /TID=Hs2.11801.1 /CNT=59 /FEA=FLmRNA /TIER=ConsEnd /STK=0 /LL=3664 /UG=Hs.11801 /DEF=Homo sapiens interferon regulatory factor 6 (IRF6), mRNA. /PROD=interferon regulatory factor 6 /FL=gb:BC014852.1 gb:AF027292.1 gb:NM_006147.2
1552480_s_at	1.3	A	3.1	A	1.6	A	0.6	A	2.7	A	2.6	A	7.7	A	15.1	A	30.5	A	32.9	A	51.6	A	5.3	A	gb:NM_080923.1 /DB_XREF=gi:18641365 /GEN=PTPRC /TID=Hs2.170121.1 /CNT=22 /FEA=FLmRNA /TIER=FL /STK=3 /LL=5788 /UG=Hs.170121 /DEF=Homo sapiens protein tyrosine phosphatase, receptor type, C (PTPRC), transcript variant 4, mRNA. /PROD=protein tyrosine phosphatase, receptor type, C,isoform 4 /FL=gb:NM_080923.1
1552481_s_at	184	A	298.8	P	235	A	192.2	P	374	P	292.8	A	297.9	M	151.1	A	283.2	P	203.4	A	289.8	P	148.3	A	gb:NM_006699.1 /DB_XREF=gi:5729912 /GEN=MAN1A2 /TID=Hs2.367638.1 /CNT=37 /FEA=FLmRNA /TIER=FL /STK=3 /LL=10905 /UG=Hs.367638 /DEF=Homo sapiens mannosidase, alpha, class 1A, member 2 (MAN1A2), mRNA. /PROD=mannosidase, alpha, class 1A, member 2 /FL=gb:NM_006699.1 gb:AF027156.1
1552482_at	28.8	A	48.2	A	38	A	64.8	A	80	P	20.3	A	67.4	A	50.4	P	113.4	P	86.4	P	53.2	P	126.7	P	gb:NM_025252.1 /DB_XREF=gi:23943873 /GEN=ALS2CR9 /TID=Hs2.42656.1 /CNT=17 /FEA=FLmRNA /TIER=FL /STK=3 /LL=65059 /UG=Hs.42656 /DEF=Homo sapiens amyotrophic lateral sclerosis 2 (juvenile) chromosome region, candidate 9 (ALS2CR9), mRNA. /PROD=amyotrophic lateral sclerosis 2 chromosomeregion candidate 9 /FL=gb:AB053311.1 gb:NM_025252.1
1552484_at	81.3	A	89.6	A	51.5	A	183	A	88.1	A	84.9	A	170.6	A	45.6	A	45.8	A	56.3	A	27	A	65.5	A	gb:NM_144775.1 /DB_XREF=gi:21426844 /GEN=SMCR8 /TID=Hs2.334576.1 /CNT=23 /FEA=FLmRNA /TIER=FL /STK=3 /LL=140775 /UG=Hs.334576 /DEF=Homo sapiens Smith-Magenis syndrome chromosome region, candidate 8 (SMCR8), mRNA. /PROD=Smith-Magenis syndrome chromosome region,candidate 8 /FL=gb:NM_144775.1 gb:AF467440.1
1552485_at	713.6	P	877.5	P	346.4	P	241.6	P	445.4	P	344.8	P	310.1	P	362.2	P	282.9	P	359.9	P	633.9	P	388.2	P	gb:NM_171846.1 /DB_XREF=gi:26051232 /GEN=LACTB /TID=Hs2.374554.2 /CNT=14 /FEA=FLmRNA /TIER=FL /STK=3 /LL=114294 /UG=Hs.374554 /DEF=Homo sapiens lactamase, beta (LACTB), transcript variant 2, nuclear gene encoding mitochondrial protein, mRNA. /PROD=lactamase, beta isoform b /FL=gb:NM_171846.1
1552486_s_at	748.9	P	819.3	P	284	P	231.2	P	630.4	P	250.3	P	255.5	P	598.5	P	348.3	P	345.7	P	537.2	P	199.6	P	gb:NM_171846.1 /DB_XREF=gi:26051232 /GEN=LACTB /TID=Hs2.374554.2 /CNT=14 /FEA=FLmRNA /TIER=FL /STK=3 /LL=114294 /UG=Hs.374554 /DEF=Homo sapiens lactamase, beta (LACTB), transcript variant 2, nuclear gene encoding mitochondrial protein, mRNA. /PROD=lactamase, beta isoform b /FL=gb:NM_171846.1
1552487_a_at	5.5	A	53.4	A	24.3	A	455.4	P	5.9	A	3.5	A	8.4	A	4.4	A	4.2	A	5.6	A	3	A	4.5	A	gb:NM_001717.2 /DB_XREF=gi:19743791 /GEN=BNC /TID=Hs2.64025.1 /CNT=22 /FEA=FLmRNA /TIER=FL /STK=3 /LL=646 /UG=Hs.64025 /DEF=Homo sapiens basonuclin (BNC), mRNA. /PROD=basonuclin /FL=gb:NM_001717.2
1552489_s_at	24.3	A	8.2	A	19.3	A	115.9	P	10.5	A	2.3	A	12.9	A	13.3	A	132.9	M	72.1	A	7.1	A	69.5	A	gb:NM_033066.1 /DB_XREF=gi:14780901 /GEN=MPP4 /TID=Hs2.63085.1 /CNT=16 /FEA=FLmRNA /TIER=FL /STK=3 /LL=58538 /UG=Hs.63085 /DEF=Homo sapiens membrane protein, palmitoylated 4 (MAGUK p55 subfamily member 4) (MPP4), mRNA. /PROD=membrane protein, palmitoylated 4 (MAGUK p55subfamily member 4) /FL=gb:AF316032.1 gb:NM_033066.1
1552490_at	61.4	A	152.9	P	21.4	A	60.7	P	86.8	P	73.9	P	141.5	A	56.4	P	92	P	59.1	A	118.1	A	119.5	P	gb:NM_145315.2 /DB_XREF=gi:21918871 /GEN=LACE1 /TID=Hs2.164285.1 /CNT=16 /FEA=FLmRNA /TIER=FL /STK=3 /LL=246269 /UG=Hs.164285 /DEF=Homo sapiens lactation elevated 1 (LACE1), mRNA. /PROD=lactation elevated 1 /FL=gb:AF520418.1 gb:NM_145315.2 gb:BC018445.1
1552491_at	125.3	A	74.5	A	20.7	A	125.8	A	34.7	A	86.6	A	59.2	A	80.9	A	27.4	A	174	A	127.1	A	118.7	A	gb:NM_033261.2 /DB_XREF=gi:21361855 /GEN=IDI2 /TID=Hs2.9270.1 /CNT=11 /FEA=FLmRNA /TIER=FL /STK=3 /LL=91734 /UG=Hs.9270 /DEF=Homo sapiens diphosphate dimethylallyl diphosphate isomerase 2 (IDI2), mRNA. /PROD=diphosphate dimethylallyl diphosphate isomerase2 /FL=gb:NM_033261.2 gb:BC017778.1 gb:AF271725.1
1552493_s_at	12	A	14.7	A	6.3	A	8.8	A	31.8	A	7.9	A	46.9	A	6.6	A	41.4	A	8	A	13.4	A	12.7	A	gb:NM_000497.2 /DB_XREF=gi:13904852 /GEN=CYP11B1 /TID=Hs2.377912.1 /CNT=15 /FEA=FLmRNA /TIER=FL /STK=3 /LL=1584 /UG=Hs.377912 /DEF=Homo sapiens cytochrome P450, family 11, subfamily B, polypeptide 1 (CYP11B1), nuclear gene encoding mitochondrial protein, mRNA. /PROD=cytochrome P450, subfamily XIB (steroid11-beta-hydroxylase), polypeptide 1 precursor /FL=gb:AF478474.1 gb:NM_000497.2
1552494_at	14.9	A	34.5	A	39.4	A	25.3	A	123.2	A	26.2	A	86.1	A	11.8	A	16.3	A	82.4	A	12.8	A	5.4	A	gb:NM_138572.1 /DB_XREF=gi:20070377 /GEN=LOC135763 /TID=Hs2.254211.1 /CNT=12 /FEA=FLmRNA /TIER=FL /STK=3 /LL=135763 /UG=Hs.254211 /DEF=Homo sapiens taube nuss (LOC135763), mRNA. /PROD=taube nuss /FL=gb:NM_138572.1
1552496_a_at	10.8	A	8.3	A	54.1	A	2.7	A	12	A	7.5	A	33.7	A	30.3	A	11.1	A	4.6	A	428.3	P	11	A	gb:NM_015198.1 /DB_XREF=gi:24308020 /GEN=COBL /TID=Hs2.33010.1 /CNT=21 /FEA=FLmRNA /TIER=FL /STK=3 /LL=23242 /UG=Hs.33010 /DEF=Homo sapiens KIAA0633 protein (COBL), mRNA. /PROD=KIAA0633 protein /FL=gb:NM_015198.1
1552497_a_at	356.1	P	227.3	A	119.2	A	205.9	P	261.4	P	152.7	A	209.8	A	133.4	P	306.3	M	279.1	P	211.9	P	386	P	gb:NM_052931.2 /DB_XREF=gi:19924170 /GEN=KALI /TID=Hs2.293286.1 /CNT=13 /FEA=FLmRNA /TIER=FL /STK=3 /LL=114836 /UG=Hs.293286 /DEF=Homo sapiens activating NK receptor (KALI), mRNA. /PROD=activating NK receptor precursor /FL=gb:NM_052931.2
1552498_at	171	A	115.6	A	27.7	A	75.9	A	172	A	216	P	67.7	A	6.8	A	126.1	A	135.1	A	176.2	A	121.4	A	gb:NM_145238.1 /DB_XREF=gi:21955123 /GEN=ZNF31 /TID=Hs2.195041.1 /CNT=12 /FEA=FLmRNA /TIER=FL /STK=3 /LL=7579 /UG=Hs.195041 /DEF=Homo sapiens zinc finger protein 31 (KOX 29) (ZNF31), mRNA. /PROD=zinc finger protein 31 /FL=gb:BC008827.1 gb:NM_145238.1
1552499_a_at	96.4	A	102.7	A	58.6	A	75.5	P	143.2	M	86.4	A	197.6	A	64.6	A	89.8	A	65.5	A	105.8	A	64.4	A	gb:NM_145238.1 /DB_XREF=gi:21955123 /GEN=ZNF31 /TID=Hs2.195041.1 /CNT=12 /FEA=FLmRNA /TIER=FL /STK=3 /LL=7579 /UG=Hs.195041 /DEF=Homo sapiens zinc finger protein 31 (KOX 29) (ZNF31), mRNA. /PROD=zinc finger protein 31 /FL=gb:BC008827.1 gb:NM_145238.1
1552501_a_at	49.1	A	65.5	A	86.4	A	109.6	A	137.5	A	86.8	A	78.5	A	69.4	A	78.7	A	44.1	A	10.9	A	57.2	A	gb:NM_170699.1 /DB_XREF=gi:24850108 /GEN=GPBAR1 /TID=Hs2.160954.1 /CNT=12 /FEA=FLmRNA /TIER=FL /STK=3 /LL=151306 /UG=Hs.160954 /DEF=Homo sapiens G protein-coupled bile acid receptor 1 (GPBAR1), mRNA. /PROD=G-protein coupled bile acid receptor BG37 /FL=gb:NM_170699.1 gb:AB089307.1 gb:BC033625.1
1552502_s_at	73	A	143.1	A	8.2	A	30.1	A	98.4	A	31.2	A	138.8	A	44.1	A	53.4	A	25	A	8.1	A	155.3	P	gb:NM_017821.2 /DB_XREF=gi:24497630 /GEN=RHBDL2 /TID=Hs2.433304.1 /CNT=11 /FEA=FLmRNA /TIER=FL /STK=3 /LL=54933 /UG=Hs.433304 /DEF=Homo sapiens rhomboid, veinlet-like 2 (Drosophila) (RHBDL2), mRNA. /PROD=rhomboid-related protein 2 /FL=gb:NM_017821.2 gb:AY126343.1
1552503_at	70.7	A	130.4	A	131.3	A	84	A	48.8	A	185.4	A	159	A	84.7	A	270.7	A	48.6	A	193.6	A	194	A	gb:NM_032863.1 /DB_XREF=gi:14249599 /TID=Hs2.334634.1 /CNT=9 /FEA=FLmRNA /TIER=FL /STK=3 /LL=84949 /UG_GENE=FLJ14927 /UG=Hs.334634 /UG_TITLE=hypothetical protein FLJ14927 /DEF=Homo sapiens hypothetical protein FLJ14927 (FLJ14927), mRNA. /FL=gb:NM_032863.1
1552504_a_at	190	A	47.3	A	204.4	A	234.7	A	269.5	A	530.6	P	238.6	A	126.5	A	147.4	A	402.7	A	112.8	A	279.7	A	gb:NM_032430.1 /DB_XREF=gi:24308325 /GEN=KIAA1811 /TID=Hs2.182081.1 /CNT=8 /FEA=FLmRNA /TIER=FL /STK=3 /LL=84446 /UG=Hs.182081 /DEF=Homo sapiens KIAA1811 protein (KIAA1811), mRNA. /PROD=KIAA1811 protein /FL=gb:AF479827.1 gb:NM_032430.1
1552506_at	37.8	A	79.2	A	50.7	A	85.6	A	102.6	A	100.8	A	87.5	A	72.6	A	32.2	A	65.1	A	16.6	A	66.9	A	gb:NM_173689.1 /DB_XREF=gi:27735144 /TID=Hs2.373527.1 /CNT=8 /FEA=FLmRNA /TIER=FL /STK=3 /LL=286204 /UG_GENE=FLJ38464 /UG=Hs.373527 /UG_TITLE=hypothetical protein FLJ38464 /DEF=Homo sapiens hypothetical protein FLJ38464 (FLJ38464), mRNA. /FL=gb:NM_173689.1
1552507_at	1046.4	P	898.8	P	162.3	A	76.7	A	122.4	A	176.7	A	374.3	A	40.2	A	569.5	P	375.6	A	142.8	A	173.4	A	gb:NM_080671.1 /DB_XREF=gi:18087850 /GEN=KCNE4 /TID=Hs2.348522.1 /CNT=13 /FEA=FLmRNA /TIER=FL /STK=3 /LL=23704 /UG=Hs.348522 /DEF=Homo sapiens potassium voltage-gated channel, Isk-related family, member 4 (KCNE4), mRNA. /PROD=potassium voltage-gated channel, Isk-relatedfamily, member 4 /FL=gb:BC014429.1 gb:AY065987.1 gb:NM_080671.1
1552508_at	793.4	P	693.2	P	80.3	A	13	A	9.6	A	128.6	A	326.1	A	44.2	A	440.1	P	404.3	P	113.4	A	40.5	A	gb:NM_080671.1 /DB_XREF=gi:18087850 /GEN=KCNE4 /TID=Hs2.348522.1 /CNT=13 /FEA=FLmRNA /TIER=ConsEnd /STK=0 /LL=23704 /UG=Hs.348522 /DEF=Homo sapiens potassium voltage-gated channel, Isk-related family, member 4 (KCNE4), mRNA. /PROD=potassium voltage-gated channel, Isk-relatedfamily, member 4 /FL=gb:BC014429.1 gb:AY065987.1 gb:NM_080671.1
1552509_a_at	173.4	A	93.9	A	37	A	72.2	A	19.4	A	86.3	A	127.9	A	17.8	A	79.1	A	55.2	A	141.7	P	70.8	A	gb:NM_145273.1 /DB_XREF=gi:21687217 /TID=Hs2.147313.1 /CNT=12 /FEA=FLmRNA /TIER=FL /STK=3 /LL=146894 /UG_GENE=LOC146894 /UG=Hs.147313 /UG_TITLE=similar to CMRF35 antigen precursor (CMRF-35) /DEF=Homo sapiens similar to CMRF35 antigen precursor (CMRF-35) (LOC146894), mRNA. /FL=gb:BC025395.1 gb:NM_145273.1
1552510_at	739	A	861.7	A	644	A	568.9	A	833.8	A	819.7	A	1671.2	A	421.3	A	655	A	1428.7	A	747.5	A	1113.8	A	gb:NM_080877.1 /DB_XREF=gi:25014087 /GEN=NPTIIc /TID=Hs2.189144.1 /CNT=10 /FEA=FLmRNA /TIER=FL /STK=3 /LL=142680 /UG=Hs.189144 /DEF=Homo sapiens type IIc Na+Pi cotransporter (NPTIIc), mRNA. /PROD=type IIc Na+Pi cotransporter /FL=gb:NM_080877.1 gb:AB055000.1
1552511_a_at	6.1	A	4.2	A	5.2	A	2.1	A	6.5	A	18.4	A	16.3	A	5.8	A	6.9	A	3.2	A	22.3	A	28.2	A	gb:NM_020361.2 /DB_XREF=gi:24111254 /GEN=CPA6 /TID=Hs2.283310.1 /CNT=10 /FEA=FLmRNA /TIER=FL /STK=3 /LL=57094 /UG=Hs.283310 /DEF=Homo sapiens carboxypeptidase A6 (CPA6), mRNA. /PROD=carboxypeptidase B precursor /FL=gb:NM_020361.2 gb:BC033684.1
1552514_at	11	A	13.5	A	30.4	A	23	A	25.8	A	57.2	A	64.2	A	9	A	7.3	A	28.4	A	52.3	A	32	A	gb:NM_152613.1 /DB_XREF=gi:22749254 /TID=Hs2.352159.1 /CNT=7 /FEA=FLmRNA /TIER=FL /STK=3 /LL=164684 /UG_GENE=MGC26816 /UG=Hs.352159 /UG_TITLE=hypothetical protein MGC26816 /DEF=Homo sapiens hypothetical protein MGC26816 (MGC26816), mRNA. /FL=gb:NM_152613.1 gb:BC022549.1 gb:BC022546.1
1552515_at	123.8	A	66.2	A	59.9	A	21.8	A	70.3	A	7.3	A	152.5	A	43.4	A	47.8	A	66.6	A	14.9	A	96	A	gb:NM_152696.1 /DB_XREF=gi:23397583 /TID=Hs2.12259.1 /CNT=13 /FEA=FLmRNA /TIER=FL /STK=3 /LL=204851 /UG_GENE=Nbak2 /UG=Hs.12259 /UG_TITLE=homeodomain interacting protein kinase 1-like protein /DEF=Homo sapiens homeodomain interacting protein kinase 1-like protein (Nbak2), mRNA. /FL=gb:BC033012.1 gb:NM_152696.1
1552516_a_at	199.5	A	265.8	A	153.3	A	165.2	A	373.5	A	150.4	A	147	A	178.4	A	202.2	A	304.9	A	254.7	A	89.9	A	gb:NM_152696.1 /DB_XREF=gi:23397583 /TID=Hs2.12259.1 /CNT=13 /FEA=FLmRNA /TIER=FL /STK=3 /LL=204851 /UG_GENE=Nbak2 /UG=Hs.12259 /UG_TITLE=homeodomain interacting protein kinase 1-like protein /DEF=Homo sapiens homeodomain interacting protein kinase 1-like protein (Nbak2), mRNA. /FL=gb:BC033012.1 gb:NM_152696.1
1552518_s_at	61.3	A	10.7	A	5.2	A	5.4	A	60.3	A	9.9	A	6.6	A	119.3	A	138.6	A	63.4	A	98.9	A	145.7	A	gb:NM_022045.2 /DB_XREF=gi:21630256 /GEN=MTBP /TID=Hs2.348378.1 /CNT=12 /FEA=FLmRNA /TIER=FL /STK=3 /LL=27085 /UG=Hs.348378 /DEF=Homo sapiens Mdm2, transformed 3T3 cell double minute 2, p53 binding protein (mouse) binding protein, 104kDa (MTBP), mRNA. /PROD=Mdm2, transformed 3T3 cell double minute 2, p53binding protein binding protein /FL=gb:BC013136.1 gb:NM_022045.2
1552519_at	259.7	P	396.4	P	321.4	P	71	A	163.9	A	88.7	A	99.4	A	232.3	P	90.3	P	20	A	302.1	P	107.9	A	gb:NM_145259.1 /DB_XREF=gi:21687097 /GEN=ALK7 /TID=Hs2.352338.1 /CNT=10 /FEA=FLmRNA /TIER=FL /STK=3 /LL=130399 /UG=Hs.352338 /DEF=Homo sapiens activin receptor-like kinase 7 (ALK7), mRNA. /PROD=activin receptor-like kinase 7 /FL=gb:AY127050.1 gb:NM_145259.1 gb:BC022530.1
1552520_at	198.2	A	157.8	P	105.8	P	44.5	A	80.3	P	83.4	A	73.9	A	90.3	P	154.3	P	99.9	P	153.4	P	269.4	P	gb:BC030710.1 /DB_XREF=gi:21265147 /TID=Hs2.99439.1 /CNT=10 /FEA=FLmRNA /TIER=FL /STK=3 /LL=157753 /UG_GENE=FLJ30668 /UG=Hs.99439 /DEF=Homo sapiens, similar to hypothetical protein FLJ11190, clone MGC:33522 IMAGE:4819093, mRNA, complete cds. /PROD=similar to hypothetical protein FLJ11190 /FL=gb:NM_153015.1 gb:BC030710.1
1552521_a_at	81.4	A	25.3	A	19.4	A	41.2	A	37	M	36.2	A	5.5	A	44.4	A	75.2	P	1.9	A	5	A	122.9	P	gb:BC030710.1 /DB_XREF=gi:21265147 /TID=Hs2.99439.1 /CNT=10 /FEA=FLmRNA /TIER=FL /STK=3 /LL=157753 /UG_GENE=FLJ30668 /UG=Hs.99439 /DEF=Homo sapiens, similar to hypothetical protein FLJ11190, clone MGC:33522 IMAGE:4819093, mRNA, complete cds. /PROD=similar to hypothetical protein FLJ11190 /FL=gb:NM_153015.1 gb:BC030710.1
1552522_at	81.6	A	70.5	A	45	A	52.3	P	48.6	A	54.8	A	89.2	A	39.2	A	71.9	A	84	A	75.4	P	41.9	A	gb:NM_145720.2 /DB_XREF=gi:28416947 /GEN=TIGD4 /TID=Hs2.188296.1 /CNT=9 /FEA=FLmRNA /TIER=FL /STK=3 /LL=201798 /UG=Hs.188296 /DEF=Homo sapiens tigger transposable element derived 4 (TIGD4), mRNA. /PROD=tigger transposable element derived 4 /FL=gb:NM_145720.2 gb:BC037869.1
1552523_a_at	57.7	A	117.5	A	130.9	P	19.4	A	52.7	A	170.8	P	68.2	A	42.6	M	175.2	A	167.4	A	85.8	A	92.5	A	gb:NM_145720.2 /DB_XREF=gi:28416947 /GEN=TIGD4 /TID=Hs2.188296.1 /CNT=9 /FEA=FLmRNA /TIER=FL /STK=3 /LL=201798 /UG=Hs.188296 /DEF=Homo sapiens tigger transposable element derived 4 (TIGD4), mRNA. /PROD=tigger transposable element derived 4 /FL=gb:NM_145720.2 gb:BC037869.1
1552524_at	64.3	A	25.7	A	21.4	A	30.3	A	17.1	A	38.7	A	86.7	A	28	A	38.9	A	51.7	A	129.1	A	33.8	A	gb:NM_053017.1 /DB_XREF=gi:16519542 /GEN=ART5 /TID=Hs2.125680.1 /CNT=9 /FEA=FLmRNA /TIER=FL /STK=3 /LL=116969 /UG=Hs.125680 /DEF=Homo sapiens ADP-ribosyltransferase 5 (ART5), mRNA. /PROD=ADP-ribosyltransferase 5 /FL=gb:NM_053017.1 gb:BC014577.1
1552526_at	43.6	A	28.5	A	7.5	A	17.2	A	17.6	A	14.8	A	20	A	8.4	A	23.5	A	10.8	A	23.2	A	15.3	A	gb:NM_153364.1 /DB_XREF=gi:23503300 /TID=Hs2.97339.1 /CNT=8 /FEA=FLmRNA /TIER=FL /STK=3 /LL=196472 /UG_GENE=MGC39520 /UG=Hs.97339 /UG_TITLE=hypothetical protein MGC39520 /DEF=Homo sapiens hypothetical protein MGC39520 (MGC39520), mRNA. /FL=gb:BC031221.1 gb:NM_153364.1
1552528_at	96.4	A	123.8	A	89	A	119.3	A	164.6	A	133.5	A	47.5	A	75.5	A	26.6	A	16.1	A	76.1	A	74.6	A	gb:NM_058189.1 /DB_XREF=gi:17158020 /GEN=C21orf69 /TID=Hs2.351814.1 /CNT=8 /FEA=FLmRNA /TIER=FL /STK=3 /LL=84537 /UG=Hs.351814 /DEF=Homo sapiens chromosome 21 open reading frame 69 (C21orf69), mRNA. /PROD=chromosome 21 open reading frame 69 /FL=gb:NM_058189.1 gb:AY035381.1
1552531_a_at	143	A	137.9	A	7	A	67.9	A	112.6	A	7.6	A	24.8	A	40.5	A	13.4	A	12.7	A	106	A	70.1	A	gb:NM_145007.1 /DB_XREF=gi:21450724 /GEN=PYPAF6 /TID=Hs2.375039.1 /CNT=7 /FEA=FLmRNA /TIER=FL /STK=3 /LL=204801 /UG=Hs.375039 /DEF=Homo sapiens PYRIN-containing APAF1-like protein 6 (PYPAF6), mRNA. /PROD=PYRIN-containing APAF1-like protein 6 /FL=gb:NM_145007.1 gb:BC034730.1 gb:AY095145.1
1552532_a_at	7.6	A	4.6	A	80.1	A	7.4	A	1.9	A	11.3	A	37.7	A	1.4	A	4.6	A	4.8	A	10.9	A	28.3	A	gb:NM_144583.1 /DB_XREF=gi:21389364 /GEN=ATP6V1C2 /TID=Hs2.372429.1 /CNT=7 /FEA=FLmRNA /TIER=FL /STK=3 /LL=245973 /UG=Hs.372429 /DEF=Homo sapiens ATPase, H+ transporting, lysosomal 42kDa, V1 subunit C isoform 2 (ATP6V1C2), mRNA. /PROD=ATPase, H+ transporting, lysosomal 42kDa, V1subunit C isoform 2 /FL=gb:NM_144583.1 gb:BC012142.1
1552535_at	225.2	A	141.9	A	183.3	P	155.5	M	135.5	A	169.6	A	251.6	A	115.1	A	207.8	P	137	A	123.7	A	121.3	A	gb:NM_148960.1 /DB_XREF=gi:22507371 /GEN=CLDN19 /TID=Hs2.298539.1 /CNT=7 /FEA=FLmRNA /TIER=FL /STK=3 /LL=149461 /UG=Hs.298539 /DEF=Homo sapiens claudin 19 (CLDN19), mRNA. /PROD=claudin 19 /FL=gb:NM_148960.1
1552536_at	84.4	A	117.8	A	125.2	P	67.4	A	50.8	A	30.8	A	202.8	A	97.3	A	81.4	P	13.2	A	67.3	A	107.8	A	gb:NM_145206.1 /DB_XREF=gi:21624647 /GEN=VTI1A /TID=Hs2.189575.1 /CNT=7 /FEA=FLmRNA /TIER=FL /STK=3 /LL=143187 /UG=Hs.189575 /DEF=Homo sapiens vesicle transport through interaction with t-SNAREs homolog 1A (yeast) (VTI1A), mRNA. /PROD=SNARE Vti1a-beta protein /FL=gb:BC017052.1 gb:NM_145206.1
1552538_a_at	19.3	A	10.9	A	23.2	A	55.1	A	74.3	P	189.5	P	576.1	P	42.7	A	9.9	A	6.2	A	12.4	A	4.6	A	gb:NM_145027.1 /DB_XREF=gi:21450762 /TID=Hs2.289252.1 /CNT=7 /FEA=FLmRNA /TIER=FL /STK=3 /LL=221458 /UG_GENE=MGC33317 /UG=Hs.289252 /UG_TITLE=hypothetical protein MGC33317 /DEF=Homo sapiens hypothetical protein MGC33317 (MGC33317), mRNA. /FL=gb:BC022074.1 gb:NM_145027.1
1552540_s_at	156.2	A	195.1	A	67.5	A	154.9	A	136.5	A	89.9	A	286.2	A	107.5	A	243.3	A	251	A	104.6	A	22.7	A	gb:NM_138451.1 /DB_XREF=gi:19923980 /TID=Hs2.254936.1 /CNT=7 /FEA=FLmRNA /TIER=FL /STK=3 /LL=115811 /UG_GENE=LOC115811 /UG=Hs.254936 /UG_TITLE=hypothetical protein BC013151 /DEF=Homo sapiens hypothetical protein BC013151 (LOC115811), mRNA. /FL=gb:BC013151.1 gb:NM_138451.1
1552541_at	170.1	A	195.8	P	209.9	A	158.3	A	231.8	A	176	A	497.8	A	257.3	A	307.7	A	263.5	A	189.7	A	187.1	A	gb:NM_138810.2 /DB_XREF=gi:23199968 /GEN=TAGAP /TID=Hs2.146065.2 /CNT=7 /FEA=FLmRNA /TIER=FL /STK=3 /LL=117289 /UG=Hs.146065 /DEF=Homo sapiens T-cell activation GTPase activating protein (TAGAP), transcript variant 3, mRNA. /PROD=T-cell activation Rho GTPase-activating proteinisoform c /FL=gb:NM_138810.2 gb:BC015859.1
1552542_s_at	19.6	A	48.4	A	60.9	A	41.5	A	34.1	A	31.5	A	35.4	A	33.1	A	59.6	A	18.6	A	61.9	A	65.1	A	gb:NM_138810.2 /DB_XREF=gi:23199968 /GEN=TAGAP /TID=Hs2.146065.2 /CNT=7 /FEA=FLmRNA /TIER=FL /STK=3 /LL=117289 /UG=Hs.146065 /DEF=Homo sapiens T-cell activation GTPase activating protein (TAGAP), transcript variant 3, mRNA. /PROD=T-cell activation Rho GTPase-activating proteinisoform c /FL=gb:NM_138810.2 gb:BC015859.1
1552543_a_at	132.2	A	164.5	A	47.4	A	125.7	A	50.4	A	100.7	A	227.3	A	113	A	55.9	A	148.9	A	144.5	A	115.2	A	gb:NM_033104.2 /DB_XREF=gi:21361862 /GEN=STN2 /TID=Hs2.336428.1 /CNT=6 /FEA=FLmRNA /TIER=FL /STK=3 /LL=85439 /UG=Hs.336428 /DEF=Homo sapiens stonin 2 (STN2), mRNA. /PROD=stonin 2 /FL=gb:AF380833.1 gb:AF449430.1 gb:NM_033104.2
1552544_at	147.4	A	161.6	A	137.6	A	161.7	A	164.4	A	66.4	A	100.6	A	54.9	A	130.1	A	272.5	P	278.1	A	118.4	A	gb:BC040857.1 /DB_XREF=gi:27155066 /TID=Hs2.99476.1 /CNT=6 /FEA=FLmRNA /TIER=FL /STK=3 /LL=145264 /UG_GENE=OL-64 /UG=Hs.99476 /DEF=Homo sapiens, Similar to OL-64 protein, clone MGC:50359 IMAGE:5527002, mRNA, complete cds. /PROD=Similar to OL-64 protein /FL=gb:AY177692.1 gb:NM_173850.1 gb:BC040857.1
1552546_a_at	163.6	A	129.6	A	93.4	A	929.8	P	132.4	P	32	A	24.4	A	81.9	P	127.2	P	105.6	A	144.5	P	273.5	P	gb:NM_144652.1 /DB_XREF=gi:21389522 /TID=Hs2.125266.1 /CNT=6 /FEA=FLmRNA /TIER=FL /STK=3 /LL=137994 /UG_GENE=FLJ25409 /UG=Hs.125266 /UG_TITLE=hypothetical protein FLJ25409 /DEF=Homo sapiens hypothetical protein FLJ25409 (FLJ25409), mRNA. /FL=gb:NM_144652.1
1552548_at	102	A	133.2	A	87	A	114.3	A	86.8	A	161.1	A	45	A	105.1	A	23.8	A	115.4	A	80.2	A	119.4	A	gb:NM_057176.2 /DB_XREF=gi:20357592 /GEN=BSND /TID=Hs2.151291.1 /CNT=6 /FEA=FLmRNA /TIER=FL /STK=3 /LL=7809 /UG=Hs.151291 /DEF=Homo sapiens barttin (BSND), mRNA. /PROD=barttin /FL=gb:NM_057176.2 gb:AY034632.1
1552549_a_at	254.1	A	60.6	A	145.9	A	122.2	A	238	A	51.9	A	311.2	A	179.9	A	64.2	A	133.8	A	54.2	A	143.9	A	gb:NM_057176.2 /DB_XREF=gi:20357592 /GEN=BSND /TID=Hs2.151291.1 /CNT=6 /FEA=FLmRNA /TIER=FL /STK=3 /LL=7809 /UG=Hs.151291 /DEF=Homo sapiens barttin (BSND), mRNA. /PROD=barttin /FL=gb:NM_057176.2 gb:AY034632.1
1552552_s_at	67.6	A	7.6	A	76.9	A	51.3	A	56.4	A	15.4	A	105.5	A	17.2	A	73.8	A	80.2	A	74	A	62.8	A	gb:NM_130441.1 /DB_XREF=gi:18466805 /GEN=CLECSF11 /TID=Hs2.351812.1 /CNT=6 /FEA=FLmRNA /TIER=FL /STK=3 /LL=170482 /UG=Hs.351812 /DEF=Homo sapiens C-type (calcium dependent, carbohydrate-recognition domain) lectin, superfamily member 11 (CLECSF11), mRNA. /PROD=dendritic cell lectin b /FL=gb:NM_130441.1 gb:AF325459.1 gb:AF293615.1
1552553_a_at	12	A	78.9	A	11.6	A	10	A	8.1	A	4.5	A	35.6	A	9.7	A	37.5	A	24.1	A	17.2	A	34.1	A	gb:NM_021209.2 /DB_XREF=gi:20127597 /GEN=CARD12 /TID=Hs2.23248.1 /CNT=8 /FEA=FLmRNA /TIER=FL /STK=3 /LL=58484 /UG=Hs.23248 /DEF=Homo sapiens caspase recruitment domain family, member 12 (CARD12), mRNA. /PROD=caspase recruitment domain protein 12 /FL=gb:AY027790.1 gb:NM_021209.2 gb:AY027789.1 gb:AY035391.1 gb:AY027787.1
1552554_a_at	20	A	141.3	A	52.5	A	54.1	A	7.1	A	46.1	A	143.1	A	8.7	A	89.5	A	96.9	M	56	A	71.1	A	gb:AY027790.1 /DB_XREF=gi:14324118 /GEN=CLAN1 /TID=Hs2.23248.1 /CNT=8 /FEA=FLmRNA /TIER=FL /STK=1 /LL=58484 /UG=Hs.23248 /DEF=Homo sapiens CLAND (CLAN1) mRNA, complete cds. /PROD=CLAND /FL=gb:AY027790.1 gb:NM_021209.2 gb:AY027789.1 gb:AY035391.1 gb:AY027787.1
1552555_at	61.4	A	232.8	A	114.1	A	74.6	A	114.5	A	203.2	A	123.4	A	51.4	A	57.9	A	30.1	A	46.3	A	45.6	A	gb:NM_173502.1 /DB_XREF=gi:27735116 /TID=Hs2.256632.1 /CNT=8 /FEA=FLmRNA /TIER=FL /STK=3 /LL=146547 /UG_GENE=FLJ90661 /UG=Hs.256632 /UG_TITLE=hypothetical protein FLJ90661 /DEF=Homo sapiens hypothetical protein FLJ90661 (FLJ90661), mRNA. /FL=gb:NM_173502.1
1552557_a_at	67	A	78.7	A	9.3	A	2.6	A	70.2	A	71	A	117.7	A	55.5	A	66.6	A	74.5	A	42.7	A	9.6	A	gb:NM_144969.1 /DB_XREF=gi:21450652 /TID=Hs2.157825.1 /CNT=8 /FEA=FLmRNA /TIER=FL /STK=3 /LL=158866 /UG_GENE=ZDHHC15 /UG=Hs.157825 /UG_TITLE=zinc finger, DHHC domain containing 15 /DEF=Homo sapiens hypothetical protein FLJ31812 (ZDHHC15), mRNA. /FL=gb:NM_144969.1
1552558_a_at	270.6	A	389	P	331.3	A	151	A	290.2	A	53.6	A	472.3	A	227	P	307.9	A	328.9	A	333.1	M	354.1	P	gb:NM_152256.1 /DB_XREF=gi:23111012 /GEN=RAI1 /TID=Hs2.110953.2 /CNT=7 /FEA=FLmRNA /TIER=FL /STK=3 /LL=10743 /UG=Hs.110953 /DEF=Homo sapiens retinoic acid induced 1 (RAI1), transcript variant 2, mRNA. /PROD=retinoic acid induced 1 isoform 2 /FL=gb:BC021209.1 gb:NM_152256.1
1552559_a_at	23.1	A	50.9	A	13.9	A	61.3	A	1744.9	A	18.2	A	54.2	A	13.6	A	39.3	A	20.8	A	31.6	A	40.3	A	gb:NM_139158.1 /DB_XREF=gi:21040234 /GEN=ALS2CR7 /TID=Hs2.348711.1 /CNT=7 /FEA=FLmRNA /TIER=FL /STK=3 /LL=65061 /UG=Hs.348711 /DEF=Homo sapiens amyotrophic lateral sclerosis 2 (juvenile) chromosome region, candidate 7 (ALS2CR7), mRNA. /PROD=amyotrophic lateral sclerosis 2 (juvenile)chromosome region, candidate 7 /FL=gb:AB053308.1 gb:NM_139158.1
1552562_at	126.2	A	145.7	P	150.6	M	79.3	A	216.7	A	256.6	P	277.6	A	98.6	M	88.8	A	104.2	A	164.1	A	50.9	A	gb:NM_144694.1 /DB_XREF=gi:21389598 /TID=Hs2.350875.1 /CNT=6 /FEA=FLmRNA /TIER=FL /STK=3 /LL=148268 /UG_GENE=FLJ30791 /UG=Hs.350875 /UG_TITLE=hypothetical protein FLJ30791 /DEF=Homo sapiens hypothetical protein FLJ30791 (FLJ30791), mRNA. /FL=gb:NM_144694.1
1552563_a_at	12.9	A	8.7	A	8	A	9.5	A	2.5	A	4.5	A	45.5	A	1.9	A	2.3	A	6.4	A	29	A	1.9	A	gb:NM_145656.1 /DB_XREF=gi:21717829 /TID=Hs2.291342.1 /CNT=6 /FEA=FLmRNA /TIER=FL /STK=3 /LL=203081 /UG_GENE=C8orf6 /UG=Hs.291342 /UG_TITLE=chromosome 8 open reading frame 6 /DEF=Homo sapiens chromosome 8 open reading frame 6 (C8orf6), mRNA. /FL=gb:NM_145656.1
1552564_at	5.7	A	21.2	A	7.6	A	31.9	A	9.9	A	9.2	A	26	A	26.2	A	11.7	A	8.9	A	6.1	A	40.5	A	gb:NM_153205.1 /DB_XREF=gi:24119284 /TID=Hs2.292857.1 /CNT=6 /FEA=FLmRNA /TIER=FL /STK=3 /LL=119369 /UG_GENE=MGC34007 /UG=Hs.292857 /UG_TITLE=hypothetical protein MGC34007 /DEF=Homo sapiens hypothetical protein MGC34007 (MGC34007), mRNA. /FL=gb:NM_153205.1 gb:BC029544.1
1552566_at	18.4	A	13.3	A	24.8	A	27.7	A	29.8	A	25.6	A	350.9	A	3.8	A	9.5	A	4.7	A	3.8	A	5.5	A	gb:NM_144587.1 /DB_XREF=gi:21389372 /TID=Hs2.57772.1 /CNT=5 /FEA=FLmRNA /TIER=FL /STK=3 /LL=118663 /UG_GENE=FLJ25359 /UG=Hs.57772 /UG_TITLE=hypothetical protein FLJ25359 /DEF=Homo sapiens hypothetical protein FLJ25359 (FLJ25359), mRNA. /FL=gb:NM_144587.1
1552568_at	77.9	A	12	A	15.3	A	66.5	A	22.4	A	81.4	A	137.8	A	12.8	A	88.8	A	25.5	A	19.4	A	26.3	A	gb:NM_031440.1 /DB_XREF=gi:13899262 /GEN=TMEM7 /TID=Hs2.196584.1 /CNT=5 /FEA=FLmRNA /TIER=FL /STK=3 /LL=83597 /UG=Hs.196584 /DEF=Homo sapiens transmembrane protein 7 (TMEM7), mRNA. /PROD=transmembrane protein 7 /FL=gb:NM_031440.1
1552569_a_at	41.2	A	25.3	A	16	A	21.2	A	53.4	A	14.5	A	201.3	A	23.9	A	28.3	A	122.2	A	16.7	A	19.4	A	gb:NM_031440.1 /DB_XREF=gi:13899262 /GEN=TMEM7 /TID=Hs2.196584.1 /CNT=5 /FEA=FLmRNA /TIER=FL /STK=3 /LL=83597 /UG=Hs.196584 /DEF=Homo sapiens transmembrane protein 7 (TMEM7), mRNA. /PROD=transmembrane protein 7 /FL=gb:NM_031440.1
1552570_at	23.4	A	14.5	A	32.9	A	3.3	A	67.5	A	4.6	A	54.8	A	62.5	A	15.3	A	84.4	A	8	A	47.7	A	gb:NM_144991.2 /DB_XREF=gi:22001419 /GEN=C21orf29 /TID=Hs2.352217.1 /CNT=8 /FEA=FLmRNA /TIER=FL /STK=3 /LL=54084 /UG=Hs.352217 /DEF=Homo sapiens chromosome 21 open reading frame 29 (C21orf29), mRNA. /PROD=TSP-EAR /FL=gb:NM_144991.2
1552572_a_at	56.5	A	60.4	P	51.9	P	58	P	115.2	P	102.1	P	17.6	A	8.9	A	64	P	3.9	A	19.3	A	5.9	A	gb:NM_138731.1 /DB_XREF=gi:23503324 /GEN=MIPOL1 /TID=Hs2.373533.1 /CNT=6 /FEA=FLmRNA /TIER=FL /STK=3 /LL=145282 /UG=Hs.373533 /DEF=Homo sapiens mirror-image polydactyly gene 1 (MIPOL1), mRNA. /PROD=mirror-image polydactyly gene 1 /FL=gb:AY059470.1 gb:NM_138731.1
1552573_s_at	97.9	A	199.3	P	98.6	A	118.6	A	222.7	P	126.4	A	201.5	A	39.3	A	130.5	A	92.8	A	43.4	A	41.5	A	gb:NM_138731.1 /DB_XREF=gi:23503324 /GEN=MIPOL1 /TID=Hs2.373533.1 /CNT=6 /FEA=FLmRNA /TIER=FL /STK=3 /LL=145282 /UG=Hs.373533 /DEF=Homo sapiens mirror-image polydactyly gene 1 (MIPOL1), mRNA. /PROD=mirror-image polydactyly gene 1 /FL=gb:AY059470.1 gb:NM_138731.1
1552575_a_at	35.5	A	32.8	A	27.2	A	230.5	A	132	A	259.6	A	60.6	A	20	A	143.9	A	1195.3	P	24.8	A	268.3	A	gb:NM_153344.1 /DB_XREF=gi:23503276 /TID=Hs2.98573.1 /CNT=5 /FEA=FLmRNA /TIER=FL /STK=3 /LL=135398 /UG_GENE=MGC46457 /UG=Hs.98573 /UG_TITLE=hypothetical protein MGC46457 /DEF=Homo sapiens hypothetical protein MGC46457 (MGC46457), mRNA. /FL=gb:NM_153344.1
1552576_at	37.6	A	136.1	A	28	A	40.8	A	5.6	A	40.1	A	78.6	A	67.9	A	90.4	A	214.9	A	45.4	A	32.4	A	gb:NM_145300.1 /DB_XREF=gi:21686980 /TID=Hs2.348518.1 /CNT=5 /FEA=FLmRNA /TIER=FL /STK=3 /LL=200420 /UG_GENE=LOC200420 /UG=Hs.348518 /UG_TITLE=LOC200420 /DEF=Homo sapiens LOC200420 (LOC200420), mRNA. /FL=gb:BC014492.1 gb:NM_145300.1
1552578_a_at	96.2	A	88.2	A	7.4	A	5.8	A	38.7	A	18.7	A	37.1	A	21.4	A	75.9	A	66.8	A	76.1	A	6.5	A	gb:NM_138995.1 /DB_XREF=gi:20428778 /GEN=MYO3B /TID=Hs2.352249.1 /CNT=4 /FEA=FLmRNA /TIER=FL /STK=3 /LL=140469 /UG=Hs.352249 /DEF=Homo sapiens myosin IIIB (MYO3B), mRNA. /PROD=myosin IIIB /FL=gb:NM_138995.1 gb:AF369908.1
1552579_a_at	46.5	A	66.8	A	82	A	90.8	A	93.9	A	95.8	P	43.2	A	7.7	A	127.9	A	7.9	A	87.7	A	127.2	A	gb:NM_003813.2 /DB_XREF=gi:15812182 /GEN=ADAM21 /TID=Hs2.178748.1 /CNT=4 /FEA=FLmRNA /TIER=FL /STK=3 /LL=8747 /UG=Hs.178748 /DEF=Homo sapiens a disintegrin and metalloproteinase domain 21 (ADAM21), mRNA. /PROD=a disintegrin and metalloproteinase domain 21preproprotein /FL=gb:NM_003813.2
1552580_at	32	A	9.4	A	19.6	A	255	P	163.4	P	22.2	A	30.2	A	77.3	A	10.3	A	57.8	A	6.1	A	18.1	A	gb:NM_173553.1 /DB_XREF=gi:27734882 /TID=Hs2.276429.1 /CNT=4 /FEA=FLmRNA /TIER=FL /STK=3 /LL=205860 /UG_GENE=FLJ25801 /UG=Hs.276429 /UG_TITLE=hypothetical protein FLJ25801 /DEF=Homo sapiens hypothetical protein FLJ25801 (FLJ25801), mRNA. /FL=gb:NM_173553.1
1552582_at	4	A	11.4	A	4.9	A	14.1	A	14.2	A	23.9	A	84.6	A	19.5	A	26.3	A	54.7	A	28.1	A	54.4	A	gb:NM_172025.1 /DB_XREF=gi:25952073 /GEN=ABCC13 /TID=Hs2.366575.1 /CNT=4 /FEA=FLmRNA /TIER=FL /STK=3 /LL=150000 /UG=Hs.366575 /DEF=Homo sapiens ATP-binding cassette, sub-family C (CFTRMRP), member 13 (ABCC13), transcript variant 4, mRNA. /PROD=ATP-binding cassette protein C13 isoform d /FL=gb:AF518321.1 gb:NM_172025.1
1552583_s_at	57.4	A	23.7	A	22.3	A	37.1	A	7.3	A	13.4	A	160.4	A	27.4	A	134.9	A	11.5	A	19.5	A	59.1	A	gb:NM_172025.1 /DB_XREF=gi:25952073 /GEN=ABCC13 /TID=Hs2.366575.1 /CNT=4 /FEA=FLmRNA /TIER=FL /STK=3 /LL=150000 /UG=Hs.366575 /DEF=Homo sapiens ATP-binding cassette, sub-family C (CFTRMRP), member 13 (ABCC13), transcript variant 4, mRNA. /PROD=ATP-binding cassette protein C13 isoform d /FL=gb:AF518321.1 gb:NM_172025.1
1552584_at	221.8	A	102.3	A	153.4	P	62.6	A	46.9	A	56.6	A	65	A	2.3	A	66.1	A	9.6	A	9.9	A	34.7	A	gb:NM_153701.1 /DB_XREF=gi:24497439 /GEN=IL12RB1 /TID=Hs2.121544.1 /CNT=5 /FEA=FLmRNA /TIER=FL /STK=3 /LL=3594 /UG=Hs.121544 /DEF=Homo sapiens interleukin 12 receptor, beta 1 (IL12RB1), transcript variant 2, mRNA. /PROD=interleukin 12 receptor, beta 1 isoform 2precursor /FL=gb:BC029121.1 gb:NM_153701.1
1552585_s_at	69.1	A	12.6	A	82.2	M	1.9	A	43.5	A	214.9	P	113.4	A	31.3	A	80.3	P	57.1	A	40.7	A	59.5	A	gb:NM_172196.1 /DB_XREF=gi:26787965 /GEN=ALF /TID=Hs2.44385.2 /CNT=3 /FEA=FLmRNA /TIER=FL /STK=3 /LL=11036 /UG=Hs.44385 /DEF=Homo sapiens TFIIA-alphabeta-like factor (ALF), transcript variant 2, mRNA. /PROD=TFIIA-alphabeta-like factor isoform 2 /FL=gb:NM_172196.1
1552586_at	213.7	A	193.5	M	104.9	A	109.2	A	165.7	A	101.3	A	164.7	A	13.2	A	171	A	124.8	A	169.9	A	135.3	A	gb:NM_145068.2 /DB_XREF=gi:22027467 /GEN=TRPV3 /TID=Hs2.375034.1 /CNT=5 /FEA=FLmRNA /TIER=FL /STK=3 /LL=162514 /UG=Hs.375034 /DEF=Homo sapiens transient receptor potential cation channel, subfamily V, member 3 (TRPV3), mRNA. /PROD=transient receptor potential cation channel,subfamily V, member 3 /FL=gb:NM_145068.2 gb:AF514998.1 gb:AY118268.1
1552587_at	4.9	A	68	M	47.3	A	18	A	5.3	A	27.4	A	168.3	P	4	A	55.1	A	15.7	A	77.6	P	55	A	gb:NM_173538.1 /DB_XREF=gi:27734928 /TID=Hs2.246284.1 /CNT=5 /FEA=FLmRNA /TIER=FL /STK=3 /LL=168975 /UG_GENE=FLJ35802 /UG=Hs.246284 /UG_TITLE=hypothetical protein FLJ35802 /DEF=Homo sapiens hypothetical protein FLJ35802 (FLJ35802), mRNA. /FL=gb:NM_173538.1
1552588_a_at	9	A	8	A	4.8	A	2	A	5.8	A	11.6	A	111.7	A	1.3	A	5.7	A	3.2	A	8	A	9.2	A	gb:NM_173538.1 /DB_XREF=gi:27734928 /TID=Hs2.246284.1 /CNT=5 /FEA=FLmRNA /TIER=FL /STK=3 /LL=168975 /UG_GENE=FLJ35802 /UG=Hs.246284 /UG_TITLE=hypothetical protein FLJ35802 /DEF=Homo sapiens hypothetical protein FLJ35802 (FLJ35802), mRNA. /FL=gb:NM_173538.1
1552590_a_at	31.4	A	13.9	A	22.4	A	9.7	A	39.2	A	3.8	A	14	A	6.1	A	72.7	A	14.7	A	63.9	A	27.6	A	gb:NM_145189.1 /DB_XREF=gi:21729889 /GEN=ABCC12 /TID=Hs2.343663.1 /CNT=4 /FEA=FLmRNA /TIER=FL /STK=3 /LL=94160 /UG=Hs.343663 /DEF=Homo sapiens ATP-binding cassette, sub-family C (CFTRMRP), member 12 (ABCC12), transcript variant C, mRNA. /PROD=ATP-binding cassette, sub-family C, member 12isoform c-p1 /FL=gb:NM_033226.1 gb:AF411577.1 gb:NM_145189.1 gb:AY040220.1
1552592_at	10.2	A	20.1	A	44.6	A	12.7	A	7.1	A	65.6	A	30.1	A	2.7	A	1.3	A	9.1	A	44.7	A	23.6	A	gb:NM_147191.1 /DB_XREF=gi:22218340 /GEN=MMP21 /TID=Hs2.314141.1 /CNT=4 /FEA=FLmRNA /TIER=FL /STK=3 /LL=118856 /UG=Hs.314141 /DEF=Homo sapiens matrix metalloproteinase 21 (MMP21), mRNA. /PROD=matrix metalloproteinase 21 /FL=gb:AF520613.1 gb:AF331526.1 gb:NM_147191.1
1552594_at	155.1	A	23.3	A	134.9	A	12.3	A	21.3	A	24.6	A	78.4	A	15.2	A	50.1	A	85.9	A	37.7	A	36	A	gb:NM_139172.1 /DB_XREF=gi:21040262 /TID=Hs2.160436.1 /CNT=4 /FEA=FLmRNA /TIER=FL /STK=3 /LL=147744 /UG_GENE=MDAC1 /UG=Hs.160436 /UG_TITLE=MDAC1 /DEF=Homo sapiens MDAC1 (MDAC1), mRNA. /FL=gb:AF442729.1 gb:NM_139172.1
1552596_at	225.7	A	95.9	A	140.6	A	48.4	A	263.7	A	168.4	A	304.1	A	122.6	A	187.7	A	53.6	A	165.5	A	98.8	A	gb:NM_139285.1 /DB_XREF=gi:21281674 /GEN=GAR17 /TID=Hs2.374672.1 /CNT=3 /FEA=FLmRNA /TIER=FL /STK=3 /LL=246176 /UG=Hs.374672 /DEF=Homo sapiens GAS2-related protein (GAR17), mRNA. /PROD=GAS2-related protein /FL=gb:AF508784.1 gb:NM_139285.1 gb:AF508785.1
1552598_at	142.2	A	113.3	A	87	A	84.8	A	83.7	A	73.9	A	265	A	79.6	A	102.9	A	67.2	A	105.2	A	155.3	A	gb:NM_133490.2 /DB_XREF=gi:27436994 /GEN=KCNG4 /TID=Hs2.335877.1 /CNT=3 /FEA=FLmRNA /TIER=FL /STK=3 /LL=93107 /UG=Hs.335877 /DEF=Homo sapiens potassium voltage-gated channel, subfamily G, member 4 (KCNG4), transcript variant 2, mRNA. /PROD=potassium voltage-gated channel, subfamily G,member 4 isoform 2 /FL=gb:BC008969.1 gb:NM_133490.2
1552599_at	133.9	A	111.4	A	47.4	A	53.6	A	45	A	105.3	A	31.6	A	7.9	A	174.1	A	121.8	A	23.3	A	109.5	A	gb:NM_152990.2 /DB_XREF=gi:24475838 /TID=Hs2.147664.1 /CNT=3 /FEA=FLmRNA /TIER=FL /STK=3 /LL=222659 /UG_GENE=STEPP /UG=Hs.147664 /UG_TITLE=small testis-specific peroxisomal protein /DEF=Homo sapiens small testis-specific peroxisomal protein (STEPP), mRNA. /FL=gb:AF486827.1 gb:NM_152990.2
1552602_at	164.6	A	283.4	A	218.2	A	163.4	A	202	A	262.8	A	223.1	A	103.8	A	335.1	P	250.6	A	267.9	A	239.2	P	gb:NM_145811.1 /DB_XREF=gi:22027550 /GEN=CACNG5 /TID=Hs2.278907.1 /CNT=3 /FEA=FLmRNA /TIER=FL /STK=3 /LL=27091 /UG=Hs.278907 /DEF=Homo sapiens calcium channel, voltage-dependent, gamma subunit 5 (CACNG5), transcript variant 1, mRNA. /PROD=voltage-dependent calcium channel gamma-5subunit isoform a /FL=gb:NM_145811.1 gb:AF361351.1 gb:AF458898.1
1552604_at	112.3	A	110.1	A	37.9	A	72.9	P	114.4	A	139.9	P	163.8	A	35.1	A	200	P	69.6	A	117.7	A	151.4	A	gb:NM_153203.1 /DB_XREF=gi:23397430 /TID=Hs2.352631.1 /CNT=3 /FEA=FLmRNA /TIER=FL /STK=3 /LL=54143 /UG_GENE=C21orf74 /UG=Hs.352631 /UG_TITLE=chromosome 21 open reading frame 74 /DEF=Homo sapiens chromosome 21 open reading frame 74 (C21orf74), mRNA. /FL=gb:NM_153203.1 gb:AY077696.1
1552605_s_at	120	A	73.7	A	73.3	A	26.9	A	83.8	A	7.8	A	129.8	A	60.1	A	110.8	A	12.7	A	140.8	A	107.9	A	gb:NM_153203.1 /DB_XREF=gi:23397430 /TID=Hs2.352631.1 /CNT=3 /FEA=FLmRNA /TIER=FL /STK=3 /LL=54143 /UG_GENE=C21orf74 /UG=Hs.352631 /UG_TITLE=chromosome 21 open reading frame 74 /DEF=Homo sapiens chromosome 21 open reading frame 74 (C21orf74), mRNA. /FL=gb:NM_153203.1 gb:AY077696.1
1552607_at	40.7	A	97.8	A	17.8	A	25.7	A	14.9	A	41.6	A	71.1	A	14.6	A	86.6	A	33.5	A	101.2	A	59.1	A	gb:NM_173168.1 /DB_XREF=gi:27477065 /TID=Hs2.270271.1 /CNT=3 /FEA=FLmRNA /TIER=FL /STK=3 /LL=286967 /UG_GENE=SPCX /UG=Hs.270271 /UG_TITLE=SPCX /DEF=Homo sapiens SPCX (SPCX), mRNA. /FL=gb:AY168775.1 gb:NM_173168.1
1552608_at	20.4	A	22.8	A	21.6	A	8.8	A	113.2	A	132.1	A	80.5	A	84.4	A	31.7	A	22.4	A	20	A	9.7	A	gb:NM_147197.1 /DB_XREF=gi:22218354 /GEN=WFDC11 /TID=Hs2.374924.1 /CNT=3 /FEA=FLmRNA /TIER=FL /STK=3 /LL=259239 /UG=Hs.374924 /DEF=Homo sapiens WAP four-disulfide core domain 11 (WFDC11), mRNA. /PROD=protease inhibitor WAP11 /FL=gb:AY047609.1 gb:NM_147197.1
1552609_s_at	9.1	A	87.9	P	27	A	40.6	A	61.8	A	106	A	229.5	A	66.3	P	118	A	52.5	A	66.4	A	75.1	A	gb:NM_172139.2 /DB_XREF=gi:28144900 /GEN=IL28B /TID=Hs2.406744.1 /CNT=3 /FEA=FLmRNA /TIER=FL /STK=3 /LL=282617 /UG=Hs.406744 /DEF=Homo sapiens interleukin 28B (interferon, lambda 3) (IL28B), mRNA. /PROD=interleukin 28B /FL=gb:NM_172139.2 gb:AY184374.1 gb:AY129149.1
1552610_a_at	1560.9	P	1702.5	P	2013.3	P	1762.5	P	1575.2	P	912.4	P	1733	P	1445.5	P	1073.6	P	1420	P	1912.1	P	1040.4	P	gb:NM_002227.1 /DB_XREF=gi:4504802 /GEN=JAK1 /TID=Hs2.50651.1 /CNT=135 /FEA=FLmRNA /TIER=FL /STK=2 /LL=3716 /UG=Hs.50651 /DEF=Homo sapiens Janus kinase 1 (a protein tyrosine kinase) (JAK1), mRNA. /PROD=janus kinase 1 /FL=gb:M64174.1 gb:NM_002227.1
1552611_a_at	824.9	P	1026.3	P	785.6	P	901.3	P	672.5	P	397.7	P	951.4	P	406.6	P	749.8	P	927.1	P	1080.7	P	483.7	M	gb:AL555086 /DB_XREF=gi:12896484 /DB_XREF=AL555086 /CLONE=CS0DK007YI17 (5 prime) /TID=Hs2.50651.1 /CNT=135 /FEA=FLmRNA /TIER=Stack /STK=12 /LL=3716 /UG_GENE=JAK1 /UG=Hs.50651 /UG_TITLE=Janus kinase 1 (a protein tyrosine kinase) /FL=gb:M64174.1 gb:NM_002227.1
1552612_at	675.1	P	753.2	P	500.1	P	762.8	P	1244.7	P	890.2	P	636.4	P	408.8	P	566.5	P	584.8	P	744.6	P	332	P	gb:NM_020240.1 /DB_XREF=gi:9910377 /GEN=SPEC2 /TID=Hs2.406704.1 /CNT=35 /FEA=FLmRNA /TIER=FL /STK=2 /LL=56990 /UG=Hs.406704 /DEF=Homo sapiens non-kinase Cdc42 effector protein SPEC2 (SPEC2), mRNA. /PROD=non-kinase Cdc42 effector protein SPEC2 /FL=gb:AF189692.1 gb:NM_020240.1
1552613_s_at	493.5	P	510.3	P	579.9	P	351.6	P	868.3	P	774.9	P	268.2	P	288.7	P	353.8	P	438.9	P	364	P	168.8	P	gb:NM_020240.1 /DB_XREF=gi:9910377 /GEN=SPEC2 /TID=Hs2.406704.1 /CNT=35 /FEA=FLmRNA /TIER=FL /STK=2 /LL=56990 /UG=Hs.406704 /DEF=Homo sapiens non-kinase Cdc42 effector protein SPEC2 (SPEC2), mRNA. /PROD=non-kinase Cdc42 effector protein SPEC2 /FL=gb:AF189692.1 gb:NM_020240.1
1552615_at	854	A	452.1	A	99.7	A	306.5	A	463.6	A	328.1	A	1529.6	A	463.9	A	536.6	A	675.7	A	890.6	A	217.2	A	gb:NM_001093.1 /DB_XREF=gi:4501854 /GEN=ACACB /TID=Hs2.183857.1 /CNT=45 /FEA=FLmRNA /TIER=FL /STK=2 /LL=32 /UG=Hs.183857 /DEF=Homo sapiens acetyl-Coenzyme A carboxylase beta (ACACB), mRNA. /PROD=acetyl-Coenzyme A carboxylase beta /FL=gb:NM_001093.1 gb:U89344.1
1552616_a_at	63.4	A	21.7	A	25.9	A	18.3	A	16.7	A	17.5	A	29.9	A	9	A	12.5	A	15.1	A	170.6	A	17.7	A	gb:NM_001093.1 /DB_XREF=gi:4501854 /GEN=ACACB /TID=Hs2.183857.1 /CNT=45 /FEA=FLmRNA /TIER=FL /STK=2 /LL=32 /UG=Hs.183857 /DEF=Homo sapiens acetyl-Coenzyme A carboxylase beta (ACACB), mRNA. /PROD=acetyl-Coenzyme A carboxylase beta /FL=gb:NM_001093.1 gb:U89344.1
1552617_a_at	1054.5	P	1299.9	P	1437.9	P	2700.4	P	2422.6	P	1612	P	634.9	P	1206.3	P	1457	P	1122.2	P	736.2	P	1190.7	P	gb:NM_022457.4 /DB_XREF=gi:21359962 /TID=Hs2.105737.1 /CNT=61 /FEA=FLmRNA /TIER=FL /STK=2 /LL=64326 /UG_GENE=COP1 /UG=Hs.105737 /UG_TITLE=constitutive photomorphogenic protein /DEF=Homo sapiens constitutive photomorphogenic protein (COP1), mRNA. /FL=gb:AF508940.1 gb:NM_022457.4
1552618_at	957.5	P	1321	P	922.1	P	1738.4	P	1451.5	P	1403.2	P	1144.7	P	933.7	P	939.1	P	785.6	P	539.4	P	489.5	P	gb:NM_005819.2 /DB_XREF=gi:19923773 /GEN=STX6 /TID=Hs2.157144.1 /CNT=29 /FEA=FLmRNA /TIER=FL /STK=2 /LL=10228 /UG=Hs.157144 /DEF=Homo sapiens syntaxin 6 (STX6), mRNA. /PROD=syntaxin 6 /FL=gb:AJ002078.1 gb:BC009944.1 gb:NM_005819.2
1552619_a_at	2108.3	P	2401.3	P	224.6	P	4246.1	P	1841.3	P	186.9	P	717	P	5639.1	P	13200.4	P	7966.2	P	5358.4	P	6199	P	gb:NM_018685.1 /DB_XREF=gi:8923831 /GEN=ANLN /TID=Hs2.62180.1 /CNT=64 /FEA=FLmRNA /TIER=FL /STK=2 /LL=54443 /UG=Hs.62180 /DEF=Homo sapiens anillin, actin binding protein (scraps homolog, Drosophila) (ANLN), mRNA. /PROD=anillin, actin binding protein (scraps homolog,Drosophila) /FL=gb:NM_018685.1 gb:AF273437.1
1552620_at	715.5	A	419.3	A	366	P	336.1	A	584.9	A	324	A	492.1	A	379.3	A	513.2	A	587.4	A	577.1	A	252.1	A	gb:NM_173080.1 /DB_XREF=gi:27436868 /GEN=SPRR4 /TID=Hs2.433629.1 /CNT=27 /FEA=FLmRNA /TIER=FL /STK=2 /LL=163778 /UG=Hs.433629 /DEF=Homo sapiens small proline rich protein 4 (SPRR4), mRNA. /PROD=small proline rich protein 4 /FL=gb:NM_173080.1
1552621_at	484	P	457.5	P	717.5	P	729.6	P	695	P	954.6	P	716.9	P	432.3	P	1273.4	P	664.3	P	263.2	P	782.9	P	gb:BQ613856 /DB_XREF=gi:21603525 /DB_XREF=il16d04.x1 /CLONE=IMAGE:6030007 /TID=Hs2.375569.1 /CNT=38 /FEA=FLmRNA /TIER=ConsEnd /STK=1 /LL=246721 /UG_GENE=POLR2J2 /UG=Hs.375569 /UG_TITLE=DNA directed RNA polymerase II polypeptide J-related gene /FL=gb:NM_145325.1 gb:AF468111.1
1552622_s_at	339.7	P	295.7	P	548.1	P	605.5	P	481.5	P	709.2	P	714.3	P	282.6	P	820.1	P	525.5	P	203.6	P	630.3	P	gb:BQ613856 /DB_XREF=gi:21603525 /DB_XREF=il16d04.x1 /CLONE=IMAGE:6030007 /TID=Hs2.375569.1 /CNT=38 /FEA=FLmRNA /TIER=ConsEnd /STK=1 /LL=246721 /UG_GENE=POLR2J2 /UG=Hs.375569 /UG_TITLE=DNA directed RNA polymerase II polypeptide J-related gene /FL=gb:NM_145325.1 gb:AF468111.1
1552623_at	6.7	A	11.2	A	6	A	7.2	A	6.1	A	4.1	A	23.7	A	6.2	A	15	A	9.7	A	13.8	A	4.9	A	gb:BC025237.1 /DB_XREF=gi:19263639 /TID=Hs2.204959.1 /CNT=36 /FEA=FLmRNA /TIER=FL /STK=2 /LL=84941 /UG_GENE=HSH2 /UG=Hs.204959 /DEF=Homo sapiens, hematopoietic SH2 protein, clone MGC:39089 IMAGE:4853087, mRNA, complete cds. /PROD=hematopoietic SH2 protein /FL=gb:NM_032855.1 gb:BC025237.1
1552625_a_at	441.6	P	326.9	P	341.4	P	1061	P	223.6	P	570.4	P	334.6	P	179.1	P	408.6	P	272.7	P	178.1	P	342.5	P	gb:AB063105.1 /DB_XREF=gi:16416450 /GEN=hMtCCA /TID=Hs2.102897.1 /CNT=34 /FEA=FLmRNA /TIER=FL /STK=2 /LL=51095 /UG=Hs.102897 /DEF=Homo sapiens hMtCCA mRNA for tRNA-nucleotidyltransferase, complete cds. /PROD=tRNA-nucleotidyltransferase /FL=gb:BC012537.1 gb:AF151805.1 gb:NM_016000.2 gb:AB063105.1
1552626_a_at	30.6	A	61.5	A	115.2	A	764.3	P	320.3	A	163	A	251	A	45.6	A	67.6	A	247	A	848.1	P	88.1	A	gb:NM_030923.1 /DB_XREF=gi:24308308 /TID=Hs2.331633.1 /CNT=33 /FEA=FLmRNA /TIER=FL /STK=2 /LL=81615 /UG_GENE=DKFZP566N034 /UG=Hs.331633 /UG_TITLE=hypothetical protein DKFZp566N034 /DEF=Homo sapiens hypothetical protein DKFZp566N034 (DKFZP566N034), mRNA. /FL=gb:NM_030923.1 gb:BC026170.1
1552627_a_at	669.7	P	744.3	P	521.6	P	421.4	P	345.9	P	616.8	P	927.7	P	259.7	P	453.5	P	1227.6	P	570.8	P	473.4	P	gb:NM_001173.1 /DB_XREF=gi:4502220 /GEN=ARHGAP5 /TID=Hs2.267831.1 /CNT=55 /FEA=FLmRNA /TIER=FL /STK=2 /LL=394 /UG=Hs.267831 /DEF=Homo sapiens Rho GTPase activating protein 5 (ARHGAP5), mRNA. /PROD=Rho GTPase activating protein 5 /FL=gb:NM_001173.1 gb:U17032.1
1552628_a_at	748.6	P	544	P	1237.3	P	1237.4	P	1094.1	P	1023.1	P	1475.4	P	1069.8	P	1410.8	P	898.6	P	993.6	P	1179.5	P	gb:NM_022373.2 /DB_XREF=gi:19923833 /TID=Hs2.30211.1 /CNT=37 /FEA=FLmRNA /TIER=FL /STK=2 /LL=64224 /UG_GENE=FLJ22313 /UG=Hs.30211 /UG_TITLE=hypothetical protein FLJ22313 /DEF=Homo sapiens hypothetical protein FLJ22313 (FLJ22313), mRNA. /FL=gb:BC005091.1 gb:NM_022373.2
1552629_a_at	48.3	A	17.7	A	7	A	21.8	A	15	A	8.6	A	20.2	A	4	A	12.7	A	13	A	18.2	A	5.4	A	gb:NM_015167.1 /DB_XREF=gi:23943859 /GEN=PTDSR /TID=Hs2.72660.1 /CNT=21 /FEA=FLmRNA /TIER=FL /STK=2 /LL=23210 /UG=Hs.72660 /DEF=Homo sapiens phosphatidylserine receptor (PTDSR), mRNA. /PROD=phosphatidylserine receptor /FL=gb:AB073711.1 gb:NM_015167.1
1552630_a_at	203.8	A	28.5	A	293.5	A	393.8	A	233.8	A	53.5	A	59.8	A	252.5	A	45.8	A	115.4	A	188.1	A	233.9	A	gb:NM_006662.1 /DB_XREF=gi:5730066 /GEN=SRCAP /TID=Hs2.87908.1 /CNT=41 /FEA=FLmRNA /TIER=FL /STK=2 /LL=10847 /UG=Hs.87908 /DEF=Homo sapiens Snf2-related CBP activator protein (SRCAP), mRNA. /PROD=Snf2-related CBP activator protein /FL=gb:NM_006662.1 gb:AF143946.1
1552631_a_at	235	P	260.7	P	208	P	111.3	A	188.2	A	32.3	A	138.9	A	250.1	P	321.4	P	233.5	P	245.7	P	246.6	P	gb:NM_145319.1 /DB_XREF=gi:24497523 /GEN=MAP3K6 /TID=Hs2.194694.2 /CNT=38 /FEA=FLmRNA /TIER=FL /STK=2 /LL=9064 /UG=Hs.194694 /DEF=Homo sapiens mitogen-activated protein kinase kinase kinase 6 (MAP3K6), transcript variant 2, mRNA. /PROD=mitogen-activated protein kinase kinase kinase 6isoform 2 /FL=gb:NM_145319.1 gb:BC015914.1
1552632_a_at	621.2	P	371.4	P	699.4	P	29.3	A	631.6	P	188.4	P	170.2	A	321.9	P	61.6	A	124	P	758.9	P	105.6	M	gb:BC012375.1 /DB_XREF=gi:15214501 /TID=Hs2.279937.1 /CNT=31 /FEA=FLmRNA /TIER=FL /STK=2 /LL=22901 /UG_GENE=KIAA1001 /UG=Hs.279937 /DEF=Homo sapiens, Similar to KIAA1001 protein, clone MGC:8996 IMAGE:3882163, mRNA, complete cds. /PROD=Similar to KIAA1001 protein /FL=gb:AB023218.1 gb:NM_014960.1 gb:BC012375.1
1552633_at	98.7	A	79	A	27	A	114.9	P	135.5	A	125.7	P	118.8	A	89.2	P	139.8	P	89.8	A	76	A	58.7	A	gb:NM_033204.2 /DB_XREF=gi:24475858 /TID=Hs2.164284.1 /CNT=21 /FEA=FLmRNA /TIER=FL /STK=2 /LL=94039 /UG_GENE=HZF12 /UG=Hs.164284 /UG_TITLE=zinc finger protein 12 /DEF=Homo sapiens zinc finger protein 12 (HZF12), mRNA. /FL=gb:NM_033204.2 gb:BC011502.1 gb:AY149174.1
1552634_a_at	89	P	91.7	P	44.6	A	41.3	A	130	P	117.5	P	58	A	137.2	P	108.1	P	68	A	164.4	P	156.6	P	gb:NM_033204.2 /DB_XREF=gi:24475858 /TID=Hs2.164284.1 /CNT=21 /FEA=FLmRNA /TIER=FL /STK=2 /LL=94039 /UG_GENE=HZF12 /UG=Hs.164284 /UG_TITLE=zinc finger protein 12 /DEF=Homo sapiens zinc finger protein 12 (HZF12), mRNA. /FL=gb:NM_033204.2 gb:BC011502.1 gb:AY149174.1
1552637_at	150.7	P	74.9	A	59	A	91.9	A	51.7	A	23.7	A	126.4	A	40.6	A	74.8	A	100.4	M	63.2	A	55.8	A	gb:NM_080601.1 /DB_XREF=gi:18375643 /GEN=PTPN11 /TID=Hs2.22868.1 /CNT=20 /FEA=FLmRNA /TIER=FL /STK=2 /LL=5781 /UG=Hs.22868 /DEF=Homo sapiens protein tyrosine phosphatase, non-receptor type 11 (PTPN11), transcript variant 2, mRNA. /PROD=protein tyrosine phosphatase, non-receptor type11, isoform 2 /FL=gb:BC008692.1 gb:NM_080601.1
1552639_at	55.7	A	52	A	193.3	A	76.3	A	592.7	P	543.1	P	422.9	A	76.2	A	30.7	A	42.9	A	53.3	A	27.5	A	gb:NM_138433.1 /DB_XREF=gi:23821016 /TID=Hs2.343245.1 /CNT=17 /FEA=FLmRNA /TIER=FL /STK=2 /LL=113730 /UG_GENE=LOC113730 /UG=Hs.343245 /UG_TITLE=hypothetical protein BC009980 /DEF=Homo sapiens hypothetical protein BC009980 (LOC113730), mRNA. /FL=gb:NM_138433.1 gb:BC009980.1
1552641_s_at	773.4	A	1151.9	A	1152.9	P	721.1	A	1081.2	A	741.3	A	343.1	A	2595.3	P	694.8	A	1925.2	P	1210.3	P	760.1	A	gb:NM_031921.1 /DB_XREF=gi:13994293 /GEN=TOB3 /TID=Hs2.380162.1 /CNT=17 /FEA=FLmRNA /TIER=FL /STK=2 /LL=83858 /UG=Hs.380162 /DEF=Homo sapiens AAA-ATPase TOB3 (TOB3), mRNA. /PROD=AAA-ATPase TOB3 /FL=gb:NM_031921.1 gb:AF343078.1
1552643_at	338.8	A	288.9	A	200.1	A	133.3	A	399.7	A	134.7	A	509.4	A	159.2	A	66.5	A	91.7	A	101.6	A	120.8	A	gb:NM_145297.1 /DB_XREF=gi:21699081 /TID=Hs2.334568.1 /CNT=17 /FEA=FLmRNA /TIER=FL /STK=2 /LL=199777 /UG_GENE=LOC199777 /UG=Hs.334568 /UG_TITLE=similar to DNA-binding protein; zinc finger protein 253 /DEF=Homo sapiens similar to DNA-binding protein; zinc finger protein 253 (LOC199777), mRNA. /FL=gb:BC007116.1 gb:NM_145297.1
1552644_a_at	127	P	181.4	P	147.5	P	135	P	191.2	P	32	A	109.9	A	88.4	P	146.2	A	124.7	P	114.7	P	143.6	P	gb:NM_024947.2 /DB_XREF=gi:21359977 /GEN=PHC3 /TID=Hs2.231977.1 /CNT=27 /FEA=FLmRNA /TIER=FL /STK=2 /LL=80012 /UG=Hs.231977 /DEF=Homo sapiens polyhomeotic like 3 (Drosophila) (PHC3), mRNA. /PROD=polyhomeotic like 3 /FL=gb:AF380154.1 gb:NM_024947.2
1552646_at	471.2	A	562.2	A	275.6	A	97.1	A	368.8	A	179.9	A	486.4	A	203.9	A	404.8	A	456.4	A	424.3	A	398.9	A	gb:NM_147162.1 /DB_XREF=gi:22212921 /GEN=IL11RA /TID=Hs2.64310.2 /CNT=25 /FEA=FLmRNA /TIER=FL /STK=2 /LL=3590 /UG=Hs.64310 /DEF=Homo sapiens interleukin 11 receptor, alpha (IL11RA), transcript variant 2, mRNA. /PROD=interleukin 11 receptor, alpha isoform 2precursor /FL=gb:NM_147162.1
1552648_a_at	25.4	A	8.3	A	14	A	30.9	A	1119.1	P	45	A	185.3	A	6.5	A	23	A	74.2	A	34.6	A	81.1	A	gb:NM_003844.2 /DB_XREF=gi:21361085 /GEN=TNFRSF10A /TID=Hs2.249190.1 /CNT=23 /FEA=FLmRNA /TIER=FL /STK=2 /LL=8797 /UG=Hs.249190 /DEF=Homo sapiens tumor necrosis factor receptor superfamily, member 10a (TNFRSF10A), mRNA. /PROD=tumor necrosis factor receptor superfamily,member 10a /FL=gb:BC012866.1 gb:U90875.1 gb:NM_003844.2
1552649_a_at	35.9	A	67.8	A	64.1	A	178.7	P	258.7	P	42.1	A	176.6	A	7.2	A	60.4	A	101.6	A	78	A	145.2	A	gb:NM_057178.1 /DB_XREF=gi:17432432 /GEN=LOC117584 /TID=Hs2.172694.1 /CNT=19 /FEA=FLmRNA /TIER=FL /STK=2 /LL=117584 /UG=Hs.172694 /DEF=Homo sapiens fring (LOC117584), mRNA. /PROD=fring /FL=gb:AF434816.1 gb:NM_057178.1
1552651_a_at	178.8	A	124	A	73.1	A	385.4	P	319.2	A	25.6	A	295.4	A	137.8	A	117.6	A	209.1	A	70.9	A	133	A	gb:AK093112.1 /DB_XREF=gi:21751877 /TID=Hs2.172694.1 /CNT=19 /FEA=FLmRNA /TIER=ConsEnd /STK=0 /LL=117584 /UG_GENE=LOC117584 /UG=Hs.172694 /UG_TITLE=fring /DEF=Homo sapiens cDNA FLJ35793 fis, clone TESTI2005784, weakly similar to INHIBITOR OF APOPTOSIS PROTEIN. /FL=gb:AF434816.1 gb:NM_057178.1
1552652_at	669.5	P	580.5	P	533.5	P	259.4	P	138.4	P	280	P	639.6	P	1187.8	P	316.5	P	144.9	P	932.9	P	196.5	P	gb:NM_152843.1 /DB_XREF=gi:23110973 /GEN=HPS4 /TID=Hs2.6657.2 /CNT=38 /FEA=FLmRNA /TIER=FL /STK=2 /LL=89781 /UG=Hs.6657 /DEF=Homo sapiens Hermansky-Pudlak syndrome 4 (HPS4), transcript variant 4, mRNA. /PROD=light ear protein isoform d /FL=gb:NM_152843.1
1552656_s_at	370.3	P	604.9	P	402.9	P	1384.4	P	660	P	727	P	419.5	A	279.6	P	693.1	P	535.9	P	582.9	P	226.9	P	gb:NM_144624.1 /DB_XREF=gi:21389438 /GEN=KIS /TID=Hs2.127310.1 /CNT=15 /FEA=FLmRNA /TIER=FL /STK=2 /LL=127933 /UG=Hs.127310 /DEF=Homo sapiens kinase interacting with leukemia-associated gene (stathmin) (KIS), mRNA. /PROD=kinase interacting stathmin /FL=gb:NM_144624.1 gb:BC026046.1
1552657_a_at	73.8	A	69.6	A	10.4	A	49	A	20.5	A	58.5	A	192.3	A	96.3	A	141.1	A	12	A	139.8	A	229	A	gb:NM_032243.2 /DB_XREF=gi:18875315 /GEN=TXNDC2 /TID=Hs2.98712.1 /CNT=14 /FEA=FLmRNA /TIER=FL /STK=2 /LL=84203 /UG=Hs.98712 /DEF=Homo sapiens thioredoxin domain containing 2 (spermatozoa) (TXNDC2), mRNA. /PROD=thioredoxin domain-containing 2 /FL=gb:AF080095.1 gb:NM_032243.2
1552658_a_at	136.9	M	213.2	P	372	P	607.1	P	120.9	P	189.4	P	990.9	P	423.6	P	401.8	P	258.4	P	895.7	P	77.8	A	gb:NM_014903.2 /DB_XREF=gi:27734089 /GEN=NAV3 /TID=Hs2.174188.1 /CNT=31 /FEA=FLmRNA /TIER=FL /STK=2 /LL=89795 /UG=Hs.174188 /DEF=Homo sapiens neuron navigator 3 (NAV3), mRNA. /PROD=neuron navigator 3 /FL=gb:NM_014903.2
1552660_a_at	1545.1	P	1600.5	P	3225.8	P	2216.1	P	1295.6	P	2215.1	P	1570.7	P	1320.9	P	1515.1	P	1500.9	P	2808.4	P	689.3	P	gb:BC021215.1 /DB_XREF=gi:18203780 /TID=Hs2.151046.1 /CNT=29 /FEA=FLmRNA /TIER=FL /STK=1 /LL=55322 /UG_GENE=FLJ11193 /UG=Hs.151046 /DEF=Homo sapiens, clone MGC:12584 IMAGE:4302543, mRNA, complete cds. /PROD=Unknown (protein for MGC:12584) /FL=gb:NM_018356.1 gb:BC021215.1
1552661_at	0.6	A	34.6	A	2.8	A	27.4	A	0.9	A	21.5	A	5.3	A	1.5	A	1.4	A	12.3	A	11.5	A	1.5	A	gb:NM_032101.1 /DB_XREF=gi:14270507 /GEN=PCDHGB7 /TID=Hs2.256783.1 /CNT=21 /FEA=FLmRNA /TIER=FL /STK=2 /LL=56099 /UG=Hs.256783 /DEF=Homo sapiens protocadherin gamma subfamily B, 7 (PCDHGB7), transcript variant 2, mRNA. /PROD=protocadherin gamma subfamily B, 7, isoform 2precursor /FL=gb:AF152523.1 gb:NM_032101.1
1552662_a_at	136.8	A	17.6	A	85.2	A	41.7	A	178.7	A	79.7	A	79.9	A	96.7	A	6.7	A	17	A	141.1	A	38.8	A	gb:NM_032101.1 /DB_XREF=gi:14270507 /GEN=PCDHGB7 /TID=Hs2.256783.1 /CNT=21 /FEA=FLmRNA /TIER=FL /STK=2 /LL=56099 /UG=Hs.256783 /DEF=Homo sapiens protocadherin gamma subfamily B, 7 (PCDHGB7), transcript variant 2, mRNA. /PROD=protocadherin gamma subfamily B, 7, isoform 2precursor /FL=gb:AF152523.1 gb:NM_032101.1
1552663_a_at	705	A	831.1	A	762.4	P	640.2	M	503.9	A	492.6	A	447.4	A	531.1	P	548.3	A	603.3	A	1194.7	P	454	A	gb:NM_015064.1 /DB_XREF=gi:14149660 /GEN=ELKS /TID=Hs2.293705.1 /CNT=33 /FEA=FLmRNA /TIER=FL /STK=2 /LL=23085 /UG=Hs.293705 /DEF=Homo sapiens ELKS protein (ELKS), mRNA. /PROD=ELKS protein /FL=gb:AB015617.1 gb:NM_015064.1
1552664_at	1640.5	P	974.7	P	332.5	P	309.8	P	327	P	282.3	P	391.5	P	521.8	P	891.2	P	579.9	P	382.8	P	862.3	P	gb:NM_144997.2 /DB_XREF=gi:22907033 /GEN=BHD /TID=Hs2.172702.2 /CNT=27 /FEA=FLmRNA /TIER=FL /STK=2 /LL=201163 /UG=Hs.172702 /DEF=Homo sapiens folliculin (BHD), transcript variant 1, mRNA. /PROD=folliculin isoform 1 /FL=gb:AF517523.1 gb:NM_144997.2
1552665_at	30.8	A	130	A	122.6	A	125.6	A	60.2	A	156.5	A	137.4	A	41.7	A	116.4	A	112.3	A	118.1	A	150.6	P	gb:NM_032903.1 /DB_XREF=gi:14249673 /TID=Hs2.122655.1 /CNT=17 /FEA=FLmRNA /TIER=FL /STK=2 /LL=84989 /UG_GENE=MGC14425 /UG=Hs.122655 /UG_TITLE=hypothetical protein MGC14425 /DEF=Homo sapiens hypothetical protein MGC14425 (MGC14425), mRNA. /FL=gb:BC007866.1 gb:NM_032903.1
1552666_a_at	31.3	A	116.8	A	10.9	A	32.6	A	12.2	A	95	A	102.4	A	10.4	A	48.9	A	39.4	A	40.2	A	4.8	A	gb:NM_020794.1 /DB_XREF=gi:16904382 /GEN=KIAA1365 /TID=Hs2.157325.1 /CNT=13 /FEA=FLmRNA /TIER=FL /STK=2 /LL=57554 /UG=Hs.157325 /DEF=Homo sapiens densin-180 (KIAA1365), mRNA. /PROD=densin-180 /FL=gb:AF434715.1 gb:NM_020794.1
1552667_a_at	38.5	A	20.5	A	21.4	A	24.6	A	20.1	A	24.6	A	105.5	A	20.6	A	28.3	A	36.3	A	84.3	A	15.5	A	gb:NM_005489.1 /DB_XREF=gi:4885526 /GEN=SH2D3C /TID=Hs2.26054.1 /CNT=12 /FEA=FLmRNA /TIER=FL /STK=2 /LL=10044 /UG=Hs.26054 /DEF=Homo sapiens SH2 domain containing 3C (SH2D3C), mRNA. /PROD=SH2 domain containing 3C /FL=gb:NM_005489.1 gb:AF124251.1
1552669_at	7.2	A	57	A	141.2	A	89.2	A	24.6	A	48.4	A	123	A	20.9	A	62.9	A	45	A	95.8	A	67.7	A	gb:NM_024607.1 /DB_XREF=gi:13375814 /TID=Hs2.28329.1 /CNT=25 /FEA=FLmRNA /TIER=FL /STK=0 /LL=79660 /UG_GENE=PPP1R3B /UG=Hs.28329 /UG_TITLE=protein phosphatase 1, regulatory (inhibitor) subunit 3B /DEF=Homo sapiens protein phosphatase 1, regulatory (inhibitor) subunit 3B (PPP1R3B), mRNA. /FL=gb:BC043388.1 gb:NM_024607.1
1552670_a_at	220.1	P	194	P	70	A	264.4	P	145.6	A	164	P	267.3	P	191.7	P	143.5	P	237.1	P	381.2	P	205.9	P	gb:NM_024607.1 /DB_XREF=gi:13375814 /TID=Hs2.28329.1 /CNT=25 /FEA=FLmRNA /TIER=FL /STK=0 /LL=79660 /UG_GENE=PPP1R3B /UG=Hs.28329 /UG_TITLE=protein phosphatase 1, regulatory (inhibitor) subunit 3B /DEF=Homo sapiens protein phosphatase 1, regulatory (inhibitor) subunit 3B (PPP1R3B), mRNA. /FL=gb:BC043388.1 gb:NM_024607.1
1552671_a_at	15.3	A	25.1	A	97.9	A	260.7	P	178.4	A	30.9	A	31.1	A	15.4	A	223.2	A	283.9	A	15.7	A	270.1	P	gb:NM_032591.1 /DB_XREF=gi:14211918 /GEN=SLC9A7 /TID=Hs2.154353.1 /CNT=22 /FEA=FLmRNA /TIER=FL /STK=2 /LL=84679 /UG=Hs.154353 /DEF=Homo sapiens solute carrier family 9 (sodiumhydrogen exchanger), isoform 7 (SLC9A7), mRNA. /PROD=solute carrier family 9, member 7 /FL=gb:NM_032591.1 gb:AF298591.1
1552672_a_at	351.8	A	391.6	A	59.9	A	20.2	A	28.4	A	239.5	A	41.4	A	321.8	A	152.5	A	648.2	M	198.1	A	194.5	A	gb:NM_001542.1 /DB_XREF=gi:4504626 /GEN=IGSF3 /TID=Hs2.81234.1 /CNT=16 /FEA=FLmRNA /TIER=FL /STK=2 /LL=3321 /UG=Hs.81234 /DEF=Homo sapiens immunoglobulin superfamily, member 3 (IGSF3), mRNA. /PROD=immunoglobulin superfamily, member 3 /FL=gb:NM_001542.1 gb:AF031174.1
1552673_at	13.8	A	9.8	A	11.2	A	3.2	A	3	A	6	A	22.6	A	4.8	A	12.4	A	8.8	A	4.8	A	8.7	A	gb:NM_173560.1 /DB_XREF=gi:27734870 /TID=Hs2.352276.1 /CNT=14 /FEA=FLmRNA /TIER=FL /STK=2 /LL=222546 /UG_GENE=MGC33442 /UG=Hs.352276 /UG_TITLE=hypothetical protein MGC33442 /DEF=Homo sapiens hypothetical protein MGC33442 (MGC33442), mRNA. /FL=gb:NM_173560.1 gb:BC039248.1
1552674_at	21.9	A	58.4	A	21	A	22.4	A	61.8	A	47.5	A	274.6	A	8.6	A	47.5	A	17.8	A	16.7	A	64.9	A	gb:NM_052952.1 /DB_XREF=gi:16418442 /TID=Hs2.170656.1 /CNT=13 /FEA=FLmRNA /TIER=FL /STK=2 /LL=116093 /UG_GENE=DIRC1 /UG=Hs.170656 /UG_TITLE=disrupted in renal carcinoma 1 /DEF=Homo sapiens disrupted in renal carcinoma 1 (DIRC1), mRNA. /FL=gb:NM_052952.1 gb:AY039011.1
1552675_at	2.9	A	5.9	A	2.2	A	45	A	65.6	A	87.8	A	47.7	A	27.5	A	3.1	A	17.5	A	26.4	A	4	A	gb:NM_145174.1 /DB_XREF=gi:21553334 /TID=Hs2.20414.1 /CNT=12 /FEA=FLmRNA /TIER=FL /STK=2 /LL=150353 /UG_GENE=HSC3 /UG=Hs.20414 /UG_TITLE=HSC3 /DEF=Homo sapiens HSC3 (HSC3), mRNA. /FL=gb:AF085232.1 gb:NM_145174.1
1552676_at	306.7	A	228.3	A	97.4	A	132.4	A	149.1	A	298.4	A	313.5	A	166.9	A	315.4	A	341.3	P	225.4	M	274.5	A	gb:NM_053049.1 /DB_XREF=gi:16596691 /GEN=SPC /TID=Hs2.343668.1 /CNT=11 /FEA=FLmRNA /TIER=FL /STK=2 /LL=114131 /UG=Hs.343668 /DEF=Homo sapiens stresscopin (SPC), mRNA. /PROD=stresscopin /FL=gb:AY026949.1 gb:NM_053049.1
1552677_a_at	194.9	A	142.7	A	117.1	A	189.3	A	310.1	A	58.7	A	277.5	A	80.5	A	110	A	244.6	A	321.1	A	83.1	A	gb:NM_015151.1 /DB_XREF=gi:24308002 /GEN=DIP2 /TID=Hs2.322903.1 /CNT=28 /FEA=FLmRNA /TIER=FL /STK=2 /LL=23181 /UG=Hs.322903 /DEF=Homo sapiens disco-interacting protein 2 (Drosophila) homolog (DIP2), mRNA. /PROD=disco-interacting protein 2 (Drosophila)homolog /FL=gb:AF490768.1 gb:NM_015151.1
1552678_a_at	671.6	A	563.4	A	438.5	M	197.5	A	459.4	A	254.7	A	653.9	A	178.2	A	626.5	P	665.3	M	293	A	294.3	A	gb:NM_020886.1 /DB_XREF=gi:16507199 /GEN=USP28 /TID=Hs2.142856.1 /CNT=28 /FEA=FLmRNA /TIER=FL /STK=2 /LL=57646 /UG=Hs.142856 /DEF=Homo sapiens ubiquitin specific protease 28 (USP28), mRNA. /PROD=ubiquitin specific protease 28 /FL=gb:AF266283.1 gb:NM_020886.1
1552680_a_at	288.3	A	215.6	A	56.3	A	196.9	A	344.9	A	112.8	A	278.7	A	207	A	281.4	A	292.1	A	236.1	A	209.3	A	gb:NM_020380.2 /DB_XREF=gi:24475852 /GEN=AF15Q14 /TID=Hs2.283099.2 /CNT=10 /FEA=FLmRNA /TIER=FL /STK=2 /LL=57082 /UG=Hs.283099 /DEF=Homo sapiens AF15q14 protein (AF15Q14), mRNA. /PROD=AF15q14 protein /FL=gb:AF461041.1 gb:AB022190.1 gb:NM_020380.2 gb:NM_144508.1
1552682_a_at	147	P	207.9	P	37.1	A	38.7	A	265	P	26.2	A	138.5	A	157.9	P	297.3	P	197.9	P	198	P	150.3	P	gb:NM_144508.1 /DB_XREF=gi:24476009 /GEN=AF15Q14 /TID=Hs2.283099.2 /CNT=10 /FEA=FLmRNA /TIER=FL /STK=2 /LL=57082 /UG=Hs.283099 /DEF=Homo sapiens AF15q14 protein (AF15Q14), mRNA. /PROD=AF15q14 protein isoform 2 /FL=gb:AF461041.1 gb:AB022190.1 gb:NM_020380.2 gb:NM_144508.1
1552684_a_at	172.8	A	212.2	A	144.1	P	108.1	P	179.5	A	124.2	A	98.8	A	37	A	62	A	211.3	M	120.6	A	133	M	gb:NM_145204.1 /DB_XREF=gi:21624649 /GEN=SENP8 /TID=Hs2.111991.1 /CNT=10 /FEA=FLmRNA /TIER=FL /STK=2 /LL=123228 /UG=Hs.111991 /DEF=Homo sapiens sentrinSUMO-specific protease SENP8 (SENP8), mRNA. /PROD=sentrinSUMO-specific protease SENP8 /FL=gb:AY008293.1 gb:NM_145204.1
1552685_a_at	56.9	A	182.9	A	104.1	A	68.9	A	99.3	A	84.9	A	53.6	A	74	A	145.1	A	22	A	147.5	A	105.7	A	gb:NM_014552.1 /DB_XREF=gi:7657296 /GEN=LBP-32 /TID=Hs2.321264.1 /CNT=18 /FEA=FLmRNA /TIER=FL /STK=2 /LL=29841 /UG=Hs.321264 /DEF=Homo sapiens LBP protein 32 (LBP-32), mRNA. /PROD=LBP protein 32 /FL=gb:AF198489.1 gb:NM_014552.1
1552686_at	150.9	A	10.5	A	33.2	A	91.9	A	14.2	A	35.3	A	43.7	A	8.8	A	68.8	A	128.6	A	14.2	A	81	A	gb:NM_080834.1 /DB_XREF=gi:18201889 /TID=Hs2.147150.1 /CNT=16 /FEA=FLmRNA /TIER=FL /STK=2 /LL=140894 /UG_GENE=C20orf152 /UG=Hs.147150 /UG_TITLE=chromosome 20 open reading frame 152 /DEF=Homo sapiens chromosome 20 open reading frame 152 (C20orf152), mRNA. /FL=gb:NM_080834.1
1552687_a_at	60.8	A	26	A	31.1	A	7	A	11.3	A	71.4	A	32.7	A	18.7	A	48.8	A	15.8	A	106.2	P	20.8	A	gb:NM_080834.1 /DB_XREF=gi:18201889 /TID=Hs2.147150.1 /CNT=16 /FEA=FLmRNA /TIER=FL /STK=2 /LL=140894 /UG_GENE=C20orf152 /UG=Hs.147150 /UG_TITLE=chromosome 20 open reading frame 152 /DEF=Homo sapiens chromosome 20 open reading frame 152 (C20orf152), mRNA. /FL=gb:NM_080834.1
1552689_at	54.3	A	63	A	67.1	A	111.9	A	37.6	A	29.5	A	37.4	A	32.2	A	32.4	A	54.9	A	22.4	A	30.7	A	gb:NM_020764.1 /DB_XREF=gi:18079215 /GEN=CASKIN1 /TID=Hs2.334479.1 /CNT=14 /FEA=FLmRNA /TIER=FL /STK=2 /LL=57524 /UG=Hs.334479 /DEF=Homo sapiens cask-interacting protein 1 (CASKIN1), mRNA. /PROD=cask-interacting protein 1 /FL=gb:NM_020764.1 gb:AF451977.1
1552690_a_at	350.6	A	103.6	A	135.8	A	135.2	A	148.3	A	97.7	A	474.9	P	104.1	A	155.8	A	248.8	A	150.5	A	222.6	P	gb:NM_172364.1 /DB_XREF=gi:27312024 /GEN=CACNA2D4 /TID=Hs2.13768.1 /CNT=14 /FEA=FLmRNA /TIER=FL /STK=2 /LL=93589 /UG=Hs.13768 /DEF=Homo sapiens calcium channel, voltage-dependent, alpha 2delta subunit 4 (CACNA2D4), mRNA. /PROD=voltage-gated calcium channel alpha(2)delta-4subunit /FL=gb:AF516695.1 gb:NM_172364.1
1552691_at	3.9	A	34.4	A	21.6	A	1.7	A	5.5	A	5.6	A	13.1	A	18.3	A	8.6	A	28.5	A	0.7	A	1.1	A	gb:NM_138450.2 /DB_XREF=gi:27764878 /TID=Hs2.348334.1 /CNT=14 /FEA=FLmRNA /TIER=FL /STK=2 /LL=115761 /UG_GENE=MGC17429 /UG=Hs.348334 /UG_TITLE=hypothetical protein MGC17429 /DEF=Homo sapiens hypothetical protein MGC17429 (MGC17429), mRNA. /FL=gb:NM_138450.2 gb:BC013150.1
1552693_at	3.7	A	7.4	A	6.2	A	5.9	A	2.8	A	2.5	A	10.6	A	2.8	A	7.5	A	2.2	A	25.4	A	5.1	A	gb:NM_138450.2 /DB_XREF=gi:27764878 /TID=Hs2.348334.1 /CNT=14 /FEA=FLmRNA /TIER=ConsEnd /STK=0 /LL=115761 /UG_GENE=MGC17429 /UG=Hs.348334 /UG_TITLE=hypothetical protein MGC17429 /DEF=Homo sapiens hypothetical protein MGC17429 (MGC17429), mRNA. /FL=gb:NM_138450.2 gb:BC013150.1
1552694_at	52.2	A	52.7	A	66.8	A	1.2	A	26.5	A	82.3	A	57	A	9.9	A	41.8	A	8.9	A	61.4	A	33.2	A	gb:NM_052885.1 /DB_XREF=gi:16418394 /GEN=SLC2A13 /TID=Hs2.117979.1 /CNT=13 /FEA=FLmRNA /TIER=FL /STK=2 /LL=114134 /UG=Hs.117979 /DEF=Homo sapiens solute carrier family 2 (facilitated glucose transporter), member 13 (SLC2A13), mRNA. /PROD=solute carrier family 2 (facilitated glucosetransporter), member 13 /FL=gb:NM_052885.1
1552695_a_at	307.2	P	349.2	P	267.6	P	56.8	A	93.9	A	340.6	P	362.6	P	89.3	A	89.9	A	67.3	A	276	P	91.9	A	gb:NM_052885.1 /DB_XREF=gi:16418394 /GEN=SLC2A13 /TID=Hs2.117979.1 /CNT=13 /FEA=FLmRNA /TIER=FL /STK=2 /LL=114134 /UG=Hs.117979 /DEF=Homo sapiens solute carrier family 2 (facilitated glucose transporter), member 13 (SLC2A13), mRNA. /PROD=solute carrier family 2 (facilitated glucosetransporter), member 13 /FL=gb:NM_052885.1
1552696_at	264.4	P	231.6	P	511.3	P	176.5	P	229	P	205.6	P	278.3	P	109	P	254	P	254.3	P	314.5	P	364	P	gb:NM_144599.1 /DB_XREF=gi:21389396 /TID=Hs2.352617.1 /CNT=12 /FEA=FLmRNA /TIER=FL /STK=2 /LL=123606 /UG_GENE=MGC35570 /UG=Hs.352617 /UG_TITLE=hypothetical protein MGC35570 /DEF=Homo sapiens hypothetical protein MGC35570 (MGC35570), mRNA. /FL=gb:BC025678.1 gb:NM_144599.1
1552698_at	220.7	A	74.2	A	53.2	A	53.2	A	44.5	A	227.4	A	311.1	A	145.5	A	66.9	A	204.6	A	213.7	A	86.1	A	gb:NM_145042.1 /DB_XREF=gi:21450789 /TID=Hs2.339837.1 /CNT=10 /FEA=FLmRNA /TIER=FL /STK=2 /LL=113691 /UG_GENE=MGC16703 /UG=Hs.339837 /UG_TITLE=alpha tubulin-like /DEF=Homo sapiens alpha tubulin-like (MGC16703), mRNA. /FL=gb:BC009991.1 gb:NM_145042.1
1552701_a_at	35.9	A	3.5	A	663	P	132.3	P	1148.6	P	531.8	P	36.1	A	644.8	P	569	P	107	A	897.5	P	17.4	A	gb:NM_052889.1 /DB_XREF=gi:16751832 /GEN=COP /TID=Hs2.348365.1 /CNT=9 /FEA=FLmRNA /TIER=FL /STK=2 /LL=114769 /UG=Hs.348365 /DEF=Homo sapiens CARD only protein (COP), mRNA. /PROD=CARD only protein /FL=gb:AF367017.1 gb:NM_052889.1
1552703_s_at	532	P	367.2	P	866	P	97.7	M	1307.4	P	692.5	P	220.3	P	625.2	P	826	P	98.8	P	857.2	P	70.6	A	gb:NM_052889.1 /DB_XREF=gi:16751832 /GEN=COP /TID=Hs2.348365.1 /CNT=9 /FEA=FLmRNA /TIER=FL /STK=2 /LL=114769 /UG=Hs.348365 /DEF=Homo sapiens CARD only protein (COP), mRNA. /PROD=CARD only protein /FL=gb:AF367017.1 gb:NM_052889.1
1552705_at	78	P	58.2	P	107.8	P	36.9	P	64.7	P	65	P	82.9	P	56	M	66.5	P	86	P	111.4	P	65.9	P	gb:BC035000.1 /DB_XREF=gi:23273914 /TID=Hs2.132237.1 /CNT=20 /FEA=FLmRNA /TIER=FL /STK=2 /LL=142679 /UG_GENE=DUSP19 /UG=Hs.132237 /DEF=Homo sapiens, protein phosphatase, clone MGC:33229 IMAGE:5269106, mRNA, complete cds. /PROD=protein phosphatase /FL=gb:BC035000.1 gb:AB063186.1 gb:AB038770.1 gb:NM_080876.1
1552708_a_at	89.3	A	142.2	A	126.4	P	22.3	A	16.2	A	75.5	P	112	A	9.4	A	61.1	A	87.6	A	102.8	A	50.4	A	gb:AB038770.1 /DB_XREF=gi:18146955 /TID=Hs2.132237.1 /CNT=20 /FEA=FLmRNA /TIER=FL /STK=1 /LL=142679 /UG_GENE=DUSP19 /UG=Hs.132237 /DEF=Homo sapiens mRNA for protein phosphatase, complete cds. /PROD=protein phosphatase /FL=gb:BC035000.1 gb:AB063186.1 gb:AB038770.1 gb:NM_080876.1
1552711_a_at	247.2	A	325.6	P	100	A	556.9	P	355.3	P	433.9	P	234.6	A	204.2	P	302	P	256.9	P	198.9	M	244.3	P	gb:NM_144607.1 /DB_XREF=gi:21389412 /TID=Hs2.27475.1 /CNT=17 /FEA=FLmRNA /TIER=FL /STK=2 /LL=124637 /UG_GENE=FLJ32499 /UG=Hs.27475 /UG_TITLE=hypothetical protein FLJ32499 /DEF=Homo sapiens hypothetical protein FLJ32499 (FLJ32499), mRNA. /FL=gb:NM_144607.1
1552712_a_at	119.9	A	121.4	A	399	P	194.2	P	321.5	P	1147.3	P	343.9	A	52.8	A	146.1	A	105.5	A	102.4	A	418.7	P	gb:NM_170706.1 /DB_XREF=gi:25141324 /GEN=C1orf15 /TID=Hs2.158244.2 /CNT=16 /FEA=FLmRNA /TIER=FL /STK=2 /LL=23057 /UG=Hs.158244 /DEF=Homo sapiens chromosome 1 open reading frame 15 (C1orf15), transcript variant 2, mRNA. /PROD=nicotinamide mononucleotide adenylyltransferase2 isoform 2 /FL=gb:BC020998.1 gb:NM_170706.1
1552713_a_at	146.1	A	396.1	A	71	A	85.5	A	174.2	A	151.7	M	264.5	A	80.8	A	357.5	A	240	P	379.5	A	103.9	A	gb:NM_000342.1 /DB_XREF=gi:4507020 /GEN=SLC4A1 /TID=Hs2.185923.1 /CNT=14 /FEA=FLmRNA /TIER=FL /STK=2 /LL=6521 /UG=Hs.185923 /DEF=Homo sapiens solute carrier family 4, anion exchanger, member 1 (erythrocyte membrane protein band 3, Diego blood group) (SLC4A1), mRNA. /PROD=solute carrier family 4, anion exchanger, member1 (erythrocyte membrane protein band 3, Diego bloodgroup) /FL=gb:M27819.1 gb:NM…
1552714_at	11	A	13.6	A	9.6	A	56.3	A	12.7	A	9.3	A	24.5	A	43.5	A	34.7	A	26.1	A	12.1	A	12	A	gb:NM_153836.1 /DB_XREF=gi:24475868 /GEN=CREG2 /TID=Hs2.232823.1 /CNT=13 /FEA=FLmRNA /TIER=FL /STK=2 /LL=200407 /UG=Hs.232823 /DEF=Homo sapiens cellular repressor of E1A-stimulated genes 2 (CREG2), mRNA. /PROD=cellular repressor of E1A-stimulated genes 2 /FL=gb:AB046109.1 gb:NM_153836.1
1552715_a_at	60.3	A	46.1	A	6	A	4.5	A	62.9	A	68.3	A	15.7	A	36.8	A	13.9	A	68.4	A	39.1	A	63.2	A	gb:NM_021634.1 /DB_XREF=gi:11056007 /GEN=LGR7 /TID=Hs2.209446.1 /CNT=10 /FEA=FLmRNA /TIER=FL /STK=2 /LL=59350 /UG=Hs.209446 /DEF=Homo sapiens leucine-rich repeat-containing G protein-coupled receptor 7 (LGR7), mRNA. /PROD=leucine-rich repeat-containing G protein-coupledreceptor 7 /FL=gb:AF190500.1 gb:NM_021634.1
1552716_at	31.6	A	7.6	A	203	P	143.5	P	93.7	P	360.8	P	128.9	A	39.4	A	11.2	A	36.2	A	124.9	P	1.7	A	gb:NM_144722.1 /DB_XREF=gi:21389508 /TID=Hs2.137422.1 /CNT=10 /FEA=FLmRNA /TIER=FL /STK=2 /LL=153268 /UG_GENE=FLJ25395 /UG=Hs.137422 /UG_TITLE=hypothetical protein FLJ25395 /DEF=Homo sapiens hypothetical protein FLJ25395 (FLJ25395), mRNA. /FL=gb:NM_144722.1
1552717_s_at	475.4	A	620.5	A	778.9	P	902.2	P	756.1	P	881.3	P	1549.6	P	838.8	P	770.4	P	1076.9	P	1364.9	P	486.6	M	gb:NM_153243.1 /DB_XREF=gi:24158471 /TID=Hs2.356636.1 /CNT=10 /FEA=FLmRNA /TIER=FL /STK=2 /LL=220766 /UG_GENE=MGC26143 /UG=Hs.356636 /UG_TITLE=hypothetical protein MGC26143 /DEF=Homo sapiens hypothetical protein MGC26143 (MGC26143), mRNA. /FL=gb:BC014590.1 gb:NM_153243.1
1552718_at	368.3	P	281.3	A	449.7	P	101	A	86.6	A	90.9	A	247.6	A	207.1	A	23.2	A	110.6	A	215.5	A	93.9	A	gb:NM_080820.2 /DB_XREF=gi:21361784 /GEN=HARS2 /TID=Hs2.352419.1 /CNT=9 /FEA=FLmRNA /TIER=FL /STK=2 /LL=92675 /UG=Hs.352419 /DEF=Homo sapiens histidyl-tRNA synthetase 2 (HARS2), mRNA. /PROD=histidyl-tRNA synthetase 2 /FL=gb:NM_080820.2
1552719_at	32.2	A	19.3	A	9.8	A	7.7	A	99.8	A	17.2	A	33.5	A	17.7	A	14.1	A	51.2	A	23	A	11.5	A	gb:NM_138423.1 /DB_XREF=gi:19923946 /TID=Hs2.323966.1 /CNT=9 /FEA=FLmRNA /TIER=FL /STK=2 /LL=113201 /UG_GENE=LOC113201 /UG=Hs.323966 /UG_TITLE=hypothetical protein BC012124 /DEF=Homo sapiens hypothetical protein BC012124 (LOC113201), mRNA. /FL=gb:BC012124.1 gb:NM_138423.1
1552721_a_at	50.3	A	11.6	A	51	A	84.3	A	70	A	64.5	A	13.6	A	36.2	A	105	A	8.5	A	161.2	A	35.8	A	gb:NM_033136.1 /DB_XREF=gi:15055540 /GEN=FGF1 /TID=Hs2.75297.2 /CNT=8 /FEA=FLmRNA /TIER=FL /STK=2 /LL=2246 /UG=Hs.75297 /DEF=Homo sapiens fibroblast growth factor 1 (acidic) (FGF1), transcript variant 2, mRNA. /PROD=fibroblast growth factor 1 (acidic) isoform 2precursor /FL=gb:NM_033137.1 gb:NM_033136.1
1552722_at	37.4	A	10.9	A	5.2	A	16.9	A	36.2	A	43.1	A	73	A	3.9	A	59.9	P	63.3	P	59.2	P	44.6	M	gb:NM_016300.2 /DB_XREF=gi:20127547 /GEN=ARPP-21 /TID=Hs2.351088.1 /CNT=8 /FEA=FLmRNA /TIER=FL /STK=2 /LL=10777 /UG=Hs.351088 /DEF=Homo sapiens cyclic AMP-regulated phosphoprotein, 21 kD (ARPP-21), mRNA. /PROD=cyclic AMP-regulated phosphoprotein, 21 kD /FL=gb:NM_016300.2 gb:BC017805.1
1552724_at	163.5	P	124.4	P	231.9	P	106.2	P	134.2	A	121.6	A	484.9	A	45.5	A	298.3	P	263	P	150.6	P	162	P	gb:AY099086.1 /DB_XREF=gi:20563000 /TID=Hs2.196956.1 /CNT=8 /FEA=FLmRNA /TIER=FL /STK=2 /LL=158800 /UG_GENE=OTEX /UG=Hs.196956 /DEF=Homo sapiens paired-like homeobox protein OTEX mRNA, complete cds. /PROD=paired-like homeobox protein OTEX /FL=gb:NM_139282.1 gb:AY099086.1
1552725_s_at	197.9	A	146.5	A	116.1	A	66.9	A	140.6	A	159.9	A	154.2	A	28.4	A	93.2	A	84.9	A	109.5	A	115.3	A	gb:NM_139057.1 /DB_XREF=gi:21265063 /GEN=ADAMTS17 /TID=Hs2.349970.1 /CNT=17 /FEA=FLmRNA /TIER=FL /STK=2 /LL=170691 /UG=Hs.349970 /DEF=Homo sapiens a disintegrin-like and metalloprotease (reprolysin type) with thrombospondin type 1 motif, 17 (ADAMTS17), mRNA. /PROD=a disintegrin-like and metalloprotease(reprolysin type) with thrombospondin type 1 motif, 17preproprotein /FL=gb:NM_139057.1
1552726_at	25.4	A	79.2	A	140.8	A	13.4	A	17.2	A	161.7	A	64.7	A	60.5	A	48.8	A	57	A	60.4	A	33.4	A	gb:AA022668 /DB_XREF=gi:1486749 /DB_XREF=ze71e08.s1 /CLONE=IMAGE:364454 /TID=Hs2.349970.1 /CNT=17 /FEA=FLmRNA /TIER=ConsEnd /STK=2 /LL=170691 /UG_GENE=ADAMTS17 /UG=Hs.349970 /UG_TITLE=a disintegrin-like and metalloprotease (reprolysin type) with thrombospondin type 1 motif, 17 /FL=gb:NM_139057.1
1552727_s_at	40.1	A	13.8	A	214.9	P	73.7	P	69.2	P	436.1	P	303.2	P	40.9	A	121.5	A	181.8	P	255.1	P	76.6	P	gb:AA022668 /DB_XREF=gi:1486749 /DB_XREF=ze71e08.s1 /CLONE=IMAGE:364454 /TID=Hs2.349970.1 /CNT=17 /FEA=FLmRNA /TIER=ConsEnd /STK=2 /LL=170691 /UG_GENE=ADAMTS17 /UG=Hs.349970 /UG_TITLE=a disintegrin-like and metalloprotease (reprolysin type) with thrombospondin type 1 motif, 17 /FL=gb:NM_139057.1
1552729_at	215.9	A	170.9	A	59.8	A	189.3	A	45.5	A	88	A	28.1	A	367.6	A	286.4	A	225.5	A	79	A	134.1	A	gb:NM_032887.1 /DB_XREF=gi:14249643 /TID=Hs2.334521.1 /CNT=15 /FEA=FLmRNA /TIER=FL /STK=2 /LL=84973 /UG_GENE=MGC16037 /UG=Hs.334521 /UG_TITLE=hypothetical protein MGC16037 /DEF=Homo sapiens hypothetical protein MGC16037 (MGC16037), mRNA. /FL=gb:NM_032887.1 gb:BC007651.1
1552730_at	55.8	A	46	A	42.7	A	47.9	A	20	A	116.1	A	20.9	A	20.5	A	27.4	A	38.9	A	77.4	A	27	A	gb:NM_021044.2 /DB_XREF=gi:23346635 /GEN=DHH /TID=Hs2.352607.1 /CNT=13 /FEA=FLmRNA /TIER=FL /STK=2 /LL=50846 /UG=Hs.352607 /DEF=Homo sapiens desert hedgehog homolog (Drosophila) (DHH), mRNA. /PROD=desert hedgehog preproprotein /FL=gb:BC033507.1 gb:NM_021044.2
1552731_at	7.7	A	8.4	A	4	A	7.3	A	10.3	A	16.8	A	29	A	3.8	A	11.1	A	4.9	A	16.6	A	37.7	A	gb:NM_139166.1 /DB_XREF=gi:21040250 /GEN=STARS /TID=Hs2.374668.1 /CNT=12 /FEA=FLmRNA /TIER=FL /STK=2 /LL=137735 /UG=Hs.374668 /DEF=Homo sapiens striated muscle activator of Rho-dependent signaling (STARS), mRNA. /PROD=striated muscle activator of Rho-dependentsignaling /FL=gb:AF503617.1 gb:NM_139166.1
1552732_at	27.8	A	40.1	P	36.6	A	21.2	A	44.8	A	58.3	A	124.2	A	27.7	A	36.3	A	48.6	A	36.1	A	57	P	gb:AL832152.1 /DB_XREF=gi:21732696 /TID=Hs2.374668.1 /CNT=12 /FEA=FLmRNA /TIER=ConsEnd /STK=0 /LL=137735 /UG_GENE=STARS /UG=Hs.374668 /UG_TITLE=striated muscle activator of Rho-dependent signaling /DEF=Homo sapiens mRNA; cDNA DKFZp686C0314 (from clone DKFZp686C0314). /FL=gb:AF503617.1 gb:NM_139166.1
1552733_at	174.5	P	100.1	A	211.5	P	196.8	P	137.3	P	66.6	A	310.8	P	68.2	P	119.3	P	119.2	P	82.6	P	95.8	P	gb:NM_172193.1 /DB_XREF=gi:26190615 /TID=Hs2.335887.1 /CNT=12 /FEA=FLmRNA /TIER=FL /STK=2 /LL=122773 /UG_GENE=KLHDC1 /UG=Hs.335887 /UG_TITLE=kelch domain containing 1 /DEF=Homo sapiens kelch domain containing 1 (KLHDC1), mRNA. /FL=gb:AF111806.1 gb:NM_172193.1
1552734_at	4.5	A	44.5	A	58	P	37.1	M	2.9	A	46.7	A	125.6	P	48.5	P	33.6	A	66.6	A	38	A	10.4	A	gb:NM_152756.1 /DB_XREF=gi:22749480 /TID=Hs2.222006.1 /CNT=10 /FEA=FLmRNA /TIER=FL /STK=2 /LL=253260 /UG_GENE=MGC39830 /UG=Hs.222006 /UG_TITLE=hypothetical protein MGC39830 /DEF=Homo sapiens hypothetical protein MGC39830 (MGC39830), mRNA. /FL=gb:BC029608.1 gb:NM_152756.1
1552735_at	59	A	14.8	A	85.4	P	5.5	A	85.9	P	114	P	158.1	P	24.4	M	58.6	A	66.6	P	34	A	38.9	M	gb:AL832028.1 /DB_XREF=gi:21732568 /TID=Hs2.210349.1 /CNT=9 /FEA=FLmRNA /TIER=ConsEnd /STK=0 /LL=56111 /UG_GENE=PCDHGA4 /UG=Hs.210349 /UG_TITLE=protocadherin gamma subfamily A, 4 /DEF=Homo sapiens mRNA; cDNA DKFZp451N244 (from clone DKFZp451N244). /FL=gb:AF152511.1 gb:NM_032053.1
1552736_a_at	20.3	A	49.7	A	4.1	A	4.7	A	65.2	A	12.5	A	292.3	P	5.4	A	68.5	A	10.6	A	16.2	A	11.9	A	gb:NM_138966.2 /DB_XREF=gi:23510394 /GEN=NETO1 /TID=Hs2.60563.1 /CNT=9 /FEA=FLmRNA /TIER=FL /STK=2 /LL=81832 /UG=Hs.60563 /DEF=Homo sapiens neuropilin (NRP) and tolloid (TLL)-like 1 (NETO1), transcript variant 3, mRNA. /PROD=neuropilin- and tolloid-like protein 1 isoform 3precursor /FL=gb:AF448838.1 gb:NM_138966.2
1552737_s_at	278.7	P	256.1	P	140.3	P	120.2	P	203.4	A	223	P	311	A	317.1	P	447.4	P	231.9	P	196.4	P	444.5	P	gb:NM_007014.2 /DB_XREF=gi:8400741 /GEN=WWP2 /TID=Hs2.333382.1 /CNT=8 /FEA=FLmRNA /TIER=FL /STK=2 /LL=11060 /UG=Hs.333382 /DEF=Homo sapiens Nedd-4-like ubiquitin-protein ligase (WWP2), mRNA. /PROD=Nedd-4-like ubiquitin-protein ligase /FL=gb:U96114.1 gb:NM_007014.2
1552738_a_at	153	P	135.3	P	96.2	P	80.5	P	163.7	P	108.2	A	227.1	A	62.9	A	61.5	P	65.8	A	67.6	A	174.1	P	gb:NM_138729.1 /DB_XREF=gi:21264622 /GEN=ST7L /TID=Hs2.293483.2 /CNT=8 /FEA=FLmRNA /TIER=FL /STK=2 /LL=54879 /UG=Hs.293483 /DEF=Homo sapiens suppression of tumorigenicity 7 like (ST7L), transcript variant 4, mRNA. /PROD=suppression of tumorigenicity 7-like isoform 4 /FL=gb:AB081320.1 gb:NM_138729.1
1552739_s_at	328.7	P	381.2	P	539.1	P	276.8	P	586.3	P	411	P	148.1	A	166.1	P	362.8	P	183.7	P	336.2	P	278.8	P	gb:NM_138729.1 /DB_XREF=gi:21264622 /GEN=ST7L /TID=Hs2.293483.2 /CNT=8 /FEA=FLmRNA /TIER=FL /STK=2 /LL=54879 /UG=Hs.293483 /DEF=Homo sapiens suppression of tumorigenicity 7 like (ST7L), transcript variant 4, mRNA. /PROD=suppression of tumorigenicity 7-like isoform 4 /FL=gb:AB081320.1 gb:NM_138729.1
1552740_at	6.2	A	7.1	A	4.1	A	7.3	A	11.2	A	7.8	A	24.8	A	6.5	A	6.2	A	2.9	A	9.3	A	3.3	A	gb:NM_144706.1 /DB_XREF=gi:21389620 /TID=Hs2.352211.1 /CNT=8 /FEA=FLmRNA /TIER=FL /STK=2 /LL=150590 /UG_GENE=MGC29762 /UG=Hs.352211 /UG_TITLE=hypothetical protein MGC29762 /DEF=Homo sapiens hypothetical protein MGC29762 (MGC29762), mRNA. /FL=gb:NM_144706.1 gb:BC021264.1
1552742_at	22.2	A	85.1	A	135.5	P	30.7	A	46.2	A	74.5	A	51.2	A	59.1	A	10.1	A	91.8	A	86.4	A	117.6	A	gb:NM_144633.2 /DB_XREF=gi:27886666 /GEN=KCNH8 /TID=Hs2.144549.1 /CNT=7 /FEA=FLmRNA /TIER=FL /STK=2 /LL=131096 /UG=Hs.144549 /DEF=Homo sapiens potassium voltage-gated channel, subfamily H (eag-related), member 8 (KCNH8), mRNA. /PROD=potassium voltage-gated channel, subfamily H,member 8 /FL=gb:AY053503.1 gb:NM_144633.2
1552743_at	121.3	A	214.7	A	148.8	A	9.9	A	30.3	A	140.6	A	219.4	A	79.7	A	62.7	A	35	A	18.7	A	21.1	A	gb:NM_024979.2 /DB_XREF=gi:27777654 /GEN=MCF2L /TID=Hs2.25515.1 /CNT=7 /FEA=FLmRNA /TIER=FL /STK=2 /LL=23263 /UG=Hs.25515 /DEF=Homo sapiens MCF.2 cell line derived transforming sequence-like (MCF2L), mRNA. /PROD=MCF.2 cell line derived transformingsequence-like /FL=gb:BC020208.1 gb:NM_024979.2
1552745_at	33	A	9.4	A	99.4	A	4.5	A	8.8	A	49.7	A	121.2	A	35.6	A	102.3	A	54.8	A	16.4	A	78.6	A	gb:NM_173488.1 /DB_XREF=gi:27735082 /TID=Hs2.388874.1 /CNT=7 /FEA=FLmRNA /TIER=FL /STK=2 /LL=133482 /UG_GENE=MGC26949 /UG=Hs.388874 /UG_TITLE=hypothetical protein MGC26949 /DEF=Homo sapiens hypothetical protein MGC26949 (MGC26949), mRNA. /FL=gb:NM_173488.1 gb:BC034976.1
1552747_a_at	41.5	A	52.8	P	48.8	A	30.8	M	24.8	A	46	A	154	P	57.9	P	52.4	A	32.1	A	29.3	A	45.8	P	gb:NM_144714.1 /DB_XREF=gi:21389492 /TID=Hs2.122800.1 /CNT=7 /FEA=FLmRNA /TIER=FL /STK=2 /LL=151649 /UG_GENE=FLJ25449 /UG=Hs.122800 /UG_TITLE=hypothetical protein MGC27069 /DEF=Homo sapiens hypothetical protein MGC27069 (FLJ25449), mRNA. /FL=gb:NM_144714.1 gb:BC021717.1
1552749_a_at	89.1	A	225	A	55.6	A	99	A	41.2	A	59.3	A	122.9	A	42.6	A	44.5	A	97.7	A	75.2	A	60	A	gb:NM_145275.1 /DB_XREF=gi:21687234 /TID=Hs2.298079.1 /CNT=7 /FEA=FLmRNA /TIER=FL /STK=2 /LL=147700 /UG_GENE=LOC147700 /UG=Hs.298079 /UG_TITLE=similar to kinesin light chain KLCt /DEF=Homo sapiens similar to kinesin light chain KLCt (LOC147700), mRNA. /FL=gb:BC025318.1 gb:NM_145275.1
1552750_at	40.9	A	19.5	A	8.4	A	49.9	A	17.6	A	48.5	A	43.9	A	9.1	A	10.9	A	8.7	A	20.1	A	21.9	A	gb:NM_054113.1 /DB_XREF=gi:16930816 /GEN=KIP3 /TID=Hs2.255432.1 /CNT=7 /FEA=FLmRNA /TIER=FL /STK=2 /LL=117286 /UG=Hs.255432 /DEF=Homo sapiens DNA-dependent protein kinase catalytic subunit-interacting protein 3 (KIP3), mRNA. /PROD=DNA-dependent protein kinase catalyticsubunit-interacting protein 3 /FL=gb:AB050868.1 gb:NM_054113.1
1552751_a_at	234.1	A	374.3	P	126.4	A	47.7	A	140.3	P	179.7	A	197.9	A	143.4	A	276.2	A	239.9	A	156.8	A	142.6	A	gb:NM_054113.1 /DB_XREF=gi:16930816 /GEN=KIP3 /TID=Hs2.255432.1 /CNT=7 /FEA=FLmRNA /TIER=FL /STK=2 /LL=117286 /UG=Hs.255432 /DEF=Homo sapiens DNA-dependent protein kinase catalytic subunit-interacting protein 3 (KIP3), mRNA. /PROD=DNA-dependent protein kinase catalyticsubunit-interacting protein 3 /FL=gb:AB050868.1 gb:NM_054113.1
1552752_a_at	91	A	118.4	P	73.3	P	62.5	A	61.7	P	80.9	P	111.6	A	56.4	P	185.8	P	84.7	P	73.6	A	89.9	P	gb:NM_153184.1 /DB_XREF=gi:23346423 /TID=Hs2.48507.1 /CNT=15 /FEA=FLmRNA /TIER=FL /STK=2 /LL=253559 /UG_GENE=LOC253559 /UG=Hs.48507 /UG_TITLE=nectin-like protein 3 /DEF=Homo sapiens nectin-like protein 3 (LOC253559), mRNA. /FL=gb:NM_153184.1
1552754_a_at	1.7	A	30.8	A	3.9	A	1.7	A	17.7	A	31.6	A	17.1	A	1.9	A	12.1	A	2.6	A	8.7	A	2.6	A	gb:AA640422 /DB_XREF=gi:2565672 /DB_XREF=nt99g05.s1 /CLONE=IMAGE:1206680 /TID=Hs2.48507.1 /CNT=15 /FEA=FLmRNA /TIER=ConsEnd /STK=0 /LL=253559 /UG_GENE=LOC253559 /UG=Hs.48507 /UG_TITLE=nectin-like protein 3 /FL=gb:NM_153184.1
1552755_at	23.6	A	16.8	A	32.9	A	13.7	A	16.3	A	13.7	A	40.9	A	50.1	A	15	A	10.4	A	10.9	A	14.9	A	gb:NM_152569.1 /DB_XREF=gi:22749172 /TID=Hs2.190877.1 /CNT=12 /FEA=FLmRNA /TIER=FL /STK=2 /LL=157983 /UG_GENE=FLJ31158 /UG=Hs.190877 /UG_TITLE=hypothetical protein FLJ31158 /DEF=Homo sapiens hypothetical protein FLJ31158 (FLJ31158), mRNA. /FL=gb:NM_152569.1
1552757_s_at	14.4	A	115.3	A	9.9	A	34.5	A	8.4	A	10.8	A	65.4	A	74.1	A	64.6	A	54.7	A	13.6	A	6.5	A	gb:AI478419 /DB_XREF=gi:4371645 /DB_XREF=ti71h05.x1 /CLONE=IMAGE:2137497 /TID=Hs2.190877.1 /CNT=12 /FEA=FLmRNA /TIER=ConsEnd /STK=2 /LL=157983 /UG_GENE=FLJ31158 /UG=Hs.190877 /UG_TITLE=hypothetical protein FLJ31158 /FL=gb:NM_152569.1
1552758_at	55.1	A	16.2	A	47.7	A	59.9	A	19.5	A	30.8	A	77.7	A	57.7	A	169.8	A	85.5	A	69.3	A	70.9	A	gb:NM_058176.1 /DB_XREF=gi:17158038 /GEN=HDAC9 /TID=Hs2.116753.2 /CNT=11 /FEA=FLmRNA /TIER=FL /STK=2 /LL=9734 /UG=Hs.116753 /DEF=Homo sapiens histone deacetylase 9 (HDAC9), transcript variant 1, mRNA. /PROD=histone deacetylase 9 isoform 1 /FL=gb:NM_058177.1 gb:AY032737.1 gb:AY032738.1 gb:NM_058176.1
1552760_at	4.1	A	6.2	A	2.3	A	1.9	A	8.3	A	25.1	A	32.3	A	5.9	A	11.8	A	4.3	A	3.7	A	2.5	A	gb:BM726008 /DB_XREF=gi:19047341 /DB_XREF=UI-E-EJ0-aih-n-06-0-UI.r1 /CLONE=UI-E-EJ0-aih-n-06-0-UI /TID=Hs2.116753.2 /CNT=11 /FEA=FLmRNA /TIER=ConsEnd /STK=0 /LL=9734 /UG_GENE=HDAC9 /UG=Hs.116753 /UG_TITLE=histone deacetylase 9 /FL=gb:NM_058177.1 gb:AY032737.1 gb:AY032738.1 gb:NM_058176.1
1552761_at	166.5	A	153	A	135.6	A	55.4	A	17.8	A	28.7	A	289.5	A	70	A	326.4	A	191.7	A	117.1	A	100.8	A	gb:NM_153357.1 /DB_XREF=gi:23503292 /TID=Hs2.371334.1 /CNT=11 /FEA=FLmRNA /TIER=FL /STK=2 /LL=162515 /UG_GENE=FLJ90193 /UG=Hs.371334 /UG_TITLE=hypothetical protein FLJ90193 /DEF=Homo sapiens hypothetical protein FLJ90193 (FLJ90193), mRNA. /FL=gb:NM_153357.1
1552763_at	33.1	A	15.5	A	42.4	A	1.4	A	2.6	A	23.4	A	74	A	22.8	A	8.1	A	16.8	A	14	A	31.3	A	gb:NM_153704.1 /DB_XREF=gi:24308461 /TID=Hs2.130554.1 /CNT=9 /FEA=FLmRNA /TIER=FL /STK=2 /LL=91147 /UG_GENE=MGC26979 /UG=Hs.130554 /UG_TITLE=hypothetical protein MGC26979 /DEF=Homo sapiens hypothetical protein MGC26979 (MGC26979), mRNA. /FL=gb:BC032835.1 gb:NM_153704.1
1552765_x_at	4.9	A	62.8	A	121.4	P	68.4	P	69.4	A	54.9	A	87.9	A	38.6	A	123	A	99.7	A	54.9	A	9.1	A	gb:NM_153704.1 /DB_XREF=gi:24308461 /TID=Hs2.130554.1 /CNT=9 /FEA=FLmRNA /TIER=FL /STK=2 /LL=91147 /UG_GENE=MGC26979 /UG=Hs.130554 /UG_TITLE=hypothetical protein MGC26979 /DEF=Homo sapiens hypothetical protein MGC26979 (MGC26979), mRNA. /FL=gb:BC032835.1 gb:NM_153704.1
1552766_at	46.4	P	3.5	A	63.2	P	22.9	A	508.6	P	399.4	P	116.2	A	7.1	A	25.4	A	89.4	P	4.5	A	86.4	P	gb:NM_147174.2 /DB_XREF=gi:27597081 /GEN=HS6ST2 /TID=Hs2.82302.2 /CNT=9 /FEA=FLmRNA /TIER=FL /STK=2 /LL=90161 /UG=Hs.82302 /DEF=Homo sapiens heparan sulfate 6-O-sulfotransferase 2 (HS6ST2), mRNA. /PROD=heparan sulfate 6-O-sulfotransferase 2 /FL=gb:NM_147174.2
1552767_a_at	78.1	A	114.6	A	335.1	P	1	A	2200.6	P	2100.4	P	617.7	P	18	A	85.1	A	168.7	P	6.8	A	349.4	P	gb:NM_147174.2 /DB_XREF=gi:27597081 /GEN=HS6ST2 /TID=Hs2.82302.2 /CNT=9 /FEA=FLmRNA /TIER=FL /STK=2 /LL=90161 /UG=Hs.82302 /DEF=Homo sapiens heparan sulfate 6-O-sulfotransferase 2 (HS6ST2), mRNA. /PROD=heparan sulfate 6-O-sulfotransferase 2 /FL=gb:NM_147174.2
1552768_at	25	A	8.2	A	7.2	A	6.2	A	19.8	A	26.5	A	74.3	A	12.9	A	29	A	6.4	A	19.7	A	13.1	A	gb:NM_172207.1 /DB_XREF=gi:27437012 /GEN=CAMKK1 /TID=Hs2.8417.2 /CNT=9 /FEA=FLmRNA /TIER=FL /STK=2 /LL=84254 /UG=Hs.8417 /DEF=Homo sapiens calciumcalmodulin-dependent protein kinase kinase 1, alpha (CAMKK1), transcript variant 3, mRNA. /PROD=calciumcalmodulin-dependent protein kinase 1alpha isoform b /FL=gb:BC031647.1 gb:NM_172207.1
1552769_at	158.6	A	144.8	P	76.2	A	52.4	A	112.4	M	167.8	A	43.1	A	87.3	A	65.4	A	191.8	P	114.4	P	140.6	P	gb:NM_145233.1 /DB_XREF=gi:21687160 /TID=Hs2.334541.1 /CNT=8 /FEA=FLmRNA /TIER=FL /STK=2 /LL=90589 /UG_GENE=LOC90589 /UG=Hs.334541 /UG_TITLE=similar to Zinc finger protein 20 (Zinc finger protein KOX13) (DKFZp572P0920) /DEF=Homo sapiens similar to Zinc finger protein 20 (Zinc finger protein KOX13) (DKFZp572P0920) (LOC90589), mRNA. /FL=gb:BC007868.1 gb:NM_145233.1
1552770_s_at	123.4	A	88.1	A	56.5	A	28.1	A	49.2	A	76.9	A	51	A	68.1	P	158.6	M	66.6	A	77.9	A	96.2	P	gb:NM_145276.1 /DB_XREF=gi:21687236 /TID=Hs2.345226.1 /CNT=7 /FEA=FLmRNA /TIER=FL /STK=2 /LL=147837 /UG_GENE=LOC147837 /UG=Hs.345226 /UG_TITLE=similar to Kruppel-type zinc finger (C2H2) /DEF=Homo sapiens similar to Kruppel-type zinc finger (C2H2) (LOC147837), mRNA. /FL=gb:BC022523.1 gb:NM_145276.1
1552771_a_at	7.7	A	7.5	A	5.3	A	7.4	A	5.8	A	5	A	20.5	A	3	A	4.4	A	7.5	A	4.7	A	2.5	A	gb:NM_173083.1 /DB_XREF=gi:27436858 /TID=Hs2.410158.1 /CNT=7 /FEA=FLmRNA /TIER=FL /STK=2 /LL=286826 /UG_GENE=TGS /UG=Hs.410158 /UG_TITLE=TUDOR gene similar /DEF=Homo sapiens TUDOR gene similar (TGS), mRNA. /FL=gb:AY166859.1 gb:NM_173083.1
1552772_at	53.5	A	27	A	21.8	A	12.4	A	8.3	A	55.5	A	177	A	10.1	A	99.3	A	6.6	A	57.4	A	66.1	A	gb:NM_080387.2 /DB_XREF=gi:24475770 /GEN=CLEC-6 /TID=Hs2.351811.1 /CNT=7 /FEA=FLmRNA /TIER=FL /STK=2 /LL=121481 /UG=Hs.351811 /DEF=Homo sapiens C-type lectin-like receptor (CLEC-6), mRNA. /PROD=C-type lectin-like receptor /FL=gb:BC032313.1 gb:AF411850.1 gb:NM_080387.2
1552773_at	86	A	129.8	P	43	P	90.3	P	101.5	A	107.4	P	166.1	P	68.1	P	128.6	A	158.7	P	104.8	A	85.5	P	gb:BC032313.1 /DB_XREF=gi:21595254 /TID=Hs2.351811.1 /CNT=7 /FEA=FLmRNA /TIER=FL /STK=1 /LL=121481 /UG_GENE=CLEC-6 /UG=Hs.351811 /DEF=Homo sapiens, C-type lectin-like receptor, clone MGC:40078 IMAGE:5218660, mRNA, complete cds. /PROD=C-type lectin-like receptor /FL=gb:BC032313.1 gb:AF411850.1 gb:NM_080387.2
1552774_a_at	91.8	A	39.8	A	202.8	A	145.1	A	122.8	A	58.7	A	86.8	A	172.1	A	20	A	104.6	A	100.9	A	26.5	A	gb:NM_004277.1 /DB_XREF=gi:4759285 /GEN=UCP4 /TID=Hs2.40510.1 /CNT=7 /FEA=FLmRNA /TIER=FL /STK=2 /LL=9481 /UG=Hs.40510 /DEF=Homo sapiens uncoupling protein 4 (UCP4), nuclear gene encoding mitochondrial protein, mRNA. /PROD=uncoupling protein 4 /FL=gb:NM_004277.1 gb:AF110532.1
1552775_at	97.7	A	52	A	68.5	A	54.5	A	55.8	A	17.7	A	37.6	A	154.8	A	32.9	A	27.6	A	17.4	A	150.1	A	gb:NM_148963.1 /DB_XREF=gi:22507379 /GEN=GPRC6A /TID=Hs2.266745.1 /CNT=6 /FEA=FLmRNA /TIER=FL /STK=2 /LL=222545 /UG=Hs.266745 /DEF=Homo sapiens G protein-coupled receptor, family C, group 6, member A (GPRC6A), mRNA. /PROD=G protein-coupled receptor, family C, group 6,member A /FL=gb:AF502962.1 gb:NM_148963.1
1552777_a_at	90.6	A	83.4	A	11.1	A	252.8	P	85	A	9.2	A	125	A	37.4	A	9	A	38.4	A	50.5	A	13.4	A	gb:NM_139165.1 /DB_XREF=gi:21040248 /TID=Hs2.348616.1 /CNT=6 /FEA=FLmRNA /TIER=FL /STK=2 /LL=135250 /UG_GENE=LETAL /UG=Hs.348616 /UG_TITLE=lymphocyte effector toxicity activation ligand /DEF=Homo sapiens lymphocyte effector toxicity activation ligand (LETAL), mRNA. /FL=gb:NM_139165.1 gb:AY069961.1
1552779_a_at	14.7	A	8.8	A	77.8	A	58.2	A	14.3	A	103.8	P	102.4	A	5.7	A	82.5	A	98.7	A	96.4	A	12.2	A	gb:NM_152697.1 /DB_XREF=gi:22749390 /TID=Hs2.367960.1 /CNT=14 /FEA=FLmRNA /TIER=FL /STK=2 /LL=204962 /UG_GENE=MGC34032 /UG=Hs.367960 /UG_TITLE=hypothetical protein MGC34032 /DEF=Homo sapiens hypothetical protein MGC34032 (MGC34032), mRNA. /FL=gb:BC028743.1 gb:NM_152697.1
1552782_at	45.6	A	49.1	A	36.9	A	3.4	A	76	A	43.8	A	142.3	A	3.8	A	11.8	A	49.3	A	39.6	A	28.8	A	gb:AK091400.1 /DB_XREF=gi:21749761 /TID=Hs2.367960.1 /CNT=14 /FEA=FLmRNA /TIER=ConsEnd /STK=0 /LL=204962 /UG_GENE=MGC34032 /UG=Hs.367960 /UG_TITLE=hypothetical protein MGC34032 /DEF=Homo sapiens cDNA FLJ34081 fis, clone FCBBF3004261, moderately similar to Homo sapiens CTL2 gene. /FL=gb:BC028743.1 gb:NM_152697.1
1552783_at	11.7	A	8.7	A	25.4	A	1.4	A	7.8	A	90.9	A	38.1	A	15.4	A	63.1	A	2.4	A	27.7	A	4.3	A	gb:NM_152475.1 /DB_XREF=gi:22748992 /TID=Hs2.380494.1 /CNT=10 /FEA=FLmRNA /TIER=FL /STK=2 /LL=147687 /UG_GENE=MGC34079 /UG=Hs.380494 /UG_TITLE=hypothetical protein MGC34079 /DEF=Homo sapiens hypothetical protein MGC34079 (MGC34079), mRNA. /FL=gb:NM_152475.1 gb:BC025783.1
1552785_at	103.3	A	45.8	M	63.7	A	92.9	P	33.1	A	73.8	A	92.8	A	43.3	A	80.8	A	54	A	42.4	A	80.1	P	gb:NM_152605.1 /DB_XREF=gi:23097326 /TID=Hs2.325834.1 /CNT=10 /FEA=FLmRNA /TIER=FL /STK=2 /LL=163115 /UG_GENE=FLJ37549 /UG=Hs.325834 /UG_TITLE=hypothetical protein FLJ37549 /DEF=Homo sapiens hypothetical protein FLJ37549 (FLJ37549), mRNA. /FL=gb:NM_152605.1
1552787_at	9.1	A	97.1	A	50.5	A	49.1	A	10.1	A	63.7	A	20.8	A	46.7	A	11.3	A	6.5	A	86.2	A	62	A	gb:NM_033647.1 /DB_XREF=gi:21703699 /GEN=HELB /TID=Hs2.192323.1 /CNT=9 /FEA=FLmRNA /TIER=FL /STK=2 /LL=92797 /UG=Hs.192323 /DEF=Homo sapiens helicase (DNA) B (HELB), mRNA. /PROD=helicase (DNA) B /FL=gb:AF319995.1 gb:NM_033647.1
1552788_a_at	129.9	A	101.5	P	51	A	146.4	A	184.8	P	143	A	36.4	A	148.3	A	102.3	A	61.2	A	47.7	A	25.6	A	gb:NM_033647.1 /DB_XREF=gi:21703699 /GEN=HELB /TID=Hs2.192323.1 /CNT=9 /FEA=FLmRNA /TIER=FL /STK=2 /LL=92797 /UG=Hs.192323 /DEF=Homo sapiens helicase (DNA) B (HELB), mRNA. /PROD=helicase (DNA) B /FL=gb:AF319995.1 gb:NM_033647.1
1552789_at	166.9	P	162.1	P	28.3	A	102.1	P	73.1	P	179.7	P	28.3	A	119.8	P	163.9	P	23.2	A	143.9	P	173.3	P	gb:NM_153039.1 /DB_XREF=gi:23308546 /TID=Hs2.283326.1 /CNT=9 /FEA=FLmRNA /TIER=FL /STK=2 /LL=151826 /UG_GENE=FLJ32803 /UG=Hs.283326 /UG_TITLE=hypothetical protein FLJ32803 /DEF=Homo sapiens hypothetical protein FLJ32803 (FLJ32803), mRNA. /FL=gb:NM_153039.1
1552790_a_at	716.2	P	660.7	P	233.3	P	478.2	P	288	P	495.4	P	307.9	P	483.2	P	654.4	P	219.2	P	460.1	P	628	P	gb:NM_153039.1 /DB_XREF=gi:23308546 /TID=Hs2.283326.1 /CNT=9 /FEA=FLmRNA /TIER=FL /STK=2 /LL=151826 /UG_GENE=FLJ32803 /UG=Hs.283326 /UG_TITLE=hypothetical protein FLJ32803 /DEF=Homo sapiens hypothetical protein FLJ32803 (FLJ32803), mRNA. /FL=gb:NM_153039.1
1552791_a_at	37.4	A	70.4	A	41.1	A	37.7	A	29	A	47.9	A	8.8	A	19.6	A	37	A	5.4	A	31.6	A	48	A	gb:NM_006073.1 /DB_XREF=gi:5174724 /GEN=TRDN /TID=Hs2.23926.1 /CNT=8 /FEA=FLmRNA /TIER=FL /STK=2 /LL=10345 /UG=Hs.23926 /DEF=Homo sapiens triadin (TRDN), mRNA. /PROD=triadin /FL=gb:NM_006073.1 gb:U18985.1
1552792_at	272.5	P	326.3	P	122.1	P	308	P	95.3	P	174.5	P	165.8	A	75.6	A	102.3	A	172.4	P	134.1	P	68.3	P	gb:NM_080867.1 /DB_XREF=gi:18254465 /GEN=SOCS7 /TID=Hs2.352327.1 /CNT=8 /FEA=FLmRNA /TIER=FL /STK=2 /LL=122809 /UG=Hs.352327 /DEF=Homo sapiens suppressor of cytokine signaling 7 (SOCS7), mRNA. /PROD=suppressor of cytokine signaling 7 /FL=gb:NM_080867.1 gb:AF424815.1
1552793_at	36.1	A	81.7	A	25.5	A	73.9	A	450.5	P	26.1	A	155.1	A	53.4	A	16.9	A	29.4	A	25.9	A	35.7	A	gb:NM_173687.1 /DB_XREF=gi:27735122 /TID=Hs2.211038.1 /CNT=8 /FEA=FLmRNA /TIER=FL /STK=2 /LL=286122 /UG_GENE=FLJ37131 /UG=Hs.211038 /UG_TITLE=hypothetical protein FLJ37131 /DEF=Homo sapiens hypothetical protein FLJ37131 (FLJ37131), mRNA. /FL=gb:NM_173687.1
1552794_a_at	74.1	A	82	A	30.9	A	3.2	A	8.3	A	47	A	90	A	88.3	P	16.9	A	64.5	A	62.4	A	45	A	gb:NM_173631.1 /DB_XREF=gi:27734991 /TID=Hs2.170990.1 /CNT=8 /FEA=FLmRNA /TIER=FL /STK=2 /LL=284306 /UG_GENE=FLJ31100 /UG=Hs.170990 /UG_TITLE=hypothetical protein FLJ31100 /DEF=Homo sapiens hypothetical protein FLJ31100 (FLJ31100), mRNA. /FL=gb:NM_173631.1
1552796_a_at	34.7	A	70.4	A	51.5	A	99.9	A	43.4	A	38.1	A	217	A	47	A	109.2	A	53.8	A	57.9	A	11.3	A	gb:NM_005068.2 /DB_XREF=gi:21614541 /GEN=SIM1 /TID=Hs2.105925.1 /CNT=7 /FEA=FLmRNA /TIER=FL /STK=2 /LL=6492 /UG=Hs.105925 /DEF=Homo sapiens single-minded homolog 1 (Drosophila) (SIM1), mRNA. /PROD=single-minded (Drosophila) homolog 1 /FL=gb:U70212.1 gb:NM_005068.2
1552797_s_at	12.5	A	209.5	P	57	A	61.7	P	37.8	A	131.3	P	169.2	P	46.6	P	85.7	A	91.4	A	31.7	A	120.5	P	gb:NM_144707.1 /DB_XREF=gi:21389622 /GEN=PROM-2 /TID=Hs2.145582.1 /CNT=7 /FEA=FLmRNA /TIER=FL /STK=2 /LL=150696 /UG=Hs.145582 /DEF=Homo sapiens prominin-2 (PROM-2), mRNA. /PROD=prominin-related protein /FL=gb:NM_144707.1 gb:AF245303.1
1552798_a_at	126.2	A	65.5	A	280	P	280.9	A	259.3	A	357.1	A	178.6	A	92.4	A	258.2	A	635.1	P	71.1	A	97.6	A	gb:NM_138557.1 /DB_XREF=gi:19924152 /GEN=TLR4 /TID=Hs2.159239.2 /CNT=7 /FEA=FLmRNA /TIER=FL /STK=2 /LL=7099 /UG=Hs.159239 /DEF=Homo sapiens toll-like receptor 4 (TLR4), transcript variant 4, mRNA. /PROD=toll-like receptor 4 isoform D /FL=gb:NM_138557.1
1552799_at	46.3	A	52.3	A	24.2	A	26.4	A	20	A	29	A	78.4	A	15.9	A	46.9	A	21.3	A	17.5	A	31.6	A	gb:NM_145003.1 /DB_XREF=gi:21450718 /TID=Hs2.351354.1 /CNT=7 /FEA=FLmRNA /TIER=FL /STK=2 /LL=203062 /UG_GENE=FLJ31164 /UG=Hs.351354 /UG_TITLE=hypothetical protein FLJ31164 /DEF=Homo sapiens hypothetical protein FLJ31164 (FLJ31164), mRNA. /FL=gb:NM_145003.1
1552800_at	404.4	A	74.5	A	306.3	A	65	A	644.5	A	55.6	A	183.9	A	134.4	A	65	A	239.6	A	67.4	A	54	A	gb:NM_148916.1 /DB_XREF=gi:23200017 /GEN=WBSCR21 /TID=Hs2.182476.3 /CNT=7 /FEA=FLmRNA /TIER=FL /STK=2 /LL=83451 /UG=Hs.182476 /DEF=Homo sapiens Williams Beuren syndrome chromosome region 21 (WBSCR21), transcript variant 6, mRNA. /PROD=Williams Beuren syndrome chromosome region 21isoform 5 /FL=gb:NM_148916.1 gb:AF412032.1
1552801_at	15.4	A	126.4	A	79.3	A	6.9	A	18.7	A	110.5	A	79.1	A	11.2	A	87.4	A	93.5	A	23.5	A	48.2	A	gb:NM_144575.1 /DB_XREF=gi:21389342 /GEN=CAPN13 /TID=Hs2.325335.1 /CNT=6 /FEA=FLmRNA /TIER=FL /STK=2 /LL=92291 /UG=Hs.325335 /DEF=Homo sapiens calpain 13 (CAPN13), mRNA. /PROD=calpain 13 /FL=gb:NM_144575.1
1552803_a_at	37.8	A	19.1	A	7	A	28	A	17.9	A	30.9	A	34.9	A	57.8	A	16.3	A	13.6	A	69.7	A	23.9	A	gb:NM_152497.1 /DB_XREF=gi:22749042 /TID=Hs2.310758.1 /CNT=6 /FEA=FLmRNA /TIER=FL /STK=2 /LL=149421 /UG_GENE=FLJ32206 /UG=Hs.310758 /UG_TITLE=hypothetical protein FLJ32206 /DEF=Homo sapiens hypothetical protein FLJ32206 (FLJ32206), mRNA. /FL=gb:NM_152497.1
1552804_a_at	264.3	A	407.3	A	273.9	A	170	A	162.6	A	449.9	P	279.9	A	182.2	A	270.4	A	305.7	A	98.5	A	264.2	A	gb:NM_148910.1 /DB_XREF=gi:22547218 /GEN=TIRAP /TID=Hs2.17681.2 /CNT=6 /FEA=FLmRNA /TIER=FL /STK=2 /LL=114609 /UG=Hs.17681 /DEF=Homo sapiens Toll-interleukin 1 receptor (TIR) domain-containing adapter protein (TIRAP), transcript variant 2, mRNA. /PROD=Toll-interleukin 1 receptor (TIR)domain-containing adapter protein isoform b /FL=gb:AF378129.1 gb:AF406652.1 gb:NM_148910.1
1552806_a_at	139.9	A	63.2	A	95	A	13	A	89.6	A	34.5	A	60.4	A	29.7	A	128	A	51.6	A	11.4	A	55.4	A	gb:NM_033130.1 /DB_XREF=gi:15055512 /GEN=SIGLEC10 /TID=Hs2.335337.1 /CNT=5 /FEA=FLmRNA /TIER=FL /STK=2 /LL=89790 /UG=Hs.335337 /DEF=Homo sapiens sialic acid binding Ig-like lectin 10 (SIGLEC10), mRNA. /PROD=sialic acid binding Ig-like lectin 10 /FL=gb:NM_033130.1 gb:AF301007.1 gb:AF310233.1
1552807_a_at	30.6	A	47.7	A	14.3	A	86.4	A	16.8	A	43.8	A	305.2	A	44.1	A	22.1	A	11.3	A	20.1	A	17.6	A	gb:AF301007.1 /DB_XREF=gi:21956185 /GEN=SIGLEC10 /TID=Hs2.335337.1 /CNT=5 /FEA=FLmRNA /TIER=FL /STK=1 /LL=89790 /UG=Hs.335337 /DEF=Homo sapiens sialic acid-binding immunoglobin-like lectin 10 (SIGLEC10) mRNA, complete cds. /PROD=sialic acid-binding immunoglobin-like lectin 10 /FL=gb:NM_033130.1 gb:AF301007.1 gb:AF310233.1
1552808_at	69.1	A	7.6	A	43.5	A	30.7	A	63.6	A	26	A	95.6	A	6.7	A	17	A	19.5	A	26.7	A	27.4	A	gb:NM_139264.1 /DB_XREF=gi:21327694 /GEN=ADAMTSL1 /TID=Hs2.275184.2 /CNT=5 /FEA=FLmRNA /TIER=FL /STK=2 /LL=92949 /UG=Hs.275184 /DEF=Homo sapiens ADAMTS-like 1 (ADAMTSL1), transcript variant 3, mRNA. /PROD=ADAM-TS related protein 1 isoform 3 /FL=gb:BC030262.1 gb:NM_139264.1
1552809_at	51.8	A	92.8	A	84	A	84.6	M	79.6	A	64.9	A	174	M	66.8	A	34.6	A	47.3	A	25.7	A	46.3	A	gb:NM_002920.3 /DB_XREF=gi:19743887 /GEN=RFX4 /TID=Hs2.21273.2 /CNT=5 /FEA=FLmRNA /TIER=FL /STK=2 /LL=5992 /UG=Hs.21273 /DEF=Homo sapiens regulatory factor X, 4 (influences HLA class II expression) (RFX4), transcript variant 2, mRNA. /PROD=regulatory factor X4, isoform b /FL=gb:NM_002920.3 gb:AB044245.1
1552811_at	64.9	A	27.1	A	17.5	A	40	A	108.8	A	52.7	A	58.4	A	16.7	A	47.9	A	40.6	A	57.8	A	69.4	A	gb:NM_053284.1 /DB_XREF=gi:16751922 /GEN=WFIKKN /TID=Hs2.345818.1 /CNT=5 /FEA=FLmRNA /TIER=FL /STK=2 /LL=117166 /UG=Hs.345818 /DEF=Homo sapiens WAP, FS, Ig, KU, and NTR-containing protein (WFIKKN), mRNA. /PROD=WFIKKN protein precursor /FL=gb:NM_053284.1 gb:AF422194.1
1552812_a_at	402.3	P	346.6	P	216.2	P	494.2	P	364.4	P	300.2	P	502.6	P	244.5	P	261.5	P	358.5	P	621.3	P	178.6	P	gb:NM_014554.1 /DB_XREF=gi:7657549 /GEN=SENP1 /TID=Hs2.66450.1 /CNT=5 /FEA=FLmRNA /TIER=FL /STK=2 /LL=29843 /UG=Hs.66450 /DEF=Homo sapiens sentrinSUMO-specific protease (SENP1), mRNA. /PROD=sentrinSUMO-specific protease 1 /FL=gb:NM_014554.1 gb:AF149770.1
1552813_at	65.7	A	17.5	A	33.5	A	25.8	A	11.3	A	186.8	A	31.9	A	77.5	A	11.7	A	17.1	A	16.1	A	15.5	A	gb:NM_138693.1 /DB_XREF=gi:20162553 /GEN=BTEB5 /TID=Hs2.125240.1 /CNT=5 /FEA=FLmRNA /TIER=FL /STK=2 /LL=136259 /UG=Hs.125240 /DEF=Homo sapiens BTE-binding protein 5 (BTEB5), mRNA. /PROD=BTE-binding protein 5 /FL=gb:NM_138693.1 gb:AF490374.1
1552814_a_at	65.8	A	50.8	A	149.2	A	111.7	A	25.6	A	133.7	A	191.4	A	74	A	95.9	A	107.6	A	183.8	A	177.2	A	gb:NM_138693.1 /DB_XREF=gi:20162553 /GEN=BTEB5 /TID=Hs2.125240.1 /CNT=5 /FEA=FLmRNA /TIER=FL /STK=2 /LL=136259 /UG=Hs.125240 /DEF=Homo sapiens BTE-binding protein 5 (BTEB5), mRNA. /PROD=BTE-binding protein 5 /FL=gb:NM_138693.1 gb:AF490374.1
1552816_at	46.8	A	60.3	A	90.9	P	56.6	A	65.3	A	62.8	A	138.3	A	34.4	A	59.4	A	15.8	A	9.1	A	29.3	A	gb:NM_145283.1 /DB_XREF=gi:21699083 /TID=Hs2.309216.1 /CNT=5 /FEA=FLmRNA /TIER=FL /STK=2 /LL=158046 /UG_GENE=LOC158046 /UG=Hs.309216 /UG_TITLE=similar to hypothetical protein BC014127 /DEF=Homo sapiens similar to hypothetical protein BC014127 (LOC158046), mRNA. /FL=gb:BC022521.1 gb:NM_145283.1
1552818_a_at	49.3	A	12	A	17.2	A	11.2	A	5.5	A	13.9	A	22.2	A	19.4	A	69.9	A	19.9	A	14.9	A	7	A	gb:NM_001727.1 /DB_XREF=gi:4502454 /GEN=BRS3 /TID=Hs2.121484.1 /CNT=5 /FEA=FLmRNA /TIER=FL /STK=2 /LL=680 /UG=Hs.121484 /DEF=Homo sapiens bombesin-like receptor 3 (BRS3), mRNA. /PROD=bombesin-like receptor 3 /FL=gb:NM_001727.1 gb:L08893.1
1552819_at	86.7	A	144.8	A	20.5	A	70.5	A	57.2	A	101.6	P	116.1	A	101.4	A	118.9	A	182.7	P	15.3	A	96.6	A	gb:NM_153454.1 /DB_XREF=gi:23592235 /TID=Hs2.433522.1 /CNT=5 /FEA=FLmRNA /TIER=FL /STK=2 /LL=257103 /UG_GENE=C21orf86 /UG=Hs.433522 /UG_TITLE=chromosome 21 open reading frame 86 /DEF=Homo sapiens chromosome 21 open reading frame 86 (C21orf86), mRNA. /FL=gb:NM_153454.1 gb:AF426264.1
1552822_at	59.1	A	54.5	P	76.5	P	22.2	A	13.5	A	21.1	A	22.6	A	31.4	A	58.4	A	46.5	A	83.6	P	51.9	P	gb:NM_019022.1 /DB_XREF=gi:23680894 /TID=Hs2.96900.1 /CNT=5 /FEA=FLmRNA /TIER=FL /STK=2 /LL=54495 /UG_GENE=FLJ20793 /UG=Hs.96900 /UG_TITLE=hypothetical protein FLJ20793 /DEF=Homo sapiens hypothetical protein FLJ20793 (FLJ20793), mRNA. /FL=gb:BC032325.1 gb:NM_019022.1
1552825_at	57.6	A	120	A	31	A	56.5	P	7.9	A	5.8	A	137.6	A	49	A	6	A	22.3	A	13.9	A	46.2	A	gb:NM_145756.1 /DB_XREF=gi:21955238 /GEN=ZNF396 /TID=Hs2.351005.1 /CNT=7 /FEA=FLmRNA /TIER=FL /STK=2 /LL=252884 /UG=Hs.351005 /DEF=Homo sapiens zinc finger protein 396 (ZNF396), mRNA. /PROD=zinc finger protein 396 /FL=gb:NM_145756.1
1552826_at	5.5	A	1.8	A	4.2	A	19.8	A	2.8	A	36.5	M	24.2	A	21.7	P	3.6	A	44.3	A	23.9	A	18	A	gb:NM_134266.1 /DB_XREF=gi:20336281 /GEN=SLC26A7 /TID=Hs2.150178.2 /CNT=6 /FEA=FLmRNA /TIER=FL /STK=2 /LL=115111 /UG=Hs.150178 /DEF=Homo sapiens solute carrier family 26, member 7 (SLC26A7), transcript variant 2, mRNA. /PROD=solute carrier family 26, member 7, isoform b /FL=gb:NM_134266.1
1552827_s_at	14.7	A	66.6	A	62.1	A	98.6	A	84.8	A	14.6	A	174	P	70.3	A	92.6	A	36.2	A	138.1	A	52.6	A	gb:NM_134266.1 /DB_XREF=gi:20336281 /GEN=SLC26A7 /TID=Hs2.150178.2 /CNT=6 /FEA=FLmRNA /TIER=FL /STK=2 /LL=115111 /UG=Hs.150178 /DEF=Homo sapiens solute carrier family 26, member 7 (SLC26A7), transcript variant 2, mRNA. /PROD=solute carrier family 26, member 7, isoform b /FL=gb:NM_134266.1
1552828_at	97.4	A	176.2	A	176.9	A	90.5	A	136.5	A	150.5	A	136	A	88.8	A	103	A	95.9	A	145.3	A	98.8	A	gb:NM_052870.1 /DB_XREF=gi:16418370 /GEN=SNAG1 /TID=Hs2.297325.1 /CNT=6 /FEA=FLmRNA /TIER=FL /STK=2 /LL=112574 /UG=Hs.297325 /DEF=Homo sapiens sorting nexin associated golgi protein 1 (SNAG1), mRNA. /PROD=sorting nexin associated golgi protein 1 /FL=gb:AF395536.1 gb:NM_052870.1
1552829_at	169.8	P	196.2	A	93.9	A	104.7	A	181.1	A	115.6	A	345.2	P	112.3	A	120.4	A	142.4	A	170.7	A	163.6	A	gb:NM_018505.2 /DB_XREF=gi:20591437 /TID=Hs2.283029.1 /CNT=6 /FEA=FLmRNA /TIER=FL /STK=2 /LL=55376 /UG_GENE=PRO1728 /UG=Hs.283029 /UG_TITLE=hypothetical protein PRO1728 /DEF=Homo sapiens hypothetical protein PRO1728 (PRO1728), mRNA. /FL=gb:NM_018505.2
1552830_at	47.1	A	65.9	A	131.9	A	38.4	A	120.4	A	22.8	A	133.4	A	44.8	A	97.4	A	20.8	A	98.4	A	37.3	A	gb:NM_153230.1 /DB_XREF=gi:23397499 /TID=Hs2.368364.1 /CNT=6 /FEA=FLmRNA /TIER=FL /STK=2 /LL=162517 /UG_GENE=MGC35179 /UG=Hs.368364 /UG_TITLE=hypothetical protein MGC35179 /DEF=Homo sapiens hypothetical protein MGC35179 (MGC35179), mRNA. /FL=gb:BC034782.1 gb:NM_153230.1
1552833_at	30.1	A	40.8	A	19.8	A	41	A	50.5	A	25.7	A	164.3	A	27	A	70.1	A	26.1	A	28.5	A	27.9	A	gb:NM_138706.1 /DB_XREF=gi:20162575 /GEN=IMAGE:4907098 /TID=Hs2.352622.1 /CNT=5 /FEA=FLmRNA /TIER=FL /STK=2 /LL=192134 /UG=Hs.352622 /DEF=Homo sapiens beta-1,3-N-acetylglucosaminyltransferase protein (IMAGE:4907098), mRNA. /PROD=beta-1,3-N-acetylglucosaminyltransferaseprotein /FL=gb:AB073740.1 gb:NM_138706.1
1552834_at	10.2	A	39.1	A	19.9	A	86	A	11.5	A	21.8	A	31	A	11.4	A	110.4	A	30.1	A	29.7	A	18.7	A	gb:BC025357.1 /DB_XREF=gi:19263731 /TID=Hs2.352622.1 /CNT=5 /FEA=FLmRNA /TIER=ConsEnd /STK=0 /LL=192134 /UG_GENE=IMAGE:4907098 /UG=Hs.352622 /UG_TITLE=beta-1,3-N-acetylglucosaminyltransferase protein /DEF=Homo sapiens, clone IMAGE:4907098, mRNA, partial cds. /FL=gb:AB073740.1 gb:NM_138706.1
1552835_at	74.5	A	59.7	A	30.7	A	44.7	A	38	A	2.4	A	11.7	A	48.6	A	9.6	A	62.6	A	79.3	A	55.9	A	gb:NM_144977.1 /DB_XREF=gi:21450670 /TID=Hs2.352164.1 /CNT=5 /FEA=FLmRNA /TIER=FL /STK=2 /LL=163486 /UG_GENE=MGC27044 /UG=Hs.352164 /UG_TITLE=hypothetical protein MGC27044 /DEF=Homo sapiens hypothetical protein MGC27044 (MGC27044), mRNA. /FL=gb:NM_144977.1 gb:BC022561.1
1552836_at	284.5	A	276	A	317	A	351.8	P	506.5	P	231.8	A	245.3	A	283.8	P	311.1	A	374.3	A	273.2	A	344.4	A	gb:NM_173656.1 /DB_XREF=gi:27734906 /TID=Hs2.407159.1 /CNT=5 /FEA=FLmRNA /TIER=FL /STK=2 /LL=285267 /UG_GENE=FLJ90764 /UG=Hs.407159 /UG_TITLE=hypothetical protein FLJ90764 /DEF=Homo sapiens hypothetical protein FLJ90764 (FLJ90764), mRNA. /FL=gb:NM_173656.1
1552837_at	23.8	A	32.2	A	0.8	A	9.2	A	26.5	P	32.9	A	19.6	A	30.7	P	4	A	1.4	A	4.1	A	2.5	A	gb:NM_173041.1 /DB_XREF=gi:27477123 /GEN=ICK /TID=Hs2.108850.2 /CNT=5 /FEA=FLmRNA /TIER=FL /STK=2 /LL=22858 /UG=Hs.108850 /DEF=Homo sapiens intestinal cell kinase (ICK), transcript variant 3, mRNA. /PROD=intestinal cell kinase isoform b /FL=gb:NM_173041.1 gb:BC035807.1
1552839_at	63.8	A	38.7	A	23.6	A	32.5	A	21.4	A	11.2	A	14.7	A	31.3	A	35.7	A	6.9	A	23	A	85.1	A	gb:NM_173526.1 /DB_XREF=gi:27734950 /TID=Hs2.412818.1 /CNT=5 /FEA=FLmRNA /TIER=FL /STK=2 /LL=161142 /UG_GENE=C14orf54 /UG=Hs.412818 /UG_TITLE=chromosome 14 open reading frame 54 /DEF=Homo sapiens chromosome 14 open reading frame 54 (C14orf54), mRNA. /FL=gb:NM_173526.1
1552841_s_at	114.9	A	173.5	A	5.3	A	40.5	A	77	A	67.2	A	74.1	A	27.7	A	70.1	A	9.6	A	57.9	A	104.4	A	gb:NM_138724.1 /DB_XREF=gi:21040331 /GEN=BCLG /TID=Hs2.11962.3 /CNT=5 /FEA=FLmRNA /TIER=FL /STK=2 /LL=79370 /UG=Hs.11962 /DEF=Homo sapiens apoptosis regulator BCL-G (BCLG), transcript variant 3, mRNA. /PROD=apoptosis regulator BCL-G, isoform 3 /FL=gb:NM_138724.1 gb:AY040274.1
1552842_at	9.2	A	26.5	A	14.1	A	10.4	A	68.3	A	41.8	A	41.7	A	4.3	A	93.2	A	25.8	A	24.3	A	31.9	A	gb:NM_153456.1 /DB_XREF=gi:23592239 /GEN=HS6ST3 /TID=Hs2.381380.1 /CNT=5 /FEA=FLmRNA /TIER=FL /STK=2 /LL=266722 /UG=Hs.381380 /DEF=Homo sapiens heparan sulfate 6-O-sulfotransferase 3 (HS6ST3), mRNA. /PROD=heparan sulfate 6-O-sulfotransferase 3 /FL=gb:NM_153456.1 gb:AF539426.1
1552843_at	7.5	A	5.3	A	11.4	A	3.1	A	6.9	A	14.2	A	68	A	8.8	A	7.9	A	8	A	4.7	A	8.6	A	gb:NM_134425.1 /DB_XREF=gi:20336273 /GEN=SLC26A1 /TID=Hs2.302008.1 /CNT=5 /FEA=FLmRNA /TIER=FL /STK=2 /LL=10861 /UG=Hs.302008 /DEF=Homo sapiens solute carrier family 26 (sulfate transporter), member 1 (SLC26A1), transcript variant 2, mRNA. /PROD=solute carrier family 26, member 1, isoform b /FL=gb:BC015517.1 gb:NM_134425.1
1552845_at	59.6	A	64.6	A	102.7	A	234.1	A	18.9	A	36.4	A	269	A	40.1	A	59.3	A	238.3	A	95.1	A	42.7	A	gb:NM_138429.1 /DB_XREF=gi:20149319 /GEN=CLDN15 /TID=Hs2.38738.2 /CNT=5 /FEA=FLmRNA /TIER=FL /STK=2 /LL=24146 /UG=Hs.38738 /DEF=Homo sapiens claudin 15 (CLDN15), mRNA. /PROD=claudin 15 /FL=gb:BC010160.1 gb:NM_138429.1
1552846_s_at	315.5	A	346.8	A	220.1	A	149.4	A	38.8	A	78.4	A	117.6	A	203.3	A	306.8	A	412.3	A	178	A	103.2	A	gb:NM_152304.1 /DB_XREF=gi:22748674 /TID=Hs2.406358.1 /CNT=5 /FEA=FLmRNA /TIER=FL /STK=2 /LL=115273 /UG_GENE=MGC45806 /UG=Hs.406358 /UG_TITLE=hypothetical protein MGC45806 /DEF=Homo sapiens hypothetical protein MGC45806 (MGC45806), mRNA. /FL=gb:BC033175.1 gb:NM_152304.1
1552848_a_at	139	A	33.7	A	36	A	68.8	A	115.1	A	50.3	A	147.6	A	39.8	A	128.7	A	87.1	A	65.2	A	295.7	P	gb:NM_173495.1 /DB_XREF=gi:27735090 /TID=Hs2.319503.1 /CNT=4 /FEA=FLmRNA /TIER=FL /STK=2 /LL=139411 /UG_GENE=FLJ30296 /UG=Hs.319503 /UG_TITLE=hypothetical protein FLJ30296 /DEF=Homo sapiens hypothetical protein FLJ30296 (FLJ30296), mRNA. /FL=gb:NM_173495.1
1552849_at	16.6	A	1.3	A	13.1	A	10	A	13.9	A	3.6	A	9.9	A	26.4	A	9.6	A	2.7	A	18.3	A	4.3	A	gb:NM_138804.2 /DB_XREF=gi:21314782 /TID=Hs2.348645.1 /CNT=4 /FEA=FLmRNA /TIER=FL /STK=2 /LL=130951 /UG_GENE=LOC130951 /UG=Hs.348645 /UG_TITLE=hypothetical protein BC014602 /DEF=Homo sapiens hypothetical protein BC014602 (LOC130951), mRNA. /FL=gb:NM_138804.2 gb:BC025997.1
1552851_at	3.6	A	49.7	A	5.5	A	2.2	A	6.1	A	13	A	14	A	5.1	A	12.3	A	5.4	A	7.8	A	4.5	A	gb:NM_152677.1 /DB_XREF=gi:22749364 /TID=Hs2.308058.1 /CNT=4 /FEA=FLmRNA /TIER=FL /STK=2 /LL=201516 /UG_GENE=FLJ35105 /UG=Hs.308058 /UG_TITLE=hypothetical protein FLJ35105 /DEF=Homo sapiens hypothetical protein FLJ35105 (FLJ35105), mRNA. /FL=gb:NM_152677.1
1552852_a_at	93.4	A	159.5	A	21.2	A	37.4	A	88.2	A	54.3	A	38.6	A	3.2	A	9.6	A	112.3	A	79.9	A	71.3	A	gb:NM_152677.1 /DB_XREF=gi:22749364 /TID=Hs2.308058.1 /CNT=4 /FEA=FLmRNA /TIER=FL /STK=2 /LL=201516 /UG_GENE=FLJ35105 /UG=Hs.308058 /UG_TITLE=hypothetical protein FLJ35105 /DEF=Homo sapiens hypothetical protein FLJ35105 (FLJ35105), mRNA. /FL=gb:NM_152677.1
1552853_at	21.1	A	10.7	A	71.8	A	6.5	A	71.9	A	19	A	97.8	A	25.6	A	29.3	A	85.9	A	17.5	A	27.7	A	gb:NM_144623.1 /DB_XREF=gi:21389444 /TID=Hs2.208076.1 /CNT=4 /FEA=FLmRNA /TIER=FL /STK=2 /LL=127731 /UG_GENE=FLJ32784 /UG=Hs.208076 /UG_TITLE=hypothetical protein FLJ32784 /DEF=Homo sapiens hypothetical protein FLJ32784 (FLJ32784), mRNA. /FL=gb:NM_144623.1
1552854_a_at	15.9	A	8.2	A	5.8	A	6.7	A	14.9	A	10.5	A	24.3	A	16.4	A	12.8	A	6.3	A	7.2	A	7.1	A	gb:NM_144623.1 /DB_XREF=gi:21389444 /TID=Hs2.208076.1 /CNT=4 /FEA=FLmRNA /TIER=FL /STK=2 /LL=127731 /UG_GENE=FLJ32784 /UG=Hs.208076 /UG_TITLE=hypothetical protein FLJ32784 /DEF=Homo sapiens hypothetical protein FLJ32784 (FLJ32784), mRNA. /FL=gb:NM_144623.1
1552856_at	83.4	P	86.9	A	89.6	A	75.6	A	45.6	A	4.6	A	105.5	A	64.5	P	65.6	A	33.8	A	45.2	A	57.9	A	gb:NM_153238.1 /DB_XREF=gi:23397519 /TID=Hs2.375058.1 /CNT=4 /FEA=FLmRNA /TIER=FL /STK=2 /LL=197196 /UG_GENE=MGC22001 /UG=Hs.375058 /UG_TITLE=hypothetical protein MGC22001 /DEF=Homo sapiens hypothetical protein MGC22001 (MGC22001), mRNA. /FL=gb:NM_153238.1 gb:BC030801.1
1552857_a_at	11.7	A	6	A	7.3	A	2.9	A	10	A	25.3	A	25	A	44	A	11	A	26.9	A	9.2	A	9.4	A	gb:NM_000871.1 /DB_XREF=gi:4504544 /GEN=HTR6 /TID=Hs2.22180.1 /CNT=4 /FEA=FLmRNA /TIER=FL /STK=2 /LL=3362 /UG=Hs.22180 /DEF=Homo sapiens 5-hydroxytryptamine (serotonin) receptor 6 (HTR6), mRNA. /PROD=5-hydroxytryptamine (serotonin) receptor 6 /FL=gb:NM_000871.1 gb:L41147.1
1552858_at	53.6	A	1.5	A	27.7	A	10.3	A	23.6	A	1.3	A	6.5	A	7.2	A	41.6	A	16.1	A	21.2	A	11.4	A	gb:NM_173523.1 /DB_XREF=gi:27734966 /TID=Hs2.376011.1 /CNT=4 /FEA=FLmRNA /TIER=FL /STK=2 /LL=158809 /UG_GENE=FLJ40242 /UG=Hs.376011 /UG_TITLE=hypothetical protein FLJ40242 /DEF=Homo sapiens hypothetical protein FLJ40242 (FLJ40242), mRNA. /FL=gb:NM_173523.1
1552860_at	11	A	18.7	A	7.3	A	6.3	A	6	A	6.2	A	22.9	A	5.2	A	16.3	A	12.3	A	19.7	A	18.2	A	gb:NM_145653.1 /DB_XREF=gi:21717823 /GEN=TCEB3L2 /TID=Hs2.375035.1 /CNT=4 /FEA=FLmRNA /TIER=FL /STK=2 /LL=162699 /UG=Hs.375035 /DEF=Homo sapiens elongin A3 (TCEB3L2), mRNA. /PROD=elongin A3 /FL=gb:NM_145653.1 gb:AB076840.1
1552862_at	21.5	A	40.5	A	115.7	A	110.1	A	219.4	A	20.7	A	42.2	A	109	A	99.6	A	81.5	A	53	A	151.3	A	gb:NM_173639.1 /DB_XREF=gi:27735030 /TID=Hs2.131810.1 /CNT=4 /FEA=FLmRNA /TIER=FL /STK=2 /LL=284618 /UG_GENE=FLJ35976 /UG=Hs.131810 /UG_TITLE=hypothetical protein FLJ35976 /DEF=Homo sapiens hypothetical protein FLJ35976 (FLJ35976), mRNA. /FL=gb:NM_173639.1
1552863_a_at	849.3	P	929.4	P	589.9	P	607.3	P	875	P	586.9	P	1231.9	P	509.1	P	1050.4	P	1264.9	P	1147.7	P	631.6	P	gb:NM_145815.1 /DB_XREF=gi:22027556 /GEN=CACNG6 /TID=Hs2.326764.1 /CNT=4 /FEA=FLmRNA /TIER=FL /STK=2 /LL=59285 /UG=Hs.326764 /DEF=Homo sapiens calcium channel, voltage-dependent, gamma subunit 6 (CACNG6), transcript variant 2, mRNA. /PROD=voltage-dependent calcium channel gamma-6subunit isoform b /FL=gb:NM_145815.1
1552865_a_at	68.1	A	177	A	144.6	A	122	A	143.7	A	145.7	A	317.2	A	110.6	A	192.3	A	68.8	A	169.7	A	69.2	A	gb:NM_152590.1 /DB_XREF=gi:22749214 /TID=Hs2.369235.1 /CNT=4 /FEA=FLmRNA /TIER=FL /STK=2 /LL=160492 /UG_GENE=FLJ36004 /UG=Hs.369235 /UG_TITLE=hypothetical protein FLJ36004 /DEF=Homo sapiens hypothetical protein FLJ36004 (FLJ36004), mRNA. /FL=gb:NM_152590.1
1552867_at	88.4	A	54.3	A	59.6	A	61.1	A	72.1	A	73.1	A	72.2	A	29.9	A	96.1	A	83.3	A	26.6	A	7.8	A	gb:NM_138474.1 /DB_XREF=gi:19924006 /TID=Hs2.334913.1 /CNT=4 /FEA=FLmRNA /TIER=FL /STK=2 /LL=144845 /UG_GENE=LOC144845 /UG=Hs.334913 /UG_TITLE=hypothetical protein BC008631 /DEF=Homo sapiens hypothetical protein BC008631 (LOC144845), mRNA. /FL=gb:NM_138474.1 gb:BC008631.1
1552868_at	84.7	A	118.2	A	136.3	A	23	A	164.3	A	37.7	A	284	A	101.1	A	82.9	A	72.7	A	53	A	125.9	A	gb:NM_152480.1 /DB_XREF=gi:22749010 /TID=Hs2.358026.1 /CNT=4 /FEA=FLmRNA /TIER=FL /STK=2 /LL=148046 /UG_GENE=MGC39338 /UG=Hs.358026 /UG_TITLE=hypothetical protein MGC39338 /DEF=Homo sapiens hypothetical protein MGC39338 (MGC39338), mRNA. /FL=gb:BC026041.1 gb:NM_152480.1
1552870_s_at	71.1	P	45.6	P	8.2	A	22.6	A	30.4	A	2.6	A	18.4	A	13.6	A	25.8	A	7.5	A	53	A	6.6	A	gb:NM_144696.1 /DB_XREF=gi:21389602 /TID=Hs2.262208.1 /CNT=4 /FEA=FLmRNA /TIER=FL /STK=2 /LL=148436 /UG_GENE=FLJ25438 /UG=Hs.262208 /UG_TITLE=hypothetical protein FLJ25438 /DEF=Homo sapiens hypothetical protein FLJ25438 (FLJ25438), mRNA. /FL=gb:NM_144696.1
1552872_at	124.5	A	50.8	A	10.2	A	156.3	A	16.8	A	66.6	A	69.9	A	32.4	A	81.8	A	52.5	A	43.7	A	50.4	A	gb:NM_025091.2 /DB_XREF=gi:18594499 /TID=Hs2.161137.1 /CNT=4 /FEA=FLmRNA /TIER=FL /STK=2 /LL=80161 /UG_GENE=FLJ13330 /UG=Hs.161137 /UG_TITLE=hypothetical protein FLJ13330 /DEF=Homo sapiens hypothetical protein FLJ13330 (FLJ13330), mRNA. /FL=gb:AF193043.2 gb:NM_025091.2
1552873_s_at	544.4	A	547.4	A	266.7	A	381.4	A	454.3	A	85.4	A	645.2	P	468.6	A	581.9	A	703.4	A	329.2	A	670.4	A	gb:NM_025091.2 /DB_XREF=gi:18594499 /TID=Hs2.161137.1 /CNT=4 /FEA=FLmRNA /TIER=FL /STK=2 /LL=80161 /UG_GENE=FLJ13330 /UG=Hs.161137 /UG_TITLE=hypothetical protein FLJ13330 /DEF=Homo sapiens hypothetical protein FLJ13330 (FLJ13330), mRNA. /FL=gb:AF193043.2 gb:NM_025091.2
1552875_a_at	23.4	A	4.5	A	1.6	A	4.6	A	8	A	4.3	A	32.1	A	4	A	4.5	A	8.2	A	3.6	A	62.1	A	gb:NM_138939.1 /DB_XREF=gi:25777654 /GEN=CD200R /TID=Hs2.372638.1 /CNT=4 /FEA=FLmRNA /TIER=FL /STK=2 /LL=131450 /UG=Hs.372638 /DEF=Homo sapiens cell surface glycoprotein receptor CD200 (CD200R), transcript variant 2, mRNA. /PROD=cell surface glycoprotein receptor CD200 isoformb /FL=gb:NM_138939.1 gb:AF497549.1
1552876_at	5.6	A	45.6	A	22.9	A	33.7	A	59.6	M	6.5	A	100.1	M	44.5	A	67.4	A	58.6	A	55	A	56.3	P	gb:NM_153755.1 /DB_XREF=gi:24371263 /TID=Hs2.375832.1 /CNT=4 /FEA=FLmRNA /TIER=FL /STK=2 /LL=114042 /UG_GENE=C21orf89 /UG=Hs.375832 /UG_TITLE=chromosome 21 open reading frame 89 /DEF=Homo sapiens chromosome 21 open reading frame 89 (C21orf89), mRNA. /FL=gb:NM_153755.1 gb:AF426268.1
1552877_s_at	39.7	A	169	A	29.1	A	109.6	A	27.1	A	42.9	A	43.3	A	72.6	A	30	A	93.7	A	21.5	A	34.7	A	gb:NM_153755.1 /DB_XREF=gi:24371263 /TID=Hs2.375832.1 /CNT=4 /FEA=FLmRNA /TIER=FL /STK=2 /LL=114042 /UG_GENE=C21orf89 /UG=Hs.375832 /UG_TITLE=chromosome 21 open reading frame 89 /DEF=Homo sapiens chromosome 21 open reading frame 89 (C21orf89), mRNA. /FL=gb:NM_153755.1 gb:AF426268.1
1552878_at	57.2	A	19.9	A	6	A	5.6	A	32.6	M	54.3	A	84.7	A	2	A	4.5	A	37.3	P	28.9	A	29.4	A	gb:BC032621.1 /DB_XREF=gi:21618609 /TID=Hs2.175396.1 /CNT=6 /FEA=FLmRNA /TIER=FL /STK=2 /LL=220202 /UG_GENE=ATOH7 /UG=Hs.175396 /DEF=Homo sapiens, atonal homolog 7 (Drosophila, clone MGC:45500 IMAGE:5580461, mRNA, complete cds. /PROD=atonal homolog 7 (Drosophila /FL=gb:BC032621.1 gb:NM_145178.1
1552879_a_at	18.5	A	15.3	A	19.5	A	64.9	A	11.5	A	27.2	A	45.1	A	69.7	A	67.2	A	16.7	A	20.6	A	19.8	A	gb:BC032621.1 /DB_XREF=gi:21618609 /TID=Hs2.175396.1 /CNT=6 /FEA=FLmRNA /TIER=FL /STK=2 /LL=220202 /UG_GENE=ATOH7 /UG=Hs.175396 /DEF=Homo sapiens, atonal homolog 7 (Drosophila, clone MGC:45500 IMAGE:5580461, mRNA, complete cds. /PROD=atonal homolog 7 (Drosophila /FL=gb:BC032621.1 gb:NM_145178.1
1552880_at	61.8	A	5.8	A	57.1	P	35.5	A	41.8	A	9.5	A	18	A	15	A	74.4	A	88.5	A	27.4	A	8.5	A	gb:NM_033127.1 /DB_XREF=gi:14916476 /GEN=RGPR /TID=Hs2.293650.1 /CNT=4 /FEA=FLmRNA /TIER=FL /STK=2 /LL=89866 /UG=Hs.293650 /DEF=Homo sapiens regucalcin gene promotor region related protein (RGPR), mRNA. /PROD=regucalcin gene promotor region related protein /FL=gb:AB063357.1 gb:NM_033127.1
1552882_a_at	145.5	A	28.4	A	42.6	A	13	A	39	A	8.7	A	50.5	A	59.8	A	85.9	A	31.2	A	82.9	A	49.4	A	gb:NM_152424.1 /DB_XREF=gi:22748896 /TID=Hs2.314225.1 /CNT=4 /FEA=FLmRNA /TIER=FL /STK=2 /LL=139285 /UG_GENE=FLJ39827 /UG=Hs.314225 /UG_TITLE=hypothetical protein FLJ39827 /DEF=Homo sapiens hypothetical protein FLJ39827 (FLJ39827), mRNA. /FL=gb:NM_152424.1
1552884_at	186.4	A	138.6	A	74.7	A	142.6	A	32	A	71.1	A	251.7	A	137.8	A	108.2	A	125.3	A	139.9	A	175.2	A	gb:NM_152568.1 /DB_XREF=gi:22749178 /TID=Hs2.232341.1 /CNT=4 /FEA=FLmRNA /TIER=FL /STK=2 /LL=157848 /UG_GENE=FLJ25169 /UG=Hs.232341 /UG_TITLE=hypothetical protein FLJ25169 /DEF=Homo sapiens hypothetical protein FLJ25169 (FLJ25169), mRNA. /FL=gb:NM_152568.1
1552885_a_at	91.1	A	253.1	A	168.6	A	146.1	A	104.8	A	509	A	137.8	A	203.6	A	66.1	A	205.9	A	79.9	A	65.7	A	gb:NM_152568.1 /DB_XREF=gi:22749178 /TID=Hs2.232341.1 /CNT=4 /FEA=FLmRNA /TIER=FL /STK=2 /LL=157848 /UG_GENE=FLJ25169 /UG=Hs.232341 /UG_TITLE=hypothetical protein FLJ25169 /DEF=Homo sapiens hypothetical protein FLJ25169 (FLJ25169), mRNA. /FL=gb:NM_152568.1
1552887_at	135.8	A	119	A	117.8	A	80.2	A	250.2	P	140.1	P	378.7	A	60.9	A	269.5	A	210.6	P	139.7	A	215.6	P	gb:NM_152710.1 /DB_XREF=gi:22749412 /TID=Hs2.131194.1 /CNT=4 /FEA=FLmRNA /TIER=FL /STK=2 /LL=219793 /UG_GENE=FLJ32820 /UG=Hs.131194 /UG_TITLE=hypothetical protein FLJ32820 /DEF=Homo sapiens hypothetical protein FLJ32820 (FLJ32820), mRNA. /FL=gb:NM_152710.1
1552889_a_at	881.1	A	713.8	P	452.3	M	265.7	A	514.4	A	438.6	A	739.5	A	462.9	M	757.4	P	622.5	M	735.8	P	464.4	M	gb:NM_138568.1 /DB_XREF=gi:20070371 /TID=Hs2.337557.1 /CNT=4 /FEA=FLmRNA /TIER=FL /STK=2 /LL=90332 /UG_GENE=MGC16332 /UG=Hs.337557 /UG_TITLE=hypothetical protein MGC16332 /DEF=Homo sapiens hypothetical protein MGC16332 (MGC16332), mRNA. /FL=gb:NM_138568.1 gb:BC009217.1
1552890_a_at	49.4	A	37.2	A	7.3	A	18.4	A	16.3	A	15.7	A	90.8	A	29.7	A	11.8	A	33.2	A	83.1	A	76.7	A	gb:NM_145200.1 /DB_XREF=gi:21624640 /GEN=CABP4 /TID=Hs2.143036.1 /CNT=4 /FEA=FLmRNA /TIER=FL /STK=2 /LL=57010 /UG=Hs.143036 /DEF=Homo sapiens calcium binding protein 4 (CABP4), mRNA. /PROD=calcium binding protein 4 /FL=gb:NM_145200.1 gb:AY039217.1
1552892_at	41.6	A	42.8	A	36	A	38.1	A	30.6	A	93.2	A	52.4	A	29.5	A	36.1	A	36.3	A	40.8	A	39.6	A	gb:NM_052945.2 /DB_XREF=gi:17978517 /GEN=TNFRSF13C /TID=Hs2.344088.1 /CNT=4 /FEA=FLmRNA /TIER=FL /STK=2 /LL=115650 /UG=Hs.344088 /DEF=Homo sapiens tumor necrosis factor receptor superfamily, member 13C (TNFRSF13C), mRNA. /PROD=BAFF receptor /FL=gb:AF373846.1 gb:NM_052945.2
1552893_at	349	P	234.3	P	226.4	A	302	A	322.2	A	311.8	M	331.4	A	261	A	379.3	P	213.2	A	163.5	A	429.2	A	gb:NM_033259.1 /DB_XREF=gi:15147233 /GEN=CAM-KIIN /TID=Hs2.343882.1 /CNT=4 /FEA=FLmRNA /TIER=FL /STK=2 /LL=94032 /UG=Hs.343882 /DEF=Homo sapiens CaM-KII inhibitory protein (CAM-KIIN), mRNA. /PROD=CaM-KII inhibitory protein /FL=gb:NM_033259.1
1552895_a_at	78.6	A	63.9	A	5.4	A	5	A	87.2	P	163.9	P	9.7	A	0.9	A	107.5	P	62.5	P	64.2	A	79	P	gb:NM_153773.1 /DB_XREF=gi:24415991 /TID=Hs2.125699.1 /CNT=6 /FEA=FLmRNA /TIER=FL /STK=2 /LL=149992 /UG_GENE=C21orf99 /UG=Hs.125699 /UG_TITLE=chromosome 21 open reading frame 99 /DEF=Homo sapiens chromosome 21 open reading frame 99 (C21orf99), mRNA. /FL=gb:NM_153773.1 gb:AF427490.1
1552897_a_at	81.8	A	21	A	34.7	A	52.5	A	30.4	A	47.4	A	222.5	P	135.1	P	135.7	P	133.6	P	120	P	196.8	P	gb:NM_133329.4 /DB_XREF=gi:27436991 /GEN=KCNG3 /TID=Hs2.352633.1 /CNT=5 /FEA=FLmRNA /TIER=FL /STK=2 /LL=170850 /UG=Hs.352633 /DEF=Homo sapiens potassium voltage-gated channel, subfamily G, member 3 (KCNG3), transcript variant 1, mRNA. /PROD=potassium voltage-gated channel, subfamily G,member 3 isoform 1 /FL=gb:AF454548.1 gb:AF348982.1 gb:AB070604.1 gb:NM_133329.4
1552898_a_at	20	A	3.3	A	8.3	A	7.9	A	35.4	A	38.5	A	73.9	A	23.6	A	29.6	A	19.4	A	75.1	A	72.5	A	gb:AF348982.1 /DB_XREF=gi:19070536 /TID=Hs2.352633.1 /CNT=5 /FEA=FLmRNA /TIER=FL /STK=1 /LL=170850 /UG_GENE=KCNG3 /UG=Hs.352633 /DEF=Homo sapiens voltage-gated potassium channel Kv10.1 mRNA, complete cds. /PROD=voltage-gated potassium channel Kv10.1 /FL=gb:AF454548.1 gb:AF348982.1 gb:AB070604.1 gb:NM_133329.4
1552899_at	95.7	A	109.4	P	69.9	M	22.4	A	95.7	P	150.9	A	251.2	P	26.1	A	103.4	A	105.3	P	139.2	P	153.5	P	gb:NM_153224.1 /DB_XREF=gi:23397484 /TID=Hs2.126165.1 /CNT=5 /FEA=FLmRNA /TIER=FL /STK=2 /LL=154089 /UG_GENE=MGC34034 /UG=Hs.126165 /UG_TITLE=hypothetical protein MGC34034 /DEF=Homo sapiens hypothetical protein MGC34034 (MGC34034), mRNA. /FL=gb:BC032958.1 gb:NM_153224.1
1552900_a_at	150.3	P	93.4	A	20.8	A	39.1	A	167.3	P	35.8	A	131.4	A	64.2	P	75.9	P	37.7	A	129.2	P	108.7	P	gb:NM_153224.1 /DB_XREF=gi:23397484 /TID=Hs2.126165.1 /CNT=5 /FEA=FLmRNA /TIER=FL /STK=2 /LL=154089 /UG_GENE=MGC34034 /UG=Hs.126165 /UG_TITLE=hypothetical protein MGC34034 /DEF=Homo sapiens hypothetical protein MGC34034 (MGC34034), mRNA. /FL=gb:BC032958.1 gb:NM_153224.1
1552902_a_at	26.2	A	31.8	A	24.3	A	18.8	A	317.9	A	29.3	A	110	A	21.1	A	161.9	A	12.7	A	13.5	A	24.1	A	gb:NM_148898.1 /DB_XREF=gi:22538410 /GEN=FOXP2 /TID=Hs2.282787.1 /CNT=5 /FEA=FLmRNA /TIER=FL /STK=2 /LL=93986 /UG=Hs.282787 /DEF=Homo sapiens forkhead box P2 (FOXP2), transcript variant 2, mRNA. /PROD=forkhead box P2 isoform II /FL=gb:NM_148899.1 gb:NM_148898.1 gb:AY144615.1
1552903_at	32.4	A	148.4	A	25.9	A	174.7	A	95.7	A	112.9	A	83.7	A	44.3	A	213.5	A	124.9	A	12.8	A	70.2	A	gb:NM_153446.1 /DB_XREF=gi:23592223 /GEN=GALGT2 /TID=Hs2.374679.1 /CNT=5 /FEA=FLmRNA /TIER=FL /STK=2 /LL=124872 /UG=Hs.374679 /DEF=Homo sapiens beta 1,4 N-acetylgalactosaminyltransferase (GALGT2), mRNA. /PROD=beta 1,4 N-acetylgalactosaminyltransferase /FL=gb:NM_153446.1 gb:AF510036.1
1552904_at	51.4	A	18.9	A	17.4	A	12.6	A	34.6	A	3.4	A	7.3	A	34.6	A	78.4	A	45.3	P	2.4	A	2.7	A	gb:NM_138999.1 /DB_XREF=gi:20452469 /GEN=NETO1 /TID=Hs2.60563.2 /CNT=5 /FEA=FLmRNA /TIER=FL /STK=2 /LL=81832 /UG=Hs.60563 /DEF=Homo sapiens neuropilin (NRP) and tolloid (TLL)-like 1 (NETO1), transcript variant 1, mRNA. /PROD=neuropilin- and tolloid-like protein 1 isoform 1precursor /FL=gb:NM_138999.1 gb:AF448839.1
1552906_at	26.3	A	3.7	A	2.3	A	40.7	A	12.3	A	54.5	A	110.9	A	33	A	1.3	A	35.9	A	39.8	A	32.1	A	gb:NM_152578.1 /DB_XREF=gi:22749198 /TID=Hs2.375082.1 /CNT=5 /FEA=FLmRNA /TIER=FL /STK=2 /LL=158521 /UG_GENE=FLJ25736 /UG=Hs.375082 /UG_TITLE=hypothetical protein FLJ25736 /DEF=Homo sapiens hypothetical protein FLJ25736 (FLJ25736), mRNA. /FL=gb:NM_152578.1 gb:BC034320.1
1552908_at	37.8	A	14.1	A	3.4	A	15.4	A	5.3	A	9	A	162.2	A	13	A	8.4	A	22.7	A	6.8	A	4.4	A	gb:NM_145278.1 /DB_XREF=gi:21687148 /TID=Hs2.352641.1 /CNT=5 /FEA=FLmRNA /TIER=FL /STK=2 /LL=148823 /UG_GENE=LOC148823 /UG=Hs.352641 /UG_TITLE=LOC148823 /DEF=Homo sapiens LOC148823 (LOC148823), mRNA. /FL=gb:BC024174.1 gb:NM_145278.1
1552910_at	7.8	A	69.8	A	14.9	A	34.7	A	15.8	A	18.6	A	27.1	A	89	A	34.2	A	77.9	A	123.5	A	23.2	A	gb:NM_052884.1 /DB_XREF=gi:16418392 /GEN=SIGLEC11 /TID=Hs2.269347.1 /CNT=4 /FEA=FLmRNA /TIER=FL /STK=2 /LL=114132 /UG=Hs.269347 /DEF=Homo sapiens sialic acid binding Ig-like lectin 11 (SIGLEC11), mRNA. /PROD=sialic acid binding Ig-like lectin 11 /FL=gb:NM_052884.1 gb:AB072038.1 gb:AF337818.1
1552911_at	82.5	A	9.7	A	13.4	A	9.3	A	11.2	A	9.2	A	49.1	A	56	A	12.7	A	6.3	A	16.2	A	12.1	A	gb:AB072038.1 /DB_XREF=gi:19716085 /GEN=Siglec-12 /TID=Hs2.269347.1 /CNT=4 /FEA=FLmRNA /TIER=FL /STK=1 /LL=114132 /UG=Hs.269347 /DEF=Homo sapiens mRNA for Sialic acid-binding Ig-like lectin Siglec-12, complete cds. /PROD=Sialic acid-binding Ig-like lectin Siglec-12 /FL=gb:NM_052884.1 gb:AB072038.1 gb:AF337818.1
1552912_a_at	34.6	A	56.6	A	23.7	A	8.2	A	16.2	A	14.1	A	66.1	A	5.2	A	4	A	11.2	A	47	A	11	A	gb:NM_144701.2 /DB_XREF=gi:24430211 /GEN=IL23R /TID=Hs2.375184.1 /CNT=4 /FEA=FLmRNA /TIER=FL /STK=2 /LL=149233 /UG=Hs.375184 /DEF=Homo sapiens interleukin-23 receptor (IL23R), mRNA. /PROD=interleukin-23 receptor precursor /FL=gb:NM_144701.2 gb:AF461422.1
1552913_at	1.4	A	5.1	A	1.3	A	0.6	A	36.9	A	2.9	A	13.9	A	3.6	A	1.5	A	2.5	A	14.8	A	15.4	A	gb:NM_173699.1 /DB_XREF=gi:27734780 /TID=Hs2.350683.1 /CNT=4 /FEA=FLmRNA /TIER=FL /STK=2 /LL=286514 /UG_GENE=MGC33889 /UG=Hs.350683 /UG_TITLE=hypothetical protein MGC33889 /DEF=Homo sapiens hypothetical protein MGC33889 (MGC33889), mRNA. /FL=gb:BC029525.1 gb:NM_173699.1
1552914_a_at	718.6	A	272.8	A	334	A	60.9	A	117	A	94.4	A	52.1	A	229.9	A	277.5	A	424.2	A	287.8	A	90	A	gb:NM_025240.1 /DB_XREF=gi:13376851 /GEN=B7-H3 /TID=Hs2.77873.1 /CNT=4 /FEA=FLmRNA /TIER=FL /STK=2 /LL=80381 /UG=Hs.77873 /DEF=Homo sapiens B7 homolog 3 (B7-H3), mRNA. /PROD=B7 homolog 3 /FL=gb:AF302102.1 gb:NM_025240.1
1552915_at	139.6	A	199.8	P	96.6	A	80.2	A	37.5	A	116.4	A	107.4	A	70.3	P	159.3	M	128.3	A	124.8	A	127.7	A	gb:NM_172138.1 /DB_XREF=gi:26024320 /GEN=IL28A /TID=Hs2.406743.1 /CNT=4 /FEA=FLmRNA /TIER=FL /STK=2 /LL=282616 /UG=Hs.406743 /DEF=Homo sapiens interleukin 28A (interferon, lambda 2) (IL28A), mRNA. /PROD=interleukin 28A /FL=gb:NM_172138.1 gb:AY129148.1 gb:AY184373.1
1552917_at	115.5	A	129.1	A	42.9	A	69.7	A	148.5	A	154.6	M	212.3	A	124.2	A	63.5	A	95.5	A	182.6	A	131.1	A	gb:NM_172140.1 /DB_XREF=gi:26024324 /GEN=IL29 /TID=Hs2.406745.1 /CNT=4 /FEA=FLmRNA /TIER=FL /STK=2 /LL=282618 /UG=Hs.406745 /DEF=Homo sapiens interleukin 29 (interferon, lambda 1) (IL29), mRNA. /PROD=interleukin 29 /FL=gb:NM_172140.1 gb:AY184372.1 gb:AY129150.1
1552919_at	4.8	A	74.1	A	31.6	P	9.6	A	20.7	A	4.5	A	28	A	9.9	A	12.5	A	35.6	A	47	A	67.9	A	gb:NM_144645.1 /DB_XREF=gi:21389478 /TID=Hs2.187780.1 /CNT=4 /FEA=FLmRNA /TIER=FL /STK=2 /LL=132989 /UG_GENE=MGC26744 /UG=Hs.187780 /UG_TITLE=hypothetical protein MGC26744 /DEF=Homo sapiens hypothetical protein MGC26744 (MGC26744), mRNA. /FL=gb:BC016746.1 gb:NM_144645.1
1552921_a_at	552.6	P	580.6	P	312.5	P	577.2	P	457	P	275.2	P	58.4	A	1209.1	P	1680.3	P	726.7	P	1171.7	P	1211.5	P	gb:NM_022116.1 /DB_XREF=gi:11545832 /GEN=FIGNL1 /TID=Hs2.137516.1 /CNT=4 /FEA=FLmRNA /TIER=FL /STK=2 /LL=63979 /UG=Hs.137516 /DEF=Homo sapiens fidgetin-like 1 (FIGNL1), mRNA. /PROD=fidgetin-like 1 /FL=gb:NM_022116.1
1552922_at	21	A	11.5	A	38	A	2.1	A	9.2	A	4.1	A	37.7	A	9.7	A	4.7	A	3.8	A	5	A	5.6	A	gb:NM_014989.1 /DB_XREF=gi:24307976 /GEN=RIMS1 /TID=Hs2.302136.1 /CNT=3 /FEA=FLmRNA /TIER=FL /STK=2 /LL=22999 /UG=Hs.302136 /DEF=Homo sapiens regulating synaptic membrane exocytosis 1 (RIMS1), mRNA. /PROD=regulating synaptic membrane exocytosis 1 /FL=gb:AB045726.1 gb:NM_014989.1
1552923_a_at	172.7	A	193.8	A	43	A	273.4	A	345.3	A	84.5	A	333.8	A	27.2	A	307.4	A	366.2	A	218.1	A	157.6	A	gb:NM_020845.1 /DB_XREF=gi:24308236 /GEN=NIR3 /TID=Hs2.272759.1 /CNT=3 /FEA=FLmRNA /TIER=FL /STK=2 /LL=57605 /UG=Hs.272759 /DEF=Homo sapiens PYK2 N-terminal domain-interacting receptor 3 (NIR3), mRNA. /PROD=PYK2 N-terminal domain-interacting receptor 3 /FL=gb:NM_020845.1 gb:AF334585.1
1552924_a_at	60.2	A	54.8	A	22.6	A	471.6	A	657.8	A	318.6	A	604.9	A	48.6	A	445.8	A	561	P	184.9	A	230.7	A	gb:AL133612.1 /DB_XREF=gi:6599223 /TID=Hs2.272759.1 /CNT=3 /FEA=FLmRNA /TIER=ConsEnd /STK=0 /LL=57605 /UG_GENE=NIR3 /UG=Hs.272759 /UG_TITLE=PYK2 N-terminal domain-interacting receptor 3 /DEF=Homo sapiens mRNA; cDNA DKFZp434P0917 (from clone DKFZp434P0917); partial cds. /FL=gb:NM_020845.1 gb:AF334585.1
1552925_at	27.6	A	18.1	A	10.9	A	7.9	A	59.6	A	14.7	A	30.6	A	16.7	A	17.7	A	31	A	109.7	A	73.1	A	gb:NM_020815.1 /DB_XREF=gi:14589913 /GEN=PCDH10 /TID=Hs2.146858.2 /CNT=3 /FEA=FLmRNA /TIER=FL /STK=2 /LL=57575 /UG=Hs.146858 /DEF=Homo sapiens protocadherin 10 (PCDH10), transcript variant 2, mRNA. /PROD=protocadherin 10, isoform 2 precursor /FL=gb:AY013874.1 gb:NM_020815.1
1552927_at	263.9	P	322.5	P	192.7	P	86.5	P	73.9	P	153.6	P	168.5	P	26.9	A	108.6	M	134.3	P	263.9	P	16.1	A	gb:NM_152787.1 /DB_XREF=gi:22749540 /TID=Hs2.365565.1 /CNT=3 /FEA=FLmRNA /TIER=FL /STK=2 /LL=257397 /UG_GENE=MGC45404 /UG=Hs.365565 /UG_TITLE=hypothetical protein MGC45404 /DEF=Homo sapiens hypothetical protein MGC45404 (MGC45404), mRNA. /FL=gb:BC032526.1 gb:NM_152787.1
1552928_s_at	330.3	P	390.6	P	390.6	P	220.7	P	221.6	P	397.7	P	225.8	A	146	P	161.1	P	367.3	P	311.3	P	32	A	gb:NM_152787.1 /DB_XREF=gi:22749540 /TID=Hs2.365565.1 /CNT=3 /FEA=FLmRNA /TIER=FL /STK=2 /LL=257397 /UG_GENE=MGC45404 /UG=Hs.365565 /UG_TITLE=hypothetical protein MGC45404 /DEF=Homo sapiens hypothetical protein MGC45404 (MGC45404), mRNA. /FL=gb:BC032526.1 gb:NM_152787.1
1552929_at	41.1	A	2.6	A	9.6	A	1.6	A	4.9	A	6.6	A	102.2	A	2.9	A	26.1	A	2.3	A	17.6	A	5	A	gb:NM_139209.1 /DB_XREF=gi:21166358 /GEN=GPRK7 /TID=Hs2.351818.1 /CNT=3 /FEA=FLmRNA /TIER=FL /STK=2 /LL=131890 /UG=Hs.351818 /DEF=Homo sapiens G protein-coupled receptor kinase 7 (GPRK7), mRNA. /PROD=G-protein-coupled receptor kinase 7 /FL=gb:AF282269.1 gb:AF439409.1 gb:NM_139209.1
1552930_at	229.2	P	379.9	P	203.7	P	137.2	P	228.7	A	215.5	P	366.2	P	173.6	P	208	P	255.4	P	199.8	P	183.2	P	gb:NM_033467.1 /DB_XREF=gi:15991812 /GEN=MMEL2 /TID=Hs2.380483.1 /CNT=3 /FEA=FLmRNA /TIER=FL /STK=2 /LL=79258 /UG=Hs.380483 /DEF=Homo sapiens membrane metallo-endopeptidase-like 2 (MMEL2), mRNA. /PROD=membrane metallo-endopeptidase-like 2 /FL=gb:AF336981.1 gb:NM_033467.1
1552931_a_at	999.3	P	997.5	P	814.7	P	537.2	P	1533.1	P	567.2	P	600.4	A	919	P	493.9	A	437.3	M	1059.1	P	377	M	gb:NM_002605.1 /DB_XREF=gi:27734720 /GEN=PDE8A /TID=Hs2.78746.1 /CNT=3 /FEA=FLmRNA /TIER=FL /STK=2 /LL=5151 /UG=Hs.78746 /DEF=Homo sapiens phosphodiesterase 8A (PDE8A), transcript variant 1, mRNA. /PROD=phosphodiesterase 8A isoform 1 /FL=gb:AF388183.1 gb:NM_002605.1 gb:AF332653.1
1552932_at	22	A	86	A	15.4	A	10.4	A	12	A	72.1	A	39.9	A	10.5	A	8.4	A	20.4	A	9.4	A	5.1	A	gb:NM_138329.1 /DB_XREF=gi:21264319 /GEN=PYPAF5 /TID=Hs2.352611.1 /CNT=3 /FEA=FLmRNA /TIER=FL /STK=2 /LL=171389 /UG=Hs.352611 /DEF=Homo sapiens PYRIN-containing APAF1-like protein 5 (PYPAF5), mRNA. /PROD=PYRIN-containing APAF1-like protein 5 /FL=gb:NM_138329.1 gb:AF479748.1
1552933_at	13.1	A	53.2	A	5.5	A	24.8	A	42.8	A	71.9	A	122	A	6.9	A	146.8	A	44.9	A	149.4	A	77.1	A	gb:NM_152763.1 /DB_XREF=gi:22749500 /TID=Hs2.229829.1 /CNT=3 /FEA=FLmRNA /TIER=FL /STK=2 /LL=254268 /UG_GENE=MGC26989 /UG=Hs.229829 /UG_TITLE=hypothetical protein MGC26989 /DEF=Homo sapiens hypothetical protein MGC26989 (MGC26989), mRNA. /FL=gb:BC030647.1 gb:NM_152763.1
1552935_at	202	A	166.9	A	88.1	A	166.9	A	150.2	A	109.6	A	302.1	A	139.7	A	228.4	A	199.8	A	281.4	A	213.9	A	gb:NM_152694.1 /DB_XREF=gi:22749386 /TID=Hs2.134873.1 /CNT=3 /FEA=FLmRNA /TIER=FL /STK=2 /LL=203430 /UG_GENE=FLJ38865 /UG=Hs.134873 /UG_TITLE=hypothetical protein FLJ38865 /DEF=Homo sapiens hypothetical protein FLJ38865 (FLJ38865), mRNA. /FL=gb:NM_152694.1
1552937_s_at	405.6	A	326.1	A	310.2	A	658	P	523.2	P	415.7	A	43.4	A	453.8	A	567.1	M	496	A	259.1	A	698.9	P	gb:NM_130384.1 /DB_XREF=gi:18390346 /GEN=TREX1 /TID=Hs2.278408.4 /CNT=3 /FEA=FLmRNA /TIER=FL /STK=2 /LL=11277 /UG=Hs.278408 /DEF=Homo sapiens three prime repair exonuclease 1 (TREX1), transcript variant 6, mRNA. /PROD=three prime repair exonuclease 1, isoform d /FL=gb:AF451323.1 gb:NM_130384.1
1552938_at	87.8	A	53.3	A	14.8	A	99.4	A	85.1	A	37.8	A	79.7	A	70	A	25.6	A	74.9	A	13.2	A	14.6	A	gb:NM_033132.2 /DB_XREF=gi:22547202 /GEN=ZIC5 /TID=Hs2.282139.1 /CNT=3 /FEA=FLmRNA /TIER=FL /STK=2 /LL=85416 /UG=Hs.282139 /DEF=Homo sapiens Zic family member 5 (odd-paired homolog, Drosophila) (ZIC5), mRNA. /PROD=zinc finger protein of the cerebellum 5 /FL=gb:NM_033132.2 gb:AF378304.1
1552939_at	2	A	1.3	A	6.9	A	1.1	A	47	P	59.8	A	37.4	A	2.5	A	42.5	A	2.4	A	16	A	29.3	A	gb:NM_139290.1 /DB_XREF=gi:21328450 /GEN=ANGPT1 /TID=Hs2.2463.2 /CNT=3 /FEA=FLmRNA /TIER=FL /STK=2 /LL=284 /UG=Hs.2463 /DEF=Homo sapiens angiopoietin 1 (ANGPT1), transcript variant 2, mRNA. /PROD=angiopoietin 1 isoform b /FL=gb:NM_139290.1 gb:BC029406.1
1552940_at	342.2	A	317.9	A	226.5	A	2.6	A	20.3	A	34.6	A	57.7	A	168.6	A	58.3	A	4.1	A	377.3	A	4.7	A	gb:NM_172000.1 /DB_XREF=gi:25188188 /TID=Hs2.156977.1 /CNT=3 /FEA=FLmRNA /TIER=FL /STK=2 /LL=127670 /UG_GENE=HE9 /UG=Hs.156977 /UG_TITLE=putative membrane protein HE9 /DEF=Homo sapiens putative membrane protein HE9 (HE9), mRNA. /FL=gb:NM_172000.1
1552942_at	453.3	P	396.4	P	343.6	P	264.4	P	304	P	495.5	P	736.7	P	256.2	P	394.9	P	381.4	P	315.3	P	425	P	gb:NM_153009.1 /DB_XREF=gi:23308530 /TID=Hs2.350904.1 /CNT=3 /FEA=FLmRNA /TIER=FL /STK=2 /LL=149373 /UG_GENE=FLJ30430 /UG=Hs.350904 /UG_TITLE=hypothetical protein FLJ30430 /DEF=Homo sapiens hypothetical protein FLJ30430 (FLJ30430), mRNA. /FL=gb:NM_153009.1
1552943_at	2.1	A	41.2	A	6.5	A	96.4	P	53.9	A	4.9	A	126.9	A	3.5	A	69.1	A	6.1	A	13.6	A	37.3	A	gb:NM_173536.1 /DB_XREF=gi:27734922 /TID=Hs2.375051.1 /CNT=3 /FEA=FLmRNA /TIER=FL /STK=2 /LL=166765 /UG_GENE=LOC166765 /UG=Hs.375051 /UG_TITLE=hypothetical protein LOC166765 /DEF=Homo sapiens hypothetical protein LOC166765 (LOC166765), mRNA. /FL=gb:NM_173536.1 gb:BC031087.1
1552944_a_at	438.8	A	54.5	A	694.2	A	43.8	A	102.3	A	91.8	A	186.7	A	152.4	A	62.2	A	102.6	A	269.8	A	368.8	A	gb:NM_052839.1 /DB_XREF=gi:16418340 /GEN=PANX2 /TID=Hs2.343259.1 /CNT=3 /FEA=FLmRNA /TIER=FL /STK=2 /LL=56666 /UG=Hs.343259 /DEF=Homo sapiens pannexin 2 (PANX2), mRNA. /PROD=pannexin 2 /FL=gb:NM_052839.1 gb:AF398510.1
1552946_at	120.4	P	118.5	P	11.6	A	34.4	P	204.3	P	4	A	157.5	A	62.1	A	108.9	A	46.7	A	122	P	4.1	A	gb:NM_153608.1 /DB_XREF=gi:23957699 /TID=Hs2.375812.1 /CNT=3 /FEA=FLmRNA /TIER=FL /STK=2 /LL=163071 /UG_GENE=MGC17986 /UG=Hs.375812 /UG_TITLE=hypothetical protein MGC17986 /DEF=Homo sapiens hypothetical protein MGC17986 (MGC17986), mRNA. /FL=gb:NM_153608.1
1552947_x_at	141.6	M	164.8	P	49.4	A	50.9	A	243	A	90.9	A	182.7	A	174.5	P	127.5	P	43.3	A	121.2	A	94.8	A	gb:NM_153608.1 /DB_XREF=gi:23957699 /TID=Hs2.375812.1 /CNT=3 /FEA=FLmRNA /TIER=FL /STK=2 /LL=163071 /UG_GENE=MGC17986 /UG=Hs.375812 /UG_TITLE=hypothetical protein MGC17986 /DEF=Homo sapiens hypothetical protein MGC17986 (MGC17986), mRNA. /FL=gb:NM_153608.1
1552948_at	7.2	A	7.7	A	6.9	A	5.1	A	9.9	A	14.9	A	44.2	A	11.9	A	9.5	A	7.7	A	6.9	A	13.6	A	gb:NM_152492.1 /DB_XREF=gi:22749024 /TID=Hs2.125919.1 /CNT=3 /FEA=FLmRNA /TIER=FL /STK=2 /LL=148870 /UG_GENE=FLJ32825 /UG=Hs.125919 /UG_TITLE=hypothetical protein FLJ32825 /DEF=Homo sapiens hypothetical protein FLJ32825 (FLJ32825), mRNA. /FL=gb:NM_152492.1
1552950_at	36.7	A	36.5	A	3.8	A	9	A	9	A	9.6	A	21.5	A	6.3	A	7.4	A	47.7	A	84.8	A	12.9	A	gb:NM_173528.1 /DB_XREF=gi:27734946 /TID=Hs2.130979.1 /CNT=3 /FEA=FLmRNA /TIER=FL /STK=2 /LL=161502 /UG_GENE=FLJ38615 /UG=Hs.130979 /UG_TITLE=hypothetical protein FLJ38615 /DEF=Homo sapiens hypothetical protein FLJ38615 (FLJ38615), mRNA. /FL=gb:NM_173528.1
1552952_at	48.6	A	43.4	A	92.6	A	45.5	A	59.7	A	65.6	A	64.9	A	71.9	A	101.7	A	94.8	A	142.7	P	72.9	P	gb:NM_144971.1 /DB_XREF=gi:21699055 /TID=Hs2.302072.1 /CNT=3 /FEA=FLmRNA /TIER=FL /STK=2 /LL=159162 /UG_GENE=MGC26641 /UG=Hs.302072 /UG_TITLE=hypothetical protein MGC26641 /DEF=Homo sapiens hypothetical protein MGC26641 (MGC26641), mRNA. /FL=gb:NM_144971.1 gb:BC026077.1
1552953_a_at	149.8	A	105.2	A	88.7	A	13.4	A	80	A	96.6	A	221.2	A	85.3	A	41.6	A	57.7	A	63.3	A	83.6	A	gb:NM_006160.2 /DB_XREF=gi:21314637 /GEN=NEUROD2 /TID=Hs2.322431.1 /CNT=3 /FEA=FLmRNA /TIER=FL /STK=2 /LL=4761 /UG=Hs.322431 /DEF=Homo sapiens neurogenic differentiation 2 (NEUROD2), mRNA. /PROD=neurogenic differentiation 2 /FL=gb:BC022481.1 gb:NM_006160.2
1552954_at	36.9	A	108.9	A	10.4	A	36.9	A	54.1	A	11.1	A	18.2	A	66.5	A	18.9	A	19.8	A	89.4	A	110.1	A	gb:NM_173668.1 /DB_XREF=gi:27734704 /TID=Hs2.363881.1 /CNT=3 /FEA=FLmRNA /TIER=FL /STK=2 /LL=285685 /UG_GENE=FLJ34836 /UG=Hs.363881 /UG_TITLE=hypothetical protein FLJ34836 /DEF=Homo sapiens hypothetical protein FLJ34836 (FLJ34836), mRNA. /FL=gb:NM_173668.1
1552955_at	88.1	A	210.2	A	8.4	A	19.8	A	116.7	A	6	A	46.2	A	60.8	A	193.9	A	174	A	143.1	A	58.8	A	gb:NM_054029.1 /DB_XREF=gi:16876448 /TID=Hs2.145579.1 /CNT=3 /FEA=FLmRNA /TIER=FL /STK=2 /LL=83655 /UG_GENE=C8orf14 /UG=Hs.145579 /UG_TITLE=chromosome 8 open reading frame 14 /DEF=Homo sapiens chromosome 8 open reading frame 14 (C8orf14), mRNA. /FL=gb:NM_054029.1
1552957_at	12.7	A	23.4	A	4.3	A	3.5	A	48.2	A	9.7	A	37.9	A	2.4	A	74.9	A	9.2	A	22.3	A	52.3	A	gb:NM_145299.1 /DB_XREF=gi:21686978 /TID=Hs2.348624.1 /CNT=3 /FEA=FLmRNA /TIER=FL /STK=2 /LL=200383 /UG_GENE=LOC200383 /UG=Hs.348624 /UG_TITLE=similar to Dynein heavy chain at 16F /DEF=Homo sapiens similar to Dynein heavy chain at 16F (LOC200383), mRNA. /FL=gb:NM_145299.1 gb:BC015442.1
1552960_at	19.7	A	29.2	A	11.1	A	16.1	A	18.1	A	20.3	A	36.7	A	13	A	16.5	A	16.3	A	11.4	A	49	A	gb:NM_130830.1 /DB_XREF=gi:18677766 /TID=Hs2.352644.1 /CNT=3 /FEA=FLmRNA /TIER=FL /STK=2 /LL=131578 /UG_GENE=LIB /UG=Hs.352644 /UG_TITLE=leucine-rich repeat protein induced by beta amyloid /DEF=Homo sapiens leucine-rich repeat protein induced by beta amyloid (LIB), mRNA. /FL=gb:NM_130830.1 gb:AB071037.1
1552961_at	11.8	A	17.3	A	19.5	A	6.6	A	75.1	A	41.2	A	31.4	A	56.5	A	12.8	A	12.9	A	23.6	A	41.9	A	gb:NM_032908.1 /DB_XREF=gi:14249683 /TID=Hs2.334527.1 /CNT=3 /FEA=FLmRNA /TIER=FL /STK=2 /LL=84994 /UG_GENE=MGC14407 /UG=Hs.334527 /UG_TITLE=hypothetical protein MGC14407 /DEF=Homo sapiens hypothetical protein MGC14407 (MGC14407), mRNA. /FL=gb:NM_032908.1 gb:BC007917.1
1552964_at	18.8	A	35.5	A	25.4	A	25.9	A	30.1	A	18.6	A	33.4	A	16.7	A	16.1	A	15.6	A	19.1	A	23.8	A	gb:NM_173572.1 /DB_XREF=gi:27734836 /TID=Hs2.375837.1 /CNT=3 /FEA=FLmRNA /TIER=FL /STK=2 /LL=255352 /UG_GENE=FLJ25954 /UG=Hs.375837 /UG_TITLE=hypothetical protein FLJ25954 /DEF=Homo sapiens hypothetical protein FLJ25954 (FLJ25954), mRNA. /FL=gb:NM_173572.1
1552965_a_at	17.9	A	109.7	A	45.8	A	23.1	A	6.4	A	28.2	A	71.8	A	15.8	A	130.9	A	21.3	A	24.7	A	5.7	A	gb:NM_145236.1 /DB_XREF=gi:21687138 /GEN=B3GNT7 /TID=Hs2.299329.1 /CNT=3 /FEA=FLmRNA /TIER=FL /STK=2 /LL=93010 /UG=Hs.299329 /DEF=Homo sapiens UDP-GlcNAc:betaGal beta-1,3-N-acetylglucosaminyltransferase 7 (B3GNT7), mRNA. /PROD=UDP-GlcNAc:betaGalbeta-1,3-N-acetylglucosaminyltransferase 7 /FL=gb:AF502430.1 gb:NM_145236.1
1552967_at	194.3	P	206.1	P	95.2	A	90.6	A	95	A	36.9	A	208	P	96.5	A	187.3	M	184.6	A	167.8	P	167.2	A	gb:NM_152577.1 /DB_XREF=gi:22749188 /TID=Hs2.132485.1 /CNT=3 /FEA=FLmRNA /TIER=FL /STK=2 /LL=158506 /UG_GENE=FLJ25735 /UG=Hs.132485 /UG_TITLE=hypothetical protein FLJ25735 /DEF=Homo sapiens hypothetical protein FLJ25735 (FLJ25735), mRNA. /FL=gb:NM_152577.1
1552969_a_at	215.5	P	159.8	A	95.8	A	79.7	P	90.6	A	168.5	P	218.3	A	52.7	A	112.2	A	14	A	157	A	59.9	A	gb:NM_145310.1 /DB_XREF=gi:21945060 /GEN=ZNF258 /TID=Hs2.409166.2 /CNT=3 /FEA=FLmRNA /TIER=FL /STK=2 /LL=9204 /UG=Hs.409166 /DEF=Homo sapiens zinc finger protein 258 (ZNF258), mRNA. /PROD=zinc finger protein 258 /FL=gb:NM_145310.1 gb:BC007070.1
1552970_s_at	177	P	172.4	P	182.4	P	95.7	P	246.6	P	228.6	P	236.8	M	55.6	P	113.2	M	74.6	A	183.3	P	67.5	A	gb:NM_145310.1 /DB_XREF=gi:21945060 /GEN=ZNF258 /TID=Hs2.409166.2 /CNT=3 /FEA=FLmRNA /TIER=FL /STK=2 /LL=9204 /UG=Hs.409166 /DEF=Homo sapiens zinc finger protein 258 (ZNF258), mRNA. /PROD=zinc finger protein 258 /FL=gb:NM_145310.1 gb:BC007070.1
1552971_at	5.4	A	48.3	A	11.3	A	6.3	A	28.3	A	30.9	A	166.6	A	21.8	A	19.2	A	49.9	A	10.9	A	16.5	A	gb:NM_139167.1 /DB_XREF=gi:21040252 /GEN=SGCZ /TID=Hs2.348641.1 /CNT=3 /FEA=FLmRNA /TIER=FL /STK=2 /LL=137868 /UG=Hs.348641 /DEF=Homo sapiens sarcoglycan zeta (SGCZ), mRNA. /PROD=sarcoglycan zeta /FL=gb:NM_139167.1 gb:AY028700.1
1552972_at	2.1	A	28.3	A	7.2	A	15.6	A	7	A	19.2	A	32.1	A	13.1	A	2.3	A	8.4	A	14.8	A	13.2	A	gb:NM_152711.1 /DB_XREF=gi:22749418 /TID=Hs2.375101.1 /CNT=3 /FEA=FLmRNA /TIER=FL /STK=2 /LL=219800 /UG_GENE=MGC43033 /UG=Hs.375101 /UG_TITLE=hypothetical protein MGC43033 /DEF=Homo sapiens hypothetical protein MGC43033 (MGC43033), mRNA. /FL=gb:BC031979.1 gb:NM_152711.1
1552973_at	49.5	A	34.6	A	18.5	A	19.8	A	23.2	A	19.5	A	43.4	A	14.3	A	55.5	A	32.5	A	20.8	A	28.5	A	gb:NM_003396.1 /DB_XREF=gi:17017975 /GEN=WNT15 /TID=Hs2.350957.1 /CNT=3 /FEA=FLmRNA /TIER=FL /STK=2 /LL=7484 /UG=Hs.350957 /DEF=Homo sapiens wingless-type MMTV integration site family, member 15 (WNT15), mRNA. /PROD=wingless-type MMTV integration site family,member 15 precursor /FL=gb:AB063483.1 gb:NM_003396.1
1552974_at	1.7	A	3.4	A	38	A	2.4	A	18.3	A	6	A	14.1	A	3.2	A	21.4	A	3.6	A	0.4	A	2.6	A	gb:NM_014130.1 /DB_XREF=gi:7662561 /TID=Hs2.278938.1 /CNT=3 /FEA=FLmRNA /TIER=FL /STK=2 /LL=29049 /UG_GENE=PRO0483 /UG=Hs.278938 /UG_TITLE=PRO0483 protein /DEF=Homo sapiens PRO0483 protein (PRO0483), mRNA. /FL=gb:AF090931.1 gb:NM_014130.1
1552975_x_at	55.4	A	8.7	A	67.8	A	18.7	A	7.4	A	19.7	A	114.2	A	4.7	A	26.4	A	30.9	A	34.1	A	9.1	A	gb:NM_014130.1 /DB_XREF=gi:7662561 /TID=Hs2.278938.1 /CNT=3 /FEA=FLmRNA /TIER=FL /STK=2 /LL=29049 /UG_GENE=PRO0483 /UG=Hs.278938 /UG_TITLE=PRO0483 protein /DEF=Homo sapiens PRO0483 protein (PRO0483), mRNA. /FL=gb:AF090931.1 gb:NM_014130.1
1552976_at	492.7	M	432.3	P	205	A	253.4	M	315.3	M	204.8	A	707.4	P	244.6	P	401	P	545.5	P	489	P	507.4	P	gb:NM_153614.1 /DB_XREF=gi:23957683 /GEN=TSARG3 /TID=Hs2.143594.1 /CNT=3 /FEA=FLmRNA /TIER=FL /STK=2 /LL=256790 /UG=Hs.143594 /DEF=Homo sapiens testis spermatogenesis apoptosis-related protein 3 (TSARG3), mRNA. /PROD=testis spermatogenesis apoptosis-related protein3 /FL=gb:NM_153614.1 gb:AF419291.1
1552977_a_at	876.6	P	1019	P	1303.2	P	968.3	P	1641.7	P	1605.1	P	1427.1	P	1436.3	P	922.5	P	1068	P	985.7	P	881.7	P	gb:NM_006586.1 /DB_XREF=gi:5729791 /GEN=TNRC5 /TID=Hs2.56828.1 /CNT=3 /FEA=FLmRNA /TIER=FL /STK=2 /LL=10695 /UG=Hs.56828 /DEF=Homo sapiens trinucleotide repeat containing 5 (TNRC5), mRNA. /PROD=trinucleotide repeat containing 5 /FL=gb:U80744.1 gb:NM_006586.1
1552978_a_at	709.3	P	1021.9	P	1006.3	P	879.9	P	666.1	P	514.5	P	575.4	P	367.4	P	759.4	P	1078.3	P	753.1	P	531	P	gb:NM_052822.1 /DB_XREF=gi:16445413 /GEN=SCAMP1 /TID=Hs2.31218.2 /CNT=3 /FEA=FLmRNA /TIER=FL /STK=2 /LL=9522 /UG=Hs.31218 /DEF=Homo sapiens secretory carrier membrane protein 1 (SCAMP1), transcript variant 2, mRNA. /PROD=secretory carrier membrane protein 1 isoform 2 /FL=gb:NM_052822.1 gb:BC009787.1
1552979_at	7.9	A	6.7	A	8.8	A	5.2	A	5.7	A	20.5	A	21.2	A	22.5	A	58.2	A	4.3	A	8.8	A	11.7	A	gb:NM_173513.1 /DB_XREF=gi:27735134 /TID=Hs2.375211.1 /CNT=3 /FEA=FLmRNA /TIER=FL /STK=2 /LL=151477 /UG_GENE=MGC43122 /UG=Hs.375211 /UG_TITLE=hypothetical protein MGC43122 /DEF=Homo sapiens hypothetical protein MGC43122 (MGC43122), mRNA. /FL=gb:NM_173513.1 gb:BC033054.1
1552980_at	161	A	218.6	P	117.9	A	115.2	P	41.2	A	121	A	137.2	A	73.8	A	197.4	A	201.5	A	187.6	A	138.4	A	gb:NM_138612.1 /DB_XREF=gi:20302154 /GEN=HAS3 /TID=Hs2.85962.2 /CNT=3 /FEA=FLmRNA /TIER=FL /STK=2 /LL=3038 /UG=Hs.85962 /DEF=Homo sapiens hyaluronan synthase 3 (HAS3), transcript variant 2, mRNA. /PROD=hyaluronan synthase 3, isoform b /FL=gb:NM_138612.1 gb:BC021853.1
1552982_a_at	19.8	A	191.8	A	13	A	18.9	A	28.5	A	24.9	A	40.6	A	71.6	A	66.1	A	51	A	23.1	A	116.6	A	gb:NM_002007.1 /DB_XREF=gi:4503700 /GEN=FGF4 /TID=Hs2.1755.1 /CNT=3 /FEA=FLmRNA /TIER=FL /STK=2 /LL=2249 /UG=Hs.1755 /DEF=Homo sapiens fibroblast growth factor 4 (heparin secretory transforming protein 1, Kaposi sarcoma oncogene) (FGF4), mRNA. /PROD=fibroblast growth factor 4 precursor /FL=gb:M17446.1 gb:NM_002007.1
1552985_at	134.6	A	144.6	A	141.1	A	47.5	A	43.6	A	121.7	A	16.7	A	84.9	A	141.4	A	163.1	A	166.1	A	206.2	A	gb:NM_173851.1 /DB_XREF=gi:27777666 /GEN=ZnT-8 /TID=Hs2.179082.1 /CNT=3 /FEA=FLmRNA /TIER=FL /STK=2 /LL=169026 /UG=Hs.179082 /DEF=Homo sapiens zinc transporter ZnT-8 (ZnT-8), mRNA. /PROD=zinc transporter ZnT-8 /FL=gb:NM_173851.1 gb:AY117411.1
1552986_at	24.8	A	25.3	A	11.4	A	12.2	A	7.7	A	29.5	A	32.3	A	13.7	A	9.9	A	18.4	A	30.7	A	11	A	gb:NM_138470.1 /DB_XREF=gi:19924002 /TID=Hs2.334930.1 /CNT=3 /FEA=FLmRNA /TIER=FL /STK=2 /LL=142937 /UG_GENE=LOC142937 /UG=Hs.334930 /UG_TITLE=hypothetical protein BC008131 /DEF=Homo sapiens hypothetical protein BC008131 (LOC142937), mRNA. /FL=gb:BC008131.1 gb:NM_138470.1
1552987_a_at	29.8	A	26.2	A	43.5	A	25.2	A	59.1	A	8.7	A	12.5	A	5.7	A	7.6	A	87.8	P	36	A	10.9	A	gb:NM_153241.1 /DB_XREF=gi:23397529 /TID=Hs2.374698.1 /CNT=3 /FEA=FLmRNA /TIER=FL /STK=2 /LL=201824 /UG_GENE=MGC42157 /UG=Hs.374698 /UG_TITLE=hypothetical protein MGC42157 /DEF=Homo sapiens hypothetical protein MGC42157 (MGC42157), mRNA. /FL=gb:NM_153241.1 gb:BC030111.1
1552988_at	4.4	A	11.5	A	91.2	P	3.8	A	53.2	A	3.8	A	30.4	A	47.1	A	46.1	A	59.8	A	41.3	P	19.4	A	gb:NM_152587.1 /DB_XREF=gi:22749208 /TID=Hs2.348502.1 /CNT=3 /FEA=FLmRNA /TIER=FL /STK=2 /LL=160140 /UG_GENE=MGC33948 /UG=Hs.348502 /UG_TITLE=hypothetical protein MGC33948 /DEF=Homo sapiens hypothetical protein MGC33948 (MGC33948), mRNA. /FL=gb:BC029536.1 gb:NM_152587.1
1552990_at	9.2	A	4.6	A	7	A	4.6	A	9.6	A	8.6	A	29.9	A	6.9	A	6.9	A	6.8	A	6	A	3	A	gb:NM_152656.1 /DB_XREF=gi:22749332 /TID=Hs2.375102.1 /CNT=3 /FEA=FLmRNA /TIER=FL /STK=2 /LL=199714 /UG_GENE=MGC35045 /UG=Hs.375102 /UG_TITLE=hypothetical protein MGC35045 /DEF=Homo sapiens hypothetical protein MGC35045 (MGC35045), mRNA. /FL=gb:BC031875.1 gb:NM_152656.1
1552991_at	118	A	159.5	A	116.3	A	47.9	A	41.9	A	108.7	A	150.7	A	55.5	A	147.1	A	110.6	A	129.3	A	138.7	A	gb:NM_153444.1 /DB_XREF=gi:23592221 /GEN=JCG3 /TID=Hs2.351824.1 /CNT=3 /FEA=FLmRNA /TIER=FL /STK=2 /LL=120065 /UG=Hs.351824 /DEF=Homo sapiens olfactory receptor-like protein JCG3 (JCG3), mRNA. /PROD=olfactory receptor-like protein JCG3 /FL=gb:NM_153444.1 gb:AF173006.1
1552993_at	2.5	A	4.8	A	3.7	A	18.7	A	10.4	A	5.8	A	31.9	A	3	A	5.8	A	4.8	A	40.6	A	20.4	A	gb:NM_138812.1 /DB_XREF=gi:20270376 /TID=Hs2.352563.1 /CNT=3 /FEA=FLmRNA /TIER=FL /STK=2 /LL=143241 /UG_GENE=LOC143241 /UG=Hs.352563 /UG_TITLE=hypothetical protein BC019250 /DEF=Homo sapiens hypothetical protein BC019250 (LOC143241), mRNA. /FL=gb:NM_138812.1 gb:BC019250.1
1552995_at	25.6	A	16.8	A	102.4	A	50.1	A	51.3	A	154.5	A	63.2	A	17.7	A	16.9	A	11	A	13.2	A	22.5	A	gb:NM_145659.2 /DB_XREF=gi:28416912 /GEN=IL30 /TID=Hs2.375043.1 /CNT=3 /FEA=FLmRNA /TIER=FL /STK=2 /LL=246778 /UG=Hs.375043 /DEF=Homo sapiens interleukin 30 (IL30), mRNA. /PROD=interleukin 30 /FL=gb:NM_145659.2 gb:AY099296.1
1552997_a_at	230.3	A	172.7	A	125.7	A	161.2	A	158.7	A	92.4	A	337.5	A	240.3	A	269.2	A	206.1	A	177.4	A	181.3	A	gb:NM_152397.1 /DB_XREF=gi:22748846 /TID=Hs2.210956.1 /CNT=3 /FEA=FLmRNA /TIER=FL /STK=2 /LL=132141 /UG_GENE=MGC39725 /UG=Hs.210956 /UG_TITLE=hypothetical protein MGC39725 /DEF=Homo sapiens hypothetical protein MGC39725 (MGC39725), mRNA. /FL=gb:BC029595.1 gb:NM_152397.1
1552998_at	36.6	A	67.8	A	67	A	10.6	A	10	A	16.3	A	224.7	A	67.5	A	20.4	A	15.4	A	12.1	A	32.9	A	gb:NM_153325.1 /DB_XREF=gi:24233573 /GEN=DEFB125 /TID=Hs2.380220.1 /CNT=3 /FEA=FLmRNA /TIER=FL /STK=2 /LL=245938 /UG=Hs.380220 /DEF=Homo sapiens defensin, beta 125 (DEFB125), mRNA. /PROD=defensin, beta 125 /FL=gb:NM_153325.1 gb:AY122477.1
1552999_a_at	21.2	A	143.9	A	14.1	A	55.7	A	10.4	A	17.4	A	30	A	11.5	A	28.1	A	5.9	A	59	A	34.2	A	gb:NM_172006.1 /DB_XREF=gi:26006868 /GEN=WFDC10B /TID=Hs2.209294.1 /CNT=3 /FEA=FLmRNA /TIER=FL /STK=2 /LL=280664 /UG=Hs.209294 /DEF=Homo sapiens WAP four-disulfide core domain 10B (WFDC10B), transcript variant 1, mRNA. /PROD=protease inhibitor WAP12 isoform a /FL=gb:AF454506.1 gb:NM_172006.1
1553002_at	52.2	A	17.3	A	27.9	A	9.2	A	35.4	A	6.4	A	102.8	A	6.4	A	60.5	A	10.4	A	62.6	A	25.7	A	gb:NM_152250.1 /DB_XREF=gi:22748616 /GEN=DEFB105 /TID=Hs2.381378.1 /CNT=3 /FEA=FLmRNA /TIER=FL /STK=2 /LL=260312 /UG=Hs.381378 /DEF=Homo sapiens defensin, beta 105 (DEFB105), mRNA. /PROD=defensin, beta 105 /FL=gb:AB089180.1 gb:NM_152250.1
1553003_at	84.3	A	250.5	A	86	A	50.5	A	42.5	A	143.6	A	141.8	A	81.6	A	101.3	A	180.6	A	137	A	150	A	gb:NM_170724.1 /DB_XREF=gi:25777666 /GEN=PKHD1 /TID=Hs2.143943.2 /CNT=2 /FEA=FLmRNA /TIER=FL /STK=2 /LL=5314 /UG=Hs.143943 /DEF=Homo sapiens polycystic kidney and hepatic disease 1 (autosomal recessive) (PKHD1), transcript variant 2, mRNA. /PROD=polycystic kidney and hepatic disease 1 isoform2 /FL=gb:NM_170724.1 gb:AY092083.1
1553004_at	117.8	A	76.7	A	12.3	A	5.5	A	59.5	A	56.7	A	126.6	A	42.4	A	43.7	A	69.4	A	148	A	59.1	A	gb:NM_138295.1 /DB_XREF=gi:19923083 /GEN=PKD1L1 /TID=Hs2.242802.1 /CNT=2 /FEA=FLmRNA /TIER=FL /STK=2 /LL=168507 /UG=Hs.242802 /DEF=Homo sapiens polycystic kidney disease 1 like 1 (PKD1L1), mRNA. /PROD=polycystic kidney disease 1 like 1 /FL=gb:AB061683.1 gb:NM_138295.1
1553006_at	16.2	A	80.3	A	7.6	A	9.1	A	41.4	A	11.4	A	26.9	A	9.4	A	10	A	58.4	A	32.5	A	20.6	A	gb:NM_153834.1 /DB_XREF=gi:24475864 /GEN=GPR112 /TID=Hs2.381354.1 /CNT=2 /FEA=FLmRNA /TIER=FL /STK=2 /LL=139378 /UG=Hs.381354 /DEF=Homo sapiens G protein-coupled receptor 112 (GPR112), mRNA. /PROD=G-protein coupled receptor 112 /FL=gb:NM_153834.1 gb:AY140954.1
1553007_a_at	5.8	A	7.8	A	9.6	A	30.8	A	15.1	A	7.2	A	40.5	A	12.4	A	8.7	A	12.4	A	6.3	A	59.9	A	gb:NM_014253.1 /DB_XREF=gi:7657410 /GEN=ODZ1 /TID=Hs2.23796.1 /CNT=2 /FEA=FLmRNA /TIER=FL /STK=2 /LL=10178 /UG=Hs.23796 /DEF=Homo sapiens odz, odd Ozten-m homolog 1(Drosophila) (ODZ1), mRNA. /PROD=odz, odd Ozten-m homolog 1(Drosophila) /FL=gb:AF100772.1 gb:NM_014253.1
1553009_s_at	21.9	A	7.4	A	5.2	A	3.9	A	4.2	A	12.6	A	25.6	A	4	A	12.4	A	5.6	A	4.8	A	9.9	A	gb:NM_172239.1 /DB_XREF=gi:26665874 /GEN=GOR /TID=Hs2.437111.1 /CNT=2 /FEA=FLmRNA /TIER=FL /STK=2 /LL=254958 /UG=Hs.437111 /DEF=Homo sapiens exonuclease GOR (GOR), mRNA. /PROD=exonuclease GOR /FL=gb:AF495523.1 gb:NM_172239.1
1553011_at	68.5	A	166.8	A	189	A	79.5	A	122.4	A	132.5	A	139.5	A	85.2	A	121.7	A	137.9	A	50.4	A	22.5	A	gb:NM_153809.1 /DB_XREF=gi:24429571 /GEN=TAF1L /TID=Hs2.406146.1 /CNT=2 /FEA=FLmRNA /TIER=FL /STK=2 /LL=138474 /UG=Hs.406146 /DEF=Homo sapiens TAF1-like RNA polymerase II, TATA box binding protein (TBP)-associated factor, 210kDa (TAF1L), mRNA. /PROD=TBP-associated factor RNA polymerase 1-like /FL=gb:AF390562.1 gb:NM_153809.1
1553013_at	101.7	A	111.1	A	12.9	A	88.9	A	79.8	A	69.7	A	164.2	A	73.5	A	114.8	A	151.7	A	60.3	A	86.3	A	gb:NM_130773.2 /DB_XREF=gi:20544138 /GEN=caspr5 /TID=Hs2.350768.1 /CNT=2 /FEA=FLmRNA /TIER=FL /STK=2 /LL=129684 /UG=Hs.350768 /DEF=Homo sapiens caspr5 protein (caspr5), transcript variant 1, mRNA. /PROD=caspr5 protein isoform 1 /FL=gb:NM_130773.2 gb:AB077881.1
1553015_a_at	612.1	P	512.5	P	707.9	P	552.6	M	712.4	A	314.7	A	478.3	A	1473.3	P	1788.4	P	1532.8	P	1079.7	P	2291	P	gb:NM_004260.1 /DB_XREF=gi:4759029 /GEN=RECQL4 /TID=Hs2.31442.1 /CNT=2 /FEA=FLmRNA /TIER=FL /STK=2 /LL=9401 /UG=Hs.31442 /DEF=Homo sapiens RecQ protein-like 4 (RECQL4), mRNA. /PROD=RecQ protein-like 4 /FL=gb:NM_004260.1 gb:AB006532.1
1553016_at	117.6	A	66.6	A	77.2	A	13.6	A	72.9	A	202.1	A	29.8	A	9.1	A	131.9	A	47.2	A	99.9	A	156.1	A	gb:NM_153835.1 /DB_XREF=gi:24475866 /GEN=GPR113 /TID=Hs2.116073.1 /CNT=2 /FEA=FLmRNA /TIER=FL /STK=2 /LL=165082 /UG=Hs.116073 /DEF=Homo sapiens G protein-coupled receptor 113 (GPR113), mRNA. /PROD=G-protein coupled receptor 113 /FL=gb:NM_153835.1 gb:AY140955.1
1553019_at	481.5	A	244.1	A	201.9	A	165.7	A	664.4	A	199.5	A	422.4	A	79.4	A	372.9	A	415.6	A	169	A	301	A	gb:NM_080751.1 /DB_XREF=gi:20304092 /GEN=TMC2 /TID=Hs2.352626.1 /CNT=2 /FEA=FLmRNA /TIER=FL /STK=2 /LL=117532 /UG=Hs.352626 /DEF=Homo sapiens transmembrane, cochlear expressed, 2 (TMC2), mRNA. /PROD=transmembrane cochlear-expressed protein 2 /FL=gb:NM_080751.1 gb:AF417580.1
1553020_at	42.9	A	106.6	A	65.8	A	60.9	A	4.8	A	48.2	A	178.7	A	101.7	P	80.1	A	104.3	A	99.1	A	81.1	A	gb:NM_144774.1 /DB_XREF=gi:21426842 /TID=Hs2.352643.1 /CNT=2 /FEA=FLmRNA /TIER=FL /STK=2 /LL=140771 /UG_GENE=SMCR5 /UG=Hs.352643 /UG_TITLE=Smith-Magenis syndrome chromosome region, candidate 5 /DEF=Homo sapiens Smith-Magenis syndrome chromosome region, candidate 5 (SMCR5), mRNA. /FL=gb:NM_144774.1 gb:AF467442.1
1553021_s_at	398	A	702	A	241.5	A	334.9	A	390.5	A	552.6	A	351.5	A	457.6	A	325.9	A	340.8	A	302.3	A	315.3	A	gb:NM_015250.1 /DB_XREF=gi:21735416 /GEN=BICD2 /TID=Hs2.330988.1 /CNT=2 /FEA=FLmRNA /TIER=FL /STK=2 /LL=23299 /UG=Hs.330988 /DEF=Homo sapiens coiled-coil protein BICD2 (BICD2), mRNA. /PROD=coiled-coil protein BICD2 /FL=gb:NM_015250.1 gb:AY052562.1
1553022_at	31.6	A	1.9	A	1.9	A	1.5	A	2.1	A	6.5	A	17.9	A	3.9	A	34.4	A	1.9	A	2.9	A	6	A	gb:NM_052882.1 /DB_XREF=gi:16418390 /GEN=ZIM3 /TID=Hs2.348622.1 /CNT=2 /FEA=FLmRNA /TIER=FL /STK=2 /LL=114026 /UG=Hs.348622 /DEF=Homo sapiens zinc finger, imprinted 3 (ZIM3), mRNA. /PROD=zinc finger, imprinted 3 /FL=gb:NM_052882.1 gb:AF365931.1
1553023_a_at	139.9	A	218.3	M	101.1	A	26.9	A	204.9	A	126.2	A	156.2	A	15.7	A	163.4	A	17.6	A	108.4	A	77.7	A	gb:NM_024505.2 /DB_XREF=gi:20127623 /GEN=NOX5 /TID=Hs2.160199.1 /CNT=2 /FEA=FLmRNA /TIER=FL /STK=2 /LL=79400 /UG=Hs.160199 /DEF=Homo sapiens NADPH oxidase, EF hand calcium-binding domain 5 (NOX5), mRNA. /PROD=NADPH oxidase, EF hand calcium-binding domain 5 /FL=gb:NM_024505.2 gb:AF325190.1
1553024_at	5.3	A	14.6	A	18.7	A	31.8	A	77.3	A	11.7	A	83	A	21.9	A	7.4	A	44.8	A	50.8	A	24.1	A	gb:NM_172368.1 /DB_XREF=gi:27363481 /GEN=G30 /TID=Hs2.406746.1 /CNT=2 /FEA=FLmRNA /TIER=FL /STK=2 /LL=282706 /UG=Hs.406746 /DEF=Homo sapiens putative protein LG30 (G30), mRNA. /PROD=putative protein LG30 /FL=gb:AY138548.1 gb:NM_172368.1
1553025_at	18.2	A	17.4	A	16.3	A	8.4	A	12.9	A	8.6	A	42.5	A	52.1	A	26.8	A	7.8	A	21.2	A	10.4	A	gb:NM_020455.1 /DB_XREF=gi:28269674 /GEN=GPR126 /TID=Hs2Affx.1.4 /CNT=2 /FEA=FLmRNA /TIER=FL /STK=2 /NOTE=sequence(s) not in UniGene /DEF=Homo sapiens G protein-coupled receptor 126 (GPR126), mRNA. /PROD=G protein-coupled receptor 126 /FL=gb:NM_020455.1 gb:AY181244.1
1553027_a_at	39	A	128.9	A	36.8	A	337.6	A	871.4	P	40	A	45.6	A	26.2	A	164.2	A	245.3	A	24.8	A	216.7	A	gb:NM_057162.1 /DB_XREF=gi:17017979 /GEN=KLHL4 /TID=Hs2.49075.2 /CNT=2 /FEA=FLmRNA /TIER=FL /STK=2 /LL=56062 /UG=Hs.49075 /DEF=Homo sapiens kelch-like 4 (Drosophila) (KLHL4), transcript variant 2, mRNA. /PROD=kelch-like 4, isoform 2 /FL=gb:NM_057162.1 gb:AF284766.1
1553028_at	8.5	A	28	A	28.3	A	110.1	A	26.1	A	35.5	A	53.1	A	48.1	A	41.7	A	17.5	A	37.1	A	26.7	A	gb:NM_153002.1 /DB_XREF=gi:23308584 /GEN=GABABL /TID=Hs2.308230.1 /CNT=2 /FEA=FLmRNA /TIER=FL /STK=2 /LL=165829 /UG=Hs.308230 /DEF=Homo sapiens GABAB-related G-protein coupled receptor (GABABL), mRNA. /PROD=GABAB-related G-protein coupled receptor /FL=gb:AF488739.1 gb:NM_153002.1
1553030_a_at	302.7	P	338.5	P	253.7	P	134.2	P	320.1	P	322.6	P	193.8	A	395.2	P	305.7	P	370	P	294.5	P	184.5	A	gb:NM_000456.1 /DB_XREF=gi:4557866 /GEN=SUOX /TID=Hs2.16340.1 /CNT=2 /FEA=FLmRNA /TIER=FL /STK=2 /LL=6821 /UG=Hs.16340 /UG_TITLE=sulfite oxidase /DEF=Homo sapiens sulfite oxidase (SUOX), nuclear gene encoding mitochondrial protein, mRNA. /FL=gb:NM_000456.1 gb:L31573.1
1553031_at	151.7	A	229.5	A	133.8	A	57.5	A	219.9	A	160.6	A	106.9	A	78.4	A	141.1	A	55	A	120.9	A	116.5	A	gb:NM_153838.1 /DB_XREF=gi:24475872 /GEN=GPR115 /TID=Hs2.57887.1 /CNT=2 /FEA=FLmRNA /TIER=FL /STK=2 /LL=221393 /UG=Hs.57887 /DEF=Homo sapiens G protein-coupled receptor 115 (GPR115), mRNA. /PROD=G-protein coupled receptor 115 /FL=gb:NM_153838.1 gb:AY140957.1
1553032_at	2.2	A	7	A	5.1	A	16.8	A	10.3	A	4.3	A	76.7	A	40.7	A	8.8	A	21.6	A	18.1	A	8.9	A	gb:NM_139017.2 /DB_XREF=gi:21314784 /GEN=CRL3 /TID=Hs2.351813.1 /CNT=2 /FEA=FLmRNA /TIER=FL /STK=2 /LL=133396 /UG=Hs.351813 /DEF=Homo sapiens gp130-like monocyte receptor (CRL3), mRNA. /PROD=gp130-like monocyte receptor /FL=gb:AF486620.1 gb:NM_139017.2
1553033_at	16.9	A	54.4	A	11.3	A	9.2	A	4.9	A	6	A	280.4	A	21.5	A	139.4	A	548	P	4.9	A	449.5	A	gb:NM_138780.1 /DB_XREF=gi:20270304 /GEN=SYTL5 /TID=Hs2.367758.1 /CNT=2 /FEA=FLmRNA /TIER=FL /STK=2 /LL=94122 /UG=Hs.367758 /DEF=Homo sapiens synaptotagmin-like 5 (SYTL5), mRNA. /PROD=synaptotagmin-like 5 /FL=gb:NM_138780.1 gb:AB080222.1
1553034_at	55	A	52.7	P	59.2	M	205.7	P	208	P	66.2	P	337.1	P	88.5	P	217.6	P	255.7	P	72.3	P	228.9	P	gb:NM_006642.1 /DB_XREF=gi:28269671 /GEN=SDCCAG8 /TID=Hs2Affx.1.6 /CNT=2 /FEA=FLmRNA /TIER=FL /STK=2 /NOTE=sequence(s) not in UniGene /DEF=Homo sapiens serologically defined colon cancer antigen 8 (SDCCAG8), mRNA. /PROD=serologically defined colon cancer antigen 8 /FL=gb:AF250731.1 gb:NM_006642.1
1553036_at	16	A	13.2	A	7.6	A	6.9	A	16.6	A	9.4	A	43.7	A	12.5	A	20.6	A	13	A	19.6	A	9.9	A	gb:NM_153839.1 /DB_XREF=gi:24475874 /GEN=GPR111 /TID=Hs2.381370.1 /CNT=2 /FEA=FLmRNA /TIER=FL /STK=2 /LL=222611 /UG=Hs.381370 /DEF=Homo sapiens G protein-coupled receptor 111 (GPR111), mRNA. /PROD=G-protein coupled receptor 111 /FL=gb:NM_153839.1 gb:AY140953.1
1553037_a_at	6.3	A	33.7	A	7.9	A	39.1	A	8.2	A	51.9	A	110.1	A	8.9	A	49.4	A	40.9	P	7.9	A	52.8	A	gb:NM_133625.1 /DB_XREF=gi:19924102 /GEN=SYN2 /TID=Hs2.6439.2 /CNT=2 /FEA=FLmRNA /TIER=FL /STK=2 /LL=6854 /UG=Hs.6439 /DEF=Homo sapiens synapsin II (SYN2), transcript variant IIa, mRNA. /PROD=synapsin II isoform IIa /FL=gb:NM_133625.1 gb:AF077671.1
1553039_a_at	61	A	57	A	47.8	A	79.2	A	144.2	A	56.4	A	57.9	A	36.4	A	41.2	A	54.8	A	56.7	A	38.6	A	gb:NM_080871.2 /DB_XREF=gi:22208953 /GEN=ASB10 /TID=Hs2.304273.1 /CNT=2 /FEA=FLmRNA /TIER=FL /STK=2 /LL=136371 /UG=Hs.304273 /DEF=Homo sapiens ankyrin repeat and SOCS box-containing 10 (ASB10), mRNA. /PROD=ankyrin repeat and SOCS box-containing protein10 /FL=gb:AF417920.1 gb:NM_080871.2
1553041_at	35.4	A	25.5	A	10.2	A	18.7	A	18.8	A	16.9	A	50.7	A	17	A	39.7	A	15.3	A	22.5	A	25	A	gb:NM_130770.1 /DB_XREF=gi:18640739 /GEN=HTR3C /TID=Hs2.352185.1 /CNT=2 /FEA=FLmRNA /TIER=FL /STK=2 /LL=170572 /UG=Hs.352185 /DEF=Homo sapiens 5-hydroxytryptamine receptor 3 subunit C (HTR3C), mRNA. /PROD=5-hydroxytryptamine receptor 3 subunit C /FL=gb:AF459285.1 gb:NM_130770.1
1553042_a_at	162.9	A	64.8	A	102.1	A	89.6	A	112.6	A	145.5	A	34.9	A	80.5	A	338.1	A	85.7	A	73.2	A	133.2	A	gb:NM_032721.2 /DB_XREF=gi:21245099 /GEN=TA-NFKBH /TID=Hs2.60088.1 /CNT=2 /FEA=FLmRNA /TIER=FL /STK=2 /LL=84807 /UG=Hs.60088 /DEF=Homo sapiens T-cell activation NFKB-like protein (TA-NFKBH), mRNA. /PROD=T-cell activation NFKB-like protein /FL=gb:NM_032721.2 gb:AF385433.1
1553043_a_at	20.5	A	18.1	A	6.8	A	22	A	48.1	A	31.5	A	181.7	A	5.4	A	84.5	A	8	A	986.9	P	11.3	A	gb:NM_139018.1 /DB_XREF=gi:20502981 /GEN=NKIR /TID=Hs2.235768.1 /CNT=2 /FEA=FLmRNA /TIER=FL /STK=2 /LL=146722 /UG=Hs.235768 /DEF=Homo sapiens NK inhibitory receptor precursor (NKIR), mRNA. /PROD=NK inhibitory receptor precursor /FL=gb:NM_139018.1 gb:AF251706.1
1553044_at	8.9	A	107.4	A	62.3	A	102.5	A	113.8	A	48.7	A	90	A	48.5	A	138	A	123.7	A	45.3	A	78.7	A	gb:NM_032602.1 /DB_XREF=gi:14211940 /GEN=CX62 /TID=Hs2.334499.1 /CNT=2 /FEA=FLmRNA /TIER=FL /STK=2 /LL=84694 /UG=Hs.334499 /DEF=Homo sapiens connexin 62 (CX62), mRNA. /PROD=connexin 62 /FL=gb:NM_032602.1 gb:AF296766.1
1553045_at	25.4	A	12.2	A	39.4	A	70.3	A	4.4	A	21.8	A	24.3	A	6.4	A	33.5	A	11.9	A	61.5	A	26.2	A	gb:NM_003395.1 /DB_XREF=gi:15082260 /GEN=WNT14 /TID=Hs2.336947.1 /CNT=2 /FEA=FLmRNA /TIER=FL /STK=2 /LL=7483 /UG=Hs.336947 /DEF=Homo sapiens wingless-type MMTV integration site family, member 14 (WNT14), mRNA. /PROD=wingless-type MMTV integration site family,member 14 /FL=gb:NM_003395.1 gb:AB060283.1
1553046_s_at	24.7	A	55.6	A	32	A	30.1	A	37.6	A	44.4	A	81.7	A	17.4	A	35.6	A	60.4	A	51.7	A	91.6	A	gb:NM_022134.1 /DB_XREF=gi:11545866 /GEN=GP3ST /TID=Hs2.348659.1 /CNT=2 /FEA=FLmRNA /TIER=FL /STK=2 /LL=64090 /UG=Hs.348659 /DEF=Homo sapiens glycoprotein beta-Gal 3-sulfotransferase (GP3ST), mRNA. /PROD=glycoprotein beta-Gal 3-sulfotransferase /FL=gb:AB040610.1 gb:NM_022134.1
1553047_at	348.8	A	199.4	A	201.7	A	188.7	A	84.7	A	168.1	A	90.9	A	215.1	A	311.2	A	309.9	A	290.1	A	280.6	A	gb:NM_138687.1 /DB_XREF=gi:20336255 /GEN=PIP5K2B /TID=Hs2.6335.2 /CNT=2 /FEA=FLmRNA /TIER=FL /STK=2 /LL=8396 /UG=Hs.6335 /DEF=Homo sapiens phosphatidylinositol-4-phosphate 5-kinase, type II, beta (PIP5K2B), transcript variant 2, mRNA. /PROD=phosphatidylinositol-4-phosphate 5-kinase typeII beta isoform b /FL=gb:NM_138687.1 gb:BC027459.1
1553048_a_at	509.8	P	521.8	P	294.8	P	339.5	P	290.1	P	251	P	620.1	P	331.2	P	513.9	P	393.2	P	389	P	308.8	P	gb:NM_138687.1 /DB_XREF=gi:20336255 /GEN=PIP5K2B /TID=Hs2.6335.2 /CNT=2 /FEA=FLmRNA /TIER=FL /STK=2 /LL=8396 /UG=Hs.6335 /DEF=Homo sapiens phosphatidylinositol-4-phosphate 5-kinase, type II, beta (PIP5K2B), transcript variant 2, mRNA. /PROD=phosphatidylinositol-4-phosphate 5-kinase typeII beta isoform b /FL=gb:NM_138687.1 gb:BC027459.1
1553051_s_at	11.4	A	50.5	A	7.3	A	36.3	A	25.5	A	8.8	A	155.5	A	13.1	A	37.5	A	20.4	A	46.1	A	26.5	A	gb:NM_053280.2 /DB_XREF=gi:19526474 /GEN=ODF3 /TID=Hs2.350949.1 /CNT=2 /FEA=FLmRNA /TIER=FL /STK=2 /LL=113746 /UG=Hs.350949 /DEF=Homo sapiens outer dense fiber of sperm tails 3 (ODF3), mRNA. /PROD=sperm tail protein SHIPPO1 /FL=gb:NM_053280.2 gb:AB067774.1
1553052_at	11.1	A	47.5	A	12.8	A	12.9	A	9.9	A	10.1	A	68.6	A	43.4	A	18.8	A	8.5	A	52.6	A	20	A	gb:NM_172005.1 /DB_XREF=gi:25188180 /GEN=WFDC13 /TID=Hs2.406733.1 /CNT=2 /FEA=FLmRNA /TIER=FL /STK=2 /LL=164237 /UG=Hs.406733 /DEF=Homo sapiens WAP four-disulfide core domain 13 (WFDC13), mRNA. /PROD=probable protease inhibitor WAP13 /FL=gb:NM_172005.1 gb:AF454505.1
1553053_at	8	A	14.2	A	11.5	A	5.1	A	6.4	A	27.6	A	89.5	A	6.4	A	28.9	A	16	A	12.1	A	19	A	gb:NM_152777.1 /DB_XREF=gi:22749522 /TID=Hs2.374952.1 /CNT=2 /FEA=FLmRNA /TIER=FL /STK=2 /LL=256369 /UG_GENE=C14orf48 /UG=Hs.374952 /UG_TITLE=chromosome 14 open reading frame 48 /DEF=Homo sapiens chromosome 14 open reading frame 48 (C14orf48), mRNA. /FL=gb:NM_152777.1 gb:BC021728.1
1553055_a_at	223.5	P	459.8	P	739.4	P	987.7	P	1024.6	P	883.7	P	1639.5	P	348.8	P	616.9	P	295.4	P	451.5	P	215.2	M	gb:NM_144975.1 /DB_XREF=gi:21450660 /TID=Hs2.352216.1 /CNT=2 /FEA=FLmRNA /TIER=FL /STK=2 /LL=162394 /UG_GENE=MGC19764 /UG=Hs.352216 /UG_TITLE=hypothetical protein MGC19764 /DEF=Homo sapiens hypothetical protein MGC19764 (MGC19764), mRNA. /FL=gb:NM_144975.1 gb:BC021238.1
1553057_at	222.5	A	225.2	A	119	A	109.7	A	186.8	A	145.4	A	230.8	A	74.1	A	55.5	A	182.6	A	202.9	A	220.3	A	gb:NM_080474.1 /DB_XREF=gi:17998550 /TID=Hs2.348541.1 /CNT=2 /FEA=FLmRNA /TIER=FL /STK=2 /LL=89777 /UG_GENE=SERPINB12 /UG=Hs.348541 /UG_TITLE=serine (or cysteine) proteinase inhibitor, clade B (ovalbumin), member 12 /DEF=Homo sapiens serine (or cysteine) proteinase inhibitor, clade B (ovalbumin), member 12 (SERPINB12), mRNA. /FL=gb:NM_080474.1 gb:AF411191.1
1553058_at	123.5	A	179.1	A	17.9	A	35.9	A	23.6	A	71.2	A	75.1	A	43.6	A	164.8	A	47.9	A	23.5	A	24.7	A	gb:NM_133261.1 /DB_XREF=gi:18959203 /GEN=GIPC3 /TID=Hs2.352636.1 /CNT=2 /FEA=FLmRNA /TIER=FL /STK=2 /LL=126326 /UG=Hs.352636 /DEF=Homo sapiens PDZ domain protein GIPC3 (GIPC3), mRNA. /PROD=PDZ domain protein GIPC3 /FL=gb:NM_133261.1 gb:AB073738.1
1553059_at	26.9	A	26.4	A	8.2	A	47.2	A	87.3	A	137.7	A	33.2	A	31.9	A	21.1	A	10.7	A	117.8	A	95.5	A	gb:NM_052891.1 /DB_XREF=gi:16418404 /GEN=PGLYRPIalpha /TID=Hs2.348266.1 /CNT=2 /FEA=FLmRNA /TIER=FL /STK=2 /LL=114771 /UG=Hs.348266 /DEF=Homo sapiens peptidoglycan recognition protein-I-alpha precursor (PGLYRPIalpha), mRNA. /PROD=peptidoglycan recognition protein-I-alphaprecursor /FL=gb:AY035376.1 gb:NM_052891.1
1553060_at	58.1	A	152.3	M	88.2	A	69.9	A	100.4	P	167.8	A	578.4	A	88.7	A	146.4	A	196.5	A	195.7	A	100.6	A	gb:NM_033126.1 /DB_XREF=gi:14916454 /GEN=PSKH2 /TID=Hs2.336929.1 /CNT=2 /FEA=FLmRNA /TIER=FL /STK=2 /LL=85481 /UG=Hs.336929 /DEF=Homo sapiens serinethreonine kinase PSKH2 (PSKH2), mRNA. /PROD=serinethreonine kinase PSKH2 /FL=gb:NM_033126.1 gb:AY037806.1
1553061_at	9.7	A	23.4	A	10.1	A	6.4	A	18.1	A	10.7	A	37.9	A	6	A	13.9	A	28.2	A	9.4	A	10.8	A	gb:NM_033519.1 /DB_XREF=gi:15723373 /GEN=sdolf /TID=Hs2.339818.1 /CNT=2 /FEA=FLmRNA /TIER=FL /STK=2 /LL=89883 /UG=Hs.339818 /DEF=Homo sapiens olfactory receptor sdolf (sdolf), mRNA. /PROD=olfactory receptor sdolf /FL=gb:NM_033519.1 gb:AF286696.1
1553062_at	37.4	A	18.3	A	17.5	A	24.1	A	34.8	A	28	A	45.2	A	62	A	37.1	A	22.6	A	40.5	A	37.9	A	gb:NM_058165.1 /DB_XREF=gi:17157994 /GEN=DGAT2L1 /TID=Hs2.344090.1 /CNT=2 /FEA=FLmRNA /TIER=FL /STK=2 /LL=116255 /UG=Hs.344090 /DEF=Homo sapiens diacylglycerol O-acyltransferase 2 like 1 (DGAT2L1), mRNA. /PROD=diacylglycerol O-acyltransferase 2 like 1 /FL=gb:NM_058165.1 gb:AF384163.1
1553063_at	67.8	A	344.5	P	147.9	A	145.2	A	87	A	133.8	A	170.1	A	91.8	A	90.2	A	178.2	A	154.7	A	110.1	A	gb:NM_080819.1 /DB_XREF=gi:18201873 /GEN=GPR78 /TID=Hs2.350588.1 /CNT=2 /FEA=FLmRNA /TIER=FL /STK=2 /LL=27201 /UG=Hs.350588 /DEF=Homo sapiens G protein-coupled receptor 78 (GPR78), mRNA. /PROD=G protein-coupled receptor 78 /FL=gb:NM_080819.1 gb:AF411107.1
1553064_at	4.5	A	44.3	A	3.7	A	5.1	A	16.1	A	27.1	A	30.5	A	25	A	16.6	A	35	A	14.7	A	30.6	A	gb:NM_153833.1 /DB_XREF=gi:24475862 /GEN=osH1 /TID=Hs2.97358.1 /CNT=2 /FEA=FLmRNA /TIER=FL /STK=2 /LL=132243 /UG=Hs.97358 /DEF=Homo sapiens oocyte-specific histone H1 (osH1), mRNA. /PROD=oocyte-specific histone H1 /FL=gb:NM_153833.1 gb:AY158091.1
1553066_at	162.2	A	111.6	A	88.8	A	5.3	A	85.5	A	73.7	A	210.6	A	9.3	A	17	A	93.5	A	85.5	A	75.7	A	gb:NM_175057.1 /DB_XREF=gi:28173561 /GEN=TAR3 /TID=Hs2Affx.1.7 /CNT=2 /FEA=FLmRNA /TIER=FL /STK=2 /NOTE=sequence(s) not in UniGene /DEF=Homo sapiens trace amine receptor 3 (TAR3), mRNA. /PROD=trace amine receptor 3 /FL=gb:NM_175057.1 gb:AY183469.1
1553067_a_at	244.9	A	40.2	A	42.2	A	62.6	A	101.6	A	49.4	A	56.8	A	43.1	A	86.6	A	76	A	275.8	A	108.2	A	gb:NM_057163.1 /DB_XREF=gi:19882238 /GEN=GNRHR2 /TID=Hs2.356873.1 /CNT=2 /FEA=FLmRNA /TIER=FL /STK=2 /LL=114814 /UG=Hs.356873 /DEF=Homo sapiens gonadotropin-releasing hormone (type 2) receptor 2 (GNRHR2), mRNA. /PROD=gonadotropin-releasing hormone (type 2) receptor2 /FL=gb:AY081843.1 gb:NM_057163.1
1553069_at	109.9	A	34	A	19.1	A	13.4	A	149.4	A	85.8	A	70.1	A	37.6	A	84.8	A	25.7	A	21.9	A	19.3	A	gb:NM_153455.1 /DB_XREF=gi:23592243 /TID=Hs2.190548.1 /CNT=2 /FEA=FLmRNA /TIER=FL /STK=2 /LL=257357 /UG_GENE=C21orf87 /UG=Hs.190548 /UG_TITLE=chromosome 21 open reading frame 87 /DEF=Homo sapiens chromosome 21 open reading frame 87 (C21orf87), mRNA. /FL=gb:AF426265.1 gb:NM_153455.1
1553070_a_at	34.9	A	29.6	A	146.4	A	130.3	A	102.5	A	267	A	92.3	A	77.6	A	62.3	A	29.4	A	114	A	143.7	A	gb:NM_133371.1 /DB_XREF=gi:19115961 /GEN=MYOZ3 /TID=Hs2.91626.1 /CNT=2 /FEA=FLmRNA /TIER=FL /STK=2 /LL=91977 /UG=Hs.91626 /DEF=Homo sapiens myozenin 3 (MYOZ3), mRNA. /PROD=myozenin 3 /FL=gb:AF480443.1 gb:NM_133371.1
1553071_a_at	10.2	A	13.6	A	12.6	A	4.3	A	15.4	A	13.9	A	56.6	A	12	A	7.2	A	9.2	A	12.8	A	10.5	A	gb:NM_133371.1 /DB_XREF=gi:19115961 /GEN=MYOZ3 /TID=Hs2.91626.1 /CNT=2 /FEA=FLmRNA /TIER=FL /STK=2 /LL=91977 /UG=Hs.91626 /DEF=Homo sapiens myozenin 3 (MYOZ3), mRNA. /PROD=myozenin 3 /FL=gb:AF480443.1 gb:NM_133371.1
1553072_at	44.8	A	70.8	A	40	A	52.1	A	10.5	A	12.6	A	25.9	A	8.8	A	32.6	A	111.3	A	23	A	10.1	A	gb:NM_138279.1 /DB_XREF=gi:19923712 /GEN=BNIP-S /TID=Hs2.58006.2 /CNT=2 /FEA=FLmRNA /TIER=FL /STK=2 /LL=149428 /UG=Hs.58006 /DEF=Homo sapiens BNIP-2 similar (BNIP-S), mRNA. /PROD=BNIP-Sbeta /FL=gb:NM_138279.1 gb:AY078984.1
1553074_at	112	A	92.4	A	7.6	A	32.7	A	11.5	A	8	A	29.4	A	13.8	A	9.6	A	23.7	A	8.8	A	2.5	A	gb:NM_080873.1 /DB_XREF=gi:18254473 /GEN=ASB11 /TID=Hs2.352183.1 /CNT=2 /FEA=FLmRNA /TIER=FL /STK=2 /LL=140456 /UG=Hs.352183 /DEF=Homo sapiens ankyrin repeat and SOCS box-containing 11 (ASB11), mRNA. /PROD=ankyrin repeat and SOCS box-containing protein11 /FL=gb:AF425642.1 gb:NM_080873.1
1553075_a_at	2.6	A	48.3	A	66.7	A	22.3	A	12.5	A	4.9	A	11	A	6.3	A	4.2	A	24.6	A	44.7	A	4.2	A	gb:AF548121.1 /DB_XREF=gi:24415876 /TID=Hs2.382068.14 /CNT=1 /FEA=mRNA /TIER=ConsEnd /STK=0 /LL=266553 /UG_GENE=MRDS1 /UG=Hs.382068 /UG_TITLE=MRDS1 /DEF=Homo sapiens orofacial clefting chromosomal breakpoint region 1 mRNA.
1553076_at	8.4	A	10.1	A	1.9	A	19.8	A	18.1	A	5.5	A	17.2	A	9.1	A	7.7	A	14.9	A	5.4	A	5.9	A	gb:NM_153003.1 /DB_XREF=gi:23308598 /TID=Hs2.382068.1 /CNT=2 /FEA=FLmRNA /TIER=FL /STK=2 /LL=266553 /UG_GENE=MRDS1 /UG=Hs.382068 /UG_TITLE=MRDS1 /DEF=Homo sapiens MRDS1 (MRDS1), mRNA. /FL=gb:AF520800.1 gb:NM_153003.1
1553077_at	6.3	A	54.2	A	6.6	A	5.9	A	28	A	10.6	A	112	A	8.9	A	29.3	A	17.7	A	10	A	27.4	A	gb:NM_148897.1 /DB_XREF=gi:22507404 /GEN=SDR-O /TID=Hs2.380178.1 /CNT=2 /FEA=FLmRNA /TIER=FL /STK=2 /LL=121214 /UG=Hs.380178 /DEF=Homo sapiens orphan short-chain dehydrogenase reductase (SDR-O), mRNA. /PROD=orphan short-chain dehydrogenase reductase /FL=gb:NM_148897.1 gb:AY044434.1
1553078_at	162.6	A	40.6	A	11.5	A	123.2	A	60.7	A	149.6	A	86.6	A	85.8	A	33.9	A	85.6	A	104	A	198.6	A	gb:NM_153445.1 /DB_XREF=gi:23592229 /GEN=JCG1 /TID=Hs2.351825.1 /CNT=2 /FEA=FLmRNA /TIER=FL /STK=2 /LL=120066 /UG=Hs.351825 /DEF=Homo sapiens olfactory receptor-like protein JCG1 (JCG1), mRNA. /PROD=olfactory receptor-like protein JCG1 /FL=gb:AF158377.1 gb:NM_153445.1
1553079_at	20.2	A	16.1	A	17.6	A	72	A	59.2	A	81.8	A	103.6	A	25.6	A	36.7	A	94.4	A	19.8	A	31	A	gb:NM_138700.1 /DB_XREF=gi:20162563 /TID=Hs2.356868.1 /CNT=2 /FEA=FLmRNA /TIER=FL /STK=2 /LL=135644 /UG_GENE=TRIM40 /UG=Hs.356868 /UG_TITLE=tripartite motif-containing 40 /DEF=Homo sapiens tripartite motif-containing 40 (TRIM40), mRNA. /FL=gb:AF489517.1 gb:NM_138700.1
1553080_at	47.4	A	68.5	A	83	A	55.5	A	99.1	M	42.3	A	224.9	A	27.6	A	55.8	A	11.3	A	100.3	A	42	A	gb:NM_173085.1 /DB_XREF=gi:27436856 /GEN=CSN1S2A /TID=Hs2.437164.1 /CNT=2 /FEA=FLmRNA /TIER=FL /STK=2 /LL=286828 /UG=Hs.437164 /DEF=Homo sapiens casein alpha s2-like A (CSN1S2A), mRNA. /PROD=alpha-S2-like casein A /FL=gb:AY154892.1 gb:NM_173085.1
1553081_at	122.4	A	58.9	A	152.7	A	38	A	38.4	A	153.8	A	205.5	A	98.7	A	47	A	70.2	A	114.3	A	109.5	A	gb:NM_080869.1 /DB_XREF=gi:20069857 /GEN=WFDC12 /TID=Hs2.352180.1 /CNT=2 /FEA=FLmRNA /TIER=FL /STK=2 /LL=128488 /UG=Hs.352180 /DEF=Homo sapiens WAP four-disulfide core domain 12 (WFDC12), mRNA. /PROD=WAP four-disulfide core domain 12 /FL=gb:NM_080869.1 gb:AY037803.1
1553082_at	6.5	A	15.8	A	30.7	A	3.7	A	5.1	A	18.6	A	31	A	4.1	A	15.6	A	6.2	A	5	A	4	A	gb:NM_144727.1 /DB_XREF=gi:21389516 /GEN=CRYGN /TID=Hs2.352152.1 /CNT=2 /FEA=FLmRNA /TIER=FL /STK=2 /LL=155051 /UG=Hs.352152 /DEF=Homo sapiens crystallin, gamma N (CRYGN), mRNA. /PROD=gammaN-crystallin variant /FL=gb:NM_144727.1 gb:AF445455.1
1553083_at	168.9	A	42	A	103.3	A	100.7	A	72.7	A	62.3	A	67.1	A	42.3	A	160.7	A	282.7	A	183.8	A	95.8	A	gb:NM_032363.1 /DB_XREF=gi:14150174 /TID=Hs2.334494.1 /CNT=2 /FEA=FLmRNA /TIER=FL /STK=2 /LL=84323 /UG_GENE=HEIL2 /UG=Hs.334494 /UG_TITLE=HEIL2 protein /DEF=Homo sapiens HEIL2 protein (HEIL2), mRNA. /FL=gb:AB027122.1 gb:NM_032363.1
1553084_at	92.3	A	93.1	A	6.3	A	59.6	A	39.4	A	107.8	A	90.2	A	38.4	A	56.6	A	20.1	A	64.3	A	76	A	gb:NM_139171.1 /DB_XREF=gi:21040260 /GEN=STARD6 /TID=Hs2.374669.1 /CNT=2 /FEA=FLmRNA /TIER=FL /STK=2 /LL=147323 /UG=Hs.374669 /DEF=Homo sapiens START domain containing 6 (STARD6), mRNA. /PROD=START domain containing protein 6 /FL=gb:NM_139171.1 gb:AF480305.1
1553086_at	3.2	A	12.6	A	3.8	A	18.5	A	10.5	A	65.1	A	157.7	A	6.6	A	24.2	A	29.1	A	41.5	A	8.9	A	gb:NM_144663.1 /DB_XREF=gi:21389542 /TID=Hs2.350556.1 /CNT=2 /FEA=FLmRNA /TIER=FL /STK=2 /LL=143501 /UG_GENE=NOV1 /UG=Hs.350556 /UG_TITLE=NOV1 /DEF=Homo sapiens NOV1 (NOV1), mRNA. /FL=gb:AF439154.1 gb:NM_144663.1
1553087_at	29.7	A	64.1	A	7.5	A	38.4	A	18.9	A	22.6	A	39.3	A	25.1	A	14.3	A	103.3	A	65.3	A	23.1	A	gb:NM_032362.1 /DB_XREF=gi:14150172 /TID=Hs2.334493.1 /CNT=2 /FEA=FLmRNA /TIER=FL /STK=2 /LL=84322 /UG_GENE=HEIL1 /UG=Hs.334493 /UG_TITLE=HEIL1 protein /DEF=Homo sapiens HEIL1 protein (HEIL1), mRNA. /FL=gb:AB027121.1 gb:NM_032362.1
1553088_a_at	314.6	P	278.2	P	237.5	P	310.3	P	266.8	P	524.9	P	218.8	A	301.8	P	382.8	A	255	P	342.8	P	369.7	P	gb:NM_138626.1 /DB_XREF=gi:20336324 /GEN=BCL2L11 /TID=Hs2.202657.5 /CNT=2 /FEA=FLmRNA /TIER=FL /STK=2 /LL=10018 /UG=Hs.202657 /DEF=Homo sapiens BCL2-like 11 (apoptosis facilitator) (BCL2L11), transcript variant 7, mRNA. /PROD=BCL2-like 11 isoform 7 /FL=gb:AB071198.1 gb:NM_138626.1
1553089_a_at	30.8	A	27.5	A	6.7	A	4.1	A	7.1	A	29.9	A	46.4	A	10.1	A	9.2	A	27.8	A	5	A	11	A	gb:NM_080736.1 /DB_XREF=gi:18379361 /GEN=WFDC2 /TID=Hs2.2719.5 /CNT=2 /FEA=FLmRNA /TIER=FL /STK=2 /LL=10406 /UG=Hs.2719 /DEF=Homo sapiens WAP four-disulfide core domain 2 (WFDC2), transcript variant 2, mRNA. /PROD=WAP four-disulfide core domain 2, isoform 2precursor /FL=gb:NM_080736.1 gb:AF330262.1
1553093_a_at	17.9	A	8.5	A	68.8	A	11.2	A	9.4	A	9.1	A	81.6	A	5.9	A	6	A	13.4	A	49.9	A	7	A	gb:NM_153323.2 /DB_XREF=gi:24475839 /GEN=DEFB120 /TID=Hs2.156845.1 /CNT=2 /FEA=FLmRNA /TIER=FL /STK=2 /LL=245933 /UG=Hs.156845 /DEF=Homo sapiens defensin, beta 120 (DEFB120), mRNA. /PROD=defensin, beta 120 /FL=gb:NM_153323.2 gb:AY122473.1
1553094_at	6.3	A	6.1	A	6.1	A	4.9	A	22.9	A	7.8	A	35.7	A	6.3	A	12	A	12.6	A	5.5	A	9.3	A	gb:NM_170685.1 /DB_XREF=gi:26449156 /GEN=PPT-C /TID=Hs2.437112.1 /CNT=2 /FEA=FLmRNA /TIER=FL /STK=2 /LL=255061 /UG=Hs.437112 /DEF=Homo sapiens preprotachykinin C (PPT-C), mRNA. /PROD=preprotachykinin C /FL=gb:NM_170685.1 gb:AF521560.1
1553096_s_at	622.3	P	449	P	561.7	P	304	P	387.6	P	735.3	P	586.5	A	465	P	417.2	P	552.1	P	559.6	P	466.1	A	gb:NM_138627.1 /DB_XREF=gi:20336326 /GEN=BCL2L11 /TID=Hs2.202657.7 /CNT=2 /FEA=FLmRNA /TIER=FL /STK=2 /LL=10018 /UG=Hs.202657 /DEF=Homo sapiens BCL2-like 11 (apoptosis facilitator) (BCL2L11), transcript variant 8, mRNA. /PROD=BCL2-like 11 isoform 8 /FL=gb:NM_138627.1 gb:AB071200.1
1553099_at	212	P	133.9	P	143.1	P	701.5	P	283.4	P	634.1	P	331.6	P	181.9	P	240.4	P	291.1	P	247	P	314.3	P	gb:NM_145702.1 /DB_XREF=gi:22209000 /GEN=TIGD1 /TID=Hs2.351348.1 /CNT=60 /FEA=FLmRNA /TIER=FL /STK=1 /LL=200765 /UG=Hs.351348 /DEF=Homo sapiens tigger transposable element derived 1 (TIGD1), mRNA. /PROD=tigger transposable element derived 1 /FL=gb:NM_145702.1
1553101_a_at	1813.6	P	2976.7	P	2615.9	P	1599.5	P	2821.1	P	1204.9	P	1391.3	P	2696.1	P	2042.1	P	1872.4	P	3619.8	P	1860.1	P	gb:NM_017758.1 /DB_XREF=gi:22726192 /TID=Hs2.130740.1 /CNT=116 /FEA=FLmRNA /TIER=FL /STK=1 /LL=54890 /UG_GENE=FLJ20308 /UG=Hs.130740 /UG_TITLE=hypothetical protein FLJ20308 /DEF=Homo sapiens hypothetical protein FLJ20308 (FLJ20308), mRNA. /FL=gb:NM_017758.1
1553102_a_at	8.7	A	51.4	A	16	A	83.3	A	9.8	A	8.2	A	26.5	A	5.6	A	10.5	A	10.2	A	17.7	A	9.2	A	gb:BC016647.1 /DB_XREF=gi:19116199 /TID=Hs2.209100.1 /CNT=88 /FEA=FLmRNA /TIER=FL /STK=1 /LL=26112 /UG_GENE=DKFZP434C171 /UG=Hs.209100 /DEF=Homo sapiens, clone MGC:16844 IMAGE:4342371, mRNA, complete cds. /PROD=Unknown (protein for MGC:16844) /FL=gb:BC016647.1 gb:NM_015621.1
1553103_at	1215.8	P	1094.7	P	894.2	P	1467.4	P	1564.5	P	1150	P	1119	P	1204.7	P	844.4	P	842	P	311.8	P	2230.7	P	gb:NM_147134.1 /DB_XREF=gi:22212926 /GEN=NFX1 /TID=Hs2.3187.2 /CNT=80 /FEA=FLmRNA /TIER=FL /STK=1 /LL=4799 /UG=Hs.3187 /DEF=Homo sapiens nuclear transcription factor, X-box binding 1 (NFX1), transcript variant 3, mRNA. /PROD=nuclear transcription factor, X-box binding 1isoform 3 /FL=gb:NM_147134.1
1553105_s_at	116.3	A	279.9	A	742.2	P	5.9	A	320.5	A	642.5	P	562.8	P	23.1	A	152	A	694.1	P	200.8	A	1411	P	gb:NM_001943.1 /DB_XREF=gi:4503402 /GEN=DSG2 /TID=Hs2.359784.1 /CNT=80 /FEA=FLmRNA /TIER=FL /STK=1 /LL=1829 /UG=Hs.359784 /DEF=Homo sapiens desmoglein 2 (DSG2), mRNA. /PROD=desmoglein 2 preproprotein /FL=gb:NM_001943.1
1553106_at	565.6	P	582.5	P	386.7	P	423.7	P	383.7	P	214.6	P	356.2	P	189.3	P	266.2	P	312.2	P	381.9	P	239.5	P	gb:NM_152409.1 /DB_XREF=gi:22748866 /TID=Hs2.406549.1 /CNT=63 /FEA=FLmRNA /TIER=FL /STK=1 /LL=134553 /UG_GENE=FLJ37562 /UG=Hs.406549 /UG_TITLE=hypothetical protein FLJ37562 /DEF=Homo sapiens hypothetical protein FLJ37562 (FLJ37562), mRNA. /FL=gb:NM_152409.1
1553107_s_at	415.8	P	474.8	P	464.6	P	313.4	P	493.9	P	419	P	333.4	P	206	P	338.8	P	391.3	P	348.5	P	307.7	P	gb:BF436799 /DB_XREF=gi:11449114 /DB_XREF=7p64d01.x1 /CLONE=IMAGE:3650712 /TID=Hs2.406549.1 /CNT=63 /FEA=FLmRNA /TIER=Stack /STK=8 /LL=134553 /UG_GENE=FLJ37562 /UG=Hs.406549 /UG_TITLE=hypothetical protein FLJ37562 /FL=gb:NM_152409.1
1553108_at	335	P	378.7	P	257.6	P	229.8	P	222.6	P	297.8	P	332.9	P	166.5	P	243.1	P	250	P	344.1	P	151.9	P	gb:AW068615 /DB_XREF=gi:6023613 /DB_XREF=cn21e04.y1 /CLONE=NHTBC_cn21e04 (random) /TID=Hs2.406549.1 /CNT=63 /FEA=FLmRNA /TIER=ConsEnd /STK=0 /LL=134553 /UG_GENE=FLJ37562 /UG=Hs.406549 /UG_TITLE=hypothetical protein FLJ37562 /FL=gb:NM_152409.1
1553111_a_at	226.4	P	174.2	P	104.8	P	64.5	P	97.2	A	182.3	P	368.8	A	142	P	122.1	P	177.6	P	99.9	A	185.9	P	gb:NM_152903.1 /DB_XREF=gi:23097251 /TID=Hs2.112198.1 /CNT=33 /FEA=FLmRNA /TIER=FL /STK=1 /LL=89890 /UG_GENE=DKFZp547E1912 /UG=Hs.112198 /UG_TITLE=hypothetical protein DKFZp547E1912 /DEF=Homo sapiens hypothetical protein DKFZp547E1912 (DKFZp547E1912), mRNA. /FL=gb:NM_152903.1
1553112_s_at	540	P	611.7	P	473.1	P	557.5	P	397.8	P	659.5	P	481	P	575.4	P	524.1	P	413.5	P	278.6	P	409.3	P	gb:NM_001260.1 /DB_XREF=gi:4502744 /GEN=CDK8 /TID=Hs2.397734.1 /CNT=32 /FEA=FLmRNA /TIER=FL /STK=1 /LL=1024 /UG=Hs.397734 /DEF=Homo sapiens cyclin-dependent kinase 8 (CDK8), mRNA. /PROD=cyclin-dependent kinase 8 /FL=gb:NM_001260.1
1553113_s_at	446.5	P	720.2	P	584.3	P	618.2	P	328.9	P	639.3	P	481.2	P	674.3	P	524.3	P	437.2	P	428.9	P	695.6	P	gb:BF700678 /DB_XREF=gi:11986086 /DB_XREF=602128666F1 /CLONE=IMAGE:4285385 /TID=Hs2.397734.1 /CNT=32 /FEA=FLmRNA /TIER=ConsEnd /STK=0 /LL=1024 /UG_GENE=CDK8 /UG=Hs.397734 /UG_TITLE=cyclin-dependent kinase 8 /FL=gb:NM_001260.1
1553114_a_at	139.3	A	335.5	A	546.7	A	245	A	169.2	A	412.3	A	87.2	A	225.6	A	58.3	A	37.4	A	183.6	A	207	A	gb:NM_005975.2 /DB_XREF=gi:27886594 /GEN=PTK6 /TID=Hs2.51133.1 /CNT=39 /FEA=FLmRNA /TIER=FL /STK=1 /LL=5753 /UG=Hs.51133 /DEF=Homo sapiens PTK6 protein tyrosine kinase 6 (PTK6), mRNA. /PROD=PTK6 protein tyrosine kinase 6 /FL=gb:NM_005975.2
1553115_at	24.7	A	49	A	35.3	A	24.2	A	170.2	A	72.7	A	87.6	A	26.4	A	94.2	A	101.7	A	18.8	A	24	A	gb:AF358135.1 /DB_XREF=gi:14211713 /GEN=NKD1 /TID=Hs2.298434.1 /CNT=31 /FEA=FLmRNA /TIER=FL /STK=1 /LL=85407 /UG=Hs.298434 /DEF=Homo sapiens naked cuticle-1 (NKD1) mRNA, complete cds. /PROD=naked cuticle-1 /FL=gb:AF358135.1 gb:AY061883.1 gb:AB062886.1 gb:NM_033119.2
1553117_a_at	419.9	P	454.3	P	472.8	P	545.7	P	1094.1	P	221.4	A	196.4	A	529.6	P	616.7	P	807.5	P	408.9	P	406.5	P	gb:NM_007271.1 /DB_XREF=gi:6005813 /GEN=STK38 /TID=Hs2.8724.1 /CNT=37 /FEA=FLmRNA /TIER=FL /STK=1 /LL=11329 /UG=Hs.8724 /DEF=Homo sapiens serinethreonine kinase 38 (STK38), mRNA. /PROD=serinethreonine kinase 38 /FL=gb:NM_007271.1
1553118_at	1288.3	P	1017.5	P	1248.7	P	1591.8	P	702.5	P	747.2	P	790	P	2028.6	P	1018.5	P	841.3	P	1231.2	P	593.9	M	gb:NM_053055.1 /DB_XREF=gi:16596699 /GEN=CTMP /TID=Hs2.293691.1 /CNT=22 /FEA=FLmRNA /TIER=FL /STK=1 /LL=117145 /UG=Hs.293691 /DEF=Homo sapiens C-terminal modulator protein (CTMP), mRNA. /PROD=C-terminal modulator protein /FL=gb:NM_053055.1
1553120_at	172.2	P	169.8	P	57.7	A	102.4	P	63.7	M	73	P	135.1	A	228.4	P	225.6	P	365	P	174	P	240	P	gb:NM_022111.2 /DB_XREF=gi:21735568 /GEN=CLSPN /TID=Hs2.175613.1 /CNT=44 /FEA=FLmRNA /TIER=FL /STK=1 /LL=63967 /UG=Hs.175613 /DEF=Homo sapiens claspin homolog (Xenopus laevis) (CLSPN), mRNA. /PROD=claspin /FL=gb:NM_022111.2
1553122_s_at	258.9	P	229.9	P	164.3	P	166.7	P	204.5	P	115.2	P	235.5	P	115.7	P	214.6	P	186.5	P	268.4	P	143.7	P	gb:NM_021163.2 /DB_XREF=gi:16306485 /GEN=RBAK /TID=Hs2.396178.1 /CNT=28 /FEA=FLmRNA /TIER=FL /STK=1 /LL=57786 /UG=Hs.396178 /DEF=Homo sapiens RB-associated KRAB repressor (RBAK), mRNA. /PROD=RB-associated KRAB repressor /FL=gb:NM_021163.2
1553123_at	221.5	A	134.3	A	69.1	A	51.6	A	19.5	A	125.1	A	343.8	A	74.5	A	123.8	P	69.9	A	116.6	A	111.4	A	gb:NM_173636.1 /DB_XREF=gi:27735003 /TID=Hs2.326012.1 /CNT=20 /FEA=FLmRNA /TIER=FL /STK=1 /LL=284403 /UG_GENE=FLJ33298 /UG=Hs.326012 /UG_TITLE=hypothetical protein FLJ33298 /DEF=Homo sapiens hypothetical protein FLJ33298 (FLJ33298), mRNA. /FL=gb:NM_173636.1
1553125_x_at	126.5	A	150.7	A	40.2	A	86	A	22.4	A	47.3	A	142	A	74.9	M	80.8	A	103	A	39.7	A	107.7	A	gb:NM_173636.1 /DB_XREF=gi:27735003 /TID=Hs2.326012.1 /CNT=20 /FEA=FLmRNA /TIER=FL /STK=1 /LL=284403 /UG_GENE=FLJ33298 /UG=Hs.326012 /UG_TITLE=hypothetical protein FLJ33298 /DEF=Homo sapiens hypothetical protein FLJ33298 (FLJ33298), mRNA. /FL=gb:NM_173636.1
1553126_a_at	35.3	A	52	A	30.8	A	29.1	A	14.8	A	22.2	A	41.6	A	11	A	41.3	A	31.7	A	133.4	P	26.7	A	gb:NM_152725.1 /DB_XREF=gi:22749432 /TID=Hs2.350895.1 /CNT=15 /FEA=FLmRNA /TIER=FL /STK=1 /LL=221074 /UG_GENE=FLJ30499 /UG=Hs.350895 /UG_TITLE=hypothetical protein FLJ30499 /DEF=Homo sapiens hypothetical protein FLJ30499 (FLJ30499), mRNA. /FL=gb:NM_152725.1
1553127_a_at	63.4	A	104	M	8.1	A	2.1	A	14	A	33.2	A	156.2	A	53.5	A	53.3	A	10.3	A	34.4	A	89.7	A	gb:BC033791.1 /DB_XREF=gi:22832843 /TID=Hs2.263373.1 /CNT=27 /FEA=FLmRNA /TIER=FL /STK=1 /LL=165918 /UG_GENE=FLJ35794 /UG=Hs.263373 /DEF=Homo sapiens, clone MGC:45398 IMAGE:5163887, mRNA, complete cds. /PROD=Unknown (protein for MGC:45398) /FL=gb:NM_152617.1 gb:BC033791.1
1553129_at	2.5	A	6.6	A	42.4	A	18.6	A	14	A	60.1	A	109.1	A	26	A	26	A	71.2	A	4.2	A	49.4	P	gb:NM_024500.2 /DB_XREF=gi:21361988 /GEN=POLYDOM /TID=Hs2.271350.1 /CNT=48 /FEA=FLmRNA /TIER=FL /STK=1 /LL=79987 /UG=Hs.271350 /DEF=Homo sapiens likely ortholog of mouse polydom (POLYDOM), mRNA. /PROD=likely ortholog of mouse polydom /FL=gb:NM_024500.2
1553130_at	102.4	A	147.8	A	28.6	A	397.2	A	58.8	A	189.1	A	190.5	A	12.6	A	27	A	20.1	A	61.2	A	9.8	A	gb:NM_152340.1 /DB_XREF=gi:23097312 /TID=Hs2.379220.1 /CNT=28 /FEA=FLmRNA /TIER=FL /STK=1 /LL=124216 /UG_GENE=FLJ39075 /UG=Hs.379220 /UG_TITLE=hypothetical protein FLJ39075 /DEF=Homo sapiens hypothetical protein FLJ39075 (FLJ39075), mRNA. /FL=gb:NM_152340.1
1553131_a_at	52.3	A	59.4	A	182.6	A	6.8	A	135.9	A	531.1	P	71.3	A	218.1	A	47.8	A	153.5	A	44.8	A	183.7	A	gb:D78260.1 /DB_XREF=gi:1065568 /TID=Hs2.243987.1 /CNT=25 /FEA=FLmRNA /TIER=FL /STK=1 /LL=2626 /UG_GENE=GATA4 /UG=Hs.243987 /DEF=Homo sapiens mRNA for GATA-4 transcription factor, complete cds. /PROD=GATA-4 transcription factor /FL=gb:NM_002052.1 gb:L34357.1 gb:D78260.1
1553132_a_at	9.1	A	1.5	A	3.3	A	3.5	A	3.7	A	161.3	P	35.7	A	3.9	A	24.1	A	8.9	A	67.6	A	1.7	A	gb:NM_152332.1 /DB_XREF=gi:22748724 /TID=Hs2.57787.1 /CNT=23 /FEA=FLmRNA /TIER=FL /STK=1 /LL=123036 /UG_GENE=C14orf47 /UG=Hs.57787 /UG_TITLE=chromosome 14 open reading frame 47 /DEF=Homo sapiens chromosome 14 open reading frame 47 (C14orf47), mRNA. /FL=gb:NM_152332.1
1553133_at	178.5	A	169	A	89.8	A	9.2	A	45.6	A	127.9	A	92.9	A	86.3	A	52.7	A	142.8	A	107.9	P	48.7	A	gb:BC020851.1 /DB_XREF=gi:18088597 /TID=Hs2.23607.1 /CNT=19 /FEA=FLmRNA /TIER=FL /STK=1 /LL=203228 /UG_GENE=MGC23980 /UG=Hs.23607 /DEF=Homo sapiens, clone MGC:23980 IMAGE:4772831, mRNA, complete cds. /PROD=Unknown (protein for MGC:23980) /FL=gb:BC020851.1 gb:NM_145005.2
1553134_s_at	57.4	A	8.2	A	35.7	A	20.4	A	2.1	A	51.4	A	17.9	A	49.1	A	51.1	A	4.7	A	7.5	A	26.7	A	gb:BC020851.1 /DB_XREF=gi:18088597 /TID=Hs2.23607.1 /CNT=19 /FEA=FLmRNA /TIER=FL /STK=1 /LL=203228 /UG_GENE=MGC23980 /UG=Hs.23607 /DEF=Homo sapiens, clone MGC:23980 IMAGE:4772831, mRNA, complete cds. /PROD=Unknown (protein for MGC:23980) /FL=gb:BC020851.1 gb:NM_145005.2
1553136_at	175.9	A	215.4	A	318.9	A	169.5	M	184.2	A	321.6	A	114.5	A	169.6	A	95.2	A	228.9	A	234.8	A	41.2	A	gb:NM_152387.1 /DB_XREF=gi:22748828 /TID=Hs2.379185.1 /CNT=13 /FEA=FLmRNA /TIER=FL /STK=1 /LL=130535 /UG_GENE=FLJ31322 /UG=Hs.379185 /UG_TITLE=hypothetical protein FLJ31322 /DEF=Homo sapiens hypothetical protein FLJ31322 (FLJ31322), mRNA. /FL=gb:NM_152387.1
1553137_s_at	316.9	M	314.6	P	251.4	P	304.2	P	193.1	A	86.6	A	87.8	A	240	P	222.6	P	150.2	A	173.4	P	171.1	M	gb:AF028008.1 /DB_XREF=gi:3334452 /GEN=TIEG2 /TID=Hs2.408442.1 /CNT=22 /FEA=FLmRNA /TIER=FL /STK=1 /LL=8462 /UG=Hs.408442 /DEF=Homo sapiens SP1-like zinc finger transcription factor (TIEG2) mRNA, complete cds. /PROD=SP1-like zinc finger transcription factor /FL=gb:AF272830.1 gb:NM_003597.2 gb:AF028008.1
1553138_a_at	5.9	A	8.9	A	4.3	A	2.3	A	128.1	A	12.5	A	18.9	A	45.2	A	155	M	51.6	A	7.9	A	24.6	A	gb:NM_152363.1 /DB_XREF=gi:22748782 /TID=Hs2.379097.1 /CNT=13 /FEA=FLmRNA /TIER=FL /STK=1 /LL=126549 /UG_GENE=FLJ39369 /UG=Hs.379097 /UG_TITLE=hypothetical protein FLJ39369 /DEF=Homo sapiens hypothetical protein FLJ39369 (FLJ39369), mRNA. /FL=gb:NM_152363.1
1553139_s_at	226	M	213.5	A	578.3	P	124.7	A	510.5	P	83	A	765.8	A	189	A	331.2	A	422.8	M	158.8	A	417.1	P	gb:NM_017514.1 /DB_XREF=gi:8923792 /GEN=PLXN3 /TID=Hs2.436165.1 /CNT=28 /FEA=FLmRNA /TIER=FL /STK=1 /LL=55558 /UG=Hs.436165 /DEF=Homo sapiens likely ortholog of mouse plexin 3 (PLXN3), mRNA. /PROD=SEX gene /FL=gb:NM_017514.1
1553140_at	83.7	A	42.8	A	17.9	A	54.1	A	67.3	A	49	A	71.9	A	49	A	11.8	A	98.5	A	54.6	P	57	A	gb:NM_014100.2 /DB_XREF=gi:20590770 /TID=Hs2.196972.1 /CNT=21 /FEA=FLmRNA /TIER=FL /STK=1 /LL=29019 /UG_GENE=PRO1770 /UG=Hs.196972 /UG_TITLE=PRO1770 protein /DEF=Homo sapiens PRO1770 protein (PRO1770), mRNA. /FL=gb:NM_014100.2
1553141_at	249.4	A	313.6	M	101.9	A	252.6	P	404.8	P	156.8	A	418	P	60.9	A	111.7	A	84.3	A	191.3	A	127.5	P	gb:BC035749.1 /DB_XREF=gi:23242932 /TID=Hs2.210586.1 /CNT=19 /FEA=FLmRNA /TIER=FL /STK=1 /LL=144811 /UG_GENE=FLJ38725 /UG=Hs.210586 /DEF=Homo sapiens, clone MGC:46349 IMAGE:5750179, mRNA, complete cds. /PROD=Unknown (protein for MGC:46349) /FL=gb:BC035749.1 gb:NM_153218.1
1553142_at	106.5	P	155.6	P	66.7	A	125.3	P	244.9	P	101.2	P	309.7	P	57.8	P	63.1	P	43.7	A	53.7	P	60.5	A	gb:NM_153218.1 /DB_XREF=gi:23397476 /TID=Hs2.210586.1 /CNT=19 /FEA=FLmRNA /TIER=FL /STK=1 /LL=144811 /UG_GENE=FLJ38725 /UG=Hs.210586 /UG_TITLE=hypothetical protein FLJ38725 /DEF=Homo sapiens hypothetical protein FLJ38725 (FLJ38725), mRNA. /FL=gb:BC035749.1 gb:NM_153218.1
1553145_at	129.4	A	117.6	A	195.1	P	128.3	P	92	A	181.1	P	252.2	A	104.9	M	76.6	A	188.3	M	149.6	A	188.7	P	gb:BC010030.1 /DB_XREF=gi:14603120 /TID=Hs2.303666.1 /CNT=19 /FEA=FLmRNA /TIER=FL /STK=1 /LL=202020 /UG_GENE=FLJ39653 /UG=Hs.303666 /DEF=Homo sapiens, clone MGC:19686 IMAGE:3503500, mRNA, complete cds. /PROD=Unknown (protein for MGC:19686) /FL=gb:NM_152684.1 gb:BC010030.1
1553146_at	42.7	A	4.5	A	10.7	A	12.1	A	11.2	A	11	A	123.2	A	11.7	A	7.2	A	10.3	A	18.2	A	14.8	A	gb:NM_152539.1 /DB_XREF=gi:22749116 /TID=Hs2.351465.1 /CNT=14 /FEA=FLmRNA /TIER=FL /STK=1 /LL=152405 /UG_GENE=FLJ32859 /UG=Hs.351465 /UG_TITLE=hypothetical protein FLJ32859 /DEF=Homo sapiens hypothetical protein FLJ32859 (FLJ32859), mRNA. /FL=gb:NM_152539.1
1553147_at	3.4	A	5	A	9.9	A	6.3	A	4.9	A	78.5	A	26.1	A	5.4	A	3.3	A	12.6	A	5.5	A	15.9	A	gb:NM_145000.1 /DB_XREF=gi:21450714 /TID=Hs2.350595.1 /CNT=11 /FEA=FLmRNA /TIER=FL /STK=1 /LL=202151 /UG_GENE=FLJ25422 /UG=Hs.350595 /UG_TITLE=hypothetical protein FLJ25422 /DEF=Homo sapiens hypothetical protein FLJ25422 (FLJ25422), mRNA. /FL=gb:NM_145000.1
1553148_a_at	394.6	P	408.8	P	372.7	P	276.2	P	509.2	P	393.4	P	1341.1	P	289.3	P	1259.1	P	417.4	P	804.8	P	323.9	P	gb:R75838 /DB_XREF=gi:850520 /DB_XREF=yi59f10.r1 /CLONE=IMAGE:143563 /TID=Hs2.283881.1 /CNT=39 /FEA=FLmRNA /TIER=ConsEnd /STK=0 /LL=23161 /UG_GENE=SNX13 /UG=Hs.283881 /UG_TITLE=sorting nexin 13 /FL=gb:AF420470.1 gb:NM_015132.2
1553150_at	120.1	P	69.8	P	819.1	P	222.2	P	283.7	P	274.8	P	48	A	113.8	P	193.1	P	301.1	P	324.5	P	96.3	P	gb:NM_153042.1 /DB_XREF=gi:23308564 /TID=Hs2.237691.1 /CNT=22 /FEA=FLmRNA /TIER=FL /STK=1 /LL=221656 /UG_GENE=FLJ34109 /UG=Hs.237691 /UG_TITLE=hypothetical protein FLJ34109 /DEF=Homo sapiens hypothetical protein FLJ34109 (FLJ34109), mRNA. /FL=gb:NM_153042.1
1553151_at	105	A	223.6	P	28.3	A	60.4	A	1140.6	P	50	A	11.9	A	433.9	P	89.4	A	12.3	A	532.4	P	7.7	A	gb:AY079172.1 /DB_XREF=gi:24209681 /GEN=ATP6V0D2 /TID=Hs2.130017.1 /CNT=14 /FEA=FLmRNA /TIER=FL /STK=1 /LL=245972 /UG=Hs.130017 /DEF=Homo sapiens vacuolar H+ ATPase d2 subunit (ATP6V0D2) mRNA, complete cds. /PROD=vacuolar H+ ATPase d2 subunit /FL=gb:NM_152565.1 gb:AY079172.1
1553153_at	331	P	409.9	P	159.2	A	190.4	P	843.9	P	340.1	A	254.2	A	636.9	P	624.3	M	326.2	P	803.8	P	419.8	P	gb:NM_152565.1 /DB_XREF=gi:22749164 /GEN=ATP6V0D2 /TID=Hs2.130017.1 /CNT=14 /FEA=FLmRNA /TIER=FL /STK=1 /LL=245972 /UG=Hs.130017 /DEF=Homo sapiens ATPase, H+ transporting, lysosomal 38kDa, V0 subunit d isoform 2 (ATP6V0D2), mRNA. /PROD=ATPase, H+ transporting, lysosomal 38kDa, V0subunit d isoform 2 /FL=gb:NM_152565.1 gb:AY079172.1
1553155_x_at	205.4	P	248.3	P	102.8	A	105.9	P	516.3	P	83.3	A	157.4	A	392.2	P	205	P	189.6	P	585.4	P	111.2	M	gb:NM_152565.1 /DB_XREF=gi:22749164 /GEN=ATP6V0D2 /TID=Hs2.130017.1 /CNT=14 /FEA=FLmRNA /TIER=FL /STK=1 /LL=245972 /UG=Hs.130017 /DEF=Homo sapiens ATPase, H+ transporting, lysosomal 38kDa, V0 subunit d isoform 2 (ATP6V0D2), mRNA. /PROD=ATPase, H+ transporting, lysosomal 38kDa, V0subunit d isoform 2 /FL=gb:NM_152565.1 gb:AY079172.1
1553156_at	18.9	A	27.1	A	5.7	A	13.6	A	15.1	A	10.1	A	20.6	A	5.1	A	8.7	A	15.7	A	9	A	19.3	A	gb:AB055704.1 /DB_XREF=gi:15146349 /GEN=LHx4 /TID=Hs2.152082.1 /CNT=12 /FEA=FLmRNA /TIER=FL /STK=1 /LL=89884 /UG=Hs.152082 /DEF=Homo sapiens LHx4 mRNA for LIM homeobox 4 transcript variant, complete cds. /PROD=LIM homeobox 4 transcript variant /FL=gb:AB055703.1 gb:AF282899.1 gb:NM_033343.1 gb:AY053457.1 gb:AF179849.1 gb:BC011759.1 gb:AB055704.1
1553157_at	140	M	94.1	A	76.3	A	133.6	P	165.7	P	75.6	A	202	A	71.1	A	83.9	A	60.5	A	111	P	116.3	A	gb:AB055703.1 /DB_XREF=gi:15146347 /GEN=LHx4 /TID=Hs2.152082.1 /CNT=12 /FEA=FLmRNA /TIER=FL /STK=1 /LL=89884 /UG=Hs.152082 /DEF=Homo sapiens LHx4 mRNA for LIM homeobox 4, complete cds. /PROD=LIM homeobox 4 /FL=gb:AB055703.1 gb:AF282899.1 gb:NM_033343.1 gb:AY053457.1 gb:AF179849.1 gb:BC011759.1 gb:AB055704.1
1553158_at	299.4	P	194.6	P	450.9	P	315.4	P	299.1	P	169.9	P	169.2	A	196.8	P	787.5	P	354.8	P	271.9	P	421.3	P	gb:AY099509.1 /DB_XREF=gi:21360365 /TID=Hs2.334526.1 /CNT=11 /FEA=FLmRNA /TIER=FL /STK=1 /LL=84984 /UG_GENE=MGC14126 /UG=Hs.334526 /DEF=Homo sapiens HSD5 mRNA, complete cds. /PROD=HSD5 /FL=gb:BC007827.1 gb:AY099509.1 gb:NM_032898.1
1553159_at	38	A	140.3	A	23.4	A	100.7	A	39.2	A	26.5	A	64	A	88.1	A	60.8	A	155.8	A	35.2	A	23.9	A	gb:NM_003777.1 /DB_XREF=gi:16507234 /GEN=DNAH11 /TID=Hs2.349084.1 /CNT=14 /FEA=FLmRNA /TIER=FL /STK=1 /LL=8701 /UG=Hs.349084 /DEF=Homo sapiens dynein, axonemal, heavy polypeptide 11 (DNAH11), mRNA. /PROD=dynein, axonemal, heavy polypeptide 11 /FL=gb:NM_003777.1
1553162_x_at	362.3	M	442.9	P	290.4	A	387.4	P	726.5	P	344.5	P	490.4	M	333.7	P	402.4	P	483	P	367.9	P	535	P	gb:NM_144692.1 /DB_XREF=gi:21389596 /TID=Hs2.156942.1 /CNT=13 /FEA=FLmRNA /TIER=FL /STK=1 /LL=148137 /UG_GENE=LOC148137 /UG=Hs.156942 /UG_TITLE=hypothetical protein BC017947 /DEF=Homo sapiens hypothetical protein BC017947 (LOC148137), mRNA. /FL=gb:NM_144692.1
1553163_at	53.7	A	281.3	A	162	A	237.6	M	32.9	A	209.4	A	138.7	A	30.1	A	239.8	A	103.1	A	111	A	225.2	A	gb:NM_138430.2 /DB_XREF=gi:21702734 /GEN=ARH2 /TID=Hs2.98669.1 /CNT=13 /FEA=FLmRNA /TIER=FL /STK=1 /LL=113622 /UG=Hs.98669 /DEF=Homo sapiens ADP-ribosyl-hydrolase (ARH2), mRNA. /PROD=ADP-ribosyl-hydrolase /FL=gb:NM_138430.2
1553165_at	13	A	76.2	A	31.4	A	79	A	53.8	A	4.1	A	214.8	A	131.1	A	45.7	A	106.7	A	50	A	112.4	A	gb:NM_080551.1 /DB_XREF=gi:18105001 /GEN=AP1GBP1 /TID=Hs2.15384.3 /CNT=10 /FEA=FLmRNA /TIER=FL /STK=1 /LL=11276 /UG=Hs.15384 /DEF=Homo sapiens AP1 gamma subunit binding protein 1 (AP1GBP1), transcript variant 3, mRNA. /PROD=AP1 gamma subunit binding protein 1 isoform b /FL=gb:NM_080551.1
1553166_at	161.5	A	42.4	A	28.4	A	163.6	A	187.1	A	171.8	A	61.1	A	88.1	A	335.6	P	186	A	174.9	A	257.6	P	gb:NM_144985.1 /DB_XREF=gi:21450686 /TID=Hs2.350611.1 /CNT=10 /FEA=FLmRNA /TIER=FL /STK=1 /LL=196887 /UG_GENE=FLJ25193 /UG=Hs.350611 /UG_TITLE=hypothetical protein FLJ25193 /DEF=Homo sapiens hypothetical protein FLJ25193 (FLJ25193), mRNA. /FL=gb:NM_144985.1
1553167_a_at	194.7	P	209.9	P	303.9	P	230.9	P	239.2	P	216.6	P	250.4	P	111.8	P	148.6	P	188.2	P	124.7	P	67.5	P	gb:BC023539.1 /DB_XREF=gi:23273769 /TID=Hs2.161436.2 /CNT=10 /FEA=FLmRNA /TIER=FL /STK=1 /LL=51091 /UG_GENE=SLALP /UG=Hs.161436 /DEF=Homo sapiens, soluble liver antigenliver pancreas antigen, clone MGC:14307 IMAGE:4138072, mRNA, complete cds. /PROD=soluble liver antigenliver pancreas antigen /FL=gb:NM_016955.1 gb:AF146396.2 gb:BC023539.1
1553168_at	220.7	A	184.1	A	45.9	A	137	A	222.4	A	64.5	A	122	A	59.6	A	144.7	A	43.9	A	145.4	A	95	A	gb:NM_002088.2 /DB_XREF=gi:17864085 /GEN=GRIK5 /TID=Hs2.249141.1 /CNT=19 /FEA=FLmRNA /TIER=FL /STK=1 /LL=2901 /UG=Hs.249141 /DEF=Homo sapiens glutamate receptor, ionotropic, kainate 5 (GRIK5), mRNA. /PROD=glutamate receptor, ionotropic, kainate 5 /FL=gb:NM_002088.2
1553169_at	14.4	A	10.2	A	11.4	A	8.7	A	26.5	A	13.6	A	170.3	A	10.2	A	8.3	A	18	A	7.4	A	6.6	A	gb:BC019612.1 /DB_XREF=gi:18044587 /TID=Hs2.331960.1 /CNT=16 /FEA=FLmRNA /TIER=FL /STK=1 /LL=164312 /UG_GENE=MGC25027 /UG=Hs.331960 /DEF=Homo sapiens, clone MGC:25027 IMAGE:4470395, mRNA, complete cds. /PROD=Unknown (protein for MGC:25027) /FL=gb:BC027720.1 gb:NM_152611.1 gb:BC019612.1
1553171_x_at	52.6	A	18	A	43.3	A	6.1	A	74.1	A	66.7	A	118.1	A	40.6	A	30.9	A	7.3	A	45.9	A	46.9	A	gb:BC019612.1 /DB_XREF=gi:18044587 /TID=Hs2.331960.1 /CNT=16 /FEA=FLmRNA /TIER=FL /STK=1 /LL=164312 /UG_GENE=MGC25027 /UG=Hs.331960 /DEF=Homo sapiens, clone MGC:25027 IMAGE:4470395, mRNA, complete cds. /PROD=Unknown (protein for MGC:25027) /FL=gb:BC027720.1 gb:NM_152611.1 gb:BC019612.1
1553172_at	407.1	P	494.2	P	438.8	P	1206.4	P	573.9	P	471	P	719.5	P	460.3	P	451.8	P	486.6	P	424.8	P	536.9	P	gb:NM_015694.1 /DB_XREF=gi:23821012 /TID=Hs2.119175.1 /CNT=16 /FEA=FLmRNA /TIER=FL /STK=1 /LL=27153 /UG_GENE=KIAA1285 /UG=Hs.119175 /UG_TITLE=KIAA1285 protein /DEF=Homo sapiens KIAA1285 protein (KIAA1285), mRNA. /FL=gb:NM_015694.1
1553174_at	33.3	A	20.2	A	17.9	A	18.2	A	19.3	A	24.9	A	39.7	A	23.7	A	52.4	A	13.4	A	29.2	A	17.7	A	gb:NM_020433.2 /DB_XREF=gi:21704280 /GEN=JPH2 /TID=Hs2.134594.1 /CNT=15 /FEA=FLmRNA /TIER=FL /STK=1 /LL=57158 /UG=Hs.134594 /DEF=Homo sapiens junctophilin 2 (JPH2), mRNA. /PROD=junctophilin 2 /FL=gb:NM_020433.2
1553175_s_at	49.4	A	100.5	A	95.6	A	187.2	A	153.8	A	5.9	A	61.6	A	54.1	A	21.5	A	212.8	P	120.6	A	33	A	gb:AB015656.1 /DB_XREF=gi:5138965 /TID=Hs2.121852.1 /CNT=13 /FEA=FLmRNA /TIER=FL /STK=1 /LL=8654 /UG_GENE=PDE5A /UG=Hs.121852 /DEF=Homo sapiens mRNA for cGMP-binding cGMP specific phosphodiesterase 5A2, complete cds. /PROD=cGMP-binding cGMP specific phosphodiesterase5A2 /FL=gb:AB015656.1 gb:NM_033430.1 gb:NM_001083.2 gb:AF043731.1
1553176_at	28.6	A	80.1	A	70	A	14.4	A	98.3	A	84.5	A	197.9	A	23.9	A	47.4	A	75.7	A	9.4	A	49.9	A	gb:AF403479.1 /DB_XREF=gi:16611777 /TID=Hs2.350581.1 /CNT=11 /FEA=FLmRNA /TIER=FL /STK=1 /LL=117157 /UG_GENE=EAT2 /UG=Hs.350581 /DEF=Homo sapiens EWSFLI1 activated transcript 2 protein mRNA, complete cds. /PROD=EWSFLI1 activated transcript 2 protein /FL=gb:AF484964.1 gb:NM_053282.1 gb:AF256653.1 gb:BC022407.1 gb:AF403479.1
1553177_at	9.9	A	77.1	A	19.9	A	61.4	A	176.9	P	73.1	A	133.6	A	44.5	A	41.4	A	107.4	A	14.1	A	101.2	A	gb:BC022407.1 /DB_XREF=gi:18490408 /TID=Hs2.350581.1 /CNT=11 /FEA=FLmRNA /TIER=FL /STK=1 /LL=117157 /UG_GENE=EAT2 /UG=Hs.350581 /DEF=Homo sapiens, SH2 domain-containing molecule EAT2, clone MGC:24157 IMAGE:4717041, mRNA, complete cds. /PROD=SH2 domain-containing molecule EAT2 /FL=gb:AF484964.1 gb:NM_053282.1 gb:AF256653.1 gb:BC022407.1 gb:AF403479.1
1553178_a_at	49.4	A	388.5	A	241.8	A	227.2	A	386.4	P	146.2	A	528.3	A	220.7	A	584	P	389.5	A	257.4	A	336.4	A	gb:NM_001051.1 /DB_XREF=gi:4557860 /GEN=SSTR3 /TID=Hs2.225995.1 /CNT=11 /FEA=FLmRNA /TIER=FL /STK=1 /LL=6753 /UG=Hs.225995 /DEF=Homo sapiens somatostatin receptor 3 (SSTR3), mRNA. /PROD=somatostatin receptor 3 /FL=gb:NM_001051.1
1553179_at	5.4	A	4.2	A	7.3	A	9.8	A	124.9	A	5.9	A	20.2	A	7.3	A	17.3	A	4.5	A	4.6	A	5	A	gb:NM_133638.1 /DB_XREF=gi:19525736 /GEN=ADAMTS19 /TID=Hs2.353114.1 /CNT=9 /FEA=FLmRNA /TIER=FL /STK=1 /LL=171019 /UG=Hs.353114 /DEF=Homo sapiens a disintegrin-like and metalloprotease (reprolysin type) with thrombospondin type 1 motif, 19 (ADAMTS19), mRNA. /PROD=a disintegrin-like and metalloprotease(reprolysin type) with thrombospondin type 1 motif, 19preproprotein /FL=gb:NM_133638.1
1553180_at	1.2	A	33.5	A	0.8	A	2	A	48.7	A	21.1	A	61.1	A	4.5	A	9.1	A	6.3	A	30.7	A	9.5	A	gb:NM_133638.1 /DB_XREF=gi:19525736 /GEN=ADAMTS19 /TID=Hs2.353114.1 /CNT=9 /FEA=FLmRNA /TIER=ConsEnd /STK=0 /LL=171019 /UG=Hs.353114 /DEF=Homo sapiens a disintegrin-like and metalloprotease (reprolysin type) with thrombospondin type 1 motif, 19 (ADAMTS19), mRNA. /PROD=a disintegrin-like and metalloprotease(reprolysin type) with thrombospondin type 1 motif, 19preproprotein /FL=gb:NM_133638.1
1553181_at	385.6	P	343.2	P	250	P	168.7	P	252.9	P	231.1	P	252.8	P	195.8	P	284.7	P	225.6	P	288.4	P	288	P	gb:NM_138620.1 /DB_XREF=gi:20336297 /GEN=DDX31 /TID=Hs2.69331.2 /CNT=9 /FEA=FLmRNA /TIER=FL /STK=1 /LL=64794 /UG=Hs.69331 /DEF=Homo sapiens DEADH (Asp-Glu-Ala-AspHis) box polypeptide 31 (DDX31), transcript variant 2, mRNA. /PROD=DEADH (Asp-Glu-Ala-AspHis) box polypeptide 31isoform 2 /FL=gb:NM_138620.1
1553183_at	9.9	A	4.6	A	4.4	A	3	A	2.4	A	36.8	A	8	A	27.9	A	2.4	A	60.5	A	5.1	A	28.2	A	gb:NM_173568.1 /DB_XREF=gi:27734852 /TID=Hs2.242520.1 /CNT=9 /FEA=FLmRNA /TIER=FL /STK=1 /LL=253815 /UG_GENE=FLJ36335 /UG=Hs.242520 /UG_TITLE=hypothetical protein FLJ36335 /DEF=Homo sapiens hypothetical protein FLJ36335 (FLJ36335), mRNA. /FL=gb:NM_173568.1
1553185_at	257.3	P	172.7	P	202	P	323.5	P	545.3	P	236.1	P	493.8	P	100.7	P	296.1	P	314.5	P	112.6	P	173	P	gb:NM_152573.1 /DB_XREF=gi:22749180 /TID=Hs2.351442.1 /CNT=9 /FEA=FLmRNA /TIER=FL /STK=1 /LL=158158 /UG_GENE=FLJ31614 /UG=Hs.351442 /UG_TITLE=hypothetical protein FLJ31614 /DEF=Homo sapiens hypothetical protein FLJ31614 (FLJ31614), mRNA. /FL=gb:NM_152573.1
1553186_x_at	195.3	P	193.4	P	253.6	P	386	P	302.2	P	482.1	P	484.6	P	161.5	P	393.1	P	350.8	P	207.1	P	162.3	P	gb:NM_152573.1 /DB_XREF=gi:22749180 /TID=Hs2.351442.1 /CNT=9 /FEA=FLmRNA /TIER=FL /STK=1 /LL=158158 /UG_GENE=FLJ31614 /UG=Hs.351442 /UG_TITLE=hypothetical protein FLJ31614 /DEF=Homo sapiens hypothetical protein FLJ31614 (FLJ31614), mRNA. /FL=gb:NM_152573.1
1553188_s_at	16.3	A	4.6	A	4.2	A	2.9	A	3.3	A	8.3	A	34.5	A	3	A	8.9	A	4.1	A	7.3	A	9.2	A	gb:AF428251.1 /DB_XREF=gi:16903869 /GEN=PAR3L /TID=Hs2.194058.1 /CNT=19 /FEA=FLmRNA /TIER=FL /STK=1 /LL=117583 /UG=Hs.194058 /DEF=Homo sapiens partitioning-defective 3-like protein splice variant b (PAR3L) mRNA, complete cds; alternatively spliced. /PROD=partitioning-defective 3-like protein splicevariant b /FL=gb:AB092439.1 gb:AF466152.1 gb:AF428251.1 gb:NM_057177.3
1553190_s_at	38.9	A	116	A	24.5	A	23.4	A	230	A	154.1	A	133.7	A	94.8	A	45.1	A	203.9	A	133.7	A	71.1	A	gb:AB092439.1 /DB_XREF=gi:27531718 /TID=Hs2.194058.1 /CNT=19 /FEA=FLmRNA /TIER=FL /STK=1 /LL=117583 /UG_GENE=ALS2CR19 /UG=Hs.194058 /DEF=Homo sapiens mRNA for PAR3 beta alternatively spliced form, complete cds. /PROD=PAR3 beta alternatively spliced form /FL=gb:AB092439.1 gb:AF466152.1 gb:AF428251.1 gb:NM_057177.3
1553191_at	6.2	A	24.7	A	58.8	P	15.9	A	6.8	A	38.9	A	163.7	A	2.9	A	85.1	A	72.3	A	38.8	A	18	A	gb:NM_020388.2 /DB_XREF=gi:20357503 /GEN=BPAG1 /TID=Hs2.198689.2 /CNT=18 /FEA=FLmRNA /TIER=FL /STK=1 /LL=667 /UG=Hs.198689 /DEF=Homo sapiens bullous pemphigoid antigen 1, 230240kDa (BPAG1), transcript variant 1eB, mRNA. /PROD=bullous pemphigoid antigen 1 isoform 1eBprecursor /FL=gb:NM_020388.2
1553192_at	86.4	A	81.8	P	72.1	A	66.3	P	58	A	75.9	P	108	P	62.8	P	17.8	A	52	P	70.9	P	5.7	A	gb:NM_152355.1 /DB_XREF=gi:22748768 /TID=Hs2.333348.1 /CNT=14 /FEA=FLmRNA /TIER=FL /STK=1 /LL=126068 /UG_GENE=FLJ38637 /UG=Hs.333348 /UG_TITLE=hypothetical protein FLJ38637 /DEF=Homo sapiens hypothetical protein FLJ38637 (FLJ38637), mRNA. /FL=gb:NM_152355.1
1553193_at	7	A	77.1	M	100.7	P	82.1	P	8.6	A	116.7	A	123.3	A	45.1	A	7.8	A	14.7	A	101.3	P	16.5	A	gb:NM_152355.1 /DB_XREF=gi:22748768 /TID=Hs2.333348.1 /CNT=14 /FEA=FLmRNA /TIER=ConsEnd /STK=0 /LL=126068 /UG_GENE=FLJ38637 /UG=Hs.333348 /UG_TITLE=hypothetical protein FLJ38637 /DEF=Homo sapiens hypothetical protein FLJ38637 (FLJ38637), mRNA. /FL=gb:NM_152355.1
1553194_at	12.3	A	35.4	A	1.8	A	5.1	A	55.3	A	9.7	A	171.9	A	64.6	A	65.1	A	14.2	A	10.4	A	56.7	A	gb:NM_173808.1 /DB_XREF=gi:27754173 /TID=Hs2.299916.1 /CNT=14 /FEA=FLmRNA /TIER=FL /STK=1 /LL=257194 /UG_GENE=MGC46680 /UG=Hs.299916 /UG_TITLE=hypothetical protein MGC46680 /DEF=Homo sapiens hypothetical protein MGC46680 (MGC46680), mRNA. /FL=gb:NM_173808.1
1553196_a_at	12.5	A	10.3	A	13.5	A	8	A	17.9	A	15.1	A	70.1	A	5.7	A	13.8	A	11.7	A	12.5	A	10.2	A	gb:AY043466.1 /DB_XREF=gi:15528834 /GEN=FCRH3 /TID=Hs2.123296.1 /CNT=13 /FEA=FLmRNA /TIER=FL /STK=1 /LL=115352 /UG=Hs.123296 /DEF=Homo sapiens Fc receptor-like protein 3 (FCRH3) mRNA, complete cds. /PROD=Fc receptor-like protein 3 /FL=gb:AY043466.1 gb:AF459027.1 gb:NM_052939.2
1553197_at	9.6	A	51.6	A	2.8	A	5.4	A	12.6	A	1018.7	P	37.6	A	3.4	A	45.5	A	27.1	A	24.2	A	25.6	A	gb:NM_152418.1 /DB_XREF=gi:22748884 /TID=Hs2.371738.1 /CNT=11 /FEA=FLmRNA /TIER=FL /STK=1 /LL=138009 /UG_GENE=FLJ35775 /UG=Hs.371738 /UG_TITLE=hypothetical protein FLJ35775 /DEF=Homo sapiens hypothetical protein FLJ35775 (FLJ35775), mRNA. /FL=gb:NM_152418.1
1553199_at	6.9	A	28.6	A	29.6	A	5.3	A	3.2	A	496.8	P	92.4	A	5.2	A	4	A	8.7	A	40.2	A	1.3	A	gb:AA583332 /DB_XREF=gi:2367941 /DB_XREF=nn45f01.s1 /CLONE=IMAGE:1086841 /TID=Hs2.371738.1 /CNT=11 /FEA=FLmRNA /TIER=ConsEnd /STK=0 /LL=138009 /UG_GENE=FLJ35775 /UG=Hs.371738 /UG_TITLE=hypothetical protein FLJ35775 /FL=gb:NM_152418.1
1553202_at	46.7	A	11.3	A	36.5	A	13.5	A	11.4	A	18.7	A	21.5	A	40.4	A	35.5	A	11.1	A	12.1	A	10.8	A	gb:NM_152709.1 /DB_XREF=gi:22749410 /TID=Hs2.37636.1 /CNT=11 /FEA=FLmRNA /TIER=FL /STK=1 /LL=219736 /UG_GENE=FLJ25162 /UG=Hs.37636 /UG_TITLE=hypothetical protein FLJ25162 /DEF=Homo sapiens hypothetical protein FLJ25162 (FLJ25162), mRNA. /FL=gb:NM_152709.1
1553204_at	268.3	P	244	A	156	P	69.8	A	170	M	263.2	A	305	A	87.3	A	145.8	M	160.4	A	109.1	A	41.4	A	gb:NM_152757.1 /DB_XREF=gi:22749482 /TID=Hs2.337024.1 /CNT=10 /FEA=FLmRNA /TIER=FL /STK=1 /LL=253868 /UG_GENE=FLJ30313 /UG=Hs.337024 /UG_TITLE=hypothetical protein FLJ30313 /DEF=Homo sapiens hypothetical protein FLJ30313 (FLJ30313), mRNA. /FL=gb:NM_152757.1
1553205_at	371.5	A	431.1	P	297.4	A	232	P	638.7	P	345.5	M	524.9	P	248.9	A	440.3	A	227.9	A	237.5	P	392.6	P	gb:AL832097.1 /DB_XREF=gi:21732639 /TID=Hs2.337024.1 /CNT=10 /FEA=FLmRNA /TIER=ConsEnd /STK=0 /LL=253868 /UG_GENE=FLJ30313 /UG=Hs.337024 /UG_TITLE=hypothetical protein FLJ30313 /DEF=Homo sapiens mRNA; cDNA DKFZp313D1938 (from clone DKFZp313D1938). /FL=gb:NM_152757.1
1553207_at	148.1	A	231.7	P	152.4	M	68.1	A	9.9	A	121.6	A	206.1	A	123.6	A	116.3	A	138.4	P	105.4	A	167.8	P	gb:NM_173664.1 /DB_XREF=gi:27734808 /TID=Hs2.169095.1 /CNT=9 /FEA=FLmRNA /TIER=FL /STK=1 /LL=285598 /UG_GENE=FLJ39249 /UG=Hs.169095 /UG_TITLE=hypothetical protein FLJ39249 /DEF=Homo sapiens hypothetical protein FLJ39249 (FLJ39249), mRNA. /FL=gb:NM_173664.1
1553208_s_at	17.7	A	14.8	A	32.2	A	21.3	A	3.9	A	5.1	A	147.4	A	81.8	A	47.5	A	133.7	A	50.3	A	71.7	A	gb:NM_173664.1 /DB_XREF=gi:27734808 /TID=Hs2.169095.1 /CNT=9 /FEA=FLmRNA /TIER=FL /STK=1 /LL=285598 /UG_GENE=FLJ39249 /UG=Hs.169095 /UG_TITLE=hypothetical protein FLJ39249 /DEF=Homo sapiens hypothetical protein FLJ39249 (FLJ39249), mRNA. /FL=gb:NM_173664.1
1553209_at	142.7	A	109.5	A	64.2	A	129.6	A	139.8	A	75.6	A	255.8	A	79.6	A	109.3	A	115	A	155.1	A	121.5	A	gb:NM_032814.1 /DB_XREF=gi:14249505 /TID=Hs2.347310.1 /CNT=9 /FEA=FLmRNA /TIER=FL /STK=1 /LL=84900 /UG_GENE=FLJ14627 /UG=Hs.347310 /UG_TITLE=hypothetical protein FLJ14627 /DEF=Homo sapiens hypothetical protein FLJ14627 (FLJ14627), mRNA. /FL=gb:NM_032814.1
1553211_at	13.8	A	78.8	A	15.4	A	13.8	A	48.6	A	8.2	A	579.6	P	56	A	26.3	A	10.4	A	8.1	A	139.2	A	gb:NM_153228.1 /DB_XREF=gi:23397495 /TID=Hs2.376226.1 /CNT=8 /FEA=FLmRNA /TIER=FL /STK=1 /LL=162282 /UG_GENE=FLJ38335 /UG=Hs.376226 /UG_TITLE=hypothetical protein FLJ38335 /DEF=Homo sapiens hypothetical protein FLJ38335 (FLJ38335), mRNA. /FL=gb:NM_153228.1
1553212_at	162.9	A	279.9	P	93.5	A	94.7	A	69.6	A	69.1	A	83.3	A	61.4	A	162.3	A	186.1	A	99.3	A	120.5	A	gb:NM_173352.1 /DB_XREF=gi:27597103 /GEN=K5B /TID=Hs2.121824.1 /CNT=8 /FEA=FLmRNA /TIER=FL /STK=1 /LL=196374 /UG=Hs.121824 /DEF=Homo sapiens keratin 5b (K5B), mRNA. /PROD=keratin 5b /FL=gb:NM_173352.1
1553213_a_at	36.9	A	108.2	A	20	A	26.8	A	8.5	A	18.5	A	47.4	A	3.3	A	5.4	A	12.6	A	10.2	A	15.7	A	gb:NM_173352.1 /DB_XREF=gi:27597103 /GEN=K5B /TID=Hs2.121824.1 /CNT=8 /FEA=FLmRNA /TIER=FL /STK=1 /LL=196374 /UG=Hs.121824 /DEF=Homo sapiens keratin 5b (K5B), mRNA. /PROD=keratin 5b /FL=gb:NM_173352.1
1553214_a_at	11.7	A	28.5	A	9.1	A	8.3	A	1.6	A	36.9	A	7	A	0.6	A	0.6	A	3.2	A	2.5	A	3.9	A	gb:NM_145023.1 /DB_XREF=gi:21450754 /TID=Hs2.350690.1 /CNT=8 /FEA=FLmRNA /TIER=FL /STK=1 /LL=221016 /UG_GENE=FLJ32762 /UG=Hs.350690 /UG_TITLE=hypothetical protein FLJ32762 /DEF=Homo sapiens hypothetical protein FLJ32762 (FLJ32762), mRNA. /FL=gb:NM_145023.1
1553215_s_at	17.1	A	33.4	A	76.9	A	11.4	A	22.5	A	78.5	A	46.3	A	12.9	A	26.6	A	16.2	A	44.3	A	104.1	A	gb:NM_145023.1 /DB_XREF=gi:21450754 /TID=Hs2.350690.1 /CNT=8 /FEA=FLmRNA /TIER=FL /STK=1 /LL=221016 /UG_GENE=FLJ32762 /UG=Hs.350690 /UG_TITLE=hypothetical protein FLJ32762 /DEF=Homo sapiens hypothetical protein FLJ32762 (FLJ32762), mRNA. /FL=gb:NM_145023.1
1553216_at	130.4	P	198.6	P	79.9	P	100.8	P	219.3	P	124.5	P	22.5	A	66.3	P	180	P	60.4	A	131.3	P	85.6	A	gb:NM_007130.1 /DB_XREF=gi:23510456 /GEN=ZNF41 /TID=Hs2.143700.2 /CNT=7 /FEA=FLmRNA /TIER=FL /STK=1 /LL=7592 /UG=Hs.143700 /DEF=Homo sapiens zinc finger protein 41 (ZNF41), transcript variant 1, mRNA. /PROD=zinc finger protein 41 /FL=gb:NM_007130.1
1553217_s_at	183.4	A	87.3	P	23.4	A	91.8	P	127.9	P	103.3	P	183.7	A	93.6	P	182.7	P	97.3	P	96.6	P	117	P	gb:NM_007130.1 /DB_XREF=gi:23510456 /GEN=ZNF41 /TID=Hs2.143700.2 /CNT=7 /FEA=FLmRNA /TIER=FL /STK=1 /LL=7592 /UG=Hs.143700 /DEF=Homo sapiens zinc finger protein 41 (ZNF41), transcript variant 1, mRNA. /PROD=zinc finger protein 41 /FL=gb:NM_007130.1
1553218_a_at	1128.5	P	1084.2	P	1924.6	P	1597.8	P	695.9	P	998.8	P	1489.2	P	912.5	P	571.8	P	1815.5	P	1032.6	P	1405.2	P	gb:NM_032434.1 /DB_XREF=gi:24308327 /GEN=KIAA1805 /TID=Hs2.294122.1 /CNT=7 /FEA=FLmRNA /TIER=FL /STK=1 /LL=84450 /UG=Hs.294122 /DEF=Homo sapiens KIAA1805 protein (KIAA1805), mRNA. /PROD=KIAA1805 protein /FL=gb:NM_032434.1
1553219_a_at	366.4	A	407.2	A	243.2	A	421.2	P	362.5	P	692.6	P	787.8	P	90.1	A	693.8	M	438.5	A	340.6	A	269.8	A	gb:NM_015365.1 /DB_XREF=gi:7669553 /GEN=AMMECR1 /TID=Hs2.326142.1 /CNT=7 /FEA=FLmRNA /TIER=FL /STK=1 /LL=9949 /UG=Hs.326142 /DEF=Homo sapiens Alport syndrome, mental retardation, midface hypoplasia and elliptocytosis chromosomal region, gene 1 (AMMECR1), mRNA. /PROD=AMMECR1 protein /FL=gb:NM_015365.1
1553220_at	198.6	P	198	P	202.8	P	102.3	P	174.5	P	288.5	P	147.9	A	141.7	P	106.8	A	125.5	P	273.3	P	233.1	A	gb:NM_173511.1 /DB_XREF=gi:27735130 /TID=Hs2.232257.1 /CNT=14 /FEA=FLmRNA /TIER=FL /STK=1 /LL=150864 /UG_GENE=FLJ38771 /UG=Hs.232257 /UG_TITLE=hypothetical protein FLJ38771 /DEF=Homo sapiens hypothetical protein FLJ38771 (FLJ38771), mRNA. /FL=gb:NM_173511.1
1553221_at	187.5	A	137	P	42.7	A	214.3	P	239.4	P	202.3	P	252.4	A	92.2	A	126.8	P	88.7	M	118.7	A	169	P	gb:NM_152478.1 /DB_XREF=gi:22749006 /TID=Hs2.146854.1 /CNT=10 /FEA=FLmRNA /TIER=FL /STK=1 /LL=147949 /UG_GENE=FLJ31030 /UG=Hs.146854 /UG_TITLE=hypothetical protein FLJ31030 /DEF=Homo sapiens hypothetical protein FLJ31030 (FLJ31030), mRNA. /FL=gb:NM_152478.1
1553222_at	394.2	A	596.3	A	699.7	P	479.8	A	616.7	A	586.9	A	781.1	A	529.7	A	740.6	A	347.5	A	534.9	A	530.4	A	gb:AB083055.2 /DB_XREF=gi:22775411 /GEN=tg1019 /TID=Hs2.168439.1 /CNT=10 /FEA=FLmRNA /TIER=FL /STK=1 /LL=165140 /UG=Hs.168439 /DEF=Homo sapiens tg1019 mRNA for G-protein coupled receptor, complete cds. /PROD=G-protein coupled receptor /FL=gb:NM_148962.1 gb:AB083055.2
1553224_at	8.2	A	19.5	A	9.4	A	46	A	39.9	A	66.7	A	24.9	A	7.3	A	29.6	A	92.3	A	50.6	A	66.1	A	gb:NM_033631.1 /DB_XREF=gi:19924142 /GEN=LUZP1 /TID=Hs2.396497.1 /CNT=9 /FEA=FLmRNA /TIER=FL /STK=1 /LL=7798 /UG=Hs.396497 /DEF=Homo sapiens leucine zipper protein 1 (LUZP1), mRNA. /PROD=leucine zipper protein 1 /FL=gb:NM_033631.1
1553225_s_at	121.7	P	177.3	A	85.9	A	13.6	A	136.2	P	74.8	A	114.8	A	50.6	A	73	P	70.3	A	10	A	53	A	gb:NM_007131.1 /DB_XREF=gi:19882196 /GEN=ZNF75 /TID=Hs2.355015.1 /CNT=9 /FEA=FLmRNA /TIER=FL /STK=1 /LL=7626 /UG=Hs.355015 /DEF=Homo sapiens zinc finger protein 75 (D8C6) (ZNF75), mRNA. /PROD=zinc finger protein 75 /FL=gb:NM_007131.1
1553226_at	83.1	A	14.8	A	308.2	P	68.8	A	88.8	A	81.4	A	57.2	A	477.5	P	119.7	A	49.8	A	60.4	A	24.7	A	gb:NM_152454.1 /DB_XREF=gi:22748952 /TID=Hs2.350808.1 /CNT=9 /FEA=FLmRNA /TIER=FL /STK=1 /LL=145978 /UG_GENE=FLJ31461 /UG=Hs.350808 /UG_TITLE=hypothetical protein FLJ31461 /DEF=Homo sapiens hypothetical protein FLJ31461 (FLJ31461), mRNA. /FL=gb:NM_152454.1
1553227_s_at	366.9	P	261.7	P	173.6	P	80.5	P	140.5	P	176.5	P	235.8	P	125.5	P	230.9	P	123.8	M	191.5	P	142.5	M	gb:NM_018963.2 /DB_XREF=gi:16445435 /GEN=WDR9 /TID=Hs2.225674.2 /CNT=8 /FEA=FLmRNA /TIER=FL /STK=1 /LL=54014 /UG=Hs.225674 /DEF=Homo sapiens WD repeat domain 9 (WDR9), transcript variant 1, mRNA. /PROD=WD repeat domain 9 isoform A /FL=gb:NM_018963.2
1553228_at	110.7	P	61.1	P	24.6	A	12.6	A	28.6	A	67	A	61	A	7.6	A	22.3	A	48.8	A	6.4	A	7.8	A	gb:NM_152723.1 /DB_XREF=gi:22749428 /TID=Hs2.376241.1 /CNT=8 /FEA=FLmRNA /TIER=FL /STK=1 /LL=220388 /UG_GENE=FLJ38159 /UG=Hs.376241 /UG_TITLE=hypothetical protein FLJ38159 /DEF=Homo sapiens hypothetical protein FLJ38159 (FLJ38159), mRNA. /FL=gb:NM_152723.1
1553229_at	86.8	A	9.5	A	250.5	A	246.8	A	20.6	A	130.5	A	271.6	A	138.9	A	28.5	A	165.1	A	58.5	A	29.9	A	gb:NM_152412.1 /DB_XREF=gi:22748872 /TID=Hs2.175350.1 /CNT=7 /FEA=FLmRNA /TIER=FL /STK=1 /LL=137209 /UG_GENE=FLJ38002 /UG=Hs.175350 /UG_TITLE=hypothetical protein FLJ38002 /DEF=Homo sapiens hypothetical protein FLJ38002 (FLJ38002), mRNA. /FL=gb:NM_152412.1
1553232_at	113.8	A	50.9	A	17.1	A	44.3	A	12.5	A	85.9	A	62.4	A	12.8	A	158.4	A	146	A	94.2	A	97.6	A	gb:NM_144713.1 /DB_XREF=gi:21389490 /TID=Hs2.9905.1 /CNT=7 /FEA=FLmRNA /TIER=FL /STK=1 /LL=151393 /UG_GENE=FLJ32954 /UG=Hs.9905 /UG_TITLE=hypothetical protein FLJ32954 /DEF=Homo sapiens hypothetical protein FLJ32954 (FLJ32954), mRNA. /FL=gb:NM_144713.1
1553234_at	75.7	A	120.1	A	127.2	A	150.5	A	199.6	A	129.1	A	470.9	A	143.3	A	130.4	A	136.2	A	179.3	A	151.1	A	gb:NM_139054.1 /DB_XREF=gi:21265066 /GEN=ADAMTS18 /TID=Hs2.283570.1 /CNT=6 /FEA=FLmRNA /TIER=FL /STK=1 /LL=170692 /UG=Hs.283570 /DEF=Homo sapiens a disintegrin-like and metalloprotease (reprolysin type) with thrombospondin type 1 motif, 18 (ADAMTS18), mRNA. /PROD=a disintegrin-like and metalloprotease(reprolysin type) with thrombospondin type 1 motif, 18preproprotein /FL=gb:NM_139054.1
1553235_at	23.1	A	18.4	A	12.4	A	12.6	A	16.4	A	13.6	A	34.4	A	5.9	A	26	A	15.4	A	32.1	A	10.1	A	gb:NM_031882.2 /DB_XREF=gi:14717402 /GEN=PCDHAC1 /TID=Hs2.269467.2 /CNT=6 /FEA=FLmRNA /TIER=FL /STK=1 /LL=56135 /UG=Hs.269467 /DEF=Homo sapiens protocadherin alpha subfamily C, 1 (PCDHAC1), transcript variant 2, mRNA. /PROD=protocadherin alpha subfamily C, 1, isoform 2precursor /FL=gb:NM_031882.2 gb:AF152473.1
1553237_x_at	147	A	84.6	A	17.8	A	107.2	A	203.5	A	109.2	A	213.5	A	5.3	A	129.8	A	119.7	A	109.6	A	56.7	A	gb:NM_031882.2 /DB_XREF=gi:14717402 /GEN=PCDHAC1 /TID=Hs2.269467.2 /CNT=6 /FEA=FLmRNA /TIER=FL /STK=1 /LL=56135 /UG=Hs.269467 /DEF=Homo sapiens protocadherin alpha subfamily C, 1 (PCDHAC1), transcript variant 2, mRNA. /PROD=protocadherin alpha subfamily C, 1, isoform 2precursor /FL=gb:NM_031882.2 gb:AF152473.1
1553238_a_at	369.7	A	77.6	A	188.2	A	219.6	A	123.3	A	94.3	A	323.8	A	177.6	A	350.2	A	240.6	A	216.5	A	195.6	A	gb:NM_144685.1 /DB_XREF=gi:21389586 /TID=Hs2.210697.1 /CNT=6 /FEA=FLmRNA /TIER=FL /STK=1 /LL=147746 /UG_GENE=FLJ32818 /UG=Hs.210697 /UG_TITLE=hypothetical protein FLJ32818 /DEF=Homo sapiens hypothetical protein FLJ32818 (FLJ32818), mRNA. /FL=gb:NM_144685.1
1553239_at	294.5	P	183.5	A	238.1	P	118.6	A	131.1	A	106.2	A	86.1	A	82.4	A	281	A	51.4	A	154.8	M	145.7	A	gb:NM_145019.1 /DB_XREF=gi:21450746 /TID=Hs2.292590.1 /CNT=6 /FEA=FLmRNA /TIER=FL /STK=1 /LL=220108 /UG_GENE=FLJ30707 /UG=Hs.292590 /UG_TITLE=hypothetical protein FLJ30707 /DEF=Homo sapiens hypothetical protein FLJ30707 (FLJ30707), mRNA. /FL=gb:NM_145019.1
1553241_at	127.3	A	170.5	M	42.7	A	36.4	A	9.7	A	91.6	A	88.7	A	86.6	A	43	A	89	A	77.2	A	152.4	A	gb:NM_173688.1 /DB_XREF=gi:27734999 /TID=Hs2.244376.1 /CNT=6 /FEA=FLmRNA /TIER=FL /STK=1 /LL=286183 /UG_GENE=FLJ39630 /UG=Hs.244376 /UG_TITLE=hypothetical protein FLJ39630 /DEF=Homo sapiens hypothetical protein FLJ39630 (FLJ39630), mRNA. /FL=gb:NM_173688.1
1553243_at	15.7	A	58.8	A	1397	P	32.9	A	33.1	A	271.3	P	253.2	A	4.2	A	2438	P	60.8	A	14.1	A	1202.4	P	gb:NM_032817.1 /DB_XREF=gi:14249511 /TID=Hs2.245326.1 /CNT=11 /FEA=FLmRNA /TIER=FL /STK=1 /LL=84903 /UG_GENE=FLJ14641 /UG=Hs.245326 /UG_TITLE=hypothetical protein FLJ14641 /DEF=Homo sapiens hypothetical protein FLJ14641 (FLJ14641), mRNA. /FL=gb:NM_032817.1
1553244_at	67.1	A	64.8	A	26.4	A	46.3	A	58.3	A	47.2	A	19.7	A	98.9	A	100.7	A	140	A	71	A	127.3	A	gb:NM_152633.1 /DB_XREF=gi:22749292 /TID=Hs2.277254.1 /CNT=9 /FEA=FLmRNA /TIER=FL /STK=1 /LL=170079 /UG_GENE=FLJ34064 /UG=Hs.277254 /UG_TITLE=hypothetical protein FLJ34064 /DEF=Homo sapiens hypothetical protein FLJ34064 (FLJ34064), mRNA. /FL=gb:NM_152633.1
1553246_a_at	338.9	A	301.2	A	173.2	A	225.2	A	254.5	A	152.4	A	359.5	A	157.1	A	325.6	A	347.2	A	249	A	242.6	A	gb:NM_032237.2 /DB_XREF=gi:26024341 /TID=Hs2.277431.1 /CNT=9 /FEA=FLmRNA /TIER=FL /STK=1 /LL=84197 /UG_GENE=FLJ23356 /UG=Hs.277431 /UG_TITLE=hypothetical protein FLJ23356 /DEF=Homo sapiens hypothetical protein FLJ23356 (FLJ23356), mRNA. /FL=gb:NM_032237.2
1553247_a_at	46.6	A	20.6	A	14.7	A	14.7	A	26.5	A	19.1	A	13.6	A	5.3	A	0.9	A	39.1	A	34.6	A	24.3	A	gb:NM_152601.1 /DB_XREF=gi:22749234 /TID=Hs2.293223.1 /CNT=8 /FEA=FLmRNA /TIER=FL /STK=1 /LL=163051 /UG_GENE=FLJ38281 /UG=Hs.293223 /UG_TITLE=hypothetical protein FLJ38281 /DEF=Homo sapiens hypothetical protein FLJ38281 (FLJ38281), mRNA. /FL=gb:NM_152601.1
1553248_at	103.7	A	129.4	A	64.5	A	53.7	A	10	A	88.1	A	47	A	51.1	A	97.8	P	48.3	M	83.5	M	113.1	P	gb:NM_152675.1 /DB_XREF=gi:23097324 /TID=Hs2.398067.1 /CNT=8 /FEA=FLmRNA /TIER=FL /STK=1 /LL=201252 /UG_GENE=FLJ23754 /UG=Hs.398067 /UG_TITLE=hypothetical protein FLJ23754 /DEF=Homo sapiens hypothetical protein FLJ23754 (FLJ23754), mRNA. /FL=gb:NM_152675.1
1553249_at	31.5	A	28.9	A	46	A	7.5	A	56.6	A	47.9	A	56	A	51.5	A	52.2	A	4.8	A	69.8	A	40.9	A	gb:NM_148674.1 /DB_XREF=gi:22535295 /GEN=SMC1L2 /TID=Hs2.182437.1 /CNT=7 /FEA=FLmRNA /TIER=FL /STK=1 /LL=27127 /UG=Hs.182437 /DEF=Homo sapiens SMC1 structural maintenance of chromosomes 1-like 2 (yeast) (SMC1L2), mRNA. /PROD=SMC1 structural maintenance of chromosomes1-like 2 /FL=gb:NM_148674.1
1553252_a_at	116.8	A	109.1	A	113.8	A	132.7	A	229.7	P	122.7	A	199.3	A	126.9	A	131.1	A	110.2	A	190.4	P	96.7	A	gb:NM_153252.1 /DB_XREF=gi:23397541 /TID=Hs2.134880.1 /CNT=7 /FEA=FLmRNA /TIER=FL /STK=1 /LL=254065 /UG_GENE=FLJ38568 /UG=Hs.134880 /UG_TITLE=hypothetical protein FLJ38568 /DEF=Homo sapiens hypothetical protein FLJ38568 (FLJ38568), mRNA. /FL=gb:NM_153252.1
1553253_at	197.8	A	203.7	A	411	A	150.6	A	236.5	A	502	A	526.4	A	66.3	A	515.7	A	605.5	A	187.8	A	416.5	A	gb:NM_080863.4 /DB_XREF=gi:24586687 /GEN=ASB16 /TID=Hs2.336948.1 /CNT=7 /FEA=FLmRNA /TIER=FL /STK=1 /LL=92591 /UG=Hs.336948 /DEF=Homo sapiens ankyrin repeat and SOCS box-containing 16 (ASB16), mRNA. /PROD=ankyrin repeat and SOCS box-containing protein16 /FL=gb:NM_080863.4
1553254_at	86.9	A	59.3	A	23	A	6.6	A	36.9	A	76.6	A	125.9	A	1.4	A	49.7	A	18.2	A	54.2	M	25	A	gb:NM_138703.2 /DB_XREF=gi:24432048 /TID=Hs2.356869.1 /CNT=7 /FEA=FLmRNA /TIER=FL /STK=1 /LL=139599 /UG_GENE=HCA3 /UG=Hs.356869 /UG_TITLE=hepatocellular carcinoma-associated protein HCA3 /DEF=Homo sapiens hepatocellular carcinoma-associated protein HCA3 (HCA3), mRNA. /FL=gb:NM_138703.2 gb:AF490509.1
1553255_at	49.4	A	22.2	A	95	A	10.2	A	95.5	A	18.8	A	231.3	A	76.8	A	85	A	166.1	A	68.8	A	10.8	A	gb:NM_152473.1 /DB_XREF=gi:22748988 /TID=Hs2.44329.1 /CNT=7 /FEA=FLmRNA /TIER=FL /STK=1 /LL=147664 /UG_GENE=FLJ32214 /UG=Hs.44329 /UG_TITLE=hypothetical protein FLJ32214 /DEF=Homo sapiens hypothetical protein FLJ32214 (FLJ32214), mRNA. /FL=gb:NM_152473.1
1553257_at	35.7	A	22.6	A	36.8	A	21.5	A	20.1	A	27.9	A	95.1	A	18.4	A	35.3	A	112.3	A	41.1	A	37.4	A	gb:AY026481.1 /DB_XREF=gi:14571497 /TID=Hs2.208343.1 /CNT=7 /FEA=FLmRNA /TIER=FL /STK=1 /LL=89792 /UG_GENE=GAL3ST2 /UG=Hs.208343 /DEF=Homo sapiens beta-galactose-3-O-sulfotransferase 3 mRNA, complete cds. /PROD=beta-galactose-3-O-sulfotransferase 3 /FL=gb:AY026481.1 gb:NM_033036.1 gb:AB053232.1
1553258_at	7.5	A	21.8	A	8.8	A	61.7	A	14	A	74.4	A	26.1	A	15.9	A	29.2	A	9.9	A	26	A	23.7	A	gb:NM_153017.1 /DB_XREF=gi:23308526 /TID=Hs2.97422.1 /CNT=6 /FEA=FLmRNA /TIER=FL /STK=1 /LL=146512 /UG_GENE=FLJ30679 /UG=Hs.97422 /UG_TITLE=hypothetical protein FLJ30679 /DEF=Homo sapiens hypothetical protein FLJ30679 (FLJ30679), mRNA. /FL=gb:NM_153017.1
1553260_s_at	14.5	A	58.5	A	64.6	A	18	A	4.4	A	45.1	A	35	A	63.8	A	53.4	A	34.4	A	60.8	A	85.7	A	gb:NM_152525.1 /DB_XREF=gi:22749088 /TID=Hs2.335788.1 /CNT=6 /FEA=FLmRNA /TIER=FL /STK=1 /LL=151254 /UG_GENE=FLJ25351 /UG=Hs.335788 /UG_TITLE=hypothetical protein FLJ25351 /DEF=Homo sapiens hypothetical protein FLJ25351 (FLJ25351), mRNA. /FL=gb:NM_152525.1
1553261_x_at	65.5	A	74.4	A	2.8	A	45.5	A	55.9	A	71	P	21.6	A	43.9	A	43.4	A	22.7	A	26.6	A	20.3	A	gb:NM_152525.1 /DB_XREF=gi:22749088 /TID=Hs2.335788.1 /CNT=6 /FEA=FLmRNA /TIER=FL /STK=1 /LL=151254 /UG_GENE=FLJ25351 /UG=Hs.335788 /UG_TITLE=hypothetical protein FLJ25351 /DEF=Homo sapiens hypothetical protein FLJ25351 (FLJ25351), mRNA. /FL=gb:NM_152525.1
1553262_a_at	844.6	A	594.3	A	644.1	A	458.9	A	277.5	A	891.1	A	487.4	A	420.7	A	653.3	A	1007.4	A	650.7	A	734.7	A	gb:NM_018949.1 /DB_XREF=gi:9506744 /GEN=GPR14 /TID=Hs2.192720.1 /CNT=6 /FEA=FLmRNA /TIER=FL /STK=1 /LL=2837 /UG=Hs.192720 /DEF=Homo sapiens G protein-coupled receptor 14 (GPR14), mRNA. /PROD=G protein-coupled receptor 14 /FL=gb:NM_018949.1
1553263_at	363.7	A	350.5	A	191.9	A	311.3	P	205.7	A	207.2	A	448.7	A	302.9	P	341.8	P	241.2	A	358.8	A	243.8	A	gb:NM_173477.1 /DB_XREF=gi:27735050 /TID=Hs2.376688.1 /CNT=5 /FEA=FLmRNA /TIER=FL /STK=1 /LL=124590 /UG_GENE=FLJ33924 /UG=Hs.376688 /UG_TITLE=hypothetical protein FLJ33924 /DEF=Homo sapiens hypothetical protein FLJ33924 (FLJ33924), mRNA. /FL=gb:NM_173477.1
1553264_a_at	427	A	109.9	A	81.4	A	107.1	A	54.3	A	66	A	194.1	A	41.8	A	77.1	A	190.7	A	39.4	A	86.4	A	gb:NM_006950.2 /DB_XREF=gi:19924098 /GEN=SYN1 /TID=Hs2.225936.1 /CNT=5 /FEA=FLmRNA /TIER=FL /STK=1 /LL=6853 /UG=Hs.225936 /DEF=Homo sapiens synapsin I (SYN1), transcript variant Ia, mRNA. /PROD=synapsin I isoform Ia /FL=gb:NM_006950.2
1553265_at	13.3	A	8.9	A	4.1	A	49.7	A	4.2	A	78.4	A	19.1	A	7.2	A	26.3	A	14.1	A	34.9	A	13.4	A	gb:NM_144712.1 /DB_XREF=gi:21389488 /TID=Hs2.124565.1 /CNT=5 /FEA=FLmRNA /TIER=FL /STK=1 /LL=151295 /UG_GENE=FLJ31168 /UG=Hs.124565 /UG_TITLE=hypothetical protein FLJ31168 /DEF=Homo sapiens hypothetical protein FLJ31168 (FLJ31168), mRNA. /FL=gb:NM_144712.1
1553266_at	27.4	A	1.3	A	1.7	A	3.8	A	1	A	1.4	A	9.8	A	20.4	A	7.5	A	4.5	A	30.1	A	0.6	A	gb:NM_144571.1 /DB_XREF=gi:21687267 /TID=Hs2.183085.1 /CNT=5 /FEA=FLmRNA /TIER=FL /STK=1 /LL=246175 /UG_GENE=CNOT6L /UG=Hs.183085 /UG_TITLE=CCR4-NOT transcription complex, subunit 6-like /DEF=Homo sapiens CCR4-NOT transcription complex, subunit 6-like (CNOT6L), mRNA. /FL=gb:NM_144571.1
1553267_a_at	50.5	A	15.3	A	3.9	A	60.5	A	80	A	5.7	A	32.6	A	3.7	A	11.3	A	18.1	A	7.3	A	3.8	A	gb:NM_144571.1 /DB_XREF=gi:21687267 /TID=Hs2.183085.1 /CNT=5 /FEA=FLmRNA /TIER=FL /STK=1 /LL=246175 /UG_GENE=CNOT6L /UG=Hs.183085 /UG_TITLE=CCR4-NOT transcription complex, subunit 6-like /DEF=Homo sapiens CCR4-NOT transcription complex, subunit 6-like (CNOT6L), mRNA. /FL=gb:NM_144571.1
1553268_at	163.8	A	195.1	A	76.8	A	74.8	A	128.1	A	41	A	127.3	A	6	A	181	A	32.9	A	89.2	A	128.4	P	gb:NM_138328.1 /DB_XREF=gi:21264325 /GEN=RHBDL4 /TID=Hs2.353064.1 /CNT=5 /FEA=FLmRNA /TIER=FL /STK=1 /LL=162494 /UG=Hs.353064 /DEF=Homo sapiens rhomboid, veinlet-like 4 (Drosophila) (RHBDL4), mRNA. /PROD=rhomboid, veinlet-like 4 /FL=gb:NM_138328.1
1553269_at	154.2	P	91.1	P	23.9	A	134.9	P	138.8	P	42.6	A	11.2	A	109.6	P	88.2	P	73.2	P	2.3	A	1.8	A	gb:CA411757 /DB_XREF=gi:24774408 /DB_XREF=UI-H-EZ0-bal-n-06-0-UI.s1 /CLONE=UI-H-EZ0-bal-n-06-0-UI /TID=Hs2.333344.1 /CNT=9 /FEA=FLmRNA /TIER=ConsEnd /STK=1 /LL=255403 /UG_GENE=FLJ90036 /UG=Hs.333344 /UG_TITLE=hypothetical protein FLJ90036 /FL=gb:NM_153691.1
1553271_at	1.8	A	11.9	A	112	A	3.8	A	7.9	A	55.9	A	29.7	A	29.2	A	27.8	A	53	A	52.4	A	19.7	A	gb:NM_173602.1 /DB_XREF=gi:27734700 /TID=Hs2.376658.1 /CNT=7 /FEA=FLmRNA /TIER=FL /STK=1 /LL=283470 /UG_GENE=FLJ34278 /UG=Hs.376658 /UG_TITLE=hypothetical protein FLJ34278 /DEF=Homo sapiens hypothetical protein FLJ34278 (FLJ34278), mRNA. /FL=gb:NM_173602.1
1553272_at	501.8	A	318.2	A	33.6	A	41.6	A	316.6	A	289.4	A	351.1	A	49.6	A	46.1	A	67.9	A	92.7	A	39.3	A	gb:NM_078483.1 /DB_XREF=gi:17505222 /GEN=SLC36A1 /TID=Hs2.146612.1 /CNT=7 /FEA=FLmRNA /TIER=FL /STK=1 /LL=206358 /UG=Hs.146612 /DEF=Homo sapiens solute carrier family 36 (protonamino acid symporter), member 1 (SLC36A1), mRNA. /PROD=lysosomal amino acid transporter 1 /FL=gb:NM_078483.1
1553274_a_at	195.7	P	303.6	P	341.5	P	317	P	726.1	P	132.5	P	508.8	P	279.4	P	308.2	P	284.3	P	165.4	P	112.5	P	gb:NM_152551.1 /DB_XREF=gi:22749140 /TID=Hs2.13366.1 /CNT=6 /FEA=FLmRNA /TIER=FL /STK=1 /LL=154007 /UG_GENE=FLJ32234 /UG=Hs.13366 /UG_TITLE=hypothetical protein FLJ32234 /DEF=Homo sapiens hypothetical protein FLJ32234 (FLJ32234), mRNA. /FL=gb:NM_152551.1
1553275_s_at	92.8	P	96.1	P	38.6	P	70.4	P	50.6	A	28.6	A	6.4	A	47.7	P	81.5	A	14.9	A	60.2	A	61.5	A	gb:NM_173594.1 /DB_XREF=gi:27734784 /TID=Hs2.270868.1 /CNT=6 /FEA=FLmRNA /TIER=FL /STK=1 /LL=283372 /UG_GENE=FLJ25613 /UG=Hs.270868 /UG_TITLE=hypothetical protein FLJ25613 /DEF=Homo sapiens hypothetical protein FLJ25613 (FLJ25613), mRNA. /FL=gb:NM_173594.1
1553276_at	9.1	A	11.1	A	2.8	A	1.3	A	3.6	A	4.3	A	33.9	A	52	A	2.3	A	25.2	A	9.6	A	10.2	A	gb:NM_152476.1 /DB_XREF=gi:22749002 /TID=Hs2.232614.1 /CNT=6 /FEA=FLmRNA /TIER=FL /STK=1 /LL=147741 /UG_GENE=FLJ31986 /UG=Hs.232614 /UG_TITLE=hypothetical protein FLJ31986 /DEF=Homo sapiens hypothetical protein FLJ31986 (FLJ31986), mRNA. /FL=gb:NM_152476.1
1553277_at	28.4	A	47.4	A	12.6	A	41.6	A	30.1	A	1	A	162.3	A	20.3	A	41.5	A	29.5	A	3.1	A	47.5	A	gb:NM_173630.1 /DB_XREF=gi:27734976 /TID=Hs2.323796.1 /CNT=6 /FEA=FLmRNA /TIER=FL /STK=1 /LL=284278 /UG_GENE=FLJ39085 /UG=Hs.323796 /UG_TITLE=hypothetical protein FLJ39085 /DEF=Homo sapiens hypothetical protein FLJ39085 (FLJ39085), mRNA. /FL=gb:NM_173630.1
1553279_at	132	A	36.8	A	216.1	A	59.7	A	34.6	A	175.9	A	90	A	83.3	A	36.2	A	152.2	A	163.2	A	45.5	A	gb:NM_152547.1 /DB_XREF=gi:22749132 /TID=Hs2.326451.1 /CNT=6 /FEA=FLmRNA /TIER=FL /STK=1 /LL=153579 /UG_GENE=FLJ32535 /UG=Hs.326451 /UG_TITLE=hypothetical protein FLJ32535 /DEF=Homo sapiens hypothetical protein FLJ32535 (FLJ32535), mRNA. /FL=gb:NM_152547.1
1553280_at	276.9	P	145.7	P	198.5	P	176.5	P	222.8	P	114.1	A	272.4	A	148.9	P	192.6	P	126.2	A	227.9	P	127.7	P	gb:NM_144709.1 /DB_XREF=gi:21389306 /TID=Hs2.112830.1 /CNT=6 /FEA=FLmRNA /TIER=FL /STK=1 /LL=150962 /UG_GENE=FLJ32312 /UG=Hs.112830 /UG_TITLE=hypothetical protein FLJ32312 /DEF=Homo sapiens hypothetical protein FLJ32312 (FLJ32312), mRNA. /FL=gb:NM_144709.1
1553281_at	60.9	A	100.5	A	33.8	A	52	A	47	A	9.6	A	24.6	A	17.1	A	33.1	A	80.2	A	35.2	A	22.4	A	gb:NM_153268.1 /DB_XREF=gi:23397569 /TID=Hs2.350798.1 /CNT=6 /FEA=FLmRNA /TIER=FL /STK=1 /LL=257068 /UG_GENE=FLJ31579 /UG=Hs.350798 /UG_TITLE=hypothetical protein FLJ31579 /DEF=Homo sapiens hypothetical protein FLJ31579 (FLJ31579), mRNA. /FL=gb:NM_153268.1
1553282_at	92.9	A	177.4	A	7.6	A	21.4	A	53.4	A	20.1	A	40.1	A	54	A	8.5	A	43.2	A	52.1	A	99.2	A	gb:NM_152507.1 /DB_XREF=gi:22749052 /TID=Hs2.45220.1 /CNT=5 /FEA=FLmRNA /TIER=FL /STK=1 /LL=150147 /UG_GENE=FLJ33471 /UG=Hs.45220 /UG_TITLE=hypothetical protein FLJ33471 /DEF=Homo sapiens hypothetical protein FLJ33471 (FLJ33471), mRNA. /FL=gb:NM_152507.1
1553284_s_at	136.4	A	237.4	A	54.8	A	206.4	P	147.5	P	175.8	P	134.2	A	82.9	P	406.2	P	139.5	P	237.9	P	163.8	P	gb:NM_033029.1 /DB_XREF=gi:14719421 /GEN=LMLN /TID=Hs2.432613.1 /CNT=5 /FEA=FLmRNA /TIER=FL /STK=1 /LL=89782 /UG=Hs.432613 /DEF=Homo sapiens leishmanolysin-like (metallopeptidase M8 family) (LMLN), mRNA. /PROD=leishmanolysin-like (metallopeptidase M8family) /FL=gb:NM_033029.1
1553285_s_at	31.5	A	50.8	M	42.5	P	27.5	A	73.5	A	49.5	A	38.4	A	46.1	A	17.6	A	29.4	A	97.2	A	40.2	A	gb:NM_152442.1 /DB_XREF=gi:22748924 /TID=Hs2.97794.1 /CNT=5 /FEA=FLmRNA /TIER=FL /STK=1 /LL=144715 /UG_GENE=FLJ40346 /UG=Hs.97794 /UG_TITLE=hypothetical protein FLJ40346 /DEF=Homo sapiens hypothetical protein FLJ40346 (FLJ40346), mRNA. /FL=gb:NM_152442.1
1553286_at	293.9	A	153.7	A	171.4	P	255.2	P	114.1	P	124.2	P	374.5	P	139.3	A	180.3	A	193.9	P	158.3	M	195.9	P	gb:NM_152791.2 /DB_XREF=gi:23592245 /TID=Hs2.351346.1 /CNT=5 /FEA=FLmRNA /TIER=FL /STK=1 /LL=148254 /UG_GENE=MGC26707 /UG=Hs.351346 /UG_TITLE=hypothetical protein MGC26707 /DEF=Homo sapiens hypothetical protein MGC26707 (MGC26707), mRNA. /FL=gb:NM_152791.2
1553288_a_at	172	P	98.9	A	124.1	A	93.6	A	87.7	A	97.7	A	172.8	A	76.4	M	138	P	159.7	P	148.8	A	83.7	M	gb:NM_173564.1 /DB_XREF=gi:27734862 /TID=Hs2.320086.1 /CNT=5 /FEA=FLmRNA /TIER=FL /STK=1 /LL=222950 /UG_GENE=FLJ37538 /UG=Hs.320086 /UG_TITLE=hypothetical protein FLJ37538 /DEF=Homo sapiens hypothetical protein FLJ37538 (FLJ37538), mRNA. /FL=gb:NM_173564.1
1553292_s_at	23.1	A	41.2	A	15.8	A	370.8	P	83.8	M	106.7	A	43.2	A	65.1	A	79.8	M	206.8	P	56.4	M	95	P	gb:NM_144610.1 /DB_XREF=gi:21389410 /TID=Hs2.351173.1 /CNT=5 /FEA=FLmRNA /TIER=FL /STK=1 /LL=124923 /UG_GENE=FLJ25006 /UG=Hs.351173 /UG_TITLE=hypothetical protein FLJ25006 /DEF=Homo sapiens hypothetical protein FLJ25006 (FLJ25006), mRNA. /FL=gb:NM_144610.1
1553293_at	37.4	A	97.5	A	6.4	A	49	A	11.4	A	228.7	P	13138.2	P	141.5	P	764.4	P	115.8	A	102.1	A	1081.7	P	gb:NM_054031.1 /DB_XREF=gi:16876452 /GEN=MRGX3 /TID=Hs2.380177.1 /CNT=5 /FEA=FLmRNA /TIER=FL /STK=1 /LL=117195 /UG=Hs.380177 /DEF=Homo sapiens G protein-coupled receptor MRGX3 (MRGX3), mRNA. /PROD=G protein-coupled receptor MRGX3 /FL=gb:NM_054031.1
1553295_at	1.1	A	2.9	A	10.8	A	32.2	A	1.5	A	45.1	A	13.2	A	47.6	P	27.1	A	11.5	A	19.9	A	17	A	gb:NM_152555.1 /DB_XREF=gi:22749148 /TID=Hs2.376692.1 /CNT=4 /FEA=FLmRNA /TIER=FL /STK=1 /LL=154664 /UG_GENE=FLJ33876 /UG=Hs.376692 /UG_TITLE=hypothetical protein FLJ33876 /DEF=Homo sapiens hypothetical protein FLJ33876 (FLJ33876), mRNA. /FL=gb:NM_152555.1
1553296_at	62.2	A	9	A	85.8	A	29.7	A	35.9	A	39.4	A	31.8	A	42.9	A	91.8	A	18.6	A	73.2	A	96.9	A	gb:NM_032787.1 /DB_XREF=gi:14249453 /TID=Hs2.334511.1 /CNT=4 /FEA=FLmRNA /TIER=FL /STK=1 /LL=84873 /UG_GENE=GPR128 /UG=Hs.334511 /UG_TITLE=G protein-coupled receptor 128 /DEF=Homo sapiens G protein-coupled receptor 128 (GPR128), mRNA. /FL=gb:NM_032787.1
1553297_a_at	86	A	62.5	A	38.6	A	59.5	A	51.1	A	205.9	A	123.4	A	181.4	A	139.9	A	52.1	A	157.2	A	56.6	A	gb:NM_172313.1 /DB_XREF=gi:27437044 /GEN=CSF3R /TID=Hs2.2175.4 /CNT=4 /FEA=FLmRNA /TIER=FL /STK=1 /LL=1441 /UG=Hs.2175 /DEF=Homo sapiens colony stimulating factor 3 receptor (granulocyte) (CSF3R), transcript variant 4, mRNA. /PROD=colony stimulating factor 3 receptor isoform dprecursor /FL=gb:NM_172313.1
1553298_at	8.3	A	9.6	A	3.1	A	31.3	P	3.4	A	3.4	A	46.9	A	1.4	A	1.6	A	5.7	A	25	A	4.8	A	gb:NM_152460.1 /DB_XREF=gi:22748970 /TID=Hs2.350775.1 /CNT=4 /FEA=FLmRNA /TIER=FL /STK=1 /LL=146723 /UG_GENE=FLJ31882 /UG=Hs.350775 /UG_TITLE=hypothetical protein FLJ31882 /DEF=Homo sapiens hypothetical protein FLJ31882 (FLJ31882), mRNA. /FL=gb:NM_152460.1
1553299_at	5.3	A	2	A	50.8	A	3.3	A	21.2	A	109.5	A	128.8	A	2.4	A	113.8	A	75.8	A	5.5	A	83.7	A	gb:NM_152664.1 /DB_XREF=gi:22749348 /TID=Hs2.350814.1 /CNT=4 /FEA=FLmRNA /TIER=FL /STK=1 /LL=200107 /UG_GENE=FLJ31401 /UG=Hs.350814 /UG_TITLE=hypothetical protein FLJ31401 /DEF=Homo sapiens hypothetical protein FLJ31401 (FLJ31401), mRNA. /FL=gb:NM_152664.1
1553300_a_at	78.9	A	110.6	P	55.2	A	92.6	A	13.6	A	12.1	A	56.4	A	24.7	A	119.2	A	5.1	A	77.8	A	79	A	gb:NM_152910.1 /DB_XREF=gi:23097261 /TID=Hs2.378969.1 /CNT=4 /FEA=FLmRNA /TIER=FL /STK=1 /LL=160851 /UG_GENE=DKFZp761I1510 /UG=Hs.378969 /UG_TITLE=hypothetical protein DKFZp761I1510 /DEF=Homo sapiens hypothetical protein DKFZp761I1510 (DKFZp761I1510), mRNA. /FL=gb:NM_152910.1
1553301_a_at	118.7	P	101.3	A	163.9	P	242.1	P	124.9	P	283.8	P	175	A	102.1	P	77.7	A	82.2	A	125.6	P	62.6	A	gb:NM_144632.1 /DB_XREF=gi:21389460 /TID=Hs2.293204.1 /CNT=4 /FEA=FLmRNA /TIER=FL /STK=1 /LL=130827 /UG_GENE=FLJ30294 /UG=Hs.293204 /UG_TITLE=hypothetical protein FLJ30294 /DEF=Homo sapiens hypothetical protein FLJ30294 (FLJ30294), mRNA. /FL=gb:NM_144632.1
1553303_at	20.3	A	119.7	A	141.8	A	25.9	A	13.1	A	122.6	A	35	A	29.6	A	78.9	A	65.8	A	37.1	A	89.6	A	gb:NM_152337.1 /DB_XREF=gi:22748734 /TID=Hs2.326864.1 /CNT=4 /FEA=FLmRNA /TIER=FL /STK=1 /LL=123775 /UG_GENE=FLJ32702 /UG=Hs.326864 /UG_TITLE=hypothetical protein FLJ32702 /DEF=Homo sapiens hypothetical protein FLJ32702 (FLJ32702), mRNA. /FL=gb:NM_152337.1
1553304_at	77.9	A	87.6	A	57.8	A	161.6	A	89.9	A	148.7	A	27.7	A	137.8	A	196.6	A	125.9	A	154.9	A	119.8	A	gb:NM_144703.1 /DB_XREF=gi:21389608 /TID=Hs2.158470.1 /CNT=4 /FEA=FLmRNA /TIER=FL /STK=1 /LL=149986 /UG_GENE=FLJ25473 /UG=Hs.158470 /UG_TITLE=hypothetical protein FLJ25473 /DEF=Homo sapiens hypothetical protein FLJ25473 (FLJ25473), mRNA. /FL=gb:NM_144703.1
1553306_at	25.7	A	107.7	A	16.8	A	131.5	A	117.3	A	99.6	A	117.7	A	20.7	A	21.2	A	122.8	A	18.2	A	168	A	gb:NM_033358.1 /DB_XREF=gi:15718711 /GEN=CASP8 /TID=Hs2.381231.5 /CNT=4 /FEA=FLmRNA /TIER=FL /STK=1 /LL=841 /UG=Hs.381231 /DEF=Homo sapiens caspase 8, apoptosis-related cysteine protease (CASP8), transcript variant E, mRNA. /PROD=caspase 8, isoform E /FL=gb:NM_033358.1
1553310_at	32	A	36.5	A	18.6	A	2.9	A	8.2	A	20.6	A	35.4	A	30.1	A	27.2	A	19.9	A	52.8	A	53.5	A	gb:NM_153021.1 /DB_XREF=gi:23308542 /TID=Hs2.351007.1 /CNT=4 /FEA=FLmRNA /TIER=FL /STK=1 /LL=151056 /UG_GENE=FLJ30866 /UG=Hs.351007 /UG_TITLE=hypothetical protein FLJ30866 /DEF=Homo sapiens hypothetical protein FLJ30866 (FLJ30866), mRNA. /FL=gb:NM_153021.1
1553311_at	6.5	A	34.1	A	1	A	3.5	A	5.7	A	12.4	A	18.2	A	3	A	52.6	A	46.9	A	3.4	A	6.4	A	gb:NM_173644.1 /DB_XREF=gi:27735086 /TID=Hs2.171076.1 /CNT=4 /FEA=FLmRNA /TIER=FL /STK=1 /LL=284756 /UG_GENE=FLJ33860 /UG=Hs.171076 /UG_TITLE=hypothetical protein FLJ33860 /DEF=Homo sapiens hypothetical protein FLJ33860 (FLJ33860), mRNA. /FL=gb:NM_173644.1
1553313_s_at	221.8	A	302.8	A	840.9	P	174.9	A	413.1	P	455.5	P	599.3	P	142.5	A	263.8	M	955.8	P	288.1	A	1107.9	P	gb:NM_006933.1 /DB_XREF=gi:5902091 /GEN=SLC5A3 /TID=Hs2.421196.1 /CNT=4 /FEA=FLmRNA /TIER=FL /STK=1 /LL=6526 /UG=Hs.421196 /DEF=Homo sapiens solute carrier family 5 (inositol transporters), member 3 (SLC5A3), mRNA. /PROD=solute carrier family 5 (inositol transporters),member 3 /FL=gb:NM_006933.1
1553314_a_at	55.4	A	59.3	A	16.4	A	4.2	A	11.3	A	19.9	A	34.5	A	18.6	A	29.5	A	17	A	16.1	A	13	A	gb:NM_153209.1 /DB_XREF=gi:23397457 /TID=Hs2.372773.1 /CNT=4 /FEA=FLmRNA /TIER=FL /STK=1 /LL=124602 /UG_GENE=FLJ37300 /UG=Hs.372773 /UG_TITLE=hypothetical protein FLJ37300 /DEF=Homo sapiens hypothetical protein FLJ37300 (FLJ37300), mRNA. /FL=gb:NM_153209.1
1553315_at	41	A	44.6	A	53	A	68.5	P	70.9	A	94.1	A	13.8	A	39.9	A	30	A	34.7	A	41.5	A	25.7	A	gb:NM_144990.1 /DB_XREF=gi:21450688 /TID=Hs2.406736.1 /CNT=4 /FEA=FLmRNA /TIER=FL /STK=1 /LL=200172 /UG_GENE=FLJ23878 /UG=Hs.406736 /UG_TITLE=hypothetical protein FLJ23878 /DEF=Homo sapiens hypothetical protein FLJ23878 (FLJ23878), mRNA. /FL=gb:NM_144990.1
1553316_at	105	A	73.8	A	34.2	A	29	A	9.9	A	27.6	A	270.1	A	113.2	A	69.5	A	59.7	A	69	A	47.8	A	gb:NM_080817.1 /DB_XREF=gi:18201869 /GEN=GPR82 /TID=Hs2.352219.1 /CNT=4 /FEA=FLmRNA /TIER=FL /STK=1 /LL=27197 /UG=Hs.352219 /DEF=Homo sapiens G protein-coupled receptor 82 (GPR82), mRNA. /PROD=G protein-coupled receptor 82 /FL=gb:NM_080817.1
1553317_s_at	6.5	A	31.7	A	18.3	A	13.1	A	44.5	A	3	A	20.8	A	3.2	A	12.9	A	34.9	A	2.7	A	40.5	A	gb:AL832460.1 /DB_XREF=gi:21733026 /TID=Hs2.352219.1 /CNT=4 /FEA=FLmRNA /TIER=ConsEnd /STK=0 /LL=27197 /UG_GENE=GPR82 /UG=Hs.352219 /UG_TITLE=G protein-coupled receptor 82 /DEF=Homo sapiens mRNA; cDNA DKFZp313N2416 (from clone DKFZp313N2416). /FL=gb:NM_080817.1
1553318_at	239.1	A	103	A	23.7	A	85.4	A	75.8	A	26	A	203.1	A	22.3	A	99.5	A	29	A	218.7	A	151.7	A	gb:NM_144968.1 /DB_XREF=gi:21450658 /TID=Hs2.351743.1 /CNT=4 /FEA=FLmRNA /TIER=FL /STK=1 /LL=158787 /UG_GENE=FLJ32783 /UG=Hs.351743 /UG_TITLE=hypothetical protein FLJ32783 /DEF=Homo sapiens hypothetical protein FLJ32783 (FLJ32783), mRNA. /FL=gb:NM_144968.1
1553319_at	32.1	A	44	A	15.3	A	7.4	A	16.2	A	16.7	A	30.8	A	9	A	40	A	12.1	A	7.6	A	12.5	A	gb:AF370886.1 /DB_XREF=gi:21728283 /GEN=GPR99 /TID=Hs2.352218.1 /CNT=4 /FEA=FLmRNA /TIER=FL /STK=1 /LL=27199 /UG=Hs.352218 /DEF=Homo sapiens G protein-coupled receptor GPR99 (GPR99) mRNA, complete cds. /PROD=G protein-coupled receptor GPR99 /FL=gb:AF370886.1 gb:NM_080818.1
1553320_s_at	47.7	A	23.1	A	1.2	A	20.8	A	4.7	A	11.4	A	9.7	A	1.6	A	1	A	1	A	1.4	A	2.1	A	gb:NM_152627.1 /DB_XREF=gi:22749280 /TID=Hs2.438589.1 /CNT=3 /FEA=FLmRNA /TIER=FL /STK=1 /LL=168448 /UG_GENE=MGC26484 /UG=Hs.438589 /UG_TITLE=hypothetical protein MGC26484 /DEF=Homo sapiens hypothetical protein MGC26484 (MGC26484), mRNA. /FL=gb:NM_152627.1
1553321_a_at	101.6	A	82.2	A	58.9	A	18.4	A	42.1	A	50.6	A	71.1	A	7.6	A	61.1	A	104.1	A	77.2	A	52.7	A	gb:NM_006588.2 /DB_XREF=gi:28830307 /GEN=SULT1C2 /TID=Hs2.312644.1 /CNT=3 /FEA=FLmRNA /TIER=FL /STK=1 /UG=Hs.312644 /DEF=Homo sapiens sulfotransferase family, cytosolic, 1C, member 2 (SULT1C2), mRNA. /PROD=sulfotransferase family, cytosolic, 1C, member2 /FL=gb:NM_006588.2
1553322_s_at	68	A	44.6	A	144.1	P	255.6	P	260	P	209.8	P	224.4	A	83.2	P	118.9	P	168.6	P	132.7	P	136.9	P	gb:NM_021961.1 /DB_XREF=gi:11386150 /GEN=TEAD1 /TID=Hs2.42458.1 /CNT=3 /FEA=FLmRNA /TIER=FL /STK=1 /LL=7003 /UG=Hs.42458 /DEF=Homo sapiens TEA domain family member 1 (SV40 transcriptional enhancer factor) (TEAD1), mRNA. /PROD=TEA domain family member 1 (SV40 transcriptionalenhancer factor) /FL=gb:NM_021961.1
1553323_a_at	51.6	A	35.7	A	220.9	P	64.7	A	76.9	A	125.6	A	123	A	22.1	A	35.9	A	66.1	A	119.9	A	73.7	A	gb:AF411819.1 /DB_XREF=gi:16566358 /TID=Hs2.131905.3 /CNT=6 /FEA=FLmRNA /TIER=FL /STK=1 /LL=117155 /UG_GENE=CATSPER2 /UG=Hs.131905 /DEF=Homo sapiens putative ion channel protein CATSPER2 variant 3 mRNA, complete cds. /PROD=putative ion channel protein CATSPER2 variant 3 /FL=gb:NM_172096.1 gb:AF411819.1
1553325_at	81.1	A	38.4	A	78.9	A	15.1	A	9	A	57	A	175	A	168	A	37.5	A	166.1	M	126.1	A	76	A	gb:BC029532.1 /DB_XREF=gi:20809619 /TID=Hs2.374727.1 /CNT=6 /FEA=FLmRNA /TIER=FL /STK=1 /LL=134187 /UG_GENE=FLJ25680 /UG=Hs.374727 /DEF=Homo sapiens, similar to data source:SPTR, source key:P56225, evidence:ISS~homolog to SPERM 1 POU-DOMAIN TRANSCRIPTION FACTOR (SPRM-1)~putative, clone MGC:33931 IMAGE:5295125, mRNA, complete cds. /PROD=similar to data source:SPTR, source key:P56225,evidence:ISS h…
1553326_at	86.4	A	27.4	A	58.3	A	50.6	A	72.4	A	56.1	A	79.9	A	45.3	A	72.4	A	10.5	A	71.2	A	91.3	A	gb:AF453828.1 /DB_XREF=gi:18483167 /GEN=GREAT /TID=Hs2.348481.1 /CNT=5 /FEA=FLmRNA /TIER=FL /STK=1 /LL=122042 /UG=Hs.348481 /DEF=Homo sapiens G protein-coupled receptor affecting testicular descent (GREAT) mRNA, complete cds. /PROD=G protein-coupled receptor affecting testiculardescent /FL=gb:NM_130806.2 gb:AF453828.1 gb:AF403384.2
1553327_a_at	10.8	A	29.2	A	66.2	A	5.3	A	10.8	A	45.7	A	152.1	A	7.3	A	8.4	A	14.5	A	5.5	A	13.3	A	gb:NM_152751.1 /DB_XREF=gi:22749470 /TID=Hs2.376000.1 /CNT=5 /FEA=FLmRNA /TIER=FL /STK=1 /LL=222389 /UG_GENE=FLJ40283 /UG=Hs.376000 /UG_TITLE=hypothetical protein FLJ40283 /DEF=Homo sapiens hypothetical protein FLJ40283 (FLJ40283), mRNA. /FL=gb:NM_152751.1
1553328_a_at	97.4	A	72.2	A	15	A	7.2	A	19.1	A	21.1	A	109.2	A	5.2	A	72.4	A	10.8	A	34.1	A	22.3	A	gb:NM_003054.1 /DB_XREF=gi:4506988 /GEN=SLC18A2 /TID=Hs2.1813.1 /CNT=5 /FEA=FLmRNA /TIER=FL /STK=1 /LL=6571 /UG=Hs.1813 /DEF=Homo sapiens solute carrier family 18 (vesicular monoamine), member 2 (SLC18A2), mRNA. /PROD=solute carrier family 18 (vesicular monoamine),member 2 /FL=gb:NM_003054.1 gb:L23205.1 gb:L14269.1 gb:L09118.1
1553329_at	48.9	A	77.4	A	50	A	49.3	A	33.5	A	8.6	A	34.3	A	33.1	A	89.2	A	76.2	A	44.4	A	38.2	P	gb:BC017587.1 /DB_XREF=gi:17068416 /TID=Hs2.351816.1 /CNT=5 /FEA=FLmRNA /TIER=FL /STK=1 /LL=136263 /UG_GENE=LOC136263 /UG=Hs.351816 /DEF=Homo sapiens, clone MGC:26614 IMAGE:4838989, mRNA, complete cds. /PROD=Unknown (protein for MGC:26614) /FL=gb:BC017587.1 gb:NM_145268.2
1553330_at	14.1	A	76.5	A	16	A	29.6	A	38.2	A	6.1	A	22.9	A	6.8	A	11.2	A	13.8	A	9.7	A	72.9	A	gb:NM_145268.2 /DB_XREF=gi:24432075 /TID=Hs2.351816.1 /CNT=5 /FEA=FLmRNA /TIER=FL /STK=1 /LL=136263 /UG_GENE=LOC136263 /UG=Hs.351816 /UG_TITLE=LOC136263 /DEF=Homo sapiens LOC136263 (LOC136263), mRNA. /FL=gb:BC017587.1 gb:NM_145268.2
1553333_at	6.2	A	13.8	A	2.2	A	34.3	A	3.4	A	5.7	A	20.2	A	22	A	5.2	A	3.4	A	26.6	A	4.4	A	gb:NM_152367.1 /DB_XREF=gi:22748790 /TID=Hs2.376194.1 /CNT=4 /FEA=FLmRNA /TIER=FL /STK=1 /LL=126868 /UG_GENE=FLJ38716 /UG=Hs.376194 /UG_TITLE=hypothetical protein FLJ38716 /DEF=Homo sapiens hypothetical protein FLJ38716 (FLJ38716), mRNA. /FL=gb:NM_152367.1
1553335_x_at	112.4	A	10.4	A	59.1	A	17.4	A	50.8	A	66.2	A	115.1	A	67.4	A	12.3	A	124.4	A	49	A	29.8	A	gb:NM_173669.1 /DB_XREF=gi:27734690 /TID=Hs2.353515.1 /CNT=4 /FEA=FLmRNA /TIER=FL /STK=1 /LL=285696 /UG_GENE=FLJ34047 /UG=Hs.353515 /UG_TITLE=hypothetical protein FLJ34047 /DEF=Homo sapiens hypothetical protein FLJ34047 (FLJ34047), mRNA. /FL=gb:NM_173669.1
1553336_a_at	177.5	A	203	A	170.7	A	168.9	A	213	A	210.9	A	216	A	82.4	A	112.7	A	239.8	A	229.2	M	23.8	A	gb:NM_152622.1 /DB_XREF=gi:22749272 /TID=Hs2.419195.1 /CNT=4 /FEA=FLmRNA /TIER=FL /STK=1 /LL=166968 /UG_GENE=FLJ35954 /UG=Hs.419195 /UG_TITLE=hypothetical protein FLJ35954 /DEF=Homo sapiens hypothetical protein FLJ35954 (FLJ35954), mRNA. /FL=gb:NM_152622.1
1553338_at	146.9	A	326.9	P	387.6	P	1031.1	P	686.1	P	648	P	412.2	A	236.6	P	399	P	488.3	P	261	P	178.9	P	gb:NM_152608.1 /DB_XREF=gi:22749244 /TID=Hs2.99210.1 /CNT=4 /FEA=FLmRNA /TIER=FL /STK=1 /LL=163859 /UG_GENE=FLJ35382 /UG=Hs.99210 /UG_TITLE=hypothetical protein FLJ35382 /DEF=Homo sapiens hypothetical protein FLJ35382 (FLJ35382), mRNA. /FL=gb:NM_152608.1
1553340_s_at	49.7	A	84.4	A	31.6	A	142.6	A	20.2	A	12.9	A	266.7	A	118.6	A	39.8	A	46.2	A	41.5	A	44.4	A	gb:NM_054028.1 /DB_XREF=gi:16876446 /GEN=AMAC /TID=Hs2.350567.1 /CNT=4 /FEA=FLmRNA /TIER=FL /STK=1 /LL=83650 /UG=Hs.350567 /DEF=Homo sapiens acyl-malonyl condensing enzyme (AMAC), mRNA. /PROD=acyl-malonyl condensing enzyme /FL=gb:NM_054028.1
1553341_at	18.2	A	69.2	A	14.1	A	12	A	42.7	A	19.1	A	177.6	A	11.6	A	15.9	A	11	A	14.1	A	49.7	A	gb:NM_144639.1 /DB_XREF=gi:21389466 /TID=Hs2.331148.1 /CNT=4 /FEA=FLmRNA /TIER=FL /STK=1 /LL=131669 /UG_GENE=FLJ31300 /UG=Hs.331148 /UG_TITLE=hypothetical protein FLJ31300 /DEF=Homo sapiens hypothetical protein FLJ31300 (FLJ31300), mRNA. /FL=gb:NM_144639.1
1553344_at	2.9	A	4.7	A	1.5	A	2	A	2.1	A	2.7	A	6	A	1.7	A	4.6	A	2.1	A	2.5	A	3.3	A	gb:AY029205.1 /DB_XREF=gi:15072440 /GEN=PCDH15 /TID=Hs2.232819.1 /CNT=3 /FEA=FLmRNA /TIER=FL /STK=1 /LL=65217 /UG=Hs.232819 /DEF=Homo sapiens protocadherin 15 (PCDH15) mRNA, complete cds. /PROD=protocadherin 15 /FL=gb:AY029205.1 gb:AY029237.1 gb:NM_033056.2
1553346_a_at	208.6	A	208.2	A	121.6	A	398	A	255.4	P	254.9	M	236.1	A	355.3	A	129.6	A	185.8	M	290.6	A	159.5	A	gb:NM_020847.1 /DB_XREF=gi:21702732 /GEN=TNRC6 /TID=Hs2.6968.2 /CNT=3 /FEA=FLmRNA /TIER=FL /STK=1 /LL=27327 /UG=Hs.6968 /DEF=Homo sapiens trinucleotide repeat containing 6 (TNRC6), mRNA. /PROD=trinucleotide repeat containing 6 /FL=gb:NM_020847.1
1553347_s_at	153.2	A	178.1	A	53.5	A	16.6	A	23.5	A	19	A	225.5	A	13.5	A	256.6	A	27.1	A	30.6	A	173.1	A	gb:NM_002235.2 /DB_XREF=gi:25952089 /GEN=KCNA6 /TID=Hs2.391581.1 /CNT=3 /FEA=FLmRNA /TIER=FL /STK=1 /LL=3742 /UG=Hs.391581 /DEF=Homo sapiens potassium voltage-gated channel, shaker-related subfamily, member 6 (KCNA6), mRNA. /PROD=potassium voltage-gated channel, shaker-relatedsubfamily, member 6 /FL=gb:NM_002235.2
1553348_a_at	396.4	A	338	A	725.4	P	742.8	P	489	P	298.4	A	525.2	A	282.7	P	253.3	A	394.6	A	262.3	A	396.6	A	gb:NM_147133.1 /DB_XREF=gi:22212924 /GEN=NFX1 /TID=Hs2.3187.3 /CNT=3 /FEA=FLmRNA /TIER=FL /STK=1 /LL=4799 /UG=Hs.3187 /DEF=Homo sapiens nuclear transcription factor, X-box binding 1 (NFX1), transcript variant 2, mRNA. /PROD=nuclear transcription factor, X-box binding 1isoform 2 /FL=gb:NM_147133.1 gb:AF332009.1
1553349_at	84.6	A	15.1	A	33	A	73.1	P	114.2	P	7.4	A	76.8	A	150	M	48.3	A	8	A	81.2	A	53.7	A	gb:NM_152641.1 /DB_XREF=gi:22749308 /TID=Hs2.379904.1 /CNT=3 /FEA=FLmRNA /TIER=FL /STK=1 /LL=196528 /UG_GENE=FLJ30619 /UG=Hs.379904 /UG_TITLE=hypothetical protein FLJ30619 /DEF=Homo sapiens hypothetical protein FLJ30619 (FLJ30619), mRNA. /FL=gb:NM_152641.1
1553350_at	30.6	A	174.7	A	148.4	A	11.6	A	59.7	A	36.5	A	264.4	A	18.5	A	101.9	A	153	A	120.7	A	171.9	A	gb:NM_152698.1 /DB_XREF=gi:22749392 /TID=Hs2.376218.1 /CNT=3 /FEA=FLmRNA /TIER=FL /STK=1 /LL=205147 /UG_GENE=FLJ38377 /UG=Hs.376218 /UG_TITLE=hypothetical protein FLJ38377 /DEF=Homo sapiens hypothetical protein FLJ38377 (FLJ38377), mRNA. /FL=gb:NM_152698.1
1553351_at	19.8	A	36	A	108.8	A	38.3	A	61.1	A	34.4	A	23.2	A	40.8	A	84.6	A	82.9	A	87.9	A	109.9	A	gb:NM_130901.1 /DB_XREF=gi:18702330 /GEN=LOC161725 /TID=Hs2.355236.1 /CNT=3 /FEA=FLmRNA /TIER=FL /STK=1 /LL=161725 /UG=Hs.355236 /DEF=Homo sapiens cezanne 2 (LOC161725), mRNA. /PROD=cezanne 2 /FL=gb:NM_130901.1
1553352_x_at	211.4	A	294.1	A	143	A	154.8	A	113.2	A	237.1	A	123.6	A	159.3	A	194.4	A	217.7	A	162	A	291.9	A	gb:AF513360.1 /DB_XREF=gi:21326140 /TID=Hs2Affx.1.9 /CNT=3 /FEA=FLmRNA /TIER=FL /STK=1 /NOTE=sequence(s) not in UniGene /DEF=Homo sapiens enverin mRNA, complete cds. /PROD=enverin /FL=gb:AF208161.1 gb:NM_014590.2 gb:AF513360.1
1553354_a_at	19	A	143.4	A	120.5	A	69.9	P	73.9	A	83.4	A	56.6	A	98.1	A	99.1	A	79.6	A	8.9	A	156.3	A	gb:NM_153030.1 /DB_XREF=gi:23308508 /TID=Hs2.138430.1 /CNT=3 /FEA=FLmRNA /TIER=FL /STK=1 /LL=143153 /UG_GENE=FLJ31958 /UG=Hs.138430 /UG_TITLE=hypothetical protein FLJ31958 /DEF=Homo sapiens hypothetical protein FLJ31958 (FLJ31958), mRNA. /FL=gb:NM_153030.1
1553355_at	182.1	A	68.7	A	11.8	A	14.4	A	23	A	32.6	A	23	A	46.6	A	10.8	A	16.7	A	38.8	A	12.4	A	gb:NM_153019.1 /DB_XREF=gi:23308534 /TID=Hs2.194750.1 /CNT=3 /FEA=FLmRNA /TIER=FL /STK=1 /LL=150319 /UG_GENE=FLJ30744 /UG=Hs.194750 /UG_TITLE=hypothetical protein FLJ30744 /DEF=Homo sapiens hypothetical protein FLJ30744 (FLJ30744), mRNA. /FL=gb:NM_153019.1
1553356_at	6	A	2.1	A	16.1	A	48	A	7	A	2.4	A	68	A	31.4	A	5.7	A	5.9	A	13.4	A	33	A	gb:NM_053057.2 /DB_XREF=gi:20270213 /TID=Hs2.350582.1 /CNT=3 /FEA=FLmRNA /TIER=FL /STK=1 /LL=114138 /UG_GENE=PRO0902 /UG=Hs.350582 /UG_TITLE=hypothetical protein PRO0902 /DEF=Homo sapiens hypothetical protein PRO0902 (PRO0902), mRNA. /FL=gb:NM_053057.2
1553357_at	49.1	A	19.1	A	9.4	A	23	A	25	A	9.3	A	111.5	A	45.9	M	58.4	A	41.9	A	8.3	A	73.1	M	gb:NM_153016.1 /DB_XREF=gi:23308554 /TID=Hs2.311352.1 /CNT=3 /FEA=FLmRNA /TIER=FL /STK=1 /LL=158696 /UG_GENE=FLJ30672 /UG=Hs.311352 /UG_TITLE=hypothetical protein FLJ30672 /DEF=Homo sapiens hypothetical protein FLJ30672 (FLJ30672), mRNA. /FL=gb:NM_153016.1
1553359_at	157.6	A	136.4	A	105.9	A	51.8	A	155.1	A	105	A	59.4	A	57	A	100	A	69.7	A	138.5	A	42.7	A	gb:NM_024963.2 /DB_XREF=gi:21361980 /TID=Hs2.287418.1 /CNT=3 /FEA=FLmRNA /TIER=FL /STK=1 /LL=80028 /UG_GENE=FLJ11467 /UG=Hs.287418 /UG_TITLE=hypothetical protein FLJ11467 /DEF=Homo sapiens hypothetical protein FLJ11467 (FLJ11467), mRNA. /FL=gb:NM_024963.2
1553361_x_at	93.8	A	76.1	A	44.5	A	70.1	A	96.8	A	45.5	A	75.6	A	67.1	A	86.8	A	56.9	A	81.6	A	61.6	A	gb:NM_024963.2 /DB_XREF=gi:21361980 /TID=Hs2.287418.1 /CNT=3 /FEA=FLmRNA /TIER=FL /STK=1 /LL=80028 /UG_GENE=FLJ11467 /UG=Hs.287418 /UG_TITLE=hypothetical protein FLJ11467 /DEF=Homo sapiens hypothetical protein FLJ11467 (FLJ11467), mRNA. /FL=gb:NM_024963.2
1553362_at	44.1	A	1.7	A	3.2	A	5.6	A	10.6	A	2	A	5.8	A	4.6	A	11.3	A	2.1	A	7.8	A	17.1	A	gb:NM_173645.1 /DB_XREF=gi:27735076 /TID=Hs2.376334.1 /CNT=3 /FEA=FLmRNA /TIER=FL /STK=1 /LL=284944 /UG_GENE=FLJ37357 /UG=Hs.376334 /UG_TITLE=hypothetical protein FLJ37357 /DEF=Homo sapiens hypothetical protein FLJ37357 (FLJ37357), mRNA. /FL=gb:NM_173645.1
1553363_at	11.2	A	35.6	A	14.6	A	64.6	A	50.9	A	31.9	A	36.2	A	5.7	A	36	A	19.7	A	113.1	A	58.3	A	gb:NM_152554.1 /DB_XREF=gi:22749154 /TID=Hs2.350772.1 /CNT=3 /FEA=FLmRNA /TIER=FL /STK=1 /LL=154386 /UG_GENE=FLJ31934 /UG=Hs.350772 /UG_TITLE=hypothetical protein FLJ31934 /DEF=Homo sapiens hypothetical protein FLJ31934 (FLJ31934), mRNA. /FL=gb:NM_152554.1
1553364_at	45.9	A	52.2	A	36.4	A	94.9	A	8.6	A	8.9	A	134	A	90.8	A	2.6	A	50	A	106.4	A	61.5	A	gb:NM_173676.1 /DB_XREF=gi:27734926 /TID=Hs2.407002.1 /CNT=3 /FEA=FLmRNA /TIER=FL /STK=1 /LL=285848 /UG_GENE=FLJ38755 /UG=Hs.407002 /UG_TITLE=hypothetical protein FLJ38755 /DEF=Homo sapiens hypothetical protein FLJ38755 (FLJ38755), mRNA. /FL=gb:NM_173676.1
1553365_at	166.3	A	75.4	A	5.6	A	89.3	M	64.2	A	52.1	A	28.4	A	1.4	A	64.9	A	64	A	5.3	A	62.9	A	gb:NM_152317.1 /DB_XREF=gi:22748694 /TID=Hs2.125697.1 /CNT=3 /FEA=FLmRNA /TIER=FL /STK=1 /LL=120863 /UG_GENE=FLJ33505 /UG=Hs.125697 /UG_TITLE=hypothetical protein FLJ33505 /DEF=Homo sapiens hypothetical protein FLJ33505 (FLJ33505), mRNA. /FL=gb:NM_152317.1
1553366_s_at	36.3	A	28.6	A	16.4	A	42.5	A	73.3	A	47.7	A	247.9	A	19.4	A	29.6	A	122.7	A	45	A	32.1	A	gb:NM_144994.4 /DB_XREF=gi:28827787 /GEN=DARP /TID=Hs2.376569.1 /CNT=3 /FEA=FLmRNA /TIER=FL /STK=1 /LL=200539 /UG=Hs.376569 /DEF=Homo sapiens diabetes related ankyrin repeat protein (DARP), mRNA. /PROD=diabetes related ankyrin repeat protein /FL=gb:NM_144994.4 gb:AF492401.1
1553367_a_at	206.6	A	113.1	A	232.8	A	140.5	A	127.8	A	210.2	A	473.2	A	111.3	A	320	A	477.2	A	250.1	A	196.3	A	gb:NM_144613.1 /DB_XREF=gi:21389424 /TID=Hs2.343765.1 /CNT=3 /FEA=FLmRNA /TIER=FL /STK=1 /LL=125965 /UG_GENE=FLJ32865 /UG=Hs.343765 /UG_TITLE=hypothetical protein FLJ32865 /DEF=Homo sapiens hypothetical protein FLJ32865 (FLJ32865), mRNA. /FL=gb:NM_144613.1
1553369_at	19.2	A	25.6	A	17.1	A	10.3	A	11.8	A	11.8	A	56	A	37.8	A	20	A	26	A	58	A	18.2	A	gb:NM_173544.1 /DB_XREF=gi:27734912 /TID=Hs2.137319.1 /CNT=3 /FEA=FLmRNA /TIER=FL /STK=1 /LL=199786 /UG_GENE=FLJ39802 /UG=Hs.137319 /UG_TITLE=hypothetical protein FLJ39802 /DEF=Homo sapiens hypothetical protein FLJ39802 (FLJ39802), mRNA. /FL=gb:NM_173544.1
1553371_at	185.7	P	123.1	M	86	A	88.3	A	100.2	A	113.6	A	157.7	A	79.1	A	163.3	A	156.6	P	94.9	A	59.1	A	gb:NM_173641.1 /DB_XREF=gi:27735058 /TID=Hs2.376724.1 /CNT=3 /FEA=FLmRNA /TIER=FL /STK=1 /LL=284656 /UG_GENE=FLJ33655 /UG=Hs.376724 /UG_TITLE=hypothetical protein FLJ33655 /DEF=Homo sapiens hypothetical protein FLJ33655 (FLJ33655), mRNA. /FL=gb:NM_173641.1
1553372_at	12.2	A	17.6	A	6	A	3.8	A	15.4	A	7.5	A	85.5	A	3.9	A	30.1	A	7.1	A	28.5	A	14.1	A	gb:NM_152669.1 /DB_XREF=gi:22749354 /TID=Hs2.297397.1 /CNT=3 /FEA=FLmRNA /TIER=FL /STK=1 /LL=200317 /UG_GENE=FLJ23865 /UG=Hs.297397 /UG_TITLE=hypothetical protein FLJ23865 /DEF=Homo sapiens hypothetical protein FLJ23865 (FLJ23865), mRNA. /FL=gb:NM_152669.1
1553373_at	18.2	A	109.6	P	158.9	P	35.9	A	46.3	A	124	A	24.4	A	38.5	A	110.7	P	92.1	P	100	A	91.5	A	gb:NM_144625.1 /DB_XREF=gi:21389448 /TID=Hs2.350654.1 /CNT=3 /FEA=FLmRNA /TIER=FL /STK=1 /LL=128025 /UG_GENE=FLJ32978 /UG=Hs.350654 /UG_TITLE=hypothetical protein FLJ32978 /DEF=Homo sapiens hypothetical protein FLJ32978 (FLJ32978), mRNA. /FL=gb:NM_144625.1
1553374_at	4.6	A	6.1	A	11.4	A	11.5	A	10.2	A	10.5	A	10.7	A	12.5	A	6	A	54.5	A	46.9	A	8.6	A	gb:NM_018544.2 /DB_XREF=gi:20591457 /TID=Hs2.283045.1 /CNT=3 /FEA=FLmRNA /TIER=FL /STK=1 /LL=55412 /UG_GENE=PRO2949 /UG=Hs.283045 /UG_TITLE=hypothetical protein PRO2949 /DEF=Homo sapiens hypothetical protein PRO2949 (PRO2949), mRNA. /FL=gb:NM_018544.2
1553375_at	82.7	A	116.7	A	62.4	A	11.8	A	70.2	A	113.2	A	119.4	A	137.1	A	15.4	A	63	A	134.7	A	39.6	A	gb:NM_152733.1 /DB_XREF=gi:23308690 /TID=Hs2.100256.1 /CNT=3 /FEA=FLmRNA /TIER=FL /STK=1 /LL=114781 /UG_GENE=KIAA1880 /UG=Hs.100256 /UG_TITLE=KIAA1880 protein /DEF=Homo sapiens KIAA1880 protein (KIAA1880), mRNA. /FL=gb:NM_152733.1
1553376_a_at	2.5	A	46.6	A	51.2	A	6.7	A	41.2	A	2.4	A	18	A	5.9	A	19.1	A	17.8	A	5.4	A	1.4	A	gb:NM_144619.1 /DB_XREF=gi:21389436 /TID=Hs2.350663.1 /CNT=3 /FEA=FLmRNA /TIER=FL /STK=1 /LL=126859 /UG_GENE=FLJ32940 /UG=Hs.350663 /UG_TITLE=hypothetical protein FLJ32940 /DEF=Homo sapiens hypothetical protein FLJ32940 (FLJ32940), mRNA. /FL=gb:NM_144619.1
1553378_a_at	67.5	A	119.2	A	14	A	39.2	A	77.4	A	16.8	A	135.2	A	54.5	A	72.5	A	14.9	A	90.1	A	65.5	A	gb:NM_152781.1 /DB_XREF=gi:22749528 /TID=Hs2.97152.1 /CNT=3 /FEA=FLmRNA /TIER=FL /STK=1 /LL=256957 /UG_GENE=FLJ32830 /UG=Hs.97152 /UG_TITLE=hypothetical protein FLJ32830 /DEF=Homo sapiens hypothetical protein FLJ32830 (FLJ32830), mRNA. /FL=gb:NM_152781.1
1553380_at	8.1	A	48.9	A	8.5	A	14.5	A	2.3	A	46.1	A	10.5	A	32.8	A	67.1	A	9.2	A	5.2	A	2.2	A	gb:NM_152615.1 /DB_XREF=gi:22749258 /TID=Hs2.120250.1 /CNT=3 /FEA=FLmRNA /TIER=FL /STK=1 /LL=165631 /UG_GENE=FLJ40597 /UG=Hs.120250 /UG_TITLE=hypothetical protein FLJ40597 /DEF=Homo sapiens hypothetical protein FLJ40597 (FLJ40597), mRNA. /FL=gb:NM_152615.1
1553383_at	5.3	A	4.8	A	8.2	A	1.2	A	5.6	A	7.8	A	19.4	A	35.7	A	8.4	A	2	A	6.2	A	6.8	A	gb:NM_152432.1 /DB_XREF=gi:22748914 /TID=Hs2.350682.1 /CNT=3 /FEA=FLmRNA /TIER=FL /STK=1 /LL=143872 /UG_GENE=FLJ32810 /UG=Hs.350682 /UG_TITLE=hypothetical protein FLJ32810 /DEF=Homo sapiens hypothetical protein FLJ32810 (FLJ32810), mRNA. /FL=gb:NM_152432.1
1553385_at	56	A	44.3	A	79.2	A	10.7	A	49.4	A	16.9	A	41.4	A	8.1	A	17.6	A	12.8	A	39.5	A	14	A	gb:NM_032845.1 /DB_XREF=gi:14249563 /TID=Hs2.334519.1 /CNT=3 /FEA=FLmRNA /TIER=FL /STK=1 /LL=84931 /UG_GENE=FLJ14816 /UG=Hs.334519 /UG_TITLE=hypothetical protein FLJ14816 /DEF=Homo sapiens hypothetical protein FLJ14816 (FLJ14816), mRNA. /FL=gb:NM_032845.1
1553386_at	29.2	A	92.3	A	73.5	A	22.6	A	105.9	A	65.5	A	54.9	A	74.1	A	114.3	A	103.6	A	103.6	A	109.6	A	gb:NM_032793.1 /DB_XREF=gi:14249465 /TID=Hs2.334513.1 /CNT=3 /FEA=FLmRNA /TIER=FL /STK=1 /LL=84879 /UG_GENE=FLJ14490 /UG=Hs.334513 /UG_TITLE=hypothetical protein FLJ14490 /DEF=Homo sapiens hypothetical protein FLJ14490 (FLJ14490), mRNA. /FL=gb:NM_032793.1
1553387_at	134	A	21.2	A	11.5	A	68	A	117.1	A	15.6	A	52	A	141.8	A	16	A	164.2	A	126.1	A	105.3	A	gb:NM_138293.1 /DB_XREF=gi:20336200 /GEN=ATM /TID=Hs2.194382.3 /CNT=3 /FEA=FLmRNA /TIER=FL /STK=1 /LL=472 /UG=Hs.194382 /DEF=Homo sapiens ataxia telangiectasia mutated (includes complementation groups A, C and D) (ATM), transcript variant 3, mRNA. /PROD=ataxia telangiectasia mutated protein isoform 3 /FL=gb:NM_138293.1
1553388_at	74.2	A	85.6	A	12.5	A	8.6	A	6.5	A	54.9	A	22.5	A	29.4	A	46.3	A	25.9	A	53.4	A	63.3	A	gb:NM_153036.1 /DB_XREF=gi:23308562 /TID=Hs2.350750.1 /CNT=3 /FEA=FLmRNA /TIER=FL /STK=1 /LL=221301 /UG_GENE=FLJ32239 /UG=Hs.350750 /UG_TITLE=hypothetical protein FLJ32239 /DEF=Homo sapiens hypothetical protein FLJ32239 (FLJ32239), mRNA. /FL=gb:NM_153036.1
1553389_at	23.1	A	113.8	A	58.5	A	39.1	A	5.3	A	15.8	A	57.5	A	16.7	A	48.4	A	4.9	A	80.7	A	50.5	A	gb:NM_152530.1 /DB_XREF=gi:22749106 /TID=Hs2.350824.1 /CNT=3 /FEA=FLmRNA /TIER=FL /STK=1 /LL=151602 /UG_GENE=FLJ31331 /UG=Hs.350824 /UG_TITLE=hypothetical protein FLJ31331 /DEF=Homo sapiens hypothetical protein FLJ31331 (FLJ31331), mRNA. /FL=gb:NM_152530.1
1553390_at	18.1	A	46.2	A	55.3	A	3.4	A	64.2	A	111.2	M	83.9	A	13.3	A	60.4	A	90.7	A	9.1	A	18.7	A	gb:NM_173681.1 /DB_XREF=gi:27735020 /TID=Hs2.376119.1 /CNT=3 /FEA=FLmRNA /TIER=FL /STK=1 /LL=285973 /UG_GENE=FLJ39415 /UG=Hs.376119 /UG_TITLE=hypothetical protein FLJ39415 /DEF=Homo sapiens hypothetical protein FLJ39415 (FLJ39415), mRNA. /FL=gb:NM_173681.1
1553391_at	14.5	A	23.9	A	11.6	A	5	A	6.2	A	5.8	A	30.1	A	6.1	A	3.9	A	4.1	A	14	A	4.2	A	gb:NM_152761.1 /DB_XREF=gi:22749496 /TID=Hs2.351265.1 /CNT=3 /FEA=FLmRNA /TIER=FL /STK=1 /LL=254158 /UG_GENE=FLJ25444 /UG=Hs.351265 /UG_TITLE=hypothetical protein FLJ25444 /DEF=Homo sapiens hypothetical protein FLJ25444 (FLJ25444), mRNA. /FL=gb:NM_152761.1
1553392_at	13	A	13.7	A	8.5	A	4	A	62.4	A	11.5	A	25.6	A	4.9	A	6.3	A	13.3	A	6.3	A	9.4	A	gb:NM_173503.1 /DB_XREF=gi:27735112 /TID=Hs2.152670.1 /CNT=3 /FEA=FLmRNA /TIER=FL /STK=1 /LL=146779 /UG_GENE=FLJ25818 /UG=Hs.152670 /UG_TITLE=hypothetical protein FLJ25818 /DEF=Homo sapiens hypothetical protein FLJ25818 (FLJ25818), mRNA. /FL=gb:NM_173503.1
1553394_a_at	171.1	P	232.6	P	47.9	A	38.9	A	17.3	A	14.5	A	584	P	54.9	A	41.4	A	318.7	P	67.6	A	33.5	A	gb:NM_003221.1 /DB_XREF=gi:4507442 /GEN=TFAP2B /TID=Hs2.33102.1 /CNT=3 /FEA=FLmRNA /TIER=FL /STK=1 /LL=7021 /UG=Hs.33102 /DEF=Homo sapiens transcription factor AP-2 beta (activating enhancer binding protein 2 beta) (TFAP2B), mRNA. /PROD=transcription factor AP-2 beta (activatingenhancer binding protein 2 beta) /FL=gb:NM_003221.1
1553395_a_at	401	M	303	P	132	A	120.7	A	214.7	A	361.4	M	201.4	A	196.8	A	346.4	A	234.5	A	218.2	A	246.9	A	gb:AF497548.1 /DB_XREF=gi:20258051 /TID=Hs2.372638.3 /CNT=3 /FEA=FLmRNA /TIER=FL /STK=1 /LL=131450 /UG_GENE=CD200R /UG=Hs.372638 /DEF=Homo sapiens CD200 cell surface glycoprotein receptor precursor variant 1 mRNA, complete cds, transcript variant 1. /PROD=CD200 cell surface glycoprotein receptorprecursor variant 1 /FL=gb:AF283760.1 gb:NM_170780.1 gb:AF497548.1
1553396_a_at	456.6	A	249.5	A	406.5	A	274.9	A	355.9	A	450.4	M	180.9	A	245.3	A	560.3	A	207.3	A	827.3	A	39.9	A	gb:NM_144719.1 /DB_XREF=gi:21389502 /TID=Hs2.351117.1 /CNT=3 /FEA=FLmRNA /TIER=FL /STK=1 /LL=152206 /UG_GENE=FLJ25467 /UG=Hs.351117 /UG_TITLE=hypothetical protein FLJ25467 /DEF=Homo sapiens hypothetical protein FLJ25467 (FLJ25467), mRNA. /FL=gb:NM_144719.1
1553397_at	400.9	A	262.5	A	201.9	A	48.6	A	263.4	A	179.1	A	304.9	A	274.8	A	413.9	A	308.8	A	287.4	A	262.2	A	gb:NM_144719.1 /DB_XREF=gi:21389502 /TID=Hs2.351117.1 /CNT=3 /FEA=FLmRNA /TIER=FL /STK=1 /LL=152206 /UG_GENE=FLJ25467 /UG=Hs.351117 /UG_TITLE=hypothetical protein FLJ25467 /DEF=Homo sapiens hypothetical protein FLJ25467 (FLJ25467), mRNA. /FL=gb:NM_144719.1
1553398_at	60.4	A	57	A	39.4	A	69.2	A	12.1	A	32.2	A	116.8	A	61.4	P	110.1	A	11.8	A	50.5	A	42.2	A	gb:NM_053012.2 /DB_XREF=gi:24475739 /TID=Hs2.312487.1 /CNT=3 /FEA=FLmRNA /TIER=FL /STK=1 /LL=114137 /UG_GENE=LOC114137 /UG=Hs.312487 /UG_TITLE=hypothetical protein LOC114137 /DEF=Homo sapiens hypothetical protein LOC114137 (LOC114137), mRNA. /FL=gb:NM_053012.2
1553399_a_at	138.4	A	50.3	A	249.1	A	80.1	A	135.9	A	118.8	A	47.5	A	194.8	A	107.4	A	71.3	A	168.9	A	64	A	gb:NM_152466.1 /DB_XREF=gi:22748982 /TID=Hs2.128813.1 /CNT=3 /FEA=FLmRNA /TIER=FL /STK=1 /LL=147081 /UG_GENE=FLJ25168 /UG=Hs.128813 /UG_TITLE=hypothetical protein FLJ25168 /DEF=Homo sapiens hypothetical protein FLJ25168 (FLJ25168), mRNA. /FL=gb:NM_152466.1
1553400_a_at	158.5	P	169.6	P	287.6	P	186.2	P	107.5	A	165.6	P	228.2	A	127.4	P	24	A	129.8	A	184.7	P	146.7	A	gb:NM_152466.1 /DB_XREF=gi:22748982 /TID=Hs2.128813.1 /CNT=3 /FEA=FLmRNA /TIER=FL /STK=1 /LL=147081 /UG_GENE=FLJ25168 /UG=Hs.128813 /UG_TITLE=hypothetical protein FLJ25168 /DEF=Homo sapiens hypothetical protein FLJ25168 (FLJ25168), mRNA. /FL=gb:NM_152466.1
1553401_at	53.6	A	70.1	A	43.3	P	1.8	A	60.2	A	120.3	M	126.1	A	16.4	A	72.8	A	46.2	A	74	A	83	P	gb:NM_147199.1 /DB_XREF=gi:22218356 /GEN=MRGX1 /TID=Hs2.350565.1 /CNT=3 /FEA=FLmRNA /TIER=FL /STK=1 /LL=259249 /UG=Hs.350565 /DEF=Homo sapiens G protein-coupled receptor MRGX1 (MRGX1), mRNA. /PROD=G protein-coupled receptor MRGX1 /FL=gb:NM_147199.1
1553402_a_at	46.1	M	124	P	61.1	P	6.1	A	34.6	A	65	A	15.4	A	96.6	P	42.6	A	88.8	P	90	A	50.6	A	gb:NM_139011.1 /DB_XREF=gi:21040356 /GEN=HFE /TID=Hs2.20019.10 /CNT=3 /FEA=FLmRNA /TIER=FL /STK=1 /LL=3077 /UG=Hs.20019 /DEF=Homo sapiens hemochromatosis (HFE), transcript variant 11, mRNA. /PROD=hemochromatosis protein isoform 11 precursor /FL=gb:NM_139011.1
1553403_at	16.7	A	27.4	A	10.1	A	5.9	A	7.3	A	18.5	A	34.4	A	5.2	A	44.6	A	7.5	A	9.6	A	6.3	A	gb:AB076563.1 /DB_XREF=gi:27372864 /GEN=insl7 /TID=Hs2.352155.1 /CNT=3 /FEA=FLmRNA /TIER=FL /STK=1 /LL=117579 /UG=Hs.352155 /DEF=Homo sapiens insl7 mRNA for insulin-like 7, complete cds. /PROD=insulin-like 7 /FL=gb:NM_080864.1 gb:AF447451.1 gb:AB076563.1
1553405_a_at	55.8	A	7.8	A	12.7	A	29.3	A	135.9	P	51.9	A	122	A	16.6	A	232.4	A	23.5	A	9.7	A	42.3	A	gb:NM_033225.1 /DB_XREF=gi:15100167 /GEN=CSMD1 /TID=Hs2.123468.1 /CNT=2 /FEA=FLmRNA /TIER=FL /STK=1 /LL=64478 /UG=Hs.123468 /DEF=Homo sapiens CUB and Sushi multiple domains 1 (CSMD1), mRNA. /PROD=CUB and Sushi multiple domains 1 /FL=gb:NM_033225.1
1553407_at	47.9	A	99	A	13.2	A	50.3	A	56.1	A	63.2	A	51.6	A	39.5	A	25.9	A	73	A	29.2	A	72	P	gb:NM_033044.1 /DB_XREF=gi:15011907 /GEN=MACF1 /TID=Hs2.108258.2 /CNT=2 /FEA=FLmRNA /TIER=FL /STK=1 /LL=23499 /UG=Hs.108258 /DEF=Homo sapiens microtubule-actin crosslinking factor 1 (MACF1), transcript variant 3, mRNA. /PROD=microfilament and actin filament cross-linkerprotein, isoform c /FL=gb:NM_033044.1
1553409_at	47	A	15.6	A	10.9	A	41.9	A	3.4	A	57.2	A	35.2	A	71.6	A	79.8	A	13.9	A	29.9	A	11.8	A	gb:NM_025003.2 /DB_XREF=gi:28460689 /GEN=ADAMTS20 /TID=Hs2.287554.1 /CNT=2 /FEA=FLmRNA /TIER=FL /STK=1 /LL=80070 /UG=Hs.287554 /DEF=Homo sapiens a disintegrin-like and metalloprotease with thrombospondin type 1 motifs 20 (ADAMTS20), transcript variant 1, mRNA. /PROD=a disintegrin-like and metalloprotease withthrombospondin type 1 motifs 20 isoform 1 /FL=gb:NM_025003.2
1553410_a_at	24.3	A	160.2	A	10.5	A	3.5	A	82.8	A	16.9	A	39.9	A	14.7	A	10.7	A	18.6	A	23.8	A	31.4	A	gb:AF395909.1 /DB_XREF=gi:18845016 /GEN=ABCC12 /TID=Hs2.343663.3 /CNT=2 /FEA=FLmRNA /TIER=FL /STK=1 /LL=94160 /UG=Hs.343663 /DEF=Homo sapiens ATP-binding cassette protein C12 isoform B (ABCC12) mRNA, complete cds, alternatively spliced. /PROD=ATP-binding cassette protein C12 isoform B /FL=gb:AF395909.1 gb:NM_145188.1
1553411_s_at	172.3	P	170.7	P	61.4	A	33.3	A	50.2	A	37.5	A	172.8	P	21.4	A	47.5	A	81.7	A	27.9	A	25.3	A	gb:NM_171999.1 /DB_XREF=gi:25188194 /GEN=SALL3 /TID=Hs2.432482.1 /CNT=2 /FEA=FLmRNA /TIER=FL /STK=1 /LL=27164 /UG=Hs.432482 /DEF=Homo sapiens sal-like 3 (Drosophila) (SALL3), mRNA. /PROD=sal-like 3 /FL=gb:NM_171999.1
1553412_at	128.2	A	73.9	A	54.8	A	15.1	A	64.8	A	61.3	A	96.2	A	51.9	A	22.6	A	58.1	A	8.8	A	19.9	A	gb:NM_032785.1 /DB_XREF=gi:14249449 /TID=Hs2.334510.1 /CNT=2 /FEA=FLmRNA /TIER=FL /STK=1 /LL=84871 /UG_GENE=FLJ14442 /UG=Hs.334510 /UG_TITLE=hypothetical protein FLJ14442 /DEF=Homo sapiens hypothetical protein FLJ14442 (FLJ14442), mRNA. /FL=gb:NM_032785.1
1553413_at	12.1	A	20.3	A	44.9	A	20.6	A	22.6	A	8.4	A	54.5	A	14.9	A	26.5	A	68	A	24.8	A	17.4	A	gb:NM_025011.1 /DB_XREF=gi:13376530 /TID=Hs2.287593.1 /CNT=2 /FEA=FLmRNA /TIER=FL /STK=1 /LL=80078 /UG_GENE=FLJ13744 /UG=Hs.287593 /UG_TITLE=hypothetical protein FLJ13744 /DEF=Homo sapiens hypothetical protein FLJ13744 (FLJ13744), mRNA. /FL=gb:NM_025011.1
1553415_at	3.9	A	5.2	A	9.4	A	1.4	A	3.9	A	32.1	A	38.8	A	32.2	A	23.7	A	7.6	A	6.2	A	7.9	A	gb:NM_139319.1 /DB_XREF=gi:21322233 /GEN=VGLUT3 /TID=Hs2.116871.1 /CNT=2 /FEA=FLmRNA /TIER=FL /STK=1 /LL=246213 /UG=Hs.116871 /DEF=Homo sapiens vesicular glutamate transporter 3 (VGLUT3), mRNA. /PROD=vesicular glutamate transporter 3 /FL=gb:NM_139319.1
1553417_at	144.9	P	131.5	P	36.7	A	96.9	P	100.2	M	118.6	P	203.4	P	49.7	A	30.5	P	133.2	P	122.3	P	122.4	P	gb:NM_173580.1 /DB_XREF=gi:27734816 /TID=Hs2.376151.1 /CNT=2 /FEA=FLmRNA /TIER=FL /STK=1 /LL=283171 /UG_GENE=FLJ39058 /UG=Hs.376151 /UG_TITLE=hypothetical protein FLJ39058 /DEF=Homo sapiens hypothetical protein FLJ39058 (FLJ39058), mRNA. /FL=gb:NM_173580.1
1553418_a_at	108.1	A	17.1	A	58.4	A	11.7	A	121.5	A	79.2	A	140.6	A	21.8	A	66.1	A	93.9	P	85	A	14.1	A	gb:NM_138996.1 /DB_XREF=gi:20544141 /GEN=caspr5 /TID=Hs2.350768.2 /CNT=2 /FEA=FLmRNA /TIER=FL /STK=1 /LL=129684 /UG=Hs.350768 /DEF=Homo sapiens caspr5 protein (caspr5), transcript variant 2, mRNA. /PROD=caspr5 protein isoform 2 /FL=gb:NM_138996.1
1553420_at	13	A	35.4	A	36.8	A	5.6	A	15.9	A	97.8	A	145.3	A	18.7	A	41	A	20.8	A	17.7	A	51.6	A	gb:NM_153031.1 /DB_XREF=gi:23308528 /TID=Hs2.151184.1 /CNT=2 /FEA=FLmRNA /TIER=FL /STK=1 /LL=150538 /UG_GENE=FLJ32063 /UG=Hs.151184 /UG_TITLE=hypothetical protein FLJ32063 /DEF=Homo sapiens hypothetical protein FLJ32063 (FLJ32063), mRNA. /FL=gb:NM_153031.1
1553422_s_at	129.9	A	38.8	A	31.7	A	21.2	A	137.1	A	14.2	A	260.3	A	42.3	A	9.6	A	68.8	A	27.9	A	57.2	A	gb:NM_145892.1 /DB_XREF=gi:22538406 /GEN=A2BP1 /TID=Hs2.57937.4 /CNT=2 /FEA=FLmRNA /TIER=FL /STK=1 /LL=54715 /UG=Hs.57937 /DEF=Homo sapiens ataxin 2-binding protein 1 (A2BP1), transcript variant 2, mRNA. /PROD=ataxin 2-binding protein 1 isoform 2 /FL=gb:NM_145892.1 gb:AF094849.1
1553423_a_at	34.4	M	1.4	A	0.7	A	26.1	A	28.7	A	1.9	A	20.4	A	2	A	5.3	A	3.6	A	1.9	A	3.3	A	gb:NM_144682.1 /DB_XREF=gi:21389580 /TID=Hs2.193490.1 /CNT=2 /FEA=FLmRNA /TIER=FL /STK=1 /LL=146857 /UG_GENE=FLJ31952 /UG=Hs.193490 /UG_TITLE=hypothetical protein FLJ31952 /DEF=Homo sapiens hypothetical protein FLJ31952 (FLJ31952), mRNA. /FL=gb:NM_144682.1
1553424_at	9.7	A	10.5	A	10.5	A	13.8	A	21.8	A	27.6	A	117.2	A	60.4	A	13.6	A	12.7	A	20.5	A	55.4	A	gb:NM_173599.1 /DB_XREF=gi:27734764 /TID=Hs2.371869.1 /CNT=2 /FEA=FLmRNA /TIER=FL /STK=1 /LL=283461 /UG_GENE=FLJ40126 /UG=Hs.371869 /UG_TITLE=hypothetical protein FLJ40126 /DEF=Homo sapiens hypothetical protein FLJ40126 (FLJ40126), mRNA. /FL=gb:NM_173599.1
1553425_at	16.5	A	8.3	A	52.1	A	3.8	A	13.9	A	66.3	A	147.4	A	65.5	A	15.2	A	8.6	A	16.8	A	78.8	A	gb:NM_152498.1 /DB_XREF=gi:22749036 /TID=Hs2.367888.1 /CNT=2 /FEA=FLmRNA /TIER=FL /STK=1 /LL=149465 /UG_GENE=FLJ32000 /UG=Hs.367888 /UG_TITLE=hypothetical protein FLJ32000 /DEF=Homo sapiens hypothetical protein FLJ32000 (FLJ32000), mRNA. /FL=gb:NM_152498.1
1553426_at	101.4	A	159.1	A	34.6	A	64	A	56.6	A	74.9	A	155.3	A	47.6	A	55	A	140.7	A	79.3	A	112.6	A	gb:NM_173667.1 /DB_XREF=gi:27734794 /TID=Hs2.376312.1 /CNT=2 /FEA=FLmRNA /TIER=FL /STK=1 /LL=285668 /UG_GENE=FLJ37543 /UG=Hs.376312 /UG_TITLE=hypothetical protein FLJ37543 /DEF=Homo sapiens hypothetical protein FLJ37543 (FLJ37543), mRNA. /FL=gb:NM_173667.1
1553427_at	18.1	A	7.1	A	15.4	A	6.4	A	30.2	A	54.1	A	62.7	A	10.8	A	50.4	A	21.2	A	8.1	A	83.2	A	gb:NM_139055.1 /DB_XREF=gi:21265057 /GEN=ADAMTS15 /TID=Hs2.352629.1 /CNT=2 /FEA=FLmRNA /TIER=FL /STK=1 /LL=170689 /UG=Hs.352629 /DEF=Homo sapiens a disintegrin-like and metalloprotease (reprolysin type) with thrombospondin type 1 motif, 15 (ADAMTS15), mRNA. /PROD=a disintegrin-like and metalloprotease(reprolysin type) with thrombospondin type 1 motif, 15preproprotein /FL=gb:NM_139055.1
1553428_at	113.5	M	55.3	A	54.9	A	7.1	A	5.9	A	68.6	M	180.8	A	68.2	P	37.3	A	52.3	A	74.3	A	82.4	A	gb:NM_173675.1 /DB_XREF=gi:27735140 /TID=Hs2.381950.1 /CNT=2 /FEA=FLmRNA /TIER=FL /STK=1 /LL=285780 /UG_GENE=FLJ33708 /UG=Hs.381950 /UG_TITLE=hypothetical protein FLJ33708 /DEF=Homo sapiens hypothetical protein FLJ33708 (FLJ33708), mRNA. /FL=gb:NM_173675.1
1553429_at	152.4	A	124.3	A	109.1	A	90.9	A	52.8	A	103	A	127	A	66.6	A	42.9	A	66.1	A	121.1	A	107.9	A	gb:NM_152575.1 /DB_XREF=gi:22749184 /TID=Hs2.350785.1 /CNT=2 /FEA=FLmRNA /TIER=FL /STK=1 /LL=158263 /UG_GENE=FLJ31713 /UG=Hs.350785 /UG_TITLE=hypothetical protein FLJ31713 /DEF=Homo sapiens hypothetical protein FLJ31713 (FLJ31713), mRNA. /FL=gb:NM_152575.1
1553430_a_at	37.7	A	86.5	A	75.3	A	36.7	A	421.3	P	89.2	A	176.1	A	18.8	A	31.8	A	162.3	A	28.9	A	166.3	A	gb:AY028913.1 /DB_XREF=gi:19067935 /GEN=EDARADD /TID=Hs2.352224.2 /CNT=2 /FEA=FLmRNA /TIER=FL /STK=1 /LL=128178 /UG=Hs.352224 /DEF=Homo sapiens ectodysplasia A receptor associated death domain A (EDARADD) mRNA, complete cds; alternatively spliced. /PROD=ectodysplasia A receptor associated death domainA /FL=gb:NM_145861.1 gb:AY028913.1
1553432_s_at	16.2	A	31.6	A	10	A	13.5	A	14.4	A	16.9	A	43.2	A	7.5	A	7.5	A	8	A	18.6	A	117.6	A	gb:NM_170664.1 /DB_XREF=gi:24638451 /GEN=OTOA /TID=Hs2.345232.1 /CNT=2 /FEA=FLmRNA /TIER=FL /STK=1 /LL=146183 /UG=Hs.345232 /DEF=Homo sapiens otoancorin (OTOA), mRNA. /PROD=otoancorin /FL=gb:NM_170664.1
1553433_at	5	A	13.5	A	5	A	19.3	A	2.4	A	56.1	A	18.4	A	3.3	A	3.5	A	3.3	A	24.6	A	3.9	A	gb:NM_173550.1 /DB_XREF=gi:27734898 /TID=Hs2.151560.1 /CNT=2 /FEA=FLmRNA /TIER=FL /STK=1 /LL=203238 /UG_GENE=FLJ39267 /UG=Hs.151560 /UG_TITLE=hypothetical protein FLJ39267 /DEF=Homo sapiens hypothetical protein FLJ39267 (FLJ39267), mRNA. /FL=gb:NM_173550.1
1553434_at	47.6	A	70.3	A	21.9	A	11.6	A	5.2	A	13.8	A	73.3	A	3.6	A	55	A	7.9	A	42.3	A	19.2	A	gb:NM_173534.1 /DB_XREF=gi:27734930 /TID=Hs2.406984.1 /CNT=2 /FEA=FLmRNA /TIER=FL /STK=1 /LL=163720 /UG_GENE=FLJ40054 /UG=Hs.406984 /UG_TITLE=hypothetical protein FLJ40054 /DEF=Homo sapiens hypothetical protein FLJ40054 (FLJ40054), mRNA. /FL=gb:NM_173534.1
1553435_at	11.9	A	58.3	A	14.9	A	10.4	A	40.8	A	32.9	A	88.5	A	17.9	A	13.8	A	73	A	46.9	A	24.5	A	gb:NM_152469.1 /DB_XREF=gi:22748980 /TID=Hs2.350822.1 /CNT=2 /FEA=FLmRNA /TIER=FL /STK=1 /LL=147276 /UG_GENE=FLJ31338 /UG=Hs.350822 /UG_TITLE=hypothetical protein FLJ31338 /DEF=Homo sapiens hypothetical protein FLJ31338 (FLJ31338), mRNA. /FL=gb:NM_152469.1
1553436_at	99	A	184.7	A	21.7	A	43.3	A	20.4	A	18.5	A	111.2	A	105.1	A	88.2	A	98.9	A	98.1	A	72.1	A	gb:NM_173600.1 /DB_XREF=gi:27734766 /TID=Hs2.244017.1 /CNT=2 /FEA=FLmRNA /TIER=FL /STK=1 /LL=283463 /UG_GENE=FLJ35746 /UG=Hs.244017 /UG_TITLE=hypothetical protein FLJ35746 /DEF=Homo sapiens hypothetical protein FLJ35746 (FLJ35746), mRNA. /FL=gb:NM_173600.1
1553437_at	36.9	A	157.4	A	23.6	A	65.9	A	179.1	A	157.4	A	132.7	A	58	A	207.1	A	160.6	A	84.6	A	167.3	A	gb:NM_152375.1 /DB_XREF=gi:22748806 /TID=Hs2.376187.1 /CNT=2 /FEA=FLmRNA /TIER=FL /STK=1 /LL=127707 /UG_GENE=FLJ38753 /UG=Hs.376187 /UG_TITLE=hypothetical protein FLJ38753 /DEF=Homo sapiens hypothetical protein FLJ38753 (FLJ38753), mRNA. /FL=gb:NM_152375.1
1553438_at	406.2	A	408.1	P	360.5	P	215.7	A	253.4	A	318.7	A	698.1	A	329.2	P	367.1	M	447.3	P	420.9	P	346	P	gb:NM_173578.1 /DB_XREF=gi:27734820 /TID=Hs2.382074.1 /CNT=2 /FEA=FLmRNA /TIER=FL /STK=1 /LL=283135 /UG_GENE=FLJ90834 /UG=Hs.382074 /UG_TITLE=hypothetical protein FLJ90834 /DEF=Homo sapiens hypothetical protein FLJ90834 (FLJ90834), mRNA. /FL=gb:NM_173578.1
1553439_at	91.5	A	133.1	A	54.8	A	42.6	A	70.7	A	20.4	A	213.1	A	41.1	A	27.5	A	58.5	A	75.8	A	92.3	A	gb:NM_173692.1 /DB_XREF=gi:27734972 /TID=Hs2.375844.1 /CNT=2 /FEA=FLmRNA /TIER=FL /STK=1 /LL=286309 /UG_GENE=FLJ25862 /UG=Hs.375844 /UG_TITLE=hypothetical protein FLJ25862 /DEF=Homo sapiens hypothetical protein FLJ25862 (FLJ25862), mRNA. /FL=gb:NM_173692.1
1553440_at	6.8	A	37.2	A	20.1	A	1.4	A	1	A	25.9	A	10.6	A	20.2	A	6.3	A	27.3	M	39.1	A	60.7	M	gb:NM_153010.1 /DB_XREF=gi:23308580 /TID=Hs2.356773.1 /CNT=2 /FEA=FLmRNA /TIER=FL /STK=1 /LL=147429 /UG_GENE=FLJ30507 /UG=Hs.356773 /UG_TITLE=hypothetical protein FLJ30507 /DEF=Homo sapiens hypothetical protein FLJ30507 (FLJ30507), mRNA. /FL=gb:NM_153010.1
1553441_at	0.6	A	0.5	A	1.1	A	9.3	A	1.1	A	0.6	A	12.5	A	1.6	A	0.9	A	0.3	A	0.3	A	0.4	A	gb:NM_138994.1 /DB_XREF=gi:20544136 /GEN=CASPR4 /TID=Hs2.156829.2 /CNT=2 /FEA=FLmRNA /TIER=FL /STK=1 /LL=85445 /UG=Hs.156829 /DEF=Homo sapiens cell recognition protein CASPR4 (CASPR4), transcript variant 2, mRNA. /PROD=cell recognition protein CASPR4, isoform 2 /FL=gb:NM_138994.1
1553442_a_at	4	A	16.5	A	2.6	A	11.4	A	19.6	A	21.5	A	49.6	A	21.4	A	14.3	A	33.8	A	15.3	A	21.8	A	gb:NM_138994.1 /DB_XREF=gi:20544136 /GEN=CASPR4 /TID=Hs2.156829.2 /CNT=2 /FEA=FLmRNA /TIER=FL /STK=1 /LL=85445 /UG=Hs.156829 /DEF=Homo sapiens cell recognition protein CASPR4 (CASPR4), transcript variant 2, mRNA. /PROD=cell recognition protein CASPR4, isoform 2 /FL=gb:NM_138994.1
1553443_at	120.3	A	115.8	A	87.2	A	47.8	A	114.2	A	118.1	A	314	P	35.9	A	48.6	A	53	A	121.4	A	95.7	A	gb:NM_173684.1 /DB_XREF=gi:27735146 /TID=Hs2.376528.1 /CNT=2 /FEA=FLmRNA /TIER=FL /STK=1 /LL=286051 /UG_GENE=FLJ35721 /UG=Hs.376528 /UG_TITLE=hypothetical protein FLJ35721 /DEF=Homo sapiens hypothetical protein FLJ35721 (FLJ35721), mRNA. /FL=gb:NM_173684.1
1553444_a_at	313.5	A	234.1	A	104.7	A	46.9	A	94.3	A	24.3	A	47.6	A	215.8	A	48.6	A	20.6	A	112.1	A	67.4	A	gb:NM_173507.1 /DB_XREF=gi:27735128 /TID=Hs2.330166.1 /CNT=2 /FEA=FLmRNA /TIER=FL /STK=1 /LL=148345 /UG_GENE=FLJ37118 /UG=Hs.330166 /UG_TITLE=hypothetical protein FLJ37118 /DEF=Homo sapiens hypothetical protein FLJ37118 (FLJ37118), mRNA. /FL=gb:NM_173507.1
1553446_at	59.7	A	75.8	A	19.3	A	32.9	A	27.1	A	7.8	A	72.9	A	6.3	A	22.7	A	53.9	A	12.3	A	14.7	A	gb:NM_173671.1 /DB_XREF=gi:27734722 /TID=Hs2.407020.1 /CNT=2 /FEA=FLmRNA /TIER=FL /STK=1 /LL=285754 /UG_GENE=FLJ37396 /UG=Hs.407020 /UG_TITLE=hypothetical protein FLJ37396 /DEF=Homo sapiens hypothetical protein FLJ37396 (FLJ37396), mRNA. /FL=gb:NM_173671.1
1553447_at	17	A	73.3	A	42.7	A	18.6	A	21.8	A	103.8	A	72.6	A	74.1	A	52.5	A	92.4	A	86.4	A	112	A	gb:NM_152336.1 /DB_XREF=gi:22748732 /TID=Hs2.350741.1 /CNT=2 /FEA=FLmRNA /TIER=FL /STK=1 /LL=123624 /UG_GENE=FLJ32310 /UG=Hs.350741 /UG_TITLE=hypothetical protein FLJ32310 /DEF=Homo sapiens hypothetical protein FLJ32310 (FLJ32310), mRNA. /FL=gb:NM_152336.1
1553448_at	2.6	A	5.9	A	2.2	A	3.1	A	6.3	A	9.7	A	21.1	A	9.9	A	11.9	A	2.7	A	3	A	6.2	A	gb:NM_173673.1 /DB_XREF=gi:27735001 /TID=Hs2.376634.1 /CNT=2 /FEA=FLmRNA /TIER=FL /STK=1 /LL=285759 /UG_GENE=FLJ34503 /UG=Hs.376634 /UG_TITLE=hypothetical protein FLJ34503 /DEF=Homo sapiens hypothetical protein FLJ34503 (FLJ34503), mRNA. /FL=gb:NM_173673.1
1553449_at	48.2	A	24.8	A	12.5	A	26.5	A	6.2	A	8.1	A	33	A	3.4	A	22.7	A	8	A	37	A	5.9	A	gb:NM_173617.1 /DB_XREF=gi:27734731 /TID=Hs2.376413.1 /CNT=2 /FEA=FLmRNA /TIER=FL /STK=1 /LL=283860 /UG_GENE=FLJ36701 /UG=Hs.376413 /UG_TITLE=hypothetical protein FLJ36701 /DEF=Homo sapiens hypothetical protein FLJ36701 (FLJ36701), mRNA. /FL=gb:NM_173617.1
1553450_s_at	32.3	A	123.4	A	65.1	A	58.8	A	16.7	A	7.5	A	68.6	A	16.6	A	20.4	A	88.6	A	51	A	56	A	gb:NM_173617.1 /DB_XREF=gi:27734731 /TID=Hs2.376413.1 /CNT=2 /FEA=FLmRNA /TIER=FL /STK=1 /LL=283860 /UG_GENE=FLJ36701 /UG=Hs.376413 /UG_TITLE=hypothetical protein FLJ36701 /DEF=Homo sapiens hypothetical protein FLJ36701 (FLJ36701), mRNA. /FL=gb:NM_173617.1
1553451_at	15.6	A	18.8	A	14.5	A	11.6	A	4.8	A	6.7	A	32.3	A	6	A	5.8	A	4.7	A	5.9	A	4.9	A	gb:NM_173616.1 /DB_XREF=gi:27734712 /TID=Hs2.376505.1 /CNT=2 /FEA=FLmRNA /TIER=FL /STK=1 /LL=283847 /UG_GENE=FLJ35894 /UG=Hs.376505 /UG_TITLE=hypothetical protein FLJ35894 /DEF=Homo sapiens hypothetical protein FLJ35894 (FLJ35894), mRNA. /FL=gb:NM_173616.1
1553452_at	139.7	M	135.4	A	72.6	A	64.7	A	103.1	A	70.2	A	326.5	A	54.4	A	63.1	A	122.5	A	152.4	A	62.4	A	gb:NM_173597.1 /DB_XREF=gi:27734768 /TID=Hs2.381908.1 /CNT=2 /FEA=FLmRNA /TIER=FL /STK=1 /LL=283446 /UG_GENE=FLJ37587 /UG=Hs.381908 /UG_TITLE=hypothetical protein FLJ37587 /DEF=Homo sapiens hypothetical protein FLJ37587 (FLJ37587), mRNA. /FL=gb:NM_173597.1
1553453_at	217.1	A	160.4	A	138.8	A	78.7	A	63.5	A	130	A	118.9	A	113.7	A	135.1	A	24.7	A	232.7	A	136.5	A	gb:NM_130387.4 /DB_XREF=gi:28559001 /GEN=ASB14 /TID=Hs2.381357.1 /CNT=2 /FEA=FLmRNA /TIER=FL /STK=1 /LL=142686 /UG=Hs.381357 /DEF=Homo sapiens ankyrin repeat and SOCS box-containing 14 (ASB14), mRNA. /PROD=ankyrin repeat and SOCS box-containing protein14 /FL=gb:NM_130387.4 gb:AF403032.1
1553454_at	12.5	A	65.9	A	30.2	A	4	A	12.1	A	13.6	A	52	A	8.3	A	46.8	P	89.7	A	15	A	39.5	A	gb:NM_152364.1 /DB_XREF=gi:22748784 /TID=Hs2.376144.1 /CNT=2 /FEA=FLmRNA /TIER=FL /STK=1 /LL=126638 /UG_GENE=FLJ39117 /UG=Hs.376144 /UG_TITLE=hypothetical protein FLJ39117 /DEF=Homo sapiens hypothetical protein FLJ39117 (FLJ39117), mRNA. /FL=gb:NM_152364.1
1553456_at	101.4	A	111.2	A	15.6	A	17	A	124	A	84.1	A	303.9	A	76.4	A	84.6	A	195.9	A	67.4	A	176	A	gb:NM_152714.1 /DB_XREF=gi:22749422 /TID=Hs2.351430.1 /CNT=2 /FEA=FLmRNA /TIER=FL /STK=1 /LL=219848 /UG_GENE=FLJ30719 /UG=Hs.351430 /UG_TITLE=hypothetical protein FLJ30719 /DEF=Homo sapiens hypothetical protein FLJ30719 (FLJ30719), mRNA. /FL=gb:NM_152714.1
1553457_at	16.7	A	12	A	16.5	A	10.8	A	18.3	A	18.2	A	33.6	A	12.5	A	14.8	A	14.4	A	9.6	A	29.2	A	gb:NM_173697.1 /DB_XREF=gi:27734824 /TID=Hs2.376729.1 /CNT=2 /FEA=FLmRNA /TIER=FL /STK=1 /LL=286485 /UG_GENE=FLJ33610 /UG=Hs.376729 /UG_TITLE=hypothetical protein FLJ33610 /DEF=Homo sapiens hypothetical protein FLJ33610 (FLJ33610), mRNA. /FL=gb:NM_173697.1
1553458_at	81.3	A	46	A	58.1	A	70	A	29.9	A	63.3	A	140.7	A	58.4	A	52	A	30.8	A	183.2	A	44.6	A	gb:NM_144984.1 /DB_XREF=gi:21450676 /TID=Hs2.350092.1 /CNT=2 /FEA=FLmRNA /TIER=FL /STK=1 /LL=196740 /UG_GENE=FLJ31737 /UG=Hs.350092 /UG_TITLE=hypothetical protein FLJ31737 /DEF=Homo sapiens hypothetical protein FLJ31737 (FLJ31737), mRNA. /FL=gb:NM_144984.1
1553459_at	24.3	A	21.2	A	6.8	A	7.8	A	18.5	A	9.8	A	54.8	A	64.9	A	31.6	A	20.2	A	20.5	A	24.5	A	gb:NM_173646.1 /DB_XREF=gi:27735096 /TID=Hs2.376099.1 /CNT=2 /FEA=FLmRNA /TIER=FL /STK=1 /LL=284992 /UG_GENE=FLJ39660 /UG=Hs.376099 /UG_TITLE=hypothetical protein FLJ39660 /DEF=Homo sapiens hypothetical protein FLJ39660 (FLJ39660), mRNA. /FL=gb:NM_173646.1
1553460_at	33.4	A	26.7	A	4.7	A	7.1	A	69.4	A	54.7	A	88	A	24	A	61	A	16.1	A	13.8	A	16.1	A	gb:NM_173649.1 /DB_XREF=gi:27735114 /TID=Hs2.376022.1 /CNT=2 /FEA=FLmRNA /TIER=FL /STK=1 /LL=285051 /UG_GENE=FLJ40172 /UG=Hs.376022 /UG_TITLE=hypothetical protein FLJ40172 /DEF=Homo sapiens hypothetical protein FLJ40172 (FLJ40172), mRNA. /FL=gb:NM_173649.1
1553461_at	16.1	A	10.8	A	11.3	A	40.7	A	34.6	A	6.9	A	16.3	A	53.9	A	25.5	A	9.1	A	39.5	A	66.1	A	gb:NM_173696.1 /DB_XREF=gi:27734802 /TID=Hs2.371894.1 /CNT=2 /FEA=FLmRNA /TIER=FL /STK=1 /LL=286476 /UG_GENE=FLJ40182 /UG=Hs.371894 /UG_TITLE=hypothetical protein FLJ40182 /DEF=Homo sapiens hypothetical protein FLJ40182 (FLJ40182), mRNA. /FL=gb:NM_173696.1
1553462_at	45.5	A	22.8	A	29.2	A	9	A	5	A	68.4	A	12.4	A	16.7	A	37.9	A	21.7	A	7.1	A	48.8	A	gb:NM_152541.1 /DB_XREF=gi:22749120 /TID=Hs2.350936.1 /CNT=2 /FEA=FLmRNA /TIER=FL /STK=1 /LL=152897 /UG_GENE=FLJ30194 /UG=Hs.350936 /UG_TITLE=hypothetical protein FLJ30194 /DEF=Homo sapiens hypothetical protein FLJ30194 (FLJ30194), mRNA. /FL=gb:NM_152541.1
1553464_at	298.7	A	233.9	A	310.6	A	346.6	A	296.6	A	271.1	A	65.9	A	176	A	336.9	A	409.3	A	303.5	A	243	A	gb:NM_173682.1 /DB_XREF=gi:27734980 /TID=Hs2.406980.1 /CNT=2 /FEA=FLmRNA /TIER=FL /STK=1 /LL=286023 /UG_GENE=FLJ40288 /UG=Hs.406980 /UG_TITLE=hypothetical protein FLJ40288 /DEF=Homo sapiens hypothetical protein FLJ40288 (FLJ40288), mRNA. /FL=gb:NM_173682.1
1553465_a_at	7.3	A	7.8	A	6.8	A	3.9	A	22.8	A	18.1	A	51.5	A	15.8	A	3.8	A	5.7	A	5.9	A	15.4	A	gb:NM_145024.1 /DB_XREF=gi:21450748 /TID=Hs2.350800.1 /CNT=2 /FEA=FLmRNA /TIER=FL /STK=1 /LL=221223 /UG_GENE=FLJ31547 /UG=Hs.350800 /UG_TITLE=hypothetical protein FLJ31547 /DEF=Homo sapiens hypothetical protein FLJ31547 (FLJ31547), mRNA. /FL=gb:NM_145024.1
1553466_at	161.4	A	222.2	A	64.8	A	71.3	A	77.6	A	216.2	M	179.1	A	97.8	A	245	P	119.4	A	135.4	A	210.2	P	gb:NM_173695.1 /DB_XREF=gi:27734890 /TID=Hs2.376425.1 /CNT=2 /FEA=FLmRNA /TIER=FL /STK=1 /LL=286464 /UG_GENE=FLJ36601 /UG=Hs.376425 /UG_TITLE=hypothetical protein FLJ36601 /DEF=Homo sapiens hypothetical protein FLJ36601 (FLJ36601), mRNA. /FL=gb:NM_173695.1
1553467_at	22.2	A	82.1	A	96.8	A	79.6	A	79.6	A	92.4	A	151.1	A	41.1	A	124.1	A	54.1	A	104.2	A	102.4	A	gb:NM_152580.1 /DB_XREF=gi:22749200 /TID=Hs2.350697.1 /CNT=2 /FEA=FLmRNA /TIER=FL /STK=1 /LL=158722 /UG_GENE=FLJ32742 /UG=Hs.350697 /UG_TITLE=hypothetical protein FLJ32742 /DEF=Homo sapiens hypothetical protein FLJ32742 (FLJ32742), mRNA. /FL=gb:NM_152580.1
1553468_at	49.7	A	15.3	A	10.5	A	6	A	3.8	A	69	A	78.2	A	52.3	A	8.8	A	14.2	A	36.1	A	29.4	A	gb:NM_032821.1 /DB_XREF=gi:14249517 /TID=Hs2.334517.1 /CNT=2 /FEA=FLmRNA /TIER=FL /STK=1 /LL=84907 /UG_GENE=FLJ14665 /UG=Hs.334517 /UG_TITLE=hypothetical protein FLJ14665 /DEF=Homo sapiens hypothetical protein FLJ14665 (FLJ14665), mRNA. /FL=gb:NM_032821.1
1553470_at	65.6	A	159.6	A	53.1	A	9.9	A	133.4	A	114.9	P	159.8	A	33.8	A	170.7	M	77.2	A	132	M	91.1	A	gb:NM_173628.1 /DB_XREF=gi:27734756 /TID=Hs2.375975.1 /CNT=2 /FEA=FLmRNA /TIER=FL /STK=1 /LL=284176 /UG_GENE=FLJ40457 /UG=Hs.375975 /UG_TITLE=hypothetical protein FLJ40457 /DEF=Homo sapiens hypothetical protein FLJ40457 (FLJ40457), mRNA. /FL=gb:NM_173628.1
1553471_at	11.8	A	44.1	A	45.4	A	27.4	A	5.8	A	45	A	155	A	30.6	A	105.8	A	41.6	A	23	A	39.1	A	gb:NM_152462.1 /DB_XREF=gi:22748974 /TID=Hs2.380180.1 /CNT=2 /FEA=FLmRNA /TIER=FL /STK=1 /LL=146861 /UG_GENE=FLJ40154 /UG=Hs.380180 /UG_TITLE=hypothetical protein FLJ40154 /DEF=Homo sapiens hypothetical protein FLJ40154 (FLJ40154), mRNA. /FL=gb:NM_152462.1
1553472_at	93.3	A	83.5	A	62.8	A	11.1	A	12.2	A	86.8	A	142.2	A	51.9	A	76.6	A	102	A	129.8	A	50.6	A	gb:NM_153041.1 /DB_XREF=gi:23308538 /TID=Hs2.350660.1 /CNT=2 /FEA=FLmRNA /TIER=FL /STK=1 /LL=150596 /UG_GENE=FLJ32955 /UG=Hs.350660 /UG_TITLE=hypothetical protein FLJ32955 /DEF=Homo sapiens hypothetical protein FLJ32955 (FLJ32955), mRNA. /FL=gb:NM_153041.1
1553474_at	2.2	A	1.6	A	3.9	A	3	A	6.6	A	67	A	20.2	A	4.2	A	6.7	A	16.2	A	8.3	A	2.5	A	gb:AY172978.1 /DB_XREF=gi:27883912 /TID=Hs2Affx.1.10 /CNT=2 /FEA=FLmRNA /TIER=FL /STK=1 /NOTE=sequence(s) not in UniGene /DEF=Homo sapiens POTE mRNA, complete cds. /PROD=POTE /FL=gb:AY172978.1 gb:NM_174981.1
1553475_at	31.3	A	12.4	A	24.8	A	21.1	A	31.2	A	18.2	A	58.6	A	8.7	A	21.2	A	21.2	A	20.5	A	28.2	A	gb:NM_018582.2 /DB_XREF=gi:20591466 /TID=Hs2.279694.1 /CNT=2 /FEA=FLmRNA /TIER=FL /STK=1 /LL=55448 /UG_GENE=PRO1483 /UG=Hs.279694 /UG_TITLE=hypothetical protein PRO1483 /DEF=Homo sapiens hypothetical protein PRO1483 (PRO1483), mRNA. /FL=gb:NM_018582.2
1553478_at	43.5	A	38.2	A	53.9	A	18.9	A	14.8	A	87.9	A	148.5	A	18.3	A	13	A	50.3	A	47.1	A	73.8	A	gb:NM_173579.1 /DB_XREF=gi:27734812 /TID=Hs2.376015.1 /CNT=2 /FEA=FLmRNA /TIER=FL /STK=1 /LL=283165 /UG_GENE=FLJ40224 /UG=Hs.376015 /UG_TITLE=hypothetical protein FLJ40224 /DEF=Homo sapiens hypothetical protein FLJ40224 (FLJ40224), mRNA. /FL=gb:NM_173579.1
1553479_at	143.8	P	98.5	A	167.8	P	101.7	P	136.4	A	181.2	A	269.3	A	117.5	A	178.3	P	127.5	P	199.1	P	146	P	gb:NM_173633.1 /DB_XREF=gi:27734988 /TID=Hs2.382075.1 /CNT=2 /FEA=FLmRNA /TIER=FL /STK=1 /LL=284339 /UG_GENE=FLJ90805 /UG=Hs.382075 /UG_TITLE=hypothetical protein FLJ90805 /DEF=Homo sapiens hypothetical protein FLJ90805 (FLJ90805), mRNA. /FL=gb:NM_173633.1
1553482_at	74.7	A	6.2	A	5.5	A	4	A	8	A	9.1	A	20.7	A	2	A	3.1	A	6.8	A	9.8	A	7.7	A	gb:NM_153040.1 /DB_XREF=gi:23308512 /TID=Hs2.367879.1 /CNT=2 /FEA=FLmRNA /TIER=FL /STK=1 /LL=145858 /UG_GENE=FLJ32831 /UG=Hs.367879 /UG_TITLE=hypothetical protein FLJ32831 /DEF=Homo sapiens hypothetical protein FLJ32831 (FLJ32831), mRNA. /FL=gb:NM_153040.1
1553483_at	172.5	A	140.8	A	15.4	A	14.3	A	12.1	A	59.7	A	151.3	A	96.4	A	108.5	A	127.2	A	129	A	28.2	A	gb:NM_152762.1 /DB_XREF=gi:22749492 /TID=Hs2.350671.1 /CNT=2 /FEA=FLmRNA /TIER=FL /STK=1 /LL=254187 /UG_GENE=FLJ32880 /UG=Hs.350671 /UG_TITLE=hypothetical protein FLJ32880 /DEF=Homo sapiens hypothetical protein FLJ32880 (FLJ32880), mRNA. /FL=gb:NM_152762.1
1553484_at	11	A	93.4	A	42.2	A	50	P	46.9	A	49.9	A	89	A	30.1	A	30	A	49.8	A	60	A	64.4	A	gb:NM_144667.1 /DB_XREF=gi:21389550 /TID=Hs2.350668.1 /CNT=2 /FEA=FLmRNA /TIER=FL /STK=1 /LL=144360 /UG_GENE=FLJ32894 /UG=Hs.350668 /UG_TITLE=hypothetical protein FLJ32894 /DEF=Homo sapiens hypothetical protein FLJ32894 (FLJ32894), mRNA. /FL=gb:NM_144667.1
1553485_at	704.1	P	776.1	P	147.6	M	62.1	A	74.4	A	213.5	A	222	A	72.5	A	120.8	A	70.7	A	48	A	164.6	M	gb:NM_153038.1 /DB_XREF=gi:23308536 /TID=Hs2.350729.1 /CNT=2 /FEA=FLmRNA /TIER=FL /STK=1 /LL=151278 /UG_GENE=FLJ32447 /UG=Hs.350729 /UG_TITLE=hypothetical protein FLJ32447 /DEF=Homo sapiens hypothetical protein FLJ32447 (FLJ32447), mRNA. /FL=gb:NM_153038.1
1553486_a_at	18.3	A	18.1	A	3.7	A	21.9	A	15.9	A	5.3	A	75.6	A	40.8	A	18.9	A	95.5	A	52.4	A	89.8	A	gb:NM_173625.1 /DB_XREF=gi:27734753 /TID=Hs2.376101.1 /CNT=2 /FEA=FLmRNA /TIER=FL /STK=1 /LL=284099 /UG_GENE=FLJ39647 /UG=Hs.376101 /UG_TITLE=hypothetical protein FLJ39647 /DEF=Homo sapiens hypothetical protein FLJ39647 (FLJ39647), mRNA. /FL=gb:NM_173625.1
1553488_at	16.9	A	35.7	A	40.7	A	5.5	A	7.2	A	48.3	A	19.9	A	10.1	A	36.3	A	10.4	A	19.5	A	11.1	A	gb:NM_144674.1 /DB_XREF=gi:21389568 /TID=Hs2.143519.1 /CNT=2 /FEA=FLmRNA /TIER=FL /STK=1 /LL=146279 /UG_GENE=FLJ32871 /UG=Hs.143519 /UG_TITLE=hypothetical protein FLJ32871 /DEF=Homo sapiens hypothetical protein FLJ32871 (FLJ32871), mRNA. /FL=gb:NM_144674.1
1553489_a_at	12.5	A	12.6	A	13.1	A	4.7	A	13.7	A	16.1	A	60	A	4.6	A	13.2	A	10.8	A	8	A	11.8	A	gb:NM_144674.1 /DB_XREF=gi:21389568 /TID=Hs2.143519.1 /CNT=2 /FEA=FLmRNA /TIER=FL /STK=1 /LL=146279 /UG_GENE=FLJ32871 /UG=Hs.143519 /UG_TITLE=hypothetical protein FLJ32871 /DEF=Homo sapiens hypothetical protein FLJ32871 (FLJ32871), mRNA. /FL=gb:NM_144674.1
1553491_at	161.6	P	123.4	A	109.1	P	82.1	A	135.2	P	164.1	P	197.8	A	95.2	P	192	M	78.5	P	104.7	A	85.6	A	gb:NM_173598.1 /DB_XREF=gi:27734770 /TID=Hs2.375836.1 /CNT=2 /FEA=FLmRNA /TIER=FL /STK=1 /LL=283455 /UG_GENE=FLJ25965 /UG=Hs.375836 /UG_TITLE=hypothetical protein FLJ25965 /DEF=Homo sapiens hypothetical protein FLJ25965 (FLJ25965), mRNA. /FL=gb:NM_173598.1
1553492_a_at	7.8	A	22	A	8.3	A	4.6	A	10	A	51.5	A	115.8	A	25.9	A	17.9	A	46.7	A	46.1	A	31.9	A	gb:NM_006192.1 /DB_XREF=gi:9845286 /GEN=PAX1 /TID=Hs2.54567.1 /CNT=2 /FEA=FLmRNA /TIER=FL /STK=1 /LL=5075 /UG=Hs.54567 /DEF=Homo sapiens paired box gene 1 (PAX1), mRNA. /PROD=paired box gene 1 /FL=gb:NM_006192.1
1553493_a_at	208.9	A	263.7	P	189.1	A	114.7	A	86.9	A	132.9	A	244.3	A	212.7	M	206.6	A	117.9	A	148.9	A	90.7	A	gb:NM_152566.1 /DB_XREF=gi:22749174 /TID=Hs2.381360.1 /CNT=2 /FEA=FLmRNA /TIER=FL /STK=1 /LL=157739 /UG_GENE=FLJ25033 /UG=Hs.381360 /UG_TITLE=hypothetical protein FLJ25033 /DEF=Homo sapiens hypothetical protein FLJ25033 (FLJ25033), mRNA. /FL=gb:NM_152566.1
1553494_at	11.5	A	7.8	A	8	A	5.1	A	1.4	A	3	A	30.8	A	0.4	A	5.7	A	3.3	A	6.1	A	6.4	A	gb:NM_152566.1 /DB_XREF=gi:22749174 /TID=Hs2.381360.1 /CNT=2 /FEA=FLmRNA /TIER=FL /STK=1 /LL=157739 /UG_GENE=FLJ25033 /UG=Hs.381360 /UG_TITLE=hypothetical protein FLJ25033 /DEF=Homo sapiens hypothetical protein FLJ25033 (FLJ25033), mRNA. /FL=gb:NM_152566.1
1553497_at	10.9	A	9.5	A	14.6	A	5.6	A	9.4	A	7.6	A	39.9	A	15	A	34.9	A	8.6	A	7.8	A	6.7	A	gb:NM_152768.1 /DB_XREF=gi:22749506 /TID=Hs2.350600.1 /CNT=2 /FEA=FLmRNA /TIER=FL /STK=1 /LL=255055 /UG_GENE=FLJ25378 /UG=Hs.350600 /UG_TITLE=hypothetical protein FLJ25378 /DEF=Homo sapiens hypothetical protein FLJ25378 (FLJ25378), mRNA. /FL=gb:NM_152768.1
1553498_at	11.1	A	124.9	A	12.4	A	5.9	A	17.2	A	181.4	A	22.4	A	16	A	59.7	A	163	A	37.5	A	56.8	A	gb:NM_018572.1 /DB_XREF=gi:8924004 /TID=Hs2.326548.1 /CNT=2 /FEA=FLmRNA /TIER=FL /STK=1 /LL=55438 /UG_GENE=PRO1051 /UG=Hs.326548 /UG_TITLE=hypothetical protein PRO1051 /DEF=Homo sapiens hypothetical protein PRO1051 (PRO1051), mRNA. /FL=gb:NM_018572.1
1553499_s_at	231.6	A	197.2	A	177.4	A	58.5	A	70.9	A	218.3	A	189.2	A	323.4	A	94.1	A	378.4	A	194.3	A	187.7	A	gb:AY185496.1 /DB_XREF=gi:28207590 /TID=Hs2Affx.1.11 /CNT=2 /FEA=FLmRNA /TIER=FL /STK=1 /NOTE=sequence(s) not in UniGene /DEF=Homo sapiens SERPINA11 type a mRNA, complete cds. /PROD=SERPINA11 type a /FL=gb:NM_175739.1 gb:AY185496.1
1553500_at	9.4	A	12.5	A	46.3	A	4.8	A	76.3	A	11.9	A	50.8	A	17.9	A	41.8	A	45.8	A	17.6	A	22.4	A	gb:NM_012159.1 /DB_XREF=gi:16306585 /GEN=FBXL3B /TID=Hs2.348716.1 /CNT=2 /FEA=FLmRNA /TIER=FL /STK=1 /LL=26223 /UG=Hs.348716 /DEF=Homo sapiens F-box and leucine-rich repeat protein 3B (FBXL3B), mRNA. /PROD=F-box and leucine-rich repeat protein 3B /FL=gb:NM_012159.1
1553502_a_at	6.5	A	84.4	A	46.2	A	138.8	M	19.4	A	6.9	A	93.9	A	5.8	A	85.1	A	60	A	5.3	A	86.2	A	gb:NM_053016.1 /DB_XREF=gi:16604255 /GEN=PALM2 /TID=Hs2.348946.1 /CNT=2 /FEA=FLmRNA /TIER=FL /STK=1 /LL=114299 /UG=Hs.348946 /DEF=Homo sapiens paralemmin 2 (PALM2), mRNA. /PROD=paralemmin 2 /FL=gb:NM_053016.1
1553504_at	78.1	A	25.3	A	28.3	A	11.1	A	42	A	92.3	P	802.8	P	88.8	A	211.3	P	304.9	P	91.7	P	237.8	P	gb:NM_054032.1 /DB_XREF=gi:16876454 /GEN=MRGX4 /TID=Hs2.356858.1 /CNT=2 /FEA=FLmRNA /TIER=FL /STK=1 /LL=117196 /UG=Hs.356858 /DEF=Homo sapiens G protein-coupled receptor MRGX4 (MRGX4), mRNA. /PROD=G protein-coupled receptor MRGX4 /FL=gb:NM_054032.1
1553505_at	87	A	211.1	A	76	A	154.4	A	40.9	A	169.4	A	105.7	A	104.3	A	110.3	A	120.6	A	106.7	A	132	A	gb:NM_144670.1 /DB_XREF=gi:21389560 /TID=Hs2.334306.1 /CNT=2 /FEA=FLmRNA /TIER=FL /STK=1 /LL=144568 /UG_GENE=FLJ25179 /UG=Hs.334306 /UG_TITLE=hypothetical protein FLJ25179 /DEF=Homo sapiens hypothetical protein FLJ25179 (FLJ25179), mRNA. /FL=gb:NM_144670.1
1553506_at	80.4	A	81	M	60.8	A	4.8	A	83.3	M	37.7	A	212.5	P	106.8	P	4.9	A	49.2	A	29.3	A	53.2	A	gb:NM_173077.1 /DB_XREF=gi:27436870 /GEN=CPO /TID=Hs2.437191.1 /CNT=2 /FEA=FLmRNA /TIER=FL /STK=1 /LL=130749 /UG=Hs.437191 /DEF=Homo sapiens carboxypeptidase O (CPO), mRNA. /PROD=carboxypeptidase O /FL=gb:NM_173077.1
1553507_a_at	435.1	P	349.4	P	288.5	M	207.7	A	297.7	A	305.4	A	502.2	P	244.6	P	270.4	A	219	A	272.4	A	292.5	P	gb:NM_005284.1 /DB_XREF=gi:4885340 /GEN=GPR6 /TID=Hs2.46332.1 /CNT=2 /FEA=FLmRNA /TIER=FL /STK=1 /LL=2830 /UG=Hs.46332 /DEF=Homo sapiens G protein-coupled receptor 6 (GPR6), mRNA. /PROD=G protein-coupled receptor 6 /FL=gb:NM_005284.1
1553508_at	9.2	A	76.7	A	46.9	A	47.7	A	98.4	A	103.4	A	88.5	A	32.7	A	131.4	A	20.3	A	75.2	A	38.5	A	gb:NM_148895.1 /DB_XREF=gi:22507400 /TID=Hs2.380189.1 /CNT=2 /FEA=FLmRNA /TIER=FL /STK=1 /LL=259283 /UG_GENE=MDS2 /UG=Hs.380189 /UG_TITLE=MDS2 /DEF=Homo sapiens MDS2 (MDS2), mRNA. /FL=gb:NM_148895.1
1553510_s_at	1112	P	1477.8	P	795.6	P	843.1	P	875.6	P	723	P	854.5	A	1720	P	960.5	P	834.9	P	1490.7	P	1254.3	P	gb:NM_005444.1 /DB_XREF=gi:4885578 /GEN=RQCD1 /TID=Hs2.432483.1 /CNT=2 /FEA=FLmRNA /TIER=FL /STK=1 /LL=9125 /UG=Hs.432483 /DEF=Homo sapiens RCD1 required for cell differentiation1 homolog (S. pombe) (RQCD1), mRNA. /PROD=RCD1 required for cell differentiation1 homolog /FL=gb:NM_005444.1
1553511_at	227.4	A	342.2	A	170.1	A	160.8	A	218.7	A	161.7	A	114.9	A	259.1	A	34.4	A	229.5	A	155	A	205.2	A	gb:NM_152219.1 /DB_XREF=gi:22550105 /GEN=GJC1 /TID=Hs2.135211.1 /CNT=2 /FEA=FLmRNA /TIER=FL /STK=1 /LL=125111 /UG=Hs.135211 /DEF=Homo sapiens gap junction protein, chi 1, 31.9kDa (connexin 31.9) (GJC1), mRNA. /PROD=gap junction protein, chi 1, 31.9kDa (connexin31.9) /FL=gb:NM_152219.1
1553512_at	28.3	A	98.1	A	60.6	A	138.9	P	165.6	P	214	P	171.3	A	142.6	P	74.3	A	42.8	A	80.8	M	40.7	A	gb:NM_173860.1 /DB_XREF=gi:27804314 /GEN=HOXC12 /TID=Hs2.381267.1 /CNT=2 /FEA=FLmRNA /TIER=FL /STK=1 /LL=3228 /UG=Hs.381267 /DEF=Homo sapiens homeo box C12 (HOXC12), mRNA. /PROD=homeo box C12 /FL=gb:NM_173860.1
1553513_at	12.9	A	46.7	A	7.5	A	48	A	6.9	A	30.1	A	51.7	A	56.4	A	8.6	A	33.1	A	31.8	A	21.7	A	gb:NM_078625.1 /DB_XREF=gi:17865818 /GEN=VNN3 /TID=Hs2.183656.2 /CNT=2 /FEA=FLmRNA /TIER=FL /STK=1 /LL=55350 /UG=Hs.183656 /DEF=Homo sapiens vanin 3 (VNN3), transcript variant 2, mRNA. /PROD=vanin 3 isoform 2 precursor /FL=gb:NM_078625.1
1553514_a_at	18.1	A	20.4	A	30.2	A	18.7	A	54.3	A	47.5	A	123	A	21.2	A	160.2	P	7.5	A	75.7	A	110.1	A	gb:NM_078625.1 /DB_XREF=gi:17865818 /GEN=VNN3 /TID=Hs2.183656.2 /CNT=2 /FEA=FLmRNA /TIER=FL /STK=1 /LL=55350 /UG=Hs.183656 /DEF=Homo sapiens vanin 3 (VNN3), transcript variant 2, mRNA. /PROD=vanin 3 isoform 2 precursor /FL=gb:NM_078625.1
1553515_at	11	A	41.1	A	41.4	A	55.2	A	24.8	A	85.3	A	112.4	A	85.9	A	106.8	A	26.3	A	42.9	A	21.9	A	gb:NM_138336.1 /DB_XREF=gi:19923882 /TID=Hs2.432892.1 /CNT=2 /FEA=FLmRNA /TIER=FL /STK=1 /LL=150678 /UG_GENE=LOC150678 /UG=Hs.432892 /UG_TITLE=helicaseprimase complex protein /DEF=Homo sapiens helicaseprimase complex protein (LOC150678), mRNA. /FL=gb:NM_138336.1
1553517_at	44.6	A	38	A	19.6	A	10.6	A	21	A	16.9	A	82.1	A	22.5	A	35.9	A	32	A	32	A	32.9	A	gb:AF517122.1 /DB_XREF=gi:22655502 /GEN=NTWIST /TID=Hs2.381371.1 /CNT=2 /FEA=FLmRNA /TIER=FL /STK=1 /LL=222894 /UG=Hs.381371 /DEF=Homo sapiens N-TWIST basic helix-loop-helix protein (NTWIST) mRNA, complete cds. /PROD=N-TWIST basic helix-loop-helix protein /FL=gb:NM_152898.1 gb:AF517122.1
1553518_at	126.2	A	116.7	A	22.8	A	61.6	A	66.4	A	76.7	A	180.4	A	65.2	A	114.4	A	21.4	A	42.2	A	132.2	A	gb:AF355799.1 /DB_XREF=gi:18920385 /TID=Hs2.352637.1 /CNT=2 /FEA=FLmRNA /TIER=FL /STK=1 /LL=170949 /UG_GENE=DEFT1 /UG=Hs.352637 /DEF=Homo sapiens retrocyclin mRNA, complete cds. /PROD=retrocyclin /FL=gb:NM_139127.1 gb:AF355799.1
1553519_at	1.2	A	11.1	A	1.4	A	11.9	A	5.7	A	2.1	A	14.5	A	39	A	36.7	P	22.7	A	19.6	A	4.2	A	gb:NM_145180.2 /DB_XREF=gi:24475827 /TID=Hs2.433133.1 /CNT=2 /FEA=FLmRNA /TIER=FL /STK=1 /LL=246705;220869 /UG_GENE=C21orf94 /UG=Hs.433133 /UG_TITLE=chromosome 21 open reading frame 94 /DEF=Homo sapiens chromosome 21 open reading frame 94 (C21orf94), mRNA. /FL=gb:NM_145180.2
1553521_at	151.8	A	15.9	A	87.2	A	131.1	A	78.2	A	24.2	A	39.8	A	47.9	A	27	A	18	A	93.5	A	63.3	A	gb:NM_080389.1 /DB_XREF=gi:17939347 /GEN=DEFB104 /TID=Hs2.351810.1 /CNT=2 /FEA=FLmRNA /TIER=FL /STK=1 /LL=140596 /UG=Hs.351810 /DEF=Homo sapiens defensin, beta 104 (DEFB104), mRNA. /PROD=defensin, beta 104 /FL=gb:NM_080389.1
1553523_at	139.8	A	146.8	A	152	A	23.3	A	57.4	A	20.4	A	20.7	A	58.3	A	32.2	A	48.8	A	25.7	A	138.2	A	gb:NM_176822.1 /DB_XREF=gi:28827812 /GEN=NALP14 /TID=Hs2Affx.1.14 /CNT=1 /FEA=FLmRNA /TIER=FL /STK=1 /NOTE=sequence(s) not in UniGene /DEF=Homo sapiens NALP14 (NALP14), mRNA. /PROD=NALP14 /FL=gb:NM_176822.1
1553524_at	23.1	A	49.4	A	69.4	A	7.7	A	37.4	A	20	A	97.5	A	27	A	35.4	A	8.5	A	64.5	A	57.1	A	gb:NM_145695.1 /DB_XREF=gi:22027633 /GEN=DGKB /TID=Hs2.158318.2 /CNT=1 /FEA=FLmRNA /TIER=FL /STK=1 /LL=1607 /UG=Hs.158318 /DEF=Homo sapiens diacylglycerol kinase, beta 90kDa (DGKB), transcript variant 2, mRNA. /PROD=diacylglycerol kinase, beta isoform 2 /FL=gb:NM_145695.1
1553525_at	85.9	A	83.8	A	37.2	A	183.7	A	224.2	A	108.4	A	103.5	A	179.3	A	41.2	A	119.1	A	56.3	A	64.6	A	gb:NM_176810.1 /DB_XREF=gi:28827788 /GEN=NALP13 /TID=Hs2Affx.1.15 /CNT=1 /FEA=FLmRNA /TIER=FL /STK=1 /NOTE=sequence(s) not in UniGene /DEF=Homo sapiens NALP13 (NALP13), mRNA. /PROD=NALP13 /FL=gb:NM_176810.1
1553526_at	194	A	295.4	A	196.2	A	84.1	A	200	A	135.3	A	357.8	A	118.6	A	262.1	A	201.7	A	231.7	A	219.3	A	gb:NM_176811.1 /DB_XREF=gi:28827790 /GEN=NALP8 /TID=Hs2Affx.1.16 /CNT=1 /FEA=FLmRNA /TIER=FL /STK=1 /NOTE=sequence(s) not in UniGene /DEF=Homo sapiens NALP8 (NALP8), mRNA. /PROD=NALP8 /FL=gb:NM_176811.1
1553527_at	38.6	A	115.4	A	76	A	122.8	A	141.3	A	164	A	281.3	A	139.1	A	114.5	A	70.3	A	117	A	145.1	A	gb:NM_176820.1 /DB_XREF=gi:28827810 /GEN=NALP9 /TID=Hs2Affx.1.18 /CNT=1 /FEA=FLmRNA /TIER=FL /STK=1 /NOTE=sequence(s) not in UniGene /DEF=Homo sapiens NALP9 (NALP9), mRNA. /PROD=NALP9 /FL=gb:NM_176820.1
1553528_a_at	218.2	P	251.4	P	74.2	P	549.8	P	186.6	P	117.7	P	191.1	M	508.3	P	271.9	P	353.6	P	189.4	P	288.4	P	gb:NM_139052.1 /DB_XREF=gi:21071064 /GEN=TAF5 /TID=Hs2.96103.2 /CNT=1 /FEA=FLmRNA /TIER=FL /STK=1 /LL=6877 /UG=Hs.96103 /DEF=Homo sapiens TAF5 RNA polymerase II, TATA box binding protein (TBP)-associated factor, 100kDa (TAF5), transcript variant 2, mRNA. /PROD=TBP-associated factor 5 isoform 2 /FL=gb:NM_139052.1
1553529_at	93.6	A	23.7	A	20.9	A	28.2	A	95.8	A	58.4	A	235	A	13.9	A	26.4	A	81.6	A	110.4	A	30	A	gb:NM_152232.1 /DB_XREF=gi:22726202 /GEN=TAS1R2 /TID=Hs2.404128.1 /CNT=1 /FEA=FLmRNA /TIER=FL /STK=1 /LL=80834 /UG=Hs.404128 /DEF=Homo sapiens taste receptor, type 1, member 2 (TAS1R2), mRNA. /PROD=taste receptor, type 1, member 2 /FL=gb:NM_152232.1
1553530_a_at	8171.1	P	8297.7	P	5928.7	P	14358.3	P	5986.9	P	7358.1	P	6828.8	P	4441.3	P	9824.5	P	6959.1	P	4219.5	P	12979.4	P	gb:NM_033669.1 /DB_XREF=gi:19743820 /GEN=ITGB1 /TID=Hs2.287797.5 /CNT=1 /FEA=FLmRNA /TIER=FL /STK=1 /LL=3688 /UG=Hs.287797 /DEF=Homo sapiens integrin, beta 1 (fibronectin receptor, beta polypeptide, antigen CD29 includes MDF2, MSK12) (ITGB1), transcript variant 1C-2, mRNA. /PROD=integrin beta 1 isoform 1C-2 precursor /FL=gb:NM_033669.1
1553531_at	16.1	A	64.9	A	14	A	16.2	A	8.2	A	71.7	A	99	A	19.9	A	69.7	A	9.1	A	10.3	A	12	A	gb:NM_138322.1 /DB_XREF=gi:20336185 /GEN=PACE4 /TID=Hs2.170414.8 /CNT=1 /FEA=FLmRNA /TIER=FL /STK=1 /LL=5046 /UG=Hs.170414 /DEF=Homo sapiens paired basic amino acid cleaving system 4 (PACE4), transcript variant 3, mRNA. /PROD=paired basic amino acid cleaving system 4preproprotein isoform c /FL=gb:NM_138322.1
1553532_a_at	34.5	A	182.3	A	12.8	A	46.3	A	38	A	38.5	A	77.6	A	152.9	A	109	A	77.6	A	67.9	A	89.1	A	gb:NM_032819.2 /DB_XREF=gi:18158462 /TID=Hs2.322414.1 /CNT=1 /FEA=FLmRNA /TIER=FL /STK=1 /LL=84905 /UG_GENE=ZNF341 /UG=Hs.322414 /UG_TITLE=zinc finger protein 341 /DEF=Homo sapiens zinc finger protein 341 (ZNF341), mRNA. /FL=gb:NM_032819.2
1553533_at	137.6	P	178.6	M	235.9	P	89.8	M	250.1	P	309.8	P	413.9	M	200	P	365.4	P	338.6	P	317.7	P	204.2	P	gb:NM_020647.1 /DB_XREF=gi:21735574 /GEN=JPH1 /TID=Hs2.378697.1 /CNT=1 /FEA=FLmRNA /TIER=FL /STK=1 /LL=56704 /UG=Hs.378697 /DEF=Homo sapiens junctophilin 1 (JPH1), mRNA. /PROD=junctophilin 1 /FL=gb:NM_020647.1
1553534_at	121.5	P	109.5	A	59.5	A	99.2	A	26.3	A	122.9	P	98.4	A	55.9	A	75.1	A	119.4	P	67.4	A	72.2	A	gb:NM_176821.1 /DB_XREF=gi:28827806 /GEN=NALP10 /TID=Hs2Affx.1.19 /CNT=1 /FEA=FLmRNA /TIER=FL /STK=1 /NOTE=sequence(s) not in UniGene /DEF=Homo sapiens NALP10 (NALP10), mRNA. /PROD=NALP10 /FL=gb:NM_176821.1
1553535_a_at	1394	P	1483.5	P	861.2	P	2826.2	P	1608.2	P	1393.3	P	1403.7	P	3550.6	P	2675.1	P	1560.8	P	2564.5	P	1143.2	P	gb:NM_002883.1 /DB_XREF=gi:4506410 /GEN=RANGAP1 /TID=Hs2.183800.1 /CNT=1 /FEA=FLmRNA /TIER=FL /STK=1 /LL=5905 /UG=Hs.183800 /DEF=Homo sapiens Ran GTPase activating protein 1 (RANGAP1), mRNA. /PROD=Ran GTPase activating protein 1 /FL=gb:NM_002883.1
1553536_at	311.8	P	280.8	P	157.5	A	110.1	M	174.8	A	237.4	P	676	P	68.1	A	115.4	A	177.9	M	177.9	P	104.7	A	gb:NM_018615.2 /DB_XREF=gi:20591480 /TID=Hs2.372571.1 /CNT=1 /FEA=FLmRNA /TIER=FL /STK=1 /LL=55479 /UG_GENE=PRO2032 /UG=Hs.372571 /UG_TITLE=hypothetical protein PRO2032 /DEF=Homo sapiens hypothetical protein PRO2032 (PRO2032), mRNA. /FL=gb:NM_018615.2
1553537_at	8.7	A	17.4	A	9.7	A	15.5	A	8.8	A	30	A	46.6	A	75	A	77.9	A	62.2	A	51.6	A	12.1	A	gb:NM_175068.1 /DB_XREF=gi:28173563 /GEN=KRT6IRS3 /TID=Hs2Affx.1.23 /CNT=1 /FEA=FLmRNA /TIER=FL /STK=1 /NOTE=sequence(s) not in UniGene /DEF=Homo sapiens keratin 6 irs3 (KRT6IRS3), mRNA. /PROD=keratin 6 irs3 /FL=gb:NM_175068.1
1553538_s_at	69720.7	P	44864.2	P	41709.6	P	49908.4	P	51393.2	P	50370.9	P	28688.5	P	48495.7	P	30837.2	P	28577.2	P	35518.3	P	29049.4	P	gb:NM_173704.1 /DB_XREF=gi:27754203 /GEN=MTCO1 /TID=Hs2Affx.1.24 /CNT=1 /FEA=FLmRNA /TIER=FL /STK=1 /NOTE=sequence(s) not in UniGene /DEF=Homo sapiens cytochrome c oxidase I (MTCO1), mRNA. /PROD=cytochrome c oxidase I /FL=gb:NM_173704.1
1553539_at	19.2	A	12.2	A	14.4	A	47.2	A	7.3	A	16.2	A	32	A	18.8	A	14.8	A	14.3	A	10	A	28.9	A	gb:NM_175053.1 /DB_XREF=gi:28173551 /GEN=KRT6IRS4 /TID=Hs2Affx.1.25 /CNT=1 /FEA=FLmRNA /TIER=FL /STK=1 /NOTE=sequence(s) not in UniGene /DEF=Homo sapiens keratin 6 irs4 (KRT6IRS4), mRNA. /PROD=keratin 6 irs4 /FL=gb:NM_175053.1
1553540_a_at	49.9	A	62.6	A	127.1	A	140.5	A	274.1	M	259.9	A	226.9	A	146.1	A	187.9	A	136	A	257.5	A	73.9	A	gb:NM_001532.1 /DB_XREF=gi:10835018 /GEN=SLC29A2 /TID=Hs2.32951.1 /CNT=1 /FEA=FLmRNA /TIER=FL /STK=1 /LL=3177 /UG=Hs.32951 /DEF=Homo sapiens solute carrier family 29 (nucleoside transporters), member 2 (SLC29A2), mRNA. /PROD=solute carrier family 29 (nucleosidetransporters), member 2 /FL=gb:NM_001532.1
1553541_at	5.9	A	14	A	91.7	A	4.7	A	13	A	13.4	A	31	A	4.1	A	98.1	A	14.3	A	15.5	A	13.8	A	gb:NM_177398.1 /DB_XREF=gi:28893580 /GEN=LMX1A /TID=Hs2Affx.1.26 /CNT=1 /FEA=FLmRNA /TIER=FL /STK=1 /NOTE=sequence(s) not in UniGene /DEF=Homo sapiens LIM homeobox transcription factor 1, alpha (LMX1A), transcript variant 6A, mRNA. /PROD=LIM homeobox transcription factor 1, alphaisoform 6A /FL=gb:NM_177398.1
1553542_at	9.2	A	38.9	A	144.9	A	98.3	A	74.2	A	25.9	A	62.5	A	69.7	A	120.6	A	110.9	A	72.7	A	119.2	P	gb:NM_176816.1 /DB_XREF=gi:28827804 /GEN=KENAE /TID=Hs2Affx.1.27 /CNT=1 /FEA=FLmRNA /TIER=FL /STK=1 /NOTE=sequence(s) not in UniGene /DEF=Homo sapiens Kenae (KENAE), mRNA. /PROD=Kenae /FL=gb:NM_176816.1
1553544_at	229.1	A	45.5	A	13.8	A	118.9	A	45.4	A	145.8	A	178.8	A	23.6	A	36.9	A	35.6	A	146.2	A	51.1	A	gb:NM_054021.1 /DB_XREF=gi:16876434 /GEN=GPR101 /TID=Hs2.350569.1 /CNT=1 /FEA=FLmRNA /TIER=FL /STK=1 /LL=83550 /UG=Hs.350569 /DEF=Homo sapiens G protein-coupled receptor 101 (GPR101), mRNA. /PROD=G protein-coupled receptor 101 /FL=gb:NM_054021.1
1553545_at	14.1	A	7.3	A	7.2	A	7.3	A	14.7	A	9.7	A	37.7	A	8.4	A	10.2	A	9.3	A	6.2	A	6.7	A	gb:NM_175924.1 /DB_XREF=gi:28557776 /TID=Hs2Affx.1.28 /CNT=1 /FEA=FLmRNA /TIER=FL /STK=1 /NOTE=sequence(s) not in UniGene /DEF=Homo sapiens hypothetical protein MGC50831 (MGC50831), mRNA. /FL=gb:NM_175924.1
1553546_at	2.6	A	19.3	A	1.1	A	1.5	A	21.6	A	1.3	A	8	A	1.6	A	1.3	A	2.8	A	0.6	A	3.9	A	gb:NM_018614.2 /DB_XREF=gi:20591478 /TID=Hs2.283066.1 /CNT=1 /FEA=FLmRNA /TIER=FL /STK=1 /LL=55478 /UG_GENE=PRO2012 /UG=Hs.283066 /UG_TITLE=hypothetical protein PRO2012 /DEF=Homo sapiens hypothetical protein PRO2012 (PRO2012), mRNA. /FL=gb:NM_018614.2
1553547_at	74.7	A	92.9	A	32.4	A	71.7	A	7.6	A	47.7	A	128.5	A	45.3	P	86.4	A	58.6	A	81.9	A	100.4	A	gb:NM_018605.2 /DB_XREF=gi:27363477 /TID=Hs2.160161.1 /CNT=1 /FEA=FLmRNA /TIER=FL /STK=1 /LL=55469 /UG_GENE=C13orf10 /UG=Hs.160161 /UG_TITLE=chromosome 13 open reading frame 10 /DEF=Homo sapiens chromosome 13 open reading frame 10 (C13orf10), mRNA. /FL=gb:NM_018605.2
1553549_at	47.1	A	14.8	A	21.1	A	61.8	A	95.6	A	23.9	A	36.5	A	10.6	A	13.9	A	19.7	A	10.1	A	22.5	A	gb:NM_173856.1 /DB_XREF=gi:27777672 /GEN=VN1R2 /TID=Hs2.437165.1 /CNT=1 /FEA=FLmRNA /TIER=FL /STK=1 /LL=317701 /UG=Hs.437165 /DEF=Homo sapiens vomeronasal 1 receptor 2 (VN1R2), mRNA. /PROD=vomeronasal 1 receptor 2 /FL=gb:NM_173856.1
1553550_at	27.5	A	69.1	A	20.6	A	17.1	A	32.9	A	17.3	A	28.9	A	21.8	A	28.5	A	15	A	22.6	A	26.4	A	gb:NM_173858.1 /DB_XREF=gi:27777674 /GEN=VN1R5 /TID=Hs2.437167.1 /CNT=1 /FEA=FLmRNA /TIER=FL /STK=1 /LL=317705 /UG=Hs.437167 /DEF=Homo sapiens vomeronasal 1 receptor 5 (VN1R5), mRNA. /PROD=vomeronasal 1 receptor 5 /FL=gb:NM_173858.1
1553551_s_at	54050.9	P	38159.3	P	43952.2	P	44183.7	P	45930	P	49344.2	P	36027.3	P	21268.1	P	41546.2	P	38569.2	P	24230.3	P	33828.6	P	gb:NM_173709.1 /DB_XREF=gi:27754201 /GEN=MTND2 /TID=Hs2Affx.1.29 /CNT=1 /FEA=FLmRNA /TIER=FL /STK=1 /NOTE=sequence(s) not in UniGene /DEF=Homo sapiens NADH dehydrogenase 2 (MTND2), nuclear gene encoding mitochondrial protein, mRNA. /PROD=NADH dehydrogenase 2 /FL=gb:NM_173709.1
1553552_at	32.3	A	17.1	A	9.4	A	19.6	A	11.1	A	15.6	A	52.5	A	5	A	18.3	A	28.8	A	72.7	A	16.4	A	gb:NM_053278.1 /DB_XREF=gi:16751916 /GEN=GPR102 /TID=Hs2.350571.1 /CNT=1 /FEA=FLmRNA /TIER=FL /STK=1 /LL=83551 /UG=Hs.350571 /DEF=Homo sapiens G protein-coupled receptor 102 (GPR102), mRNA. /PROD=G protein-coupled receptor 102 /FL=gb:NM_053278.1
1553553_at	68.6	A	144.4	A	92.5	A	69.5	A	123.1	P	28.6	A	44.9	A	72.7	P	112.5	A	38.8	A	164	A	73	A	gb:NM_176881.1 /DB_XREF=gi:28882025 /GEN=TAS2R39 /TID=Hs2Affx.1.30 /CNT=1 /FEA=FLmRNA /TIER=FL /STK=1 /NOTE=sequence(s) not in UniGene /DEF=Homo sapiens taste receptor, type 2, member39 (TAS2R39), mRNA. /PROD=taste receptor, type 2, member39 /FL=gb:NM_176881.1
1553555_at	56.4	A	51	A	23.2	A	134.2	A	187.3	A	37.4	A	97.8	A	59.7	A	43.6	A	40.5	A	244.8	A	53.6	A	gb:NM_176817.1 /DB_XREF=gi:28827796 /GEN=TAS2R38 /TID=Hs2Affx.1.31 /CNT=1 /FEA=FLmRNA /TIER=FL /STK=1 /NOTE=sequence(s) not in UniGene /DEF=Homo sapiens taste receptor, type 2, member 38 (TAS2R38), mRNA. /PROD=taste receptor, type 2, member 38 /FL=gb:NM_176817.1
1553556_at	157	A	13.9	A	5.7	A	27.6	A	6.2	A	59.7	A	98.1	A	45.2	A	90.3	A	42.7	A	28.7	A	19.7	A	gb:NM_176882.1 /DB_XREF=gi:28882032 /GEN=TAS2R40 /TID=Hs2Affx.1.33 /CNT=1 /FEA=FLmRNA /TIER=FL /STK=1 /NOTE=sequence(s) not in UniGene /DEF=Homo sapiens taste receptor, type 2, member 40 (TAS2R40), mRNA. /PROD=taste receptor, type 2, member 40 /FL=gb:NM_176882.1
1553558_at	24	A	14.7	A	15.6	A	33.4	A	61.3	A	65.9	A	18.8	A	7.5	A	37.7	A	6.8	A	51	A	24	A	gb:NM_176883.1 /DB_XREF=gi:28882027 /GEN=TAS2R41 /TID=Hs2Affx.1.36 /CNT=1 /FEA=FLmRNA /TIER=FL /STK=1 /NOTE=sequence(s) not in UniGene /DEF=Homo sapiens taste receptor, type 2, member 41 (TAS2R41), mRNA. /PROD=taste receptor, type 2, member 41 /FL=gb:NM_176883.1
1553559_at	216.8	A	230.4	A	316.5	M	91.1	A	268.6	A	223.9	A	321.3	A	153.4	A	687.8	P	577.9	P	421.4	P	450.9	P	gb:NM_173490.1 /DB_XREF=gi:28557783 /TID=Hs2Affx.1.38 /CNT=1 /FEA=FLmRNA /TIER=FL /STK=1 /NOTE=sequence(s) not in UniGene /DEF=Homo sapiens hypothetical protein LOC134285 (LOC134285), mRNA. /FL=gb:NM_173490.1
1553560_at	17.6	A	27.4	A	67	A	14	A	118.2	A	10.9	A	44.9	A	13	A	36.7	A	93.9	A	27	A	27.9	A	gb:NM_173857.1 /DB_XREF=gi:27777668 /GEN=VN1R4 /TID=Hs2.437166.1 /CNT=1 /FEA=FLmRNA /TIER=FL /STK=1 /LL=317703 /UG=Hs.437166 /DEF=Homo sapiens vomeronasal 1 receptor 4 (VN1R4), mRNA. /PROD=vomeronasal 1 receptor 4 /FL=gb:NM_173857.1
1553561_at	51.4	A	120.5	P	19.8	A	19.1	A	60.5	A	46	A	111.6	A	59.3	A	79.7	P	64.9	P	8.1	A	72.5	P	gb:NM_176890.1 /DB_XREF=gi:28882038 /GEN=TAS2R50 /TID=Hs2Affx.1.39 /CNT=1 /FEA=FLmRNA /TIER=FL /STK=1 /NOTE=sequence(s) not in UniGene /DEF=Homo sapiens taste receptor, type 2, member 50 (TAS2R50), mRNA. /PROD=taste receptor, type 2, member 50 /FL=gb:NM_176890.1
1553562_at	90.2	A	49.2	A	142	A	37.8	A	10	A	40.1	A	159.5	A	33.9	A	95.7	A	119.8	A	86.3	A	66.6	A	gb:NM_172100.1 /DB_XREF=gi:27886632 /GEN=CD8B1 /TID=Hs2Affx.1.40 /CNT=1 /FEA=FLmRNA /TIER=FL /STK=1 /NOTE=sequence(s) not in UniGene /DEF=Homo sapiens CD8 antigen, beta polypeptide 1 (p37) (CD8B1), transcript variant 6, mRNA. /PROD=CD8 antigen beta polypeptide 1 isoform 6precursor /FL=gb:NM_172100.1
1553564_at	261.3	A	247.2	A	130.2	A	63	A	60.6	A	87.9	A	19.5	A	129.6	A	140.8	A	152.1	A	147.5	A	111.1	A	gb:NM_080676.2 /DB_XREF=gi:27363462 /TID=Hs2.437091.1 /CNT=1 /FEA=FLmRNA /TIER=FL /STK=1 /LL=140733 /UG_GENE=C20orf133 /UG=Hs.437091 /UG_TITLE=chromosome 20 open reading frame 133 /DEF=Homo sapiens chromosome 20 open reading frame 133 (C20orf133), mRNA. /FL=gb:NM_080676.2
1553565_s_at	11.3	A	22.1	A	7.7	A	168.3	P	110.4	P	125.8	A	27.1	A	15.8	A	139.1	A	104.9	A	7.7	A	14.2	A	gb:NM_012137.1 /DB_XREF=gi:6912327 /GEN=DDAH1 /TID=Hs2.380870.1 /CNT=1 /FEA=FLmRNA /TIER=FL /STK=1 /LL=23576 /UG=Hs.380870 /DEF=Homo sapiens dimethylarginine dimethylaminohydrolase 1 (DDAH1), mRNA. /PROD=dimethylarginine dimethylaminohydrolase 1 /FL=gb:NM_012137.1
1553566_at	71.2	A	74.8	A	142.4	A	46.3	A	43	A	163.3	A	46.3	A	59.2	A	93.8	A	140	A	123.4	A	68.7	A	gb:NM_153685.1 /DB_XREF=gi:24308546 /TID=Hs2.44067.1 /CNT=1 /FEA=FLmRNA /TIER=FL /STK=1 /LL=196500 /UG_GENE=DKFZp547D2210 /UG=Hs.44067 /UG_TITLE=hypothetical protein DKFZp547D2210 /DEF=Homo sapiens hypothetical protein DKFZp547D2210 (DKFZp547D2210), mRNA. /FL=gb:NM_153685.1
1553567_s_at	61684	P	45302.9	P	53119.8	P	37587.4	P	56194.8	P	46731.1	P	38464.6	P	40369.3	P	41842.5	P	43220.4	P	42773	P	32336.3	P	gb:NM_173702.1 /DB_XREF=gi:27754207 /GEN=MTATP6 /TID=Hs2Affx.1.41 /CNT=1 /FEA=FLmRNA /TIER=FL /STK=1 /NOTE=sequence(s) not in UniGene /DEF=Homo sapiens ATP synthase 6 (MTATP6), nuclear gene encoding mitochondrial protein, mRNA. /PROD=ATP synthase 6 /FL=gb:NM_173702.1
1553568_a_at	265.3	A	231.4	A	106	A	27.8	A	67.1	A	136.1	A	46.9	A	82.7	A	216.4	A	110.1	A	160.3	A	107.2	A	gb:NM_005323.3 /DB_XREF=gi:20544167 /GEN=HIST1H1T /TID=Hs2.123064.1 /CNT=1 /FEA=FLmRNA /TIER=FL /STK=1 /LL=3010 /UG=Hs.123064 /DEF=Homo sapiens histone 1, H1t (HIST1H1T), mRNA. /PROD=H1 histone family, member T, testis-specific /FL=gb:NM_005323.3
1553569_at	73283.3	P	54195.2	P	62557.1	P	49988.6	P	68596.2	P	62109.9	P	46358.6	P	53002.6	P	54429.8	P	49180.6	P	54751.1	P	39387.5	P	gb:NM_173705.1 /DB_XREF=gi:27754205 /GEN=MTCO2 /TID=Hs2Affx.1.43 /CNT=1 /FEA=FLmRNA /TIER=FL /STK=1 /NOTE=sequence(s) not in UniGene /DEF=Homo sapiens cytochrome c oxidase II (MTCO2), mRNA. /PROD=cytochrome c oxidase II /FL=gb:NM_173705.1
1553570_x_at	73650.5	P	60072.6	P	67701.1	P	58774.3	P	74424.3	P	63037.2	P	50277.4	P	56087.6	P	55405.3	P	53745.2	P	55581.9	P	39899.3	P	gb:NM_173705.1 /DB_XREF=gi:27754205 /GEN=MTCO2 /TID=Hs2Affx.1.43 /CNT=1 /FEA=FLmRNA /TIER=FL /STK=1 /NOTE=sequence(s) not in UniGene /DEF=Homo sapiens cytochrome c oxidase II (MTCO2), mRNA. /PROD=cytochrome c oxidase II /FL=gb:NM_173705.1
1553572_a_at	2650.3	P	3215.5	P	2675.7	P	55.5	A	6544	P	916.5	P	41.5	A	487.5	P	182.9	A	762.2	P	1487.4	P	503.8	P	gb:NM_134268.2 /DB_XREF=gi:21361779 /GEN=CYGB /TID=Hs2.95120.1 /CNT=1 /FEA=FLmRNA /TIER=FL /STK=1 /LL=114757 /UG=Hs.95120 /DEF=Homo sapiens cytoglobin (CYGB), mRNA. /PROD=cytoglobin /FL=gb:NM_134268.2
1553573_s_at	54.7	A	26.8	A	13.8	A	13.3	A	45.3	A	19.9	A	75.9	A	9.3	A	16.8	A	19.4	A	21.8	A	22	A	gb:NM_001405.2 /DB_XREF=gi:27894380 /GEN=EFNA2 /TID=Hs2Affx.1.44 /CNT=1 /FEA=FLmRNA /TIER=FL /STK=1 /NOTE=sequence(s) not in UniGene /DEF=Homo sapiens ephrin-A2 (EFNA2), mRNA. /PROD=ephrin-A2 precursor /FL=gb:NM_001405.2
1553574_at	83.9	A	58.9	A	65.6	A	65.8	A	77	P	50.4	A	102.1	A	18.9	A	86.9	A	87.7	A	94.1	A	78.1	P	gb:NM_176891.1 /DB_XREF=gi:28882044 /GEN=IFNT1 /TID=Hs2Affx.1.45 /CNT=1 /FEA=FLmRNA /TIER=FL /STK=1 /NOTE=sequence(s) not in UniGene /DEF=Homo sapiens interferon tau-1 (IFNT1), mRNA. /PROD=interferon tau-1 /FL=gb:NM_176891.1
1553575_at	2129.1	P	1138.4	P	1018.1	P	574.8	P	982.5	P	968.7	P	949.3	P	865.4	P	1103.2	P	1141.4	P	1025.3	P	1067.5	P	gb:NM_173714.1 /DB_XREF=gi:27754187 /GEN=MTND6 /TID=Hs2Affx.1.46 /CNT=1 /FEA=FLmRNA /TIER=FL /STK=1 /NOTE=sequence(s) not in UniGene /DEF=Homo sapiens NADH dehydrogenase 6 (MTND6), mRNA. /PROD=NADH dehydrogenase 6 /FL=gb:NM_173714.1
1553579_a_at	41.7	A	7.2	A	16.9	A	24.6	A	25.4	A	86	A	11.4	A	2.1	A	6.5	A	2.4	A	4.6	A	3.3	A	gb:NM_058206.1 /DB_XREF=gi:17402932 /GEN=SPAG11 /TID=Hs2.2717.6 /CNT=1 /FEA=FLmRNA /TIER=FL /STK=1 /LL=10407 /UG=Hs.2717 /DEF=Homo sapiens sperm associated antigen 11 (SPAG11), transcript variant B, mRNA. /PROD=sperm associated antigen 11, isoform Bprecursor /FL=gb:NM_058206.1
1553581_s_at	1402.4	P	1097.4	P	2291.7	P	897.1	P	1494.8	P	1644.6	P	978.2	P	1537.2	P	1704.3	P	1877.3	P	1598.3	P	1716	P	gb:NM_173829.1 /DB_XREF=gi:27883881 /TID=Hs2Affx.1.49 /CNT=1 /FEA=FLmRNA /TIER=FL /STK=1 /NOTE=sequence(s) not in UniGene /DEF=Homo sapiens hypothetical protein FLJ36754 (FLJ36754), mRNA. /FL=gb:NM_173829.1
1553582_a_at	112.8	P	103.9	A	91.8	A	98.2	P	71.1	A	82.3	P	203.1	P	93.8	P	164.8	P	102.6	P	67.4	A	73.8	P	gb:NM_058207.1 /DB_XREF=gi:17402934 /GEN=SPAG11 /TID=Hs2.2717.7 /CNT=1 /FEA=FLmRNA /TIER=FL /STK=1 /LL=10407 /UG=Hs.2717 /DEF=Homo sapiens sperm associated antigen 11 (SPAG11), transcript variant E, mRNA. /PROD=sperm associated antigen 11, isoform Eprecursor /FL=gb:NM_058207.1
1553583_a_at	188.2	A	95.5	A	159.8	A	97.4	A	144.9	A	137.3	A	139.1	A	77.5	A	184.9	M	119.5	A	141.1	A	37.7	A	gb:NM_003251.1 /DB_XREF=gi:4507496 /GEN=THRSP /TID=Hs2.91877.1 /CNT=1 /FEA=FLmRNA /TIER=FL /STK=1 /LL=7069 /UG=Hs.91877 /DEF=Homo sapiens thyroid hormone responsive (SPOT14 homolog, rat) (THRSP), mRNA. /PROD=thyroid hormone responsive (SPOT14 homolog,rat) /FL=gb:NM_003251.1
1553584_at	171	A	36.4	A	196.3	A	17.8	A	142.8	A	109.8	A	57.7	A	13.9	A	57.8	A	28.2	A	165.8	A	31.3	A	gb:NM_176819.1 /DB_XREF=gi:28827802 /TID=Hs2Affx.1.50 /CNT=1 /FEA=FLmRNA /TIER=FL /STK=1 /NOTE=sequence(s) not in UniGene /DEF=Homo sapiens hypothetical protein LOC286399 (LOC286399), mRNA. /FL=gb:NM_176819.1
1553585_a_at	125.2	A	6	A	77.8	A	80.4	A	125.6	A	16.4	A	42.1	A	20.8	A	71.2	A	99.7	A	70	A	27.9	A	gb:NM_021049.1 /DB_XREF=gi:10567817 /GEN=MAGEA5 /TID=Hs2.37108.1 /CNT=1 /FEA=FLmRNA /TIER=FL /STK=1 /LL=4104 /UG=Hs.37108 /DEF=Homo sapiens melanoma antigen, family A, 5 (MAGEA5), mRNA. /PROD=melanoma antigen, family A, 5 /FL=gb:NM_021049.1
1553586_at	193.9	A	105	A	73.6	A	94.3	A	63.2	A	127.4	A	119.7	A	29.4	A	45.6	A	71.6	A	148.3	A	63.7	A	gb:NM_175901.1 /DB_XREF=gi:28557734 /TID=Hs2Affx.1.51 /CNT=1 /FEA=FLmRNA /TIER=FL /STK=1 /NOTE=sequence(s) not in UniGene /DEF=Homo sapiens hypothetical protein LOC283932 (LOC283932), mRNA. /FL=gb:NM_175901.1
1553587_a_at	1130.4	P	1094.9	P	1021	P	1440.8	P	1615.3	P	1779.5	P	1119.5	P	1849.4	P	1781.3	P	1339.5	P	1402.3	P	3071.4	P	gb:NM_019896.1 /DB_XREF=gi:9845280 /GEN=POLE4 /TID=Hs2.19980.1 /CNT=1 /FEA=FLmRNA /TIER=FL /STK=1 /LL=56655 /UG=Hs.19980 /DEF=Homo sapiens polymerase (DNA-directed), epsilon 4 (p12 subunit) (POLE4), mRNA. /PROD=polymerase (DNA-directed), epsilon 4 (p12subunit) /FL=gb:NM_019896.1
1553588_at	62044.1	P	46094.6	P	57646.1	P	45410.2	P	56235.2	P	56215.4	P	39298.8	P	49786.7	P	43367.9	P	45165	P	47080.9	P	37199.4	P	gb:NM_173710.1 /DB_XREF=gi:27754195 /GEN=MTND3 /TID=Hs2Affx.1.52 /CNT=1 /FEA=FLmRNA /TIER=FL /STK=1 /NOTE=sequence(s) not in UniGene /DEF=Homo sapiens NADH dehydrogenase 3 (MTND3), mRNA. /PROD=NADH dehydrogenase 3 /FL=gb:NM_173710.1
1553589_a_at	19.5	A	18.9	A	17.7	A	59.7	A	131	A	67.4	A	65.3	A	5.1	A	74.8	A	36.6	A	47.7	A	24.3	A	gb:NM_005764.2 /DB_XREF=gi:22550108 /GEN=DD96 /TID=Hs2.271473.1 /CNT=1 /FEA=FLmRNA /TIER=FL /STK=1 /LL=10158 /UG=Hs.271473 /DEF=Homo sapiens epithelial protein up-regulated in carcinoma, membrane associated protein 17 (DD96), mRNA. /PROD=epithelial protein up-regulated in carcinoma,membrane associate /FL=gb:NM_005764.2
1553590_at	13.3	A	25.3	A	14.2	A	88.4	A	12	A	31.1	A	45.1	A	58.1	A	17.8	A	9.9	A	13.6	A	16.3	A	gb:NM_175923.1 /DB_XREF=gi:28557774 /TID=Hs2Affx.1.53 /CNT=1 /FEA=FLmRNA /TIER=FL /STK=1 /NOTE=sequence(s) not in UniGene /DEF=Homo sapiens hypothetical protein MGC42630 (MGC42630), mRNA. /FL=gb:NM_175923.1
1553591_at	104.9	A	51.9	A	97.7	A	67.4	A	26.3	A	11.3	A	24.9	A	30.1	A	43.7	A	91	A	15.4	A	42.7	A	gb:NM_080842.1 /DB_XREF=gi:18266677 /TID=Hs2Affx.1.54 /CNT=1 /FEA=FLmRNA /TIER=FL /STK=1 /NOTE=sequence(s) not in UniGene /DEF=Homo sapiens hypothetical gene similar to gamma-glutamyltransferase-like activity 1 (LOC129026), mRNA. /FL=gb:NM_080842.1
1553592_x_at	97	A	163.6	A	98.9	A	12.8	A	56.8	A	189.3	A	28.6	A	53.2	A	302.9	A	107.6	A	99.1	A	130.3	A	gb:NM_080842.1 /DB_XREF=gi:18266677 /TID=Hs2Affx.1.54 /CNT=1 /FEA=FLmRNA /TIER=FL /STK=1 /NOTE=sequence(s) not in UniGene /DEF=Homo sapiens hypothetical gene similar to gamma-glutamyltransferase-like activity 1 (LOC129026), mRNA. /FL=gb:NM_080842.1
1553593_a_at	11.8	A	11.7	A	11.4	A	4.4	A	10.6	A	28	A	51	A	16.6	A	17.2	A	14.2	A	18.1	A	25.8	A	gb:NM_005421.1 /DB_XREF=gi:4885618 /GEN=TAL2 /TID=Hs2.247978.1 /CNT=1 /FEA=FLmRNA /TIER=FL /STK=1 /LL=6887 /UG=Hs.247978 /DEF=Homo sapiens T-cell acute lymphocytic leukemia 2 (TAL2), mRNA. /PROD=T-cell acute lymphocytic leukemia 2 /FL=gb:NM_005421.1
1553594_a_at	950.4	P	826.5	P	792.2	P	621.4	P	605.3	P	831.6	P	1029.4	P	552.7	P	717.9	P	706.9	P	719.6	P	721.1	P	gb:NM_005543.1 /DB_XREF=gi:5031802 /GEN=INSL3 /TID=Hs2.37062.1 /CNT=1 /FEA=FLmRNA /TIER=FL /STK=1 /LL=3640 /UG=Hs.37062 /DEF=Homo sapiens insulin-like 3 (Leydig cell) (INSL3), mRNA. /PROD=insulin-like 3 (Leydig cell) /FL=gb:NM_005543.1
1553599_a_at	135	A	53.1	A	30	A	79.5	A	98.3	A	83	A	97.6	A	71.2	A	94.4	A	99.5	A	93.7	A	55.2	A	gb:AF492003.1 /DB_XREF=gi:22770471 /GEN=SYCP3 /TID=Hs2.326538.1 /CNT=31 /FEA=FLmRNA /TIER=FL+Stack /STK=12 /LL=50511 /UG=Hs.326538 /DEF=Homo sapiens synaptonemal complex protein 3 (SYCP3) mRNA, complete cds. /PROD=synaptonemal complex protein 3 /FL=gb:AF492003.1 gb:NM_153694.1
1553600_at	26.3	A	14.8	A	212.8	A	62.8	A	9.1	A	52.5	A	22.1	A	35.7	A	93.5	A	16.2	A	58.4	A	54.9	A	gb:NM_147196.1 /DB_XREF=gi:22218346 /GEN=TMIE /TID=Hs2.185777.1 /CNT=24 /FEA=FLmRNA /TIER=FL+Stack /STK=12 /LL=259236 /UG=Hs.185777 /DEF=Homo sapiens transmembrane inner ear protein (TMIE), mRNA. /PROD=transmembrane inner ear protein /FL=gb:NM_147196.1 gb:AY081842.1
1553601_a_at	25.3	A	28.5	A	82.7	A	3.2	A	11	A	11.7	A	35.5	A	14.3	A	16.1	A	11.8	A	18.8	A	23	A	gb:NM_147196.1 /DB_XREF=gi:22218346 /GEN=TMIE /TID=Hs2.185777.1 /CNT=24 /FEA=FLmRNA /TIER=FL+Stack /STK=12 /LL=259236 /UG=Hs.185777 /DEF=Homo sapiens transmembrane inner ear protein (TMIE), mRNA. /PROD=transmembrane inner ear protein /FL=gb:NM_147196.1 gb:AY081842.1
1553602_at	66.7	A	264.9	A	146.8	A	162.3	A	116.7	A	66	A	1410.4	P	77.4	A	67.3	A	29.3	A	133.7	A	102.3	A	gb:NM_058173.1 /DB_XREF=gi:17158004 /GEN=LOC118430 /TID=Hs2.348419.1 /CNT=27 /FEA=FLmRNA /TIER=FL+Stack /STK=8 /LL=118430 /UG=Hs.348419 /DEF=Homo sapiens small breast epithelial mucin (LOC118430), mRNA. /PROD=small breast epithelial mucin /FL=gb:AF414087.1 gb:NM_058173.1
1553603_s_at	338.5	P	364.1	P	264.5	P	619.2	P	304.3	P	302.5	P	327.5	P	281.8	P	402.8	P	362.3	P	421.3	P	415.2	P	gb:NM_022374.1 /DB_XREF=gi:11641302 /TID=Hs2.27099.1 /CNT=17 /FEA=FLmRNA /TIER=FL /STK=4 /LL=64225 /UG_GENE=ARL6IP2 /UG=Hs.27099 /UG_TITLE=ADP-ribosylation-like factor 6 interacting protein 2 /DEF=Homo sapiens ADP-ribosylation-like factor 6 interacting protein 2 (ARL6IP2), mRNA. /FL=gb:NM_022374.1
1553604_at	1	A	3.6	A	25.3	A	16.9	A	7.4	A	3.5	A	6	A	1	A	24.4	A	0.4	A	4	A	8.9	A	gb:NM_152701.1 /DB_XREF=gi:22749398 /TID=Hs2.226568.1 /CNT=8 /FEA=FLmRNA /TIER=FL /STK=3 /LL=206568 /UG_GENE=FLJ33951 /UG=Hs.226568 /UG_TITLE=hypothetical protein FLJ33951 /DEF=Homo sapiens hypothetical protein FLJ33951 (FLJ33951), mRNA. /FL=gb:NM_152701.1
1553605_a_at	4	A	34.7	A	1.9	A	12.8	A	16	A	21.2	A	33.6	A	2	A	44.7	A	0.3	A	14.2	A	1.2	A	gb:NM_152701.1 /DB_XREF=gi:22749398 /TID=Hs2.226568.1 /CNT=8 /FEA=FLmRNA /TIER=FL /STK=3 /LL=206568 /UG_GENE=FLJ33951 /UG=Hs.226568 /UG_TITLE=hypothetical protein FLJ33951 /DEF=Homo sapiens hypothetical protein FLJ33951 (FLJ33951), mRNA. /FL=gb:NM_152701.1
1553607_at	37.9	A	3.2	A	18	A	15	A	13.5	A	46.6	M	63.8	A	1.4	A	52.8	A	56.4	A	2.2	A	24.8	A	gb:NM_138968.1 /DB_XREF=gi:20373184 /TID=Hs2.282882.1 /CNT=5 /FEA=FLmRNA /TIER=FL /STK=3 /LL=193629 /UG_GENE=C21orf109 /UG=Hs.282882 /UG_TITLE=chromosome 21 open reading frame 109 /DEF=Homo sapiens chromosome 21 open reading frame 109 (C21orf109), mRNA. /FL=gb:NM_138968.1 gb:AF490769.1
1553608_a_at	5.9	A	5.1	A	8.7	A	17.5	A	1.5	A	359.5	P	627.8	P	34.6	A	62	A	275.4	P	14.8	A	135.5	P	gb:NM_138968.1 /DB_XREF=gi:20373184 /TID=Hs2.282882.1 /CNT=5 /FEA=FLmRNA /TIER=FL /STK=3 /LL=193629 /UG_GENE=C21orf109 /UG=Hs.282882 /UG_TITLE=chromosome 21 open reading frame 109 /DEF=Homo sapiens chromosome 21 open reading frame 109 (C21orf109), mRNA. /FL=gb:NM_138968.1 gb:AF490769.1
1553611_s_at	266.7	A	188	A	64.7	A	73.5	A	117.2	A	119.5	A	192.8	A	85.8	A	162	A	114.5	A	130.6	A	83.6	A	gb:NM_173583.1 /DB_XREF=gi:27734800 /TID=Hs2.292451.1 /CNT=36 /FEA=FLmRNA /TIER=FL /STK=2 /LL=283212 /UG_GENE=FLJ33790 /UG=Hs.292451 /UG_TITLE=hypothetical protein FLJ33790 /DEF=Homo sapiens hypothetical protein FLJ33790 (FLJ33790), mRNA. /FL=gb:NM_173583.1
1553612_at	160.8	P	148.3	P	134.3	P	55.2	P	95.4	P	159.1	P	190.9	P	135.7	P	131.4	P	117.5	P	173	P	181.6	P	gb:NM_058230.1 /DB_XREF=gi:17530790 /TID=Hs2.325804.1 /CNT=16 /FEA=FLmRNA /TIER=FL /STK=2 /LL=117608 /UG_GENE=ZNF354B /UG=Hs.325804 /UG_TITLE=zinc finger protein 354B /DEF=Homo sapiens zinc finger protein 354B (ZNF354B), mRNA. /FL=gb:NM_058230.1
1553613_s_at	9.4	A	93.4	A	271.7	P	385.6	P	270.1	P	310.7	P	491.4	P	213.7	P	164.6	P	481	P	313.6	P	279.9	P	gb:NM_001453.1 /DB_XREF=gi:4503734 /GEN=FOXC1 /TID=Hs2.348883.1 /CNT=16 /FEA=FLmRNA /TIER=FL /STK=2 /LL=2296 /UG=Hs.348883 /DEF=Homo sapiens forkhead box C1 (FOXC1), mRNA. /PROD=forkhead box C1 /FL=gb:NM_001453.1
1553614_a_at	137	A	60.1	A	27.6	A	8.3	A	8.7	A	164.7	A	612.8	P	1650.7	P	86.2	A	313	P	236.3	P	11.4	A	gb:NM_173604.1 /DB_XREF=gi:27734762 /TID=Hs2.166754.1 /CNT=9 /FEA=FLmRNA /TIER=FL /STK=2 /LL=283492 /UG_GENE=FLJ25694 /UG=Hs.166754 /UG_TITLE=hypothetical protein FLJ25694 /DEF=Homo sapiens hypothetical protein FLJ25694 (FLJ25694), mRNA. /FL=gb:NM_173604.1
1553618_at	15.1	A	13.1	A	7.2	A	31.7	A	19.2	A	42	A	22.6	A	7.4	A	27.2	A	9.9	A	14.1	A	65.7	A	gb:NM_138800.1 /DB_XREF=gi:20270352 /TID=Hs2.232026.1 /CNT=8 /FEA=FLmRNA /TIER=FL /STK=2 /LL=129868 /UG_GENE=TRIM43 /UG=Hs.232026 /UG_TITLE=tripartite motif-containing 43 /DEF=Homo sapiens tripartite motif-containing 43 (TRIM43), mRNA. /FL=gb:NM_138800.1 gb:BC015353.1
1553619_a_at	219.3	A	71.8	A	13	A	31.2	A	20.2	A	19.7	A	126.5	A	17.2	A	17.7	A	36.3	A	63.2	A	76.7	A	gb:NM_138800.1 /DB_XREF=gi:20270352 /TID=Hs2.232026.1 /CNT=8 /FEA=FLmRNA /TIER=FL /STK=2 /LL=129868 /UG_GENE=TRIM43 /UG=Hs.232026 /UG_TITLE=tripartite motif-containing 43 /DEF=Homo sapiens tripartite motif-containing 43 (TRIM43), mRNA. /FL=gb:NM_138800.1 gb:BC015353.1
1553620_at	7.9	A	6.3	A	11.9	A	5.6	A	6.6	A	20.4	A	26.6	A	6.1	A	6.3	A	4.5	A	9.3	A	6.8	A	gb:NM_152616.2 /DB_XREF=gi:28195389 /GEN=TRIM42 /TID=Hs2.368559.1 /CNT=6 /FEA=FLmRNA /TIER=FL /STK=2 /LL=287015 /UG=Hs.368559 /DEF=Homo sapiens tripartite motif-containing 42 (TRIM42), mRNA. /PROD=tripartite motif-containing 42 /FL=gb:NM_152616.2 gb:AF521868.1
1553622_a_at	4.7	A	66.7	A	2	A	49.2	A	28.2	A	4.1	A	37.1	A	3.7	A	52.8	A	66.5	P	14	A	39.3	A	gb:NM_152597.1 /DB_XREF=gi:22749226 /TID=Hs2.129598.1 /CNT=6 /FEA=FLmRNA /TIER=FL /STK=2 /LL=161835 /UG_GENE=FLJ35989 /UG=Hs.129598 /UG_TITLE=hypothetical protein FLJ35989 /DEF=Homo sapiens hypothetical protein FLJ35989 (FLJ35989), mRNA. /FL=gb:NM_152597.1
1553623_at	8.3	A	10.9	A	5.9	A	12.7	A	163.1	A	20.4	A	30.6	A	5.9	A	13.6	A	83.3	A	41.4	A	78.4	A	gb:NM_032757.1 /DB_XREF=gi:14249395 /TID=Hs2.231851.1 /CNT=7 /FEA=FLmRNA /TIER=FL /STK=2 /LL=84843 /UG_GENE=MGC15705 /UG=Hs.231851 /UG_TITLE=hypothetical protein MGC15705 /DEF=Homo sapiens hypothetical protein MGC15705 (MGC15705), mRNA. /FL=gb:BC007304.1 gb:NM_032757.1
1553625_at	24	A	40.1	P	23.5	A	7.8	A	24.3	A	0.5	A	32.7	A	0.8	A	13.1	A	28.1	A	13.2	P	15	A	gb:NM_173611.1 /DB_XREF=gi:27734702 /TID=Hs2.6799.1 /CNT=5 /FEA=FLmRNA /TIER=FL /STK=2 /LL=283742 /UG_GENE=FLJ38426 /UG=Hs.6799 /UG_TITLE=hypothetical protein FLJ38426 /DEF=Homo sapiens hypothetical protein FLJ38426 (FLJ38426), mRNA. /FL=gb:NM_173611.1
1553626_a_at	70.6	P	95.4	A	21.1	A	57.5	A	60.1	A	84	A	112.9	A	16.6	A	44	A	80.8	A	65.7	A	106.3	P	gb:NM_152347.1 /DB_XREF=gi:22748752 /TID=Hs2.278056.1 /CNT=4 /FEA=FLmRNA /TIER=FL /STK=2 /LL=124989 /UG_GENE=FLJ40342 /UG=Hs.278056 /UG_TITLE=hypothetical protein FLJ40342 /DEF=Homo sapiens hypothetical protein FLJ40342 (FLJ40342), mRNA. /FL=gb:NM_152347.1
1553627_s_at	8.8	A	4.8	A	31.4	A	62.7	A	90.2	A	27.8	A	122.1	A	7	A	83.8	P	41.7	A	41.4	A	15.3	A	gb:NM_152347.1 /DB_XREF=gi:22748752 /TID=Hs2.278056.1 /CNT=4 /FEA=FLmRNA /TIER=FL /STK=2 /LL=124989 /UG_GENE=FLJ40342 /UG=Hs.278056 /UG_TITLE=hypothetical protein FLJ40342 /DEF=Homo sapiens hypothetical protein FLJ40342 (FLJ40342), mRNA. /FL=gb:NM_152347.1
1553629_a_at	13	A	12.8	A	17.6	A	6.5	A	18.8	A	15	A	42.1	A	9.1	A	16.4	A	15.3	A	11.7	A	12.5	A	gb:NM_130899.1 /DB_XREF=gi:18702326 /TID=Hs2.125487.1 /CNT=20 /FEA=FLmRNA /TIER=FL /STK=1 /LL=153745 /UG_GENE=MGC26988 /UG=Hs.125487 /UG_TITLE=hypothetical protein MGC26988 /DEF=Homo sapiens hypothetical protein MGC26988 (MGC26988), mRNA. /FL=gb:BC025409.1 gb:BC025397.1 gb:NM_130899.1 gb:BC022035.1 gb:BC025998.1
1553630_at	3.3	A	8.6	A	22.4	A	7	A	9.7	A	38.6	A	23.9	A	4.9	A	24.8	A	72.3	A	11.1	A	6.1	A	gb:NM_173554.1 /DB_XREF=gi:27734884 /TID=Hs2.252954.1 /CNT=13 /FEA=FLmRNA /TIER=FL /STK=1 /LL=219621 /UG_GENE=MGC44593 /UG=Hs.252954 /UG_TITLE=hypothetical protein MGC44593 /DEF=Homo sapiens hypothetical protein MGC44593 (MGC44593), mRNA. /FL=gb:BC041932.1 gb:NM_173554.1
1553633_s_at	77.8	A	134	A	144.1	A	8.2	A	21.4	A	45.6	A	37.5	A	25	A	59.7	A	17.1	A	39.5	A	66.2	A	gb:NM_139173.1 /DB_XREF=gi:21040264 /TID=Hs2.375575.1 /CNT=16 /FEA=FLmRNA /TIER=FL /STK=1 /LL=150159 /UG_GENE=LOC150159 /UG=Hs.375575 /UG_TITLE=CG10806-like /DEF=Homo sapiens CG10806-like (LOC150159), mRNA. /FL=gb:NM_139173.1
1553634_a_at	136	A	104.9	A	17.6	A	154	M	158.2	A	15.4	A	101.6	A	22.7	A	110.5	P	104.5	A	26.4	A	61.6	A	gb:NM_173677.1 /DB_XREF=gi:27734968 /TID=Hs2.17589.1 /CNT=12 /FEA=FLmRNA /TIER=FL /STK=1 /LL=285962 /UG_GENE=FLJ40852 /UG=Hs.17589 /UG_TITLE=hypothetical protein FLJ40852 /DEF=Homo sapiens hypothetical protein FLJ40852 (FLJ40852), mRNA. /FL=gb:NM_173677.1
1553635_s_at	109.1	A	98.6	A	6.1	A	5.7	A	24.8	A	81.8	A	16.9	A	43.6	A	21.1	A	36.4	A	7.6	A	21.8	A	gb:NM_152665.1 /DB_XREF=gi:22749350 /TID=Hs2.189192.1 /CNT=17 /FEA=FLmRNA /TIER=FL /STK=1 /LL=200132 /UG_GENE=FLJ40873 /UG=Hs.189192 /UG_TITLE=hypothetical protein FLJ40873 /DEF=Homo sapiens hypothetical protein FLJ40873 (FLJ40873), mRNA. /FL=gb:NM_152665.1
1553636_at	3.7	A	6.7	A	3.6	A	12.1	A	2.2	A	5.4	A	25.8	A	2.9	A	15.2	A	12.7	A	9.4	A	1.1	A	gb:NM_152453.1 /DB_XREF=gi:22748958 /TID=Hs2.179646.1 /CNT=10 /FEA=FLmRNA /TIER=FL /STK=1 /LL=145942 /UG_GENE=MGC35118 /UG=Hs.179646 /UG_TITLE=hypothetical protein MGC35118 /DEF=Homo sapiens hypothetical protein MGC35118 (MGC35118), mRNA. /FL=gb:BC029221.1 gb:NM_152453.1
1553637_s_at	168	A	239.8	A	127.7	A	88	A	94.6	A	173.2	A	432.3	A	112.8	P	224.4	P	154.1	M	167.2	A	129.7	A	gb:NM_152453.1 /DB_XREF=gi:22748958 /TID=Hs2.179646.1 /CNT=10 /FEA=FLmRNA /TIER=FL /STK=1 /LL=145942 /UG_GENE=MGC35118 /UG=Hs.179646 /UG_TITLE=hypothetical protein MGC35118 /DEF=Homo sapiens hypothetical protein MGC35118 (MGC35118), mRNA. /FL=gb:BC029221.1 gb:NM_152453.1
1553639_a_at	171.9	A	259.2	A	17.4	A	118.2	A	210.7	A	101.2	A	51.3	A	162.6	A	25.2	A	133.7	A	181.4	A	120.4	A	gb:NM_133263.1 /DB_XREF=gi:18959207 /GEN=PERC /TID=Hs2.248652.1 /CNT=8 /FEA=FLmRNA /TIER=FL /STK=1 /LL=133522 /UG=Hs.248652 /DEF=Homo sapiens peroxisome proliferator-activated receptor gamma coactivator 1 beta (PERC), mRNA. /PROD=PGC-1-related estrogen receptor alphacoactivator /FL=gb:AF468496.1 gb:NM_133263.1
1553640_at	32.5	A	19.8	A	17.7	A	9.9	A	9.4	A	114.5	A	63.1	A	21.7	A	25.9	A	10.6	A	18.3	A	21.6	A	gb:NM_173683.1 /DB_XREF=gi:27734749 /TID=Hs2.353115.1 /CNT=8 /FEA=FLmRNA /TIER=FL /STK=1 /LL=286046 /UG_GENE=LOC286046 /UG=Hs.353115 /UG_TITLE=hypothetical protein LOC286046 /DEF=Homo sapiens hypothetical protein LOC286046 (LOC286046), mRNA. /FL=gb:BC024146.1 gb:NM_173683.1
1553641_a_at	16.1	A	5.5	A	21.7	A	19.6	A	89.2	A	14.5	A	42.7	A	108.3	A	17.3	A	40.4	A	41.1	A	14.5	A	gb:NM_052933.1 /DB_XREF=gi:16418410 /TID=Hs2.145223.1 /CNT=8 /FEA=FLmRNA /TIER=FL /STK=1 /LL=114960 /UG_GENE=TSGA13 /UG=Hs.145223 /UG_TITLE=testis specific, 13 /DEF=Homo sapiens testis specific, 13 (TSGA13), mRNA. /FL=gb:NM_052933.1 gb:AF294347.1
1553642_at	237.6	A	65.6	A	245.2	A	102.3	A	195.4	A	353.9	A	338.4	A	198.2	A	420.1	A	297	A	294.1	A	429	A	gb:NM_152571.1 /DB_XREF=gi:22749176 /TID=Hs2.212613.1 /CNT=7 /FEA=FLmRNA /TIER=FL /STK=1 /LL=158055 /UG_GENE=FLJ36779 /UG=Hs.212613 /UG_TITLE=hypothetical protein FLJ36779 /DEF=Homo sapiens hypothetical protein FLJ36779 (FLJ36779), mRNA. /FL=gb:NM_152571.1
1553644_at	130.3	A	204.6	P	83.8	A	106	A	50.2	A	192.6	M	278.6	A	206.9	P	208.8	P	188.9	P	154.8	P	246.8	P	gb:NM_152592.1 /DB_XREF=gi:22749218 /TID=Hs2.354645.1 /CNT=6 /FEA=FLmRNA /TIER=FL /STK=1 /LL=161176 /UG_GENE=C14orf49 /UG=Hs.354645 /UG_TITLE=chromosome 14 open reading frame 49 /DEF=Homo sapiens chromosome 14 open reading frame 49 (C14orf49), mRNA. /FL=gb:NM_152592.1
1553645_at	50.2	A	42.6	A	1.9	A	0.9	A	3.7	A	71.6	M	89.1	A	49.1	A	44.3	A	4.5	A	30.1	A	34.2	A	gb:NM_173648.1 /DB_XREF=gi:27735092 /TID=Hs2.99104.1 /CNT=9 /FEA=FLmRNA /TIER=FL /STK=1 /LL=285025 /UG_GENE=FLJ39502 /UG=Hs.99104 /UG_TITLE=hypothetical protein FLJ39502 /DEF=Homo sapiens hypothetical protein FLJ39502 (FLJ39502), mRNA. /FL=gb:NM_173648.1
1553646_at	69	A	88.6	P	90.2	P	75	A	183.2	P	129.7	P	48.8	A	23.5	A	147	P	150.1	P	50.8	P	111.1	P	gb:NM_144657.1 /DB_XREF=gi:21389530 /TID=Hs2.350885.1 /CNT=6 /FEA=FLmRNA /TIER=FL /STK=1 /LL=139324 /UG_GENE=FLJ30678 /UG=Hs.350885 /UG_TITLE=hypothetical protein FLJ30678 /DEF=Homo sapiens hypothetical protein FLJ30678 (FLJ30678), mRNA. /FL=gb:NM_144657.1
1553647_at	809.9	P	512.6	P	258.4	A	363.9	P	319.8	A	325.8	A	414.5	A	314	A	411.5	A	422.6	A	300.7	A	408.2	P	gb:NM_152342.1 /DB_XREF=gi:22748742 /TID=Hs2.208837.1 /CNT=6 /FEA=FLmRNA /TIER=FL /STK=1 /LL=124359 /UG_GENE=FLJ38866 /UG=Hs.208837 /UG_TITLE=hypothetical protein FLJ38866 /DEF=Homo sapiens hypothetical protein FLJ38866 (FLJ38866), mRNA. /FL=gb:NM_152342.1
1553651_at	30.7	A	25.1	A	42.5	A	58.3	P	108.3	A	78.2	A	98.9	A	62.5	A	85.1	P	40.6	A	36.4	A	40.7	A	gb:NM_173529.1 /DB_XREF=gi:27734948 /TID=Hs2.293654.1 /CNT=6 /FEA=FLmRNA /TIER=FL /STK=1 /LL=162681 /UG_GENE=MGC33382 /UG=Hs.293654 /UG_TITLE=hypothetical protein MGC33382 /DEF=Homo sapiens hypothetical protein MGC33382 (MGC33382), mRNA. /FL=gb:NM_173529.1 gb:BC036054.1
1553652_a_at	72.9	M	28.6	A	7.5	A	120.3	P	53.7	A	25.4	A	9.8	A	79.4	P	113.2	P	37.6	A	163.7	P	51.6	A	gb:NM_173529.1 /DB_XREF=gi:27734948 /TID=Hs2.293654.1 /CNT=6 /FEA=FLmRNA /TIER=FL /STK=1 /LL=162681 /UG_GENE=MGC33382 /UG=Hs.293654 /UG_TITLE=hypothetical protein MGC33382 /DEF=Homo sapiens hypothetical protein MGC33382 (MGC33382), mRNA. /FL=gb:NM_173529.1 gb:BC036054.1
1553654_at	259.3	P	142.7	P	81.9	P	96.1	P	43.6	A	157.1	P	34.4	A	52	P	111.4	P	97.5	P	67.9	P	86.7	P	gb:NM_153262.1 /DB_XREF=gi:23397557 /TID=Hs2.209605.1 /CNT=4 /FEA=FLmRNA /TIER=FL /STK=1 /LL=255928 /UG_GENE=FLJ34198 /UG=Hs.209605 /UG_TITLE=hypothetical protein FLJ34198 /DEF=Homo sapiens hypothetical protein FLJ34198 (FLJ34198), mRNA. /FL=gb:NM_153262.1
1553655_at	48.5	A	49.5	A	32.3	A	43.3	A	36.8	A	11.3	A	76.1	A	8.8	A	89.3	A	15.6	A	95.6	A	106.7	A	gb:NM_152623.1 /DB_XREF=gi:22749274 /TID=Hs2.363288.1 /CNT=4 /FEA=FLmRNA /TIER=FL /STK=1 /LL=166979 /UG_GENE=FLJ37927 /UG=Hs.363288 /UG_TITLE=hypothetical protein FLJ37927 /DEF=Homo sapiens hypothetical protein FLJ37927 (FLJ37927), mRNA. /FL=gb:NM_152623.1
1553656_at	180.1	A	143.5	A	286	A	31.9	A	28.8	A	176.3	A	350.2	A	219.3	A	186.5	A	88.9	A	170.8	A	161	A	gb:NM_058222.1 /DB_XREF=gi:17158034 /GEN=TECTB /TID=Hs2.348615.1 /CNT=4 /FEA=FLmRNA /TIER=FL /STK=1 /LL=6975 /UG=Hs.348615 /DEF=Homo sapiens tectorin beta (TECTB), mRNA. /PROD=tectorin beta /FL=gb:AF312827.1 gb:NM_058222.1
1553657_at	257.8	A	257.9	A	39.5	A	44.2	A	85.9	A	43.5	A	209.2	A	51.9	A	65.5	A	343.7	A	250.8	A	267.7	A	gb:NM_173615.1 /DB_XREF=gi:27734724 /TID=Hs2.375900.1 /CNT=3 /FEA=FLmRNA /TIER=FL /STK=1 /LL=283844 /UG_GENE=FLJ40941 /UG=Hs.375900 /UG_TITLE=hypothetical protein FLJ40941 /DEF=Homo sapiens hypothetical protein FLJ40941 (FLJ40941), mRNA. /FL=gb:NM_173615.1
1553658_at	113.4	A	154.4	P	75.1	A	64.4	A	97.4	A	109.4	A	158.6	A	116.1	P	153.6	A	172.6	P	63.7	A	65.4	A	gb:NM_152508.1 /DB_XREF=gi:22749062 /TID=Hs2.192691.1 /CNT=3 /FEA=FLmRNA /TIER=FL /STK=1 /LL=150197 /UG_GENE=FLJ32575 /UG=Hs.192691 /UG_TITLE=hypothetical protein FLJ32575 /DEF=Homo sapiens hypothetical protein FLJ32575 (FLJ32575), mRNA. /FL=gb:NM_152508.1
1553660_at	51.9	A	77.5	A	69.9	A	14.8	A	64.8	A	82.8	A	241.8	A	5.5	A	136.3	A	48.6	A	18.8	A	14.4	A	gb:NM_148959.1 /DB_XREF=gi:22507373 /GEN=HUS1b /TID=Hs2.165831.1 /CNT=3 /FEA=FLmRNA /TIER=FL /STK=1 /LL=135458 /UG=Hs.165831 /DEF=Homo sapiens similar to HUS1 checkpoint homolog (S. pombe); HUS1 (S. pombe) checkpoint homolog (HUS1b), mRNA. /PROD=similar to HUS1 checkpoint homolog (S. pombe);HUS1 (S. pombe) checkpoint homolog /FL=gb:AF508547.1 gb:NM_148959.1
1553661_a_at	164.7	A	59.6	A	74.1	A	105.1	A	97.4	A	28	A	88	A	92.5	A	78.2	A	154	A	184.1	A	22.7	A	gb:NM_148959.1 /DB_XREF=gi:22507373 /GEN=HUS1b /TID=Hs2.165831.1 /CNT=3 /FEA=FLmRNA /TIER=FL /STK=1 /LL=135458 /UG=Hs.165831 /DEF=Homo sapiens similar to HUS1 checkpoint homolog (S. pombe); HUS1 (S. pombe) checkpoint homolog (HUS1b), mRNA. /PROD=similar to HUS1 checkpoint homolog (S. pombe);HUS1 (S. pombe) checkpoint homolog /FL=gb:AF508547.1 gb:NM_148959.1
1553663_a_at	62.1	A	54.9	A	29.4	A	19.7	A	37.9	A	34.2	A	85.5	A	18.6	A	32.8	A	30.8	A	28.9	A	56.6	A	gb:NM_148896.1 /DB_XREF=gi:22507402 /GEN=NPB /TID=Hs2.345721.1 /CNT=3 /FEA=FLmRNA /TIER=FL /STK=1 /LL=256933 /UG=Hs.345721 /DEF=Homo sapiens preproneuropeptide B (NPB), mRNA. /PROD=preproneuropeptide B /FL=gb:AB085942.1 gb:NM_148896.1
1553666_at	105.8	P	79.9	P	89.8	A	7.2	A	8	A	79.4	A	77.1	A	78.7	P	84.2	A	78.2	A	102.8	M	64.6	P	gb:NM_080654.1 /DB_XREF=gi:18087816 /TID=Hs2.256150.1 /CNT=43 /FEA=FLmRNA /TIER=FL /STK=0 /LL=91057 /UG_GENE=NY-REN-41 /UG=Hs.256150 /UG_TITLE=NY-REN-41 antigen /DEF=Homo sapiens NY-REN-41 antigen (NY-REN-41), mRNA. /FL=gb:NM_080654.1 gb:BC008496.1
1553668_at	209.9	P	312.8	P	176.1	P	165.5	A	265.7	P	160.5	A	191.8	A	141.3	P	360.9	P	191.5	M	254.3	P	261.9	P	gb:NM_032773.1 /DB_XREF=gi:14249427 /TID=Hs2.289038.1 /CNT=38 /FEA=FLmRNA /TIER=FL /STK=0 /LL=84859 /UG_GENE=MGC4126 /UG=Hs.289038 /UG_TITLE=hypothetical protein MGC4126 /DEF=Homo sapiens hypothetical protein MGC4126 (MGC4126), mRNA. /FL=gb:NM_032773.1 gb:BC007504.1
1553670_at	142.2	A	63.7	A	66.7	A	62.6	A	140.4	P	168.5	A	168.4	A	61.5	A	142.6	A	88.4	A	1042.6	P	96.3	A	gb:NM_033547.1 /DB_XREF=gi:15809017 /TID=Hs2.14632.1 /CNT=36 /FEA=FLmRNA /TIER=FL /STK=0 /LL=92105 /UG_GENE=MGC16733 /UG=Hs.14632 /UG_TITLE=hypothetical gene MGC16733 similar to CG12113 /DEF=Homo sapiens hypothetical gene MGC16733 similar to CG12113 (MGC16733), mRNA. /FL=gb:NM_033547.1 gb:BC009995.1
1553672_at	132.5	A	172.2	P	74.3	A	276.8	P	298.2	P	187.7	P	82.5	A	112.5	P	360.1	P	288.2	P	102.7	A	326.5	P	gb:NM_145240.1 /DB_XREF=gi:21687113 /TID=Hs2.32399.1 /CNT=33 /FEA=FLmRNA /TIER=FL /STK=0 /LL=113521 /UG_GENE=LOC113521 /UG=Hs.32399 /UG_TITLE=similar to avenaII /DEF=Homo sapiens similar to avenaII (LOC113521), mRNA. /FL=gb:NM_145240.1 gb:BC010414.1
1553673_at	86.7	A	105.8	A	72.4	A	93.8	A	65.2	A	61	A	43.3	A	84.4	A	83.3	A	47.8	A	135.2	A	49.8	A	gb:NM_080836.1 /DB_XREF=gi:20128767 /TID=Hs2.100057.1 /CNT=31 /FEA=FLmRNA /TIER=FL /STK=0 /LL=140901 /UG_GENE=STK35 /UG=Hs.100057 /UG_TITLE=serinethreonine kinase 35 /DEF=Homo sapiens serinethreonine kinase 35 (STK35), mRNA. /FL=gb:NM_080836.1 gb:AF195026.1
1553674_at	82.4	A	149.7	P	48.4	A	44.9	P	69.5	P	29.3	A	45.8	A	40.7	P	52.9	M	65.9	P	157.1	P	118	P	gb:NM_145258.1 /DB_XREF=gi:21687083 /TID=Hs2.34596.1 /CNT=31 /FEA=FLmRNA /TIER=FL /STK=0 /LL=127255 /UG_GENE=LOC127255 /UG=Hs.34596 /UG_TITLE=similar to hypothetical protein FLJ20156 /DEF=Homo sapiens similar to hypothetical protein FLJ20156 (LOC127255), mRNA. /FL=gb:NM_145258.1 gb:BC020778.1
1553675_at	19.7	A	6.4	A	61.3	A	4.7	A	42.2	A	16.2	A	159.9	A	93.4	A	8.4	A	56.8	A	102.5	A	16.6	A	gb:NM_138343.1 /DB_XREF=gi:19923890 /TID=Hs2.53447.1 /CNT=33 /FEA=FLmRNA /TIER=FL /STK=0 /LL=89953 /UG_GENE=LOC89953 /UG=Hs.53447 /UG_TITLE=hypothetical protein BC012357 /DEF=Homo sapiens hypothetical protein BC012357 (LOC89953), mRNA. /FL=gb:BC012357.1 gb:NM_138343.1
1553677_a_at	724	P	785.6	P	454.6	P	4668.2	P	1339.8	P	2212.1	P	454.9	P	1098.5	P	1855.7	P	872.7	P	507.6	P	962.2	P	gb:NM_152902.1 /DB_XREF=gi:23097249 /TID=Hs2.137576.1 /CNT=34 /FEA=FLmRNA /TIER=FL /STK=0 /LL=261726 /UG_GENE=MGC3794 /UG=Hs.137576 /UG_TITLE=similar to CG9578 gene product /DEF=Homo sapiens similar to CG9578 gene product (MGC3794), mRNA. /FL=gb:NM_152902.1
1553678_a_at	7259.3	P	8663.1	P	5847	P	14625.1	P	5443.8	P	7482.3	P	5747.2	P	4789.2	P	10026.8	P	7928.2	P	4915	P	16470.1	P	gb:NM_133376.1 /DB_XREF=gi:19743822 /GEN=ITGB1 /TID=Hs2.287797.6 /CNT=33 /FEA=FLmRNA /TIER=FL /STK=0 /LL=3688 /UG=Hs.287797 /DEF=Homo sapiens integrin, beta 1 (fibronectin receptor, beta polypeptide, antigen CD29 includes MDF2, MSK12) (ITGB1), transcript variant 1E, mRNA. /PROD=integrin beta 1 isoform 1A precursor /FL=gb:NM_133376.1
1553679_s_at	277.1	P	358.6	P	168.3	P	550.5	P	403.1	P	292.2	P	403.8	P	301.2	P	488.9	P	355.8	P	369.3	P	288.8	P	gb:NM_173517.1 /DB_XREF=gi:27735152 /TID=Hs2.422727.1 /CNT=34 /FEA=FLmRNA /TIER=FL /STK=0 /LL=154807 /UG_GENE=LOC154807 /UG=Hs.422727 /UG_TITLE=hypothetical protein LOC154807 /DEF=Homo sapiens hypothetical protein LOC154807 (LOC154807), mRNA. /FL=gb:BC027734.1 gb:NM_173517.1
1553681_a_at	255.8	P	223.5	A	169.3	P	120.6	P	197.9	A	202.2	P	444.3	P	137.6	M	187.8	M	256.9	M	184.6	A	275.1	P	gb:NM_005041.1 /DB_XREF=gi:4826941 /GEN=PRF1 /TID=Hs2.2200.1 /CNT=30 /FEA=FLmRNA /TIER=FL /STK=0 /LL=5551 /UG=Hs.2200 /DEF=Homo sapiens perforin 1 (preforming protein) (PRF1), mRNA. /PROD=perforin 1 (preforming protein) /FL=gb:M28393.1 gb:NM_005041.1
1553682_at	10.2	A	14.2	A	79.6	M	65.3	P	65.3	A	57.9	A	52.8	A	60.8	P	13.6	A	12.3	A	73.1	A	67.8	A	gb:NM_152441.1 /DB_XREF=gi:22748930 /TID=Hs2.367956.1 /CNT=26 /FEA=FLmRNA /TIER=FL /STK=0 /LL=144699 /UG_GENE=MGC40195 /UG=Hs.367956 /UG_TITLE=hypothetical protein MGC40195 /DEF=Homo sapiens hypothetical protein MGC40195 (MGC40195), mRNA. /FL=gb:BC028132.1 gb:NM_152441.1
1553683_s_at	68.6	A	24.1	A	137.9	P	54.1	A	195.7	P	18.2	A	115.3	A	35.7	A	110.8	A	74.6	A	136.8	A	136.7	A	gb:NM_152441.1 /DB_XREF=gi:22748930 /TID=Hs2.367956.1 /CNT=26 /FEA=FLmRNA /TIER=FL /STK=0 /LL=144699 /UG_GENE=MGC40195 /UG=Hs.367956 /UG_TITLE=hypothetical protein MGC40195 /DEF=Homo sapiens hypothetical protein MGC40195 (MGC40195), mRNA. /FL=gb:BC028132.1 gb:NM_152441.1
1553684_at	135.6	P	92.6	P	75.4	P	86.4	P	180.4	P	40.3	A	235.6	P	67.9	P	51.9	A	51.3	A	77.4	P	15.2	A	gb:NM_173672.1 /DB_XREF=gi:27735044 /TID=Hs2.32234.1 /CNT=26 /FEA=FLmRNA /TIER=FL /STK=0 /LL=285755 /UG_GENE=MGC41939 /UG=Hs.32234 /UG_TITLE=hypothetical protein MGC41939 /DEF=Homo sapiens hypothetical protein MGC41939 (MGC41939), mRNA. /FL=gb:BC038716.1 gb:NM_173672.1
1553685_s_at	332.5	P	412.2	P	245.8	P	324.6	P	230.3	P	305.9	P	263.6	M	105	P	180.1	P	269.6	P	289.9	P	132.4	P	gb:NM_138473.1 /DB_XREF=gi:19924004 /TID=Hs2.348374.1 /CNT=35 /FEA=FLmRNA /TIER=FL /STK=0 /LL=144467 /UG_GENE=LOC144467 /UG=Hs.348374 /UG_TITLE=hypothetical protein BC012008 /DEF=Homo sapiens hypothetical protein BC012008 (LOC144467), mRNA. /FL=gb:NM_138473.1 gb:BC012008.1
1553686_at	68	A	62.9	A	135.7	A	181.1	P	95.1	M	101.5	A	22.7	A	99	P	33.8	A	118.1	P	175.1	P	96.8	A	gb:NM_145055.1 /DB_XREF=gi:21450813 /TID=Hs2.33862.1 /CNT=25 /FEA=FLmRNA /TIER=FL /STK=0 /LL=147339 /UG_GENE=MGC12909 /UG=Hs.33862 /UG_TITLE=hypothetical protein MGC12909 /DEF=Homo sapiens hypothetical protein MGC12909 (MGC12909), mRNA. /FL=gb:BC016149.1 gb:NM_145055.1
1553688_at	137.2	A	116.1	A	162.4	A	306.1	A	64.4	A	138.5	A	192.3	A	124.1	A	108.2	A	25.7	A	34.5	A	133.4	A	gb:NM_152396.1 /DB_XREF=gi:22748844 /TID=Hs2.149487.1 /CNT=17 /FEA=FLmRNA /TIER=FL /STK=0 /LL=131965 /UG_GENE=MGC24132 /UG=Hs.149487 /UG_TITLE=hypothetical protein MGC24132 /DEF=Homo sapiens hypothetical protein MGC24132 (MGC24132), mRNA. /FL=gb:NM_152396.1 gb:BC022400.1
1553689_s_at	290.8	P	329.6	P	479	P	646.7	P	446.2	P	774.1	P	440.5	P	404.4	P	299.4	P	396.3	P	485.4	P	425.5	P	gb:NM_152396.1 /DB_XREF=gi:22748844 /TID=Hs2.149487.1 /CNT=17 /FEA=FLmRNA /TIER=FL /STK=0 /LL=131965 /UG_GENE=MGC24132 /UG=Hs.149487 /UG_TITLE=hypothetical protein MGC24132 /DEF=Homo sapiens hypothetical protein MGC24132 (MGC24132), mRNA. /FL=gb:NM_152396.1 gb:BC022400.1
1553690_at	182.8	P	292	P	218.9	P	108	P	121.4	P	113.4	P	191.5	P	275	P	234.3	P	278	P	194.5	P	332.5	P	gb:NM_138484.1 /DB_XREF=gi:24308447 /TID=Hs2.105153.1 /CNT=14 /FEA=FLmRNA /TIER=FL /STK=0 /LL=151648 /UG_GENE=LOC151648 /UG=Hs.105153 /UG_TITLE=hypothetical protein BC001339 /DEF=Homo sapiens hypothetical protein BC001339 (LOC151648), mRNA. /FL=gb:BC017867.1 gb:NM_138484.1
1553691_at	74	A	95.3	M	151.5	P	538	P	208.2	P	333.9	P	295.4	P	121.2	P	184.1	P	143.3	P	91.5	P	75.1	P	gb:NM_152490.1 /DB_XREF=gi:22749020 /TID=Hs2.97509.1 /CNT=23 /FEA=FLmRNA /TIER=FL /STK=0 /LL=148789 /UG_GENE=MGC39558 /UG=Hs.97509 /UG_TITLE=hypothetical protein MGC39558 /DEF=Homo sapiens hypothetical protein MGC39558 (MGC39558), mRNA. /FL=gb:BC029564.1 gb:NM_152490.1
1553693_s_at	121.2	P	52.6	A	262.3	P	136	P	72.7	A	192.9	M	144.7	A	125.4	P	58.3	A	64.3	A	129	P	75.5	P	gb:NM_032783.1 /DB_XREF=gi:14249445 /TID=Hs2.71616.1 /CNT=22 /FEA=FLmRNA /TIER=FL /STK=0 /LL=84869 /UG_GENE=FLJ14431 /UG=Hs.71616 /UG_TITLE=hypothetical protein FLJ14431 /DEF=Homo sapiens hypothetical protein FLJ14431 (FLJ14431), mRNA. /FL=gb:NM_032783.1
1553694_a_at	973.2	P	1318.4	P	1146.8	P	1051.9	P	1195.2	P	1220.3	P	1820.8	P	538.5	P	924.6	P	976.1	P	947.2	P	470.6	P	gb:NM_002645.1 /DB_XREF=gi:4505798 /GEN=PIK3C2A /TID=Hs2.249235.1 /CNT=39 /FEA=FLmRNA /TIER=FL /STK=0 /LL=5286 /UG=Hs.249235 /DEF=Homo sapiens phosphoinositide-3-kinase, class 2, alpha polypeptide (PIK3C2A), mRNA. /PROD=phosphoinositide-3-kinase, class 2, alphapolypeptide /FL=gb:NM_002645.1
1553695_a_at	445.4	A	384.9	A	438.1	P	297	A	344.4	A	343.9	A	572.7	A	160.7	A	459.7	A	203.5	A	265.6	A	461.5	P	gb:NM_170722.1 /DB_XREF=gi:25777609 /TID=Hs2.31097.2 /CNT=33 /FEA=FLmRNA /TIER=FL /STK=0 /LL=79671 /UG_GENE=FLJ21478 /UG=Hs.31097 /UG_TITLE=hypothetical protein FLJ21478 /DEF=Homo sapiens hypothetical protein FLJ21478 (FLJ21478), transcript variant 2, mRNA. /FL=gb:NM_170722.1 gb:BC013199.1
1553696_s_at	172.6	A	133.5	A	3.5	A	243.5	P	215.3	P	71.4	A	200.3	A	48.7	A	99.4	A	107.3	A	192.7	P	5.4	A	gb:NM_152484.1 /DB_XREF=gi:23097316 /TID=Hs2.149692.1 /CNT=26 /FEA=FLmRNA /TIER=FL /STK=0 /LL=148266 /UG_GENE=FLJ32053 /UG=Hs.149692 /UG_TITLE=hypothetical protein FLJ32053 /DEF=Homo sapiens hypothetical protein FLJ32053 (FLJ32053), mRNA. /FL=gb:NM_152484.1
1553697_at	53.7	A	108.6	P	52.1	P	169.4	P	43	M	109.6	P	74.2	P	31.1	A	116.2	M	165	P	64.5	P	130.3	P	gb:NM_145257.1 /DB_XREF=gi:21687081 /TID=Hs2.29497.1 /CNT=16 /FEA=FLmRNA /TIER=FL /STK=0 /LL=126731 /UG_GENE=LOC126731 /UG=Hs.29497 /UG_TITLE=LOC126731 /DEF=Homo sapiens LOC126731 (LOC126731), mRNA. /FL=gb:NM_145257.1 gb:BC015419.1
1553698_a_at	123.2	A	201.5	P	150.1	P	323.6	P	146.3	A	179.3	P	81.4	A	111.3	P	141.1	P	292.3	P	104.9	P	131.9	P	gb:NM_145257.1 /DB_XREF=gi:21687081 /TID=Hs2.29497.1 /CNT=16 /FEA=FLmRNA /TIER=FL /STK=0 /LL=126731 /UG_GENE=LOC126731 /UG=Hs.29497 /UG_TITLE=LOC126731 /DEF=Homo sapiens LOC126731 (LOC126731), mRNA. /FL=gb:NM_145257.1 gb:BC015419.1
1553701_a_at	35.5	A	38.1	A	29.9	A	23	A	32.2	A	34.5	A	76.1	A	25.2	A	27	A	38.1	A	29.6	A	20.5	A	gb:NM_152511.1 /DB_XREF=gi:22749060 /TID=Hs2.128782.1 /CNT=14 /FEA=FLmRNA /TIER=FL /STK=0 /LL=150290 /UG_GENE=DUSP18 /UG=Hs.128782 /UG_TITLE=dual specificity phosphatase 18 /DEF=Homo sapiens dual specificity phosphatase 18 (DUSP18), mRNA. /FL=gb:BC030987.1 gb:NM_152511.1
1553702_at	243.6	P	353.8	P	248.9	P	187.6	P	140.9	A	448.5	P	525.1	A	132.6	P	126.9	A	246.6	P	416.1	P	130.1	P	gb:NM_138366.1 /DB_XREF=gi:24308403 /TID=Hs2.334758.1 /CNT=12 /FEA=FLmRNA /TIER=FL /STK=0 /LL=90874 /UG_GENE=LOC90874 /UG=Hs.334758 /UG_TITLE=hypothetical protein BC007260 /DEF=Homo sapiens hypothetical protein BC007260 (LOC90874), mRNA. /FL=gb:BC033126.1 gb:NM_138366.1
1553703_at	501.2	P	571.2	P	644.9	P	834.5	P	1282.9	P	1420.3	P	1176.1	P	1182.6	P	889.3	P	751.2	P	1054.2	P	1111.4	P	gb:NM_153358.1 /DB_XREF=gi:23503286 /TID=Hs2.346875.1 /CNT=24 /FEA=FLmRNA /TIER=FL /STK=0 /LL=163049 /UG_GENE=FLJ90396 /UG=Hs.346875 /UG_TITLE=hypothetical protein FLJ90396 /DEF=Homo sapiens hypothetical protein FLJ90396 (FLJ90396), mRNA. /FL=gb:NM_153358.1
1553704_x_at	408.2	P	409.1	P	395.1	P	684.3	P	958.8	P	953.2	P	796.1	P	707	P	527.2	P	453.3	P	621.5	P	746.4	P	gb:NM_153358.1 /DB_XREF=gi:23503286 /TID=Hs2.346875.1 /CNT=24 /FEA=FLmRNA /TIER=FL /STK=0 /LL=163049 /UG_GENE=FLJ90396 /UG=Hs.346875 /UG_TITLE=hypothetical protein FLJ90396 /DEF=Homo sapiens hypothetical protein FLJ90396 (FLJ90396), mRNA. /FL=gb:NM_153358.1
1553705_a_at	28.8	A	38.9	A	219.5	P	74.4	A	191.6	M	226.9	P	703.4	P	42.3	A	215	P	329.2	P	102.5	A	308.9	P	gb:NM_000740.1 /DB_XREF=gi:4502818 /GEN=CHRM3 /TID=Hs2.7138.1 /CNT=20 /FEA=FLmRNA /TIER=FL /STK=0 /LL=1131 /UG=Hs.7138 /DEF=Homo sapiens cholinergic receptor, muscarinic 3 (CHRM3), mRNA. /PROD=cholinergic receptor, muscarinic 3 /FL=gb:AF498917.1 gb:NM_000740.1
1553706_at	19.1	A	22	A	8.9	A	4.8	A	19.5	A	161.3	A	137.4	A	36.7	A	168.5	A	6	A	21.5	A	94.7	A	gb:NM_153692.1 /DB_XREF=gi:24308540 /TID=Hs2.322452.1 /CNT=16 /FEA=FLmRNA /TIER=FL /STK=0 /LL=203100 /UG_GENE=FLJ90724 /UG=Hs.322452 /UG_TITLE=hypothetical protein FLJ90724 /DEF=Homo sapiens hypothetical protein FLJ90724 (FLJ90724), mRNA. /FL=gb:NM_153692.1
1553708_at	57.2	A	106.5	A	23.7	A	91.5	P	320	P	79.3	A	152.3	P	42	A	109.4	P	75.8	A	138.7	P	150.7	P	gb:NM_032761.1 /DB_XREF=gi:14249403 /TID=Hs2.334508.1 /CNT=11 /FEA=FLmRNA /TIER=FL /STK=0 /LL=84847 /UG_GENE=MGC16075 /UG=Hs.334508 /UG_TITLE=hypothetical protein MGC16075 /DEF=Homo sapiens hypothetical protein MGC16075 (MGC16075), mRNA. /FL=gb:BC007354.1 gb:NM_032761.1
1553709_a_at	990	P	1372.8	P	1963.7	P	1517.9	P	2249.4	P	1400.9	P	1994.1	P	1739.4	P	1376	P	2532.2	P	2065.9	P	1303.6	P	gb:NM_032284.1 /DB_XREF=gi:14149988 /TID=Hs2.5301.2 /CNT=11 /FEA=FLmRNA /TIER=FL /STK=0 /LL=84950 /UG_GENE=FLJ14936 /UG=Hs.5301 /UG_TITLE=hypothetical protein FLJ14936 /DEF=Homo sapiens hypothetical protein FLJ14936 (FLJ14936), mRNA. /FL=gb:NM_032284.1 gb:BC000777.1
1553710_at	10.4	A	8.6	A	7.7	A	2.2	A	48.5	A	14.2	A	74.9	A	5.2	A	5.9	A	21	A	8	A	5.1	A	gb:NM_153027.1 /DB_XREF=gi:23308540 /TID=Hs2.178648.1 /CNT=22 /FEA=FLmRNA /TIER=FL /STK=0 /LL=152756 /UG_GENE=FLJ31659 /UG=Hs.178648 /UG_TITLE=hypothetical protein FLJ31659 /DEF=Homo sapiens hypothetical protein FLJ31659 (FLJ31659), mRNA. /FL=gb:BC022381.1 gb:NM_153027.1
1553711_a_at	102.8	A	52.5	A	86.6	P	75.7	P	131.5	P	85.5	P	131.9	A	39.8	A	43.7	A	19.2	A	68.4	P	49.1	A	gb:NM_153027.1 /DB_XREF=gi:23308540 /TID=Hs2.178648.1 /CNT=22 /FEA=FLmRNA /TIER=FL /STK=0 /LL=152756 /UG_GENE=FLJ31659 /UG=Hs.178648 /UG_TITLE=hypothetical protein FLJ31659 /DEF=Homo sapiens hypothetical protein FLJ31659 (FLJ31659), mRNA. /FL=gb:BC022381.1 gb:NM_153027.1
1553713_a_at	333.3	A	295.8	P	278.9	A	94.9	A	196.3	A	49.8	A	144.5	A	875.1	P	144.9	A	391.6	A	319.9	P	47.2	A	gb:NM_144593.1 /DB_XREF=gi:21389384 /TID=Hs2.159013.1 /CNT=16 /FEA=FLmRNA /TIER=FL /STK=0 /LL=121268 /UG_GENE=MGC34869 /UG=Hs.159013 /UG_TITLE=hypothetical protein MGC34869 /DEF=Homo sapiens hypothetical protein MGC34869 (MGC34869), mRNA. /FL=gb:BC027482.1 gb:NM_144593.1
1553715_s_at	1442.6	P	1138.1	P	1229.6	P	2042.2	P	1266.5	M	1804.8	P	887.3	A	1981.9	P	1064.1	A	603.1	A	1501.5	P	951.9	P	gb:NM_032371.1 /DB_XREF=gi:14150192 /TID=Hs2.417710.2 /CNT=10 /FEA=FLmRNA /TIER=FL /STK=0 /LL=84331 /UG_GENE=MGC15416 /UG=Hs.417710 /UG_TITLE=hypothetical protein MGC15416 /DEF=Homo sapiens hypothetical protein MGC15416 (MGC15416), mRNA. /FL=gb:BC007346.1 gb:NM_032371.1
1553717_at	112.5	A	292.5	A	146.7	A	17.7	A	30.9	A	105.7	A	116.8	A	30.1	A	284.7	A	200.2	A	66.8	A	109.3	A	gb:NM_153033.1 /DB_XREF=gi:23308550 /TID=Hs2.290825.1 /CNT=24 /FEA=FLmRNA /TIER=FL /STK=0 /LL=154881 /UG_GENE=FLJ32069 /UG=Hs.290825 /UG_TITLE=hypothetical protein FLJ32069 /DEF=Homo sapiens hypothetical protein FLJ32069 (FLJ32069), mRNA. /FL=gb:NM_153033.1
1553718_at	761.6	P	1833.9	P	684.8	P	876.8	P	946	P	1214.5	P	1476.3	P	535.2	P	641.6	P	964.6	P	1232	P	834.1	P	gb:NM_152909.1 /DB_XREF=gi:23097267 /TID=Hs2.374782.1 /CNT=21 /FEA=FLmRNA /TIER=FL /STK=0 /LL=147694 /UG_GENE=FLJ32932 /UG=Hs.374782 /UG_TITLE=hypothetical protein FLJ32932 /DEF=Homo sapiens hypothetical protein FLJ32932 (FLJ32932), mRNA. /FL=gb:BC030788.1 gb:NM_152909.1
1553719_s_at	241.3	P	209.3	P	176.2	P	296.8	P	144.6	P	325.3	P	176.3	P	167.5	P	173.2	P	228.7	P	165.3	P	132.5	P	gb:NM_152909.1 /DB_XREF=gi:23097267 /TID=Hs2.374782.1 /CNT=21 /FEA=FLmRNA /TIER=FL /STK=0 /LL=147694 /UG_GENE=FLJ32932 /UG=Hs.374782 /UG_TITLE=hypothetical protein FLJ32932 /DEF=Homo sapiens hypothetical protein FLJ32932 (FLJ32932), mRNA. /FL=gb:BC030788.1 gb:NM_152909.1
1553720_a_at	84.8	A	64.7	A	10.4	A	29.3	A	18.3	A	32.6	A	39	A	12.9	A	45.1	A	44.3	A	46.7	A	41.7	A	gb:NM_152704.1 /DB_XREF=gi:22749404 /TID=Hs2.100343.1 /CNT=18 /FEA=FLmRNA /TIER=FL /STK=0 /LL=219287 /UG_GENE=FLJ25477 /UG=Hs.100343 /UG_TITLE=hypothetical protein FLJ25477 /DEF=Homo sapiens hypothetical protein FLJ25477 (FLJ25477), mRNA. /FL=gb:NM_152704.1
1553721_at	9.8	A	49.7	A	15.2	A	14.3	A	41.7	A	20.6	A	15.6	A	15.7	A	17.3	A	7	A	3	A	50.3	A	gb:NM_173557.1 /DB_XREF=gi:27734872 /TID=Hs2.243623.1 /CNT=16 /FEA=FLmRNA /TIER=FL /STK=0 /LL=220441 /UG_GENE=FLJ39176 /UG=Hs.243623 /UG_TITLE=hypothetical protein FLJ39176 /DEF=Homo sapiens hypothetical protein FLJ39176 (FLJ39176), mRNA. /FL=gb:NM_173557.1
1553722_s_at	3.3	A	40.5	A	20.1	A	6.2	A	53.4	A	9.8	A	243.2	A	5.7	A	32.1	A	5.1	A	25.7	A	26.3	A	gb:NM_173557.1 /DB_XREF=gi:27734872 /TID=Hs2.243623.1 /CNT=16 /FEA=FLmRNA /TIER=FL /STK=0 /LL=220441 /UG_GENE=FLJ39176 /UG=Hs.243623 /UG_TITLE=hypothetical protein FLJ39176 /DEF=Homo sapiens hypothetical protein FLJ39176 (FLJ39176), mRNA. /FL=gb:NM_173557.1
1553723_at	9.6	A	33.7	A	7	A	15.6	A	76.2	A	159.3	A	50.4	A	93.2	A	31.3	A	56	A	30.2	A	35.3	A	gb:NM_170776.1 /DB_XREF=gi:25092692 /GEN=GPR-97 /TID=Hs2.400682.1 /CNT=16 /FEA=FLmRNA /TIER=FL /STK=0 /LL=222487 /UG=Hs.400682 /DEF=Homo sapiens similar to G protein-coupled receptor 56; EGF-TM7-like (GPR-97), mRNA. /PROD=similar to G protein-coupled receptor 56;EGF-TM7-like /FL=gb:AY140959.1 gb:NM_170776.1
1553725_s_at	472.4	P	885.9	P	727.6	P	734.4	P	749.6	P	829.1	P	829.3	P	796.5	P	537.9	P	767.7	P	1054.9	P	375.1	P	gb:NM_016620.1 /DB_XREF=gi:7705301 /TID=Hs2.334470.1 /CNT=14 /FEA=FLmRNA /TIER=FL /STK=0 /LL=51570 /UG_GENE=BM-005 /UG=Hs.334470 /UG_TITLE=hypothetical protein BM-005 /DEF=Homo sapiens hypothetical protein BM-005 (BM-005), mRNA. /FL=gb:NM_016620.1
1553726_s_at	80.5	P	38	A	59.2	P	32.9	A	45	M	41.2	A	51.4	A	42.1	P	47.6	A	59.9	A	20.6	A	33.4	M	gb:NM_152730.1 /DB_XREF=gi:22749446 /TID=Hs2.156494.1 /CNT=14 /FEA=FLmRNA /TIER=FL /STK=0 /LL=221322 /UG_GENE=FLJ30899 /UG=Hs.156494 /UG_TITLE=hypothetical protein FLJ30899 /DEF=Homo sapiens hypothetical protein FLJ30899 (FLJ30899), mRNA. /FL=gb:NM_152730.1
1553727_at	37.4	A	32.3	A	55.8	A	27.5	A	58.6	A	17	A	58.4	A	46.9	A	37.5	A	27.6	A	32.2	A	27.1	A	gb:NM_173593.1 /DB_XREF=gi:27734782 /TID=Hs2.416460.1 /CNT=11 /FEA=FLmRNA /TIER=FL /STK=0 /LL=283358 /UG_GENE=FLJ40362 /UG=Hs.416460 /UG_TITLE=hypothetical protein FLJ40362 /DEF=Homo sapiens hypothetical protein FLJ40362 (FLJ40362), mRNA. /FL=gb:NM_173593.1
1553728_at	209.4	A	216.3	A	738.3	A	171.8	A	228	A	764.8	A	281.1	A	222.5	A	213.1	A	221.2	A	262	A	198	A	gb:NM_152759.1 /DB_XREF=gi:22749486 /TID=Hs2.374856.1 /CNT=11 /FEA=FLmRNA /TIER=FL /STK=0 /LL=254050 /UG_GENE=MGC35140 /UG=Hs.374856 /UG_TITLE=hypothetical protein MGC35140 /DEF=Homo sapiens hypothetical protein MGC35140 (MGC35140), mRNA. /FL=gb:BC029245.1 gb:NM_152759.1
1553729_s_at	58.9	A	70.5	A	34.9	A	25.4	A	9.5	A	188.6	P	42.4	A	47.4	A	40.7	A	77	A	86.8	A	74.8	A	gb:NM_152759.1 /DB_XREF=gi:22749486 /TID=Hs2.374856.1 /CNT=11 /FEA=FLmRNA /TIER=FL /STK=0 /LL=254050 /UG_GENE=MGC35140 /UG=Hs.374856 /UG_TITLE=hypothetical protein MGC35140 /DEF=Homo sapiens hypothetical protein MGC35140 (MGC35140), mRNA. /FL=gb:BC029245.1 gb:NM_152759.1
1553730_x_at	66.1	A	149.4	A	48.3	A	137.4	A	400.1	A	420	A	160.9	A	78.9	A	161.1	A	99.2	A	61.3	A	173.1	A	gb:NM_152759.1 /DB_XREF=gi:22749486 /TID=Hs2.374856.1 /CNT=11 /FEA=FLmRNA /TIER=FL /STK=0 /LL=254050 /UG_GENE=MGC35140 /UG=Hs.374856 /UG_TITLE=hypothetical protein MGC35140 /DEF=Homo sapiens hypothetical protein MGC35140 (MGC35140), mRNA. /FL=gb:BC029245.1 gb:NM_152759.1
1553732_s_at	259.4	A	306	A	215.3	A	181.2	A	352.4	A	92.9	A	238.1	A	265.1	A	418.7	A	372.7	A	263.2	A	363	A	gb:NM_032816.1 /DB_XREF=gi:14249509 /TID=Hs2.317590.1 /CNT=18 /FEA=FLmRNA /TIER=FL /STK=0 /LL=84902 /UG_GENE=FLJ14640 /UG=Hs.317590 /UG_TITLE=hypothetical protein FLJ14640 /DEF=Homo sapiens hypothetical protein FLJ14640 (FLJ14640), mRNA. /FL=gb:NM_032816.1
1553734_at	6.4	A	34.7	A	43.4	A	8.8	A	9.4	A	45.8	A	89.2	A	7.1	A	11.3	A	37.3	A	31.2	A	21	A	gb:NM_152327.1 /DB_XREF=gi:22748714 /TID=Hs2.143883.1 /CNT=15 /FEA=FLmRNA /TIER=FL /STK=0 /LL=122481 /UG_GENE=AK7 /UG=Hs.143883 /UG_TITLE=adenylate kinase 7 /DEF=Homo sapiens adenylate kinase 7 (AK7), mRNA. /FL=gb:BC035256.1 gb:NM_152327.1
1553736_at	8.9	A	53.1	A	64.8	A	39.4	A	20	A	3.3	A	69.3	A	4.1	A	16.9	A	7.6	A	57.9	A	18.9	A	gb:NM_144982.1 /DB_XREF=gi:21450672 /TID=Hs2.245383.1 /CNT=11 /FEA=FLmRNA /TIER=FL /STK=0 /LL=196441 /UG_GENE=MGC23401 /UG=Hs.245383 /UG_TITLE=hypothetical protein MGC23401 /DEF=Homo sapiens hypothetical protein MGC23401 (MGC23401), mRNA. /FL=gb:NM_144982.1 gb:BC015679.1
1553739_at	2.9	A	38.9	A	22.9	A	2.7	A	38	A	2.5	A	11.9	A	27.7	A	15.6	A	3.4	A	55.2	A	3.7	A	gb:NM_001570.2 /DB_XREF=gi:21614547 /GEN=IRAK2 /TID=Hs2.249175.1 /CNT=10 /FEA=FLmRNA /TIER=FL /STK=0 /LL=3656 /UG=Hs.249175 /DEF=Homo sapiens interleukin-1 receptor-associated kinase 2 (IRAK2), mRNA. /PROD=interleukin-1 receptor-associated kinase 2 /FL=gb:AF026273.1 gb:NM_001570.2
1553740_a_at	23.6	A	87.4	A	54.7	A	37.5	A	72.2	A	65.6	A	36.2	A	8.6	A	193.5	A	20.6	A	18.3	A	140.1	A	gb:NM_001570.2 /DB_XREF=gi:21614547 /GEN=IRAK2 /TID=Hs2.249175.1 /CNT=10 /FEA=FLmRNA /TIER=FL /STK=0 /LL=3656 /UG=Hs.249175 /DEF=Homo sapiens interleukin-1 receptor-associated kinase 2 (IRAK2), mRNA. /PROD=interleukin-1 receptor-associated kinase 2 /FL=gb:AF026273.1 gb:NM_001570.2
1553741_at	16.2	A	8	A	3.9	A	4.8	A	9.3	A	11	A	21.8	A	4.3	A	8	A	8.2	A	6.6	A	17.6	A	gb:NM_153709.1 /DB_XREF=gi:24308423 /TID=Hs2.333225.1 /CNT=10 /FEA=FLmRNA /TIER=FL /STK=0 /LL=148645 /UG_GENE=MGC40168 /UG=Hs.333225 /UG_TITLE=hypothetical protein MGC40168 /DEF=Homo sapiens hypothetical protein MGC40168 (MGC40168), mRNA. /FL=gb:NM_153709.1 gb:BC030279.1
[truncated: 53,528 more rows]
